# Supplementary material for: Phenotyping of immune and endometrial epithelial cells in endometrial carcinomas revealed by single-cell RNA sequencing
Source: Aging (Albany NY). 2021 Jan 10;13(5):6565–91. doi: 10.18632/aging.202288 (PMC7993685; doi:10.18632/aging.202288)
Supplement: Additional File 1 [file aging-13-202288-s002.xlsx]

## Sheet: CD4 T.Tumor vs Para.DEGs
Additional File 1. DEGs of tumor vs para of T cell types.
gene	p value	logFC	pct.1	pct.2	p value_adj
PTPRC	1.94952e-72	0.73448	0.995	0.972	3.66178e-68
FTL	5.49749e-71	-0.692736	0.979	0.998	1.03259e-66
APOE	7.15265e-69	-1.11832	0.043	0.624	1.34348e-64
SPP1	1.05898e-57	-0.977049	0.107	0.647	1.98909e-53
APOC1	7.72571e-55	-0.960431	0.016	0.507	1.45112e-50
ETS1	6.9498e-54	0.900844	0.826	0.454	1.30538e-49
FAM118A	3.95033e-48	0.729299	0.555	0.104	7.41991e-44
IL7R	9.48917e-48	0.863275	0.941	0.803	1.78235e-43
HSPA1B	6.41641e-43	-1.54515	0.469	0.791	1.2052e-38
HSPA1A	2.10985e-41	-1.51615	0.445	0.801	3.96293e-37
HLA-B	4.96296e-41	-0.436146	1	1	9.32193e-37
SFRP4	1.86996e-36	0.705244	0.311	0.015	3.51235e-32
SMCHD1	2.50304e-33	0.672036	0.743	0.4	4.70146e-29
HLA-DRA	3.79492e-33	-0.729738	0.257	0.649	7.128e-29
HSPA8	1.14414e-32	-0.574901	0.901	0.972	2.14904e-28
PRDM1	3.40897e-31	0.71689	0.611	0.249	6.40308e-27
RNF19A	2.19959e-30	0.790828	0.563	0.23	4.1315e-26
PIK3R1	9.61549e-30	0.850328	0.686	0.402	1.80608e-25
CREM	4.04853e-27	0.650333	0.713	0.406	7.60436e-23
RPS10	4.12173e-27	0.318561	1	0.987	7.74184e-23
SRGN	5.45411e-27	0.425923	0.995	0.956	1.02445e-22
HSPA6	8.29291e-27	-1.44995	0.064	0.376	1.55766e-22
DNAJB1	9.75199e-27	-0.879568	0.676	0.86	1.83172e-22
PDE4B	4.75603e-26	0.582395	0.539	0.209	8.93325e-22
GSPT1	1.18332e-25	0.552241	0.534	0.211	2.22263e-21
AIM1	5.03412e-25	0.570937	0.617	0.3	9.45559e-21
C1QA	8.39185e-25	-0.490164	0.021	0.287	1.57624e-20
IGLL5	1.39794e-24	-0.551169	0.121	0.45	2.62574e-20
C1QB	4.0742e-24	-0.479873	0.027	0.296	7.65256e-20
HSPB1	4.94142e-24	-0.755702	0.633	0.816	9.28148e-20
TXNIP	1.86268e-23	0.498091	0.992	0.947	3.49867e-19
ARID5B	2.30969e-23	0.585362	0.598	0.292	4.3383e-19
SYNE2	2.57848e-22	0.57697	0.686	0.416	4.84316e-18
SCGB1D2	3.28735e-22	0.520925	0.263	0.042	6.17462e-18
HSPE1	1.13297e-21	-0.622299	0.638	0.829	2.12806e-17
CCNL1	2.79991e-21	0.499402	0.708	0.44	5.25906e-17
ATF7IP	3.70457e-21	0.54687	0.458	0.184	6.95829e-17
CD74	9.56898e-21	-0.60871	0.767	0.92	1.79734e-16
PPP1CB	3.11442e-20	0.347789	0.718	0.427	5.84981e-16
RORA	4.51956e-20	0.528226	0.705	0.429	8.48909e-16
MT2A	1.22737e-19	-0.599062	0.485	0.742	2.30536e-15
HSP90AA1	1.5407e-19	-0.497224	0.938	0.966	2.8939e-15
CNOT6L	1.74622e-19	0.495188	0.59	0.336	3.27992e-15
MYBL1	4.00956e-19	0.557622	0.316	0.091	7.53116e-15
TMEM66	7.75734e-19	0.385771	0.962	0.945	1.45706e-14
ITGB1	9.69348e-19	0.48345	0.7	0.433	1.82073e-14
UBC	1.92006e-18	-0.543743	0.941	0.972	3.60644e-14
IFI16	2.82541e-18	0.473365	0.799	0.619	5.30696e-14
SPOCK2	4.27623e-18	0.380636	0.796	0.579	8.03204e-14
RNF125	4.67182e-18	0.467822	0.408	0.156	8.77507e-14
LEPROTL1	4.77122e-18	0.403898	0.866	0.713	8.96178e-14
MT-ND4L	5.09534e-18	0.479209	0.737	0.552	9.57057e-14
XIST	8.17635e-18	0.427024	0.686	0.406	1.53576e-13
ELF1	8.55857e-18	0.375239	0.767	0.573	1.60756e-13
CTSD	9.01046e-18	-0.477934	0.44	0.676	1.69243e-13
TYROBP	9.06856e-18	-0.432317	0.107	0.37	1.70335e-13
GZMB	1.29292e-17	-0.581412	0.19	0.452	2.42849e-13
AIF1	2.18795e-17	-0.460852	0.046	0.26	4.10962e-13
EMB	4.64774e-17	0.388272	0.729	0.474	8.72985e-13
SLC38A1	5.56517e-17	0.485003	0.528	0.287	1.04531e-12
TMEM2	7.04639e-17	0.436427	0.397	0.157	1.32352e-12
VPS13C	9.45804e-17	0.417006	0.45	0.197	1.7765e-12
SMAP2	2.51883e-16	0.492929	0.523	0.285	4.73112e-12
DYNLL1	3.17749e-16	-0.405548	0.609	0.789	5.96828e-12
JAK1	4.27467e-16	0.38264	0.777	0.565	8.02912e-12
TUBA1B	1.19577e-15	-0.455084	0.45	0.676	2.24602e-11
GPR183	1.20713e-15	0.360009	0.81	0.605	2.26735e-11
ZFP36L2	1.32413e-15	0.351196	0.968	0.917	2.48712e-11
GPRIN3	3.35135e-15	0.471207	0.399	0.173	6.29484e-11
PPP2R5C	5.86475e-15	0.379762	0.748	0.522	1.10158e-10
PDE4D	7.30714e-15	0.463751	0.359	0.148	1.3725e-10
PDE3B	7.62458e-15	0.452956	0.34	0.129	1.43212e-10
FAM129A	7.71392e-15	0.411011	0.349	0.139	1.44891e-10
RPS6	7.80135e-15	0.269559	1	1	1.46533e-10
KIAA1109	8.18682e-15	0.324509	0.279	0.082	1.53773e-10
MT-ND3	1.23786e-14	-0.312257	0.989	0.985	2.32507e-10
UBB	1.69818e-14	-0.360392	0.965	0.964	3.18969e-10
FYN	1.74152e-14	0.440595	0.587	0.357	3.2711e-10
LGALS1	2.12349e-14	-0.602016	0.563	0.742	3.98856e-10
NPC2	2.38342e-14	-0.419441	0.268	0.505	4.47678e-10
CISH	2.56642e-14	-0.465729	0.062	0.258	4.8205e-10
SF3B1	2.61149e-14	0.378694	0.721	0.493	4.90517e-10
ARGLU1	2.69502e-14	0.380579	0.751	0.531	5.06205e-10
HLA-A	2.71282e-14	-0.264994	1	1	5.0955e-10
ARAP2	2.96875e-14	0.417427	0.383	0.171	5.5762e-10
SET	2.97189e-14	0.3509	0.662	0.419	5.5821e-10
CDC42	3.20149e-14	0.300395	0.866	0.66	6.01335e-10
CTSL	3.50248e-14	-0.424951	0.115	0.342	6.57872e-10
DDX39B	3.59694e-14	0.411453	0.44	0.222	6.75614e-10
EML4	3.9047e-14	0.383717	0.662	0.45	7.33419e-10
KIAA1551	4.4231e-14	0.417527	0.713	0.516	8.3079e-10
TNFAIP3	4.51911e-14	0.365696	0.721	0.509	8.48824e-10
LCP1	4.96341e-14	0.353333	0.866	0.702	9.32278e-10
TOP2B	8.31871e-14	0.362808	0.295	0.106	1.5625e-09
FKBP5	1.12533e-13	0.41137	0.534	0.296	2.11371e-09
PRKX	1.19291e-13	0.35528	0.346	0.139	2.24065e-09
DDX5	1.23954e-13	0.271525	0.989	0.935	2.32823e-09
TLN1	1.60529e-13	0.407271	0.491	0.269	3.01521e-09
CCL3	2.0206e-13	-0.677911	0.083	0.279	3.7953e-09
STK17B	3.63231e-13	0.398504	0.794	0.626	6.82257e-09
SELL	3.97417e-13	0.676655	0.531	0.324	7.46468e-09
CDV3	8.00946e-13	0.37553	0.408	0.201	1.50442e-08
NCL	8.09316e-13	0.335259	0.802	0.615	1.52014e-08
AHNAK	9.15876e-13	0.420209	0.485	0.273	1.72029e-08
WNK1	9.97984e-13	0.349656	0.418	0.207	1.87451e-08
CDKN1B	1.06105e-12	0.375692	0.539	0.332	1.99298e-08
HLA-DRB1	1.1466e-12	-0.542231	0.29	0.516	2.15365e-08
G3BP2	1.58786e-12	0.428563	0.603	0.395	2.98247e-08
FNBP1	1.6058e-12	0.362532	0.743	0.567	3.01617e-08
ITGA4	2.53073e-12	0.404675	0.483	0.277	4.75348e-08
RPL17	2.53375e-12	0.279044	0.914	0.861	4.75915e-08
PFN1	3.37284e-12	-0.281775	0.992	1	6.33521e-08
PAK2	3.49646e-12	0.366994	0.531	0.317	6.56739e-08
UTRN	4.92127e-12	0.341399	0.359	0.159	9.24362e-08
PBXIP1	5.33844e-12	0.35132	0.657	0.457	1.00272e-07
PNRC1	5.95941e-12	0.365059	0.887	0.782	1.11936e-07
SEC14L1	7.22606e-12	0.299926	0.279	0.102	1.35727e-07
LINC-PINT	7.2645e-12	0.338643	0.448	0.224	1.36449e-07
PFKFB3	8.89226e-12	0.373319	0.375	0.176	1.67023e-07
CEP350	1.0576e-11	0.322512	0.322	0.137	1.98649e-07
CAPG	1.06026e-11	-0.489075	0.389	0.581	1.99148e-07
EPB41	1.19284e-11	0.334144	0.394	0.192	2.24051e-07
PTGER4	1.35351e-11	0.397556	0.59	0.374	2.54229e-07
DUSP1	1.71467e-11	-0.692164	0.879	0.843	3.22067e-07
MZT2B	1.92069e-11	0.27763	0.745	0.562	3.60763e-07
STK4	1.97954e-11	0.323814	0.788	0.649	3.71817e-07
PTPN6	2.37631e-11	-0.362212	0.129	0.323	4.46343e-07
KLF2	3.15309e-11	0.403946	0.665	0.457	5.92245e-07
DEDD2	3.2935e-11	-0.360936	0.105	0.281	6.18617e-07
SYTL3	3.38356e-11	0.349611	0.477	0.268	6.35535e-07
YWHAZ	3.59179e-11	0.310074	0.767	0.624	6.74646e-07
HLA-DPB1	4.57966e-11	-0.443609	0.349	0.539	8.60198e-07
IFI27	7.11325e-11	-0.368812	0.097	0.271	1.33608e-06
CD63	8.34707e-11	-0.385927	0.475	0.63	1.56783e-06
CST3	8.91743e-11	-0.374483	0.204	0.398	1.67496e-06
ANKRD36C	1.04583e-10	0.318692	0.327	0.148	1.96438e-06
FAM107B	1.09787e-10	0.294905	0.603	0.408	2.06212e-06
TCEA1	1.20908e-10	0.321215	0.622	0.423	2.27101e-06
SC5D	1.24269e-10	0.392276	0.338	0.161	2.33414e-06
IQGAP2	1.47885e-10	0.341113	0.346	0.165	2.77772e-06
LSP1	2.28329e-10	-0.329635	0.732	0.814	4.2887e-06
ZCCHC11	2.36571e-10	0.30208	0.434	0.233	4.44352e-06
ANKRD36	2.3969e-10	0.362163	0.373	0.194	4.5021e-06
NEAT1	2.91968e-10	0.341693	0.777	0.653	5.48404e-06
CCR6	6.77326e-10	0.329092	0.421	0.231	1.27222e-05
IVNS1ABP	6.85081e-10	0.282875	0.378	0.19	1.28679e-05
PRRC2C	8.46718e-10	0.346148	0.702	0.579	1.59039e-05
STAT4	8.59691e-10	0.338321	0.421	0.237	1.61476e-05
AKAP13	8.72911e-10	0.277742	0.625	0.436	1.63959e-05
GPBP1	1.02491e-09	0.265139	0.697	0.501	1.9251e-05
KLRB1	1.1011e-09	0.375317	0.727	0.531	2.0682e-05
LPIN2	1.10258e-09	0.305401	0.402	0.216	2.07098e-05
FRMD4B	1.187e-09	0.419983	0.3	0.142	2.22954e-05
PABPC1	1.31133e-09	0.262131	0.992	0.962	2.46306e-05
RSRC2	1.51617e-09	0.316	0.614	0.438	2.84781e-05
DDX17	1.70643e-09	0.346347	0.598	0.435	3.20519e-05
TNRC6B	1.84442e-09	0.310336	0.542	0.351	3.46438e-05
USP47	1.95968e-09	0.256174	0.319	0.15	3.68086e-05
IPCEF1	1.96025e-09	0.291782	0.327	0.161	3.68193e-05
HP1BP3	2.1098e-09	0.334976	0.539	0.343	3.96283e-05
XRN1	2.16342e-09	0.270268	0.373	0.195	4.06355e-05
DDX3X	2.36816e-09	0.323396	0.547	0.376	4.44811e-05
NFE2L2	2.52517e-09	0.310567	0.391	0.211	4.74302e-05
PARP8	2.60775e-09	0.354827	0.405	0.231	4.89815e-05
PTPRCAP	3.07893e-09	-0.284889	0.944	0.937	5.78315e-05
DNAJA1	5.3492e-09	-0.413478	0.547	0.677	0.000100474
SYNRG	5.37078e-09	0.299361	0.475	0.29	0.000100879
SAMSN1	5.46574e-09	0.313566	0.708	0.529	0.000102663
YPEL3	6.02862e-09	0.290451	0.343	0.18	0.000113236
NFKB1	6.23851e-09	0.30665	0.287	0.131	0.000117178
C1orf63	1.04845e-08	0.26496	0.748	0.602	0.000196931
PCM1	1.1868e-08	0.297563	0.499	0.315	0.000222916
CHD3	1.24735e-08	0.277617	0.303	0.148	0.00023429
TMF1	1.30545e-08	0.275286	0.389	0.218	0.000245202
SMEK1	1.49586e-08	0.262515	0.271	0.121	0.000280968
DOCK10	1.59174e-08	0.291125	0.335	0.182	0.000298976
CLEC2D	1.59521e-08	0.317374	0.48	0.315	0.000299629
PDCD4	1.64233e-08	0.342371	0.651	0.497	0.000308478
PTGER2	1.69356e-08	0.31872	0.367	0.199	0.000318101
RGS2	1.91346e-08	-0.496451	0.402	0.59	0.000359405
RPSAP58	2.07751e-08	0.275211	0.582	0.421	0.000390219
CD52	2.09385e-08	-0.280782	0.979	0.992	0.000393288
EIF3A	2.15096e-08	0.288539	0.512	0.347	0.000404016
MBNL1	2.2249e-08	0.296967	0.622	0.465	0.000417902
MAF	2.26068e-08	0.285896	0.375	0.211	0.000424624
TTC3	2.44026e-08	0.301019	0.432	0.268	0.000458355
BST2	2.5093e-08	-0.335759	0.351	0.505	0.000471322
FAM177A1	2.74798e-08	0.269374	0.566	0.398	0.000516153
BIRC2	2.7487e-08	0.28026	0.338	0.176	0.000516289
AP3M2	3.16469e-08	0.311855	0.257	0.118	0.000594424
KLF3	3.1989e-08	0.258844	0.332	0.173	0.00060085
ATRX	4.39924e-08	0.281821	0.55	0.38	0.000826308
RBL2	4.90449e-08	0.265526	0.542	0.368	0.000921211
FAM65B	4.91363e-08	0.294757	0.453	0.292	0.000922927
MGAT4A	5.56118e-08	0.276873	0.456	0.294	0.00104456
PHF3	5.99979e-08	0.28254	0.391	0.235	0.00112694
SRSF7	6.03374e-08	0.281119	0.804	0.71	0.00113332
EZR	6.8583e-08	0.253803	0.63	0.471	0.0012882
CXCR3	7.19882e-08	-0.403048	0.204	0.357	0.00135215
H1FX	8.56555e-08	0.258405	0.413	0.249	0.00160887
RPS6KA3	1.05667e-07	0.251674	0.295	0.152	0.00198474
GZMA	1.11137e-07	-0.57247	0.41	0.575	0.00208748
CHD1	1.15115e-07	0.252192	0.418	0.249	0.0021622
ZC3HAV1	1.18347e-07	0.256536	0.493	0.336	0.00222291
CD28	1.22649e-07	0.282452	0.311	0.169	0.00230372
ANKRD11	1.26529e-07	0.286207	0.408	0.249	0.0023766
TLK1	1.29848e-07	0.281388	0.408	0.249	0.00243894
PRKDC	1.30015e-07	0.26609	0.298	0.156	0.00244206
MATR3	1.45707e-07	0.26235	0.555	0.404	0.00273681
CD82	1.56512e-07	-0.308542	0.204	0.361	0.00293976
LBR	1.59182e-07	0.26095	0.416	0.254	0.00298992
SLPI	1.9053e-07	0.292752	0.362	0.22	0.00357872
CTSB	1.92414e-07	-0.286125	0.375	0.528	0.00361411
SLFN5	1.9578e-07	0.286909	0.496	0.343	0.00367733
GOLGB1	1.97813e-07	0.263202	0.33	0.184	0.00371552
PPP1R15A	1.98628e-07	-0.444229	0.528	0.645	0.00373083
CANX	2.16032e-07	0.264518	0.437	0.279	0.00405773
GAPDH	2.17244e-07	-0.25339	0.992	0.985	0.0040805
SKIL	2.23898e-07	0.300776	0.357	0.207	0.00420547
DOK2	2.31497e-07	-0.284489	0.306	0.474	0.00434821
CCL4	2.69186e-07	-0.408005	0.402	0.577	0.00505613
TAX1BP1	3.34122e-07	0.283243	0.63	0.52	0.00627581
PRMT10	3.34774e-07	-0.314592	0.198	0.345	0.00628806
TRAF3IP3	3.59589e-07	-0.278654	0.456	0.611	0.00675415
BCLAF1	4.18189e-07	0.260389	0.52	0.353	0.00785484
TPI1	4.36834e-07	-0.302762	0.729	0.784	0.00820504
MDFIC	4.84916e-07	0.259939	0.295	0.161	0.00910817
SPTBN1	5.65063e-07	0.277639	0.257	0.131	0.0106136
APOBEC3G	5.89285e-07	-0.31594	0.322	0.465	0.0110685
ZC3H7A	5.99391e-07	0.268149	0.252	0.129	0.0112584
WFDC2	6.0334e-07	0.273058	0.507	0.347	0.0113325
KIAA1430	6.41964e-07	0.300772	0.357	0.218	0.012058
KMT2A	6.5861e-07	0.281683	0.284	0.154	0.0123707
JUN	7.11889e-07	-0.487329	0.882	0.905	0.0133714
GPX1	9.41251e-07	-0.29999	0.472	0.598	0.0176795
HIST1H1D	1.00037e-06	0.291429	0.316	0.184	0.0187899
CYLD	1.02077e-06	0.277135	0.483	0.33	0.0191732
TMEM123	1.1556e-06	0.257161	0.729	0.617	0.0217056
NR3C1	1.17281e-06	0.301884	0.466	0.319	0.0220289
FNBP4	1.20509e-06	0.254373	0.402	0.258	0.0226353
BCL2	1.36846e-06	0.275691	0.332	0.195	0.0257037
TMOD3	1.68846e-06	0.250613	0.351	0.22	0.0317144
GLIPR1	1.70723e-06	0.27324	0.496	0.359	0.0320668
SRRM2	1.85322e-06	0.256882	0.531	0.406	0.034809
RGS1	1.92434e-06	0.360072	0.845	0.82	0.0361448
NFKBIZ	1.93102e-06	0.272394	0.33	0.19	0.0362704
MRPL18	2.36758e-06	-0.25159	0.188	0.328	0.0444703
CASP8	2.60546e-06	0.250831	0.34	0.207	0.0489383
MBP	2.79673e-06	0.25048	0.432	0.3	0.052531
CKLF	3.45475e-06	-0.306686	0.574	0.689	0.0648906
XRN2	3.61026e-06	0.282546	0.44	0.309	0.0678115
MRPL51	3.74152e-06	-0.262106	0.287	0.435	0.070277
NAP1L4	4.33103e-06	0.274813	0.515	0.387	0.0813497
ITSN2	4.54825e-06	0.274412	0.397	0.264	0.0854299
LY6E	5.21454e-06	-0.258006	0.576	0.681	0.0979448
C12orf57	5.54774e-06	-0.269304	0.547	0.634	0.104203
ANXA2	6.04852e-06	-0.297933	0.52	0.63	0.113609
TYMP	6.93143e-06	-0.275786	0.263	0.402	0.130193
FOXP1	8.22841e-06	0.25764	0.475	0.355	0.154554
SCGB2A1	8.68157e-06	0.389308	0.34	0.23	0.163066
HIF1A	8.8153e-06	0.250177	0.421	0.285	0.165578
HLA-DPA1	9.15195e-06	-0.271744	0.311	0.452	0.171901
TOB1	1.2513e-05	0.26512	0.52	0.385	0.235032
EVI2B	1.29228e-05	0.258573	0.67	0.573	0.242728
CCL5	1.42759e-05	-0.53242	0.555	0.67	0.268145
GPR171	1.61968e-05	0.332664	0.507	0.404	0.304224
PSME2	2.05876e-05	-0.256898	0.646	0.723	0.386697
NKG7	2.16679e-05	-0.479715	0.322	0.452	0.406989
REL	2.21471e-05	0.285275	0.357	0.231	0.415989
S100A4	3.34466e-05	-0.25781	0.957	0.958	0.628228
ZBTB38	4.55212e-05	0.272903	0.34	0.23	0.855026
CAST	0.000128745	0.262944	0.517	0.433	1
RP11-796E2.4	0.000169906	-0.301645	0.166	0.266	1
HIST1H4C	0.000796428	-0.263031	0.389	0.472	1
RPS26	0.000999256	-0.379603	0.858	0.877	1
ISG15	0.00136115	-0.260324	0.44	0.509	1
RGCC	0.00159565	-0.323441	0.437	0.516	1
CYCS	0.00225928	-0.268727	0.536	0.607	1

## Sheet: Treg.Tumor vs Para.DEGs
gene	p value	logFC	pct.1	pct.2	p value_adj
HSPA1B	4.01319e-42	-2.39302	0.35	0.917	7.53797e-38
FTL	1.29325e-37	-0.898426	1	1	2.42911e-33
HSPA1A	1.4052e-36	-2.2241	0.528	0.914	2.63938e-32
SFRP4	4.44211e-33	0.882775	0.455	0.018	8.34361e-29
PTPRC	9.45871e-32	0.755378	1	0.972	1.77663e-27
APOE	2.11851e-30	-1.27096	0.073	0.702	3.9792e-26
ETS1	9.97456e-30	1.04171	0.894	0.439	1.87352e-25
STK17B	2.77114e-29	0.940832	0.951	0.653	5.20504e-25
PRDM1	3.64014e-28	1.01886	0.927	0.491	6.83728e-24
FAM118A	9.27662e-28	0.745685	0.65	0.135	1.74243e-23
SPP1	3.65222e-27	-1.07985	0.138	0.718	6.85997e-23
SYTL3	5.59384e-22	0.850063	0.707	0.273	1.05069e-17
APOC1	2.01869e-21	-1.03328	0.016	0.515	3.79171e-17
CREM	9.04108e-21	0.874168	0.911	0.601	1.69819e-16
HSPB1	1.05444e-20	-0.862372	0.78	0.926	1.98055e-16
SRGN	5.26383e-20	0.603086	1	0.979	9.88706e-16
AIM1	1.95849e-19	0.702594	0.545	0.135	3.67863e-15
SAMSN1	3.42064e-19	0.751422	0.927	0.782	6.42499e-15
RNF19A	3.59608e-19	0.873905	0.675	0.288	6.75451e-15
PIK3R1	2.09601e-18	0.977073	0.683	0.307	3.93694e-14
IL2RA	2.87442e-18	0.949584	0.878	0.5	5.39903e-14
DNAJB1	3.35949e-18	-1.25829	0.626	0.85	6.31012e-14
SEC14L1	4.36472e-18	0.639405	0.618	0.209	8.19825e-14
SMAP2	1.74086e-17	0.715057	0.699	0.316	3.26985e-13
HSP90AA1	2.31667e-17	-0.822016	0.976	0.994	4.3514e-13
MBNL1	3.83477e-17	0.680576	0.797	0.405	7.20284e-13
HLA-B	5.36388e-17	-0.358193	1	1	1.0075e-12
IVNS1ABP	6.88874e-17	0.70218	0.61	0.206	1.29391e-12
LCP1	9.66101e-17	0.608742	0.919	0.663	1.81463e-12
CEP350	1.81701e-16	0.546727	0.52	0.147	3.4129e-12
HIST1H1E	2.2203e-16	0.689206	0.455	0.11	4.17038e-12
REL	8.51729e-16	0.829649	0.724	0.353	1.5998e-11
HSPE1	9.2277e-16	-0.816968	0.78	0.893	1.73324e-11
SMCHD1	1.27534e-15	0.745026	0.748	0.405	2.39547e-11
BCL11B	2.13016e-15	0.465452	0.455	0.117	4.00107e-11
NRIP1	4.2306e-15	0.52637	0.439	0.107	7.94634e-11
ELF1	5.17901e-15	0.667017	0.846	0.577	9.72773e-11
HSPA8	5.75759e-15	-0.640538	0.927	0.966	1.08145e-10
RORA	1.05179e-14	0.78851	0.748	0.399	1.97558e-10
FOSL2	1.06388e-14	0.51812	0.463	0.132	1.99829e-10
ATP11B	1.27362e-14	0.40401	0.407	0.089	2.39224e-10
JUN	1.72781e-14	-1.22188	0.764	0.877	3.24534e-10
FRMD4B	2.93157e-14	0.714106	0.618	0.264	5.50636e-10
EFHD2	3.39285e-14	0.464091	0.715	0.316	6.37278e-10
PICALM	1.63854e-13	0.489406	0.504	0.166	3.07767e-09
PPP1CB	1.71539e-13	0.548771	0.78	0.469	3.22202e-09
GSPT1	2.06095e-13	0.592607	0.634	0.288	3.87109e-09
ATF7IP	2.27642e-13	0.614255	0.512	0.178	4.27579e-09
G3BP2	2.57141e-13	0.725621	0.756	0.46	4.82987e-09
COL3A1	2.72119e-13	0.358374	0.309	0.052	5.11121e-09
IL7R	2.91126e-13	0.778457	0.732	0.396	5.46822e-09
TOP2B	7.86812e-13	0.453642	0.415	0.113	1.47787e-08
MALT1	8.61867e-13	0.538051	0.504	0.184	1.61884e-08
UBB	1.0044e-12	-0.409121	0.976	1	1.88657e-08
IKZF2	2.35301e-12	0.53024	0.593	0.255	4.41967e-08
PFKFB3	2.63024e-12	0.49526	0.545	0.224	4.94037e-08
TMEM2	3.77076e-12	0.579627	0.447	0.147	7.08262e-08
PAK2	4.12922e-12	0.55169	0.772	0.479	7.75592e-08
TLN1	7.34381e-12	0.555745	0.642	0.325	1.37939e-07
ADAM12	8.78706e-12	0.414896	0.317	0.067	1.65047e-07
SF3B1	2.89605e-11	0.45017	0.862	0.567	5.43964e-07
TNFAIP3	3.62975e-11	0.492159	0.805	0.555	6.81776e-07
CTLA4	4.4579e-11	0.71967	0.821	0.561	8.37327e-07
ZC2HC1A	4.51328e-11	0.526759	0.415	0.138	8.4773e-07
NCL	4.89013e-11	0.435563	0.919	0.69	9.18513e-07
DDX17	5.1852e-11	0.52139	0.748	0.485	9.73936e-07
ENTPD1	7.26262e-11	0.548173	0.618	0.276	1.36414e-06
PDE4B	8.07573e-11	0.502052	0.545	0.236	1.51686e-06
ANKRD36C	8.77507e-11	0.37594	0.447	0.156	1.64822e-06
IFI16	9.17327e-11	0.561262	0.886	0.709	1.72302e-06
TTC37	1.05124e-10	0.266446	0.252	0.043	1.97455e-06
R3HDM2	1.14244e-10	0.344119	0.35	0.095	2.14584e-06
ID3	1.20308e-10	-0.971581	0.203	0.512	2.25974e-06
FYN	1.37577e-10	0.497557	0.756	0.488	2.58411e-06
MAP3K5	1.4565e-10	0.280961	0.276	0.055	2.73574e-06
C1QB	1.48405e-10	-0.580722	0.073	0.374	2.78749e-06
DOCK10	1.50309e-10	0.448362	0.52	0.218	2.82326e-06
UBC	1.68736e-10	-0.519353	1	0.985	3.16937e-06
SLC38A1	1.71602e-10	0.503415	0.618	0.307	3.2232e-06
CDC42	1.8724e-10	0.389626	0.935	0.755	3.51693e-06
NCK2	2.10774e-10	0.380185	0.472	0.169	3.95896e-06
HSPA6	2.34737e-10	-1.24465	0.016	0.294	4.40906e-06
GLIPR1	2.67888e-10	0.548868	0.642	0.344	5.03175e-06
MT2A	2.80162e-10	-0.705554	0.634	0.822	5.26228e-06
CCR6	3.14638e-10	0.447203	0.455	0.163	5.90985e-06
CTTNBP2NL	3.2562e-10	0.388475	0.358	0.104	6.11612e-06
NFKBIZ	3.266e-10	0.546281	0.602	0.304	6.13452e-06
CMTM6	3.49573e-10	0.546792	0.707	0.442	6.56604e-06
CHD1	3.50314e-10	0.481565	0.61	0.316	6.57996e-06
ITGB1	3.96653e-10	0.511644	0.78	0.479	7.45033e-06
GPR183	4.01455e-10	0.643288	0.732	0.436	7.54054e-06
BACH1	4.08674e-10	0.399137	0.398	0.132	7.67612e-06
CLEC2D	4.49837e-10	0.583955	0.74	0.439	8.44929e-06
IGLL5	4.56468e-10	-0.539603	0.154	0.482	8.57383e-06
C1QA	4.65829e-10	-0.577144	0.024	0.307	8.74967e-06
SMC5	4.82183e-10	0.432643	0.52	0.221	9.05685e-06
PRRC2B	6.91167e-10	0.320013	0.358	0.104	1.29822e-05
PTP4A2	9.14489e-10	0.482493	0.707	0.417	1.71768e-05
USP47	9.16378e-10	0.409839	0.488	0.196	1.72123e-05
ITM2A	9.30004e-10	0.528397	0.894	0.687	1.74683e-05
WNK1	9.3444e-10	0.417328	0.61	0.294	1.75516e-05
ARGLU1	9.76409e-10	0.424106	0.854	0.666	1.83399e-05
STAT4	1.00238e-09	0.392156	0.569	0.258	1.88277e-05
CSGALNACT2	1.21825e-09	0.385266	0.407	0.138	2.28824e-05
STK39	1.23221e-09	0.31393	0.276	0.064	2.31446e-05
NR3C1	1.25656e-09	0.512625	0.724	0.479	2.36019e-05
YWHAZ	1.5538e-09	0.417567	0.87	0.669	2.9185e-05
CHN1	1.6926e-09	0.541728	0.285	0.071	3.1792e-05
VPS13C	1.76739e-09	0.442248	0.577	0.279	3.31969e-05
CAPZA1	1.8849e-09	0.372671	0.821	0.571	3.54042e-05
STAM	1.91716e-09	0.383036	0.585	0.264	3.601e-05
ZNF331	2.03909e-09	0.580741	0.431	0.169	3.83002e-05
RASGRP1	2.17719e-09	0.454398	0.496	0.215	4.08942e-05
CDV3	2.97896e-09	0.390689	0.675	0.39	5.59538e-05
STT3B	3.26795e-09	0.36258	0.504	0.206	6.13818e-05
SRSF5	3.64063e-09	0.357693	0.919	0.718	6.83819e-05
CTSB	3.92407e-09	-0.53052	0.463	0.675	7.37058e-05
SNX9	4.23636e-09	0.365486	0.561	0.264	7.95716e-05
BIRC6	4.53542e-09	0.335738	0.455	0.169	8.51888e-05
CD38	4.5364e-09	0.380294	0.268	0.067	8.52073e-05
KAT2B	4.89029e-09	0.321001	0.309	0.089	9.18544e-05
MZT2B	5.1647e-09	0.415038	0.821	0.577	9.70086e-05
EPSTI1	5.50055e-09	0.401282	0.683	0.38	0.000103317
MATR3	7.0084e-09	0.376246	0.772	0.518	0.000131639
PTPLA	7.58084e-09	0.436285	0.374	0.138	0.000142391
ISCU	7.708e-09	-0.445162	0.675	0.816	0.000144779
H1FX	7.90566e-09	0.409138	0.561	0.267	0.000148492
NAMPT	8.73609e-09	0.530609	0.553	0.301	0.00016409
FCER1G	9.27832e-09	-0.412846	0.138	0.442	0.000174275
GPRIN3	1.01033e-08	0.393397	0.504	0.215	0.00018977
MT-ND4L	1.01295e-08	0.392934	0.813	0.571	0.000190263
IL18R1	1.13085e-08	0.446498	0.561	0.27	0.000212408
LEPROTL1	1.27054e-08	0.480137	0.797	0.617	0.000238646
ZFP36L2	1.43602e-08	0.509714	0.894	0.693	0.000269728
RP11-386I14.4	1.63887e-08	0.347576	0.252	0.061	0.000307828
2020-03-07	1.91888e-08	0.413781	0.61	0.316	0.000360424
SMARCA5	1.93856e-08	0.407966	0.642	0.337	0.00036412
FANK1	2.00854e-08	0.371011	0.52	0.239	0.000377264
ACSL4	2.02736e-08	0.395208	0.455	0.19	0.000380799
CNOT6L	2.05646e-08	0.540688	0.512	0.273	0.000386264
SRSF6	2.28273e-08	0.265557	0.463	0.175	0.000428766
AFF1	2.36606e-08	0.270955	0.26	0.067	0.000444417
UTRN	2.46327e-08	0.381779	0.293	0.089	0.000462675
PTPN22	2.55554e-08	0.329283	0.634	0.328	0.000480008
VPS37B	2.71157e-08	0.328501	0.301	0.089	0.000509315
RCAN3	2.74971e-08	0.387042	0.553	0.279	0.000516477
CEP55	2.90781e-08	0.395049	0.252	0.064	0.000546174
CCNH	3.04894e-08	0.469239	0.699	0.442	0.000572683
WHSC1L1	3.3923e-08	0.474329	0.715	0.5	0.000637175
RAB11FIP1	3.49237e-08	0.430233	0.61	0.344	0.000655971
AHNAK	3.76985e-08	0.408426	0.455	0.196	0.00070809
CHD2	3.90246e-08	0.437471	0.626	0.377	0.000732998
CD81	4.64237e-08	0.290883	0.358	0.123	0.000871976
HNRNPU	5.16802e-08	0.360209	0.87	0.666	0.000970709
CCNG2	5.27345e-08	0.362195	0.463	0.196	0.000990512
DUSP1	5.32509e-08	-1.08084	0.797	0.831	0.00100021
FAM129A	5.50539e-08	0.472283	0.569	0.307	0.00103408
RSBN1	5.77686e-08	0.420218	0.569	0.319	0.00108507
JMJD1C	5.8457e-08	0.372637	0.545	0.276	0.001098
DIAPH1	5.94846e-08	0.347638	0.504	0.239	0.0011173
HIST1H1C	6.05684e-08	0.425406	0.528	0.27	0.00113766
TPM4	6.09747e-08	0.495023	0.789	0.558	0.00114529
NFE2L2	6.46015e-08	0.422931	0.561	0.291	0.00121341
ARHGAP5	6.60226e-08	0.387817	0.317	0.107	0.0012401
RPS5	7.20598e-08	-0.264886	1	0.994	0.0013535
IL6ST	8.33085e-08	0.307179	0.317	0.104	0.00156478
USP34	8.58847e-08	0.348998	0.488	0.233	0.00161317
RAB8B	9.68204e-08	0.399632	0.512	0.261	0.00181858
JOSD1	9.84865e-08	0.32216	0.398	0.156	0.00184987
RNF125	1.05477e-07	0.396804	0.358	0.132	0.00198117
MYO5A	1.09908e-07	0.272577	0.317	0.107	0.00206441
SMEK1	1.24973e-07	0.309183	0.415	0.169	0.00234737
EGR1	1.29278e-07	0.274909	0.309	0.098	0.00242823
TPI1	1.32447e-07	-0.348714	0.87	0.923	0.00248776
CYTIP	1.46767e-07	0.314301	0.943	0.825	0.00275673
BTG3	1.86721e-07	0.402838	0.772	0.54	0.00350717
SPTBN1	1.93131e-07	0.303194	0.276	0.086	0.00362758
GPBP1	1.94131e-07	0.406043	0.772	0.583	0.00364636
HERC1	1.98622e-07	0.318984	0.358	0.135	0.00373071
SET	2.02623e-07	0.356839	0.78	0.534	0.00380587
BCL2	2.04012e-07	0.377304	0.472	0.227	0.00383195
ATP6V1F	2.18945e-07	-0.345711	0.496	0.706	0.00411244
STK4	2.1903e-07	0.443085	0.821	0.647	0.00411405
CBLB	2.28966e-07	0.375407	0.439	0.209	0.00430067
PHF3	2.40723e-07	0.352789	0.48	0.23	0.00452149
ERBB2IP	2.60215e-07	0.4114	0.439	0.209	0.00488762
DDX39B	2.64843e-07	0.394901	0.504	0.252	0.00497454
ANP32E	2.77689e-07	0.339799	0.602	0.322	0.00521583
IQGAP1	2.82753e-07	0.348822	0.748	0.5	0.00531096
FOXO1	2.93099e-07	0.291298	0.423	0.181	0.00550528
PELI1	2.97306e-07	0.309391	0.431	0.187	0.00558429
KMT2C	3.13247e-07	0.303583	0.35	0.132	0.00588373
CD55	3.17092e-07	0.265431	0.285	0.089	0.00595594
CCR4	3.23376e-07	0.275897	0.276	0.086	0.00607397
UGP2	3.4426e-07	0.343399	0.902	0.761	0.00646623
LINC-PINT	3.56018e-07	0.34146	0.398	0.169	0.00668708
SNRNP200	4.13352e-07	0.313935	0.382	0.156	0.00776399
XRN1	4.24799e-07	0.336588	0.512	0.27	0.007979
SEC63	4.73512e-07	0.287066	0.407	0.175	0.00889397
SUZ12	4.73858e-07	0.300534	0.358	0.144	0.00890047
UBR5	4.7854e-07	0.252565	0.341	0.123	0.00898842
ITK	5.00176e-07	0.358284	0.528	0.267	0.00939481
MTPN	5.20326e-07	0.310472	0.455	0.206	0.00977329
GLS	5.35517e-07	0.300601	0.374	0.153	0.0100586
TCEA1	5.6047e-07	0.335371	0.732	0.518	0.0105273
ZFP36	5.87917e-07	0.362823	0.911	0.702	0.0110428
PNPLA8	5.95712e-07	0.265057	0.358	0.141	0.0111893
PDCD4	6.23165e-07	0.428612	0.553	0.334	0.0117049
CCNL1	6.27791e-07	0.346074	0.74	0.549	0.0117918
KIAA1109	6.65209e-07	0.284412	0.309	0.11	0.0124946
ARID4B	6.75189e-07	0.35678	0.74	0.506	0.0126821
RBL2	6.76536e-07	0.37769	0.423	0.196	0.0127074
DYNC1H1	6.88964e-07	0.285123	0.415	0.181	0.0129408
STAT3	6.89272e-07	0.377596	0.789	0.601	0.0129466
TMEM66	7.03014e-07	0.379722	0.943	0.917	0.0132047
TTC3	7.25952e-07	0.37799	0.569	0.325	0.0136356
NPC2	7.79375e-07	-0.409427	0.39	0.62	0.014639
JAK1	7.92834e-07	0.362062	0.87	0.776	0.0148918
MT-ND3	8.18392e-07	-0.345884	0.984	0.979	0.0153719
SC5D	8.64513e-07	0.341561	0.325	0.123	0.0162381
METTL9	8.75686e-07	0.331135	0.74	0.454	0.016448
CHD3	9.31983e-07	0.376258	0.423	0.202	0.0175054
KIF20B	1.20396e-06	0.312602	0.39	0.172	0.022614
MSL2	1.2277e-06	0.259467	0.325	0.126	0.0230598
CST3	1.23874e-06	-0.423846	0.268	0.488	0.0232673
CHD4	1.27324e-06	0.343279	0.52	0.27	0.0239152
ANKRD11	1.2793e-06	0.345702	0.52	0.282	0.0240292
FNDC3B	1.30568e-06	0.270812	0.276	0.095	0.0245246
FBXW7	1.31085e-06	0.25438	0.293	0.104	0.0246217
MORC3	1.31473e-06	0.295119	0.382	0.166	0.0246945
PHTF2	1.3148e-06	0.358451	0.593	0.347	0.0246959
CUL3	1.33848e-06	0.304018	0.358	0.15	0.0251407
PCBP2	1.34026e-06	0.295132	0.862	0.647	0.0251741
SPAG9	1.45012e-06	0.293548	0.415	0.193	0.0272375
RBM39	1.59109e-06	0.307561	0.943	0.788	0.0298855
CXCR3	1.65328e-06	-0.467054	0.407	0.644	0.0310535
SPTY2D1	1.89415e-06	0.264557	0.341	0.138	0.0355778
DDX24	1.94894e-06	0.300274	0.919	0.758	0.0366069
EMB	2.02979e-06	0.3344	0.642	0.423	0.0381255
HNRNPDL	2.03291e-06	0.331253	0.902	0.702	0.0381841
NAP1L1	2.03919e-06	0.3152	0.902	0.81	0.038302
ZCCHC6	2.10761e-06	0.278061	0.455	0.221	0.0395872
NCOA3	2.10849e-06	0.36923	0.415	0.206	0.0396038
ARAP2	2.14714e-06	0.35718	0.407	0.187	0.0403298
C1orf63	2.23266e-06	0.363069	0.813	0.626	0.0419361
PHACTR2	2.31556e-06	0.38821	0.569	0.337	0.0434932
OGT	2.32588e-06	0.325102	0.333	0.135	0.0436869
RBM38	2.34932e-06	0.273888	0.374	0.16	0.0441273
ZC3H7A	2.3953e-06	0.3655	0.61	0.356	0.0449909
PDE7A	2.738e-06	0.298737	0.285	0.107	0.0514279
LINC00657	2.98539e-06	0.254546	0.407	0.178	0.0560745
RASA2	3.15485e-06	0.309938	0.333	0.138	0.0592575
HP1BP3	3.22918e-06	0.339217	0.634	0.393	0.0606538
FAM172A	3.34195e-06	0.270615	0.325	0.129	0.0627718
MGEA5	3.34693e-06	0.368963	0.577	0.377	0.0628654
OSTF1	3.41671e-06	0.376908	0.715	0.509	0.064176
EPC1	3.44548e-06	0.361504	0.634	0.396	0.0647164
MDFIC	3.44715e-06	0.34769	0.431	0.212	0.0647478
KAT6A	3.62102e-06	0.304631	0.358	0.156	0.0680137
ICOS	3.72732e-06	0.464714	0.715	0.525	0.0700103
YPEL3	3.78103e-06	0.269008	0.512	0.258	0.0710191
SFPQ	3.83035e-06	0.351444	0.789	0.61	0.0719455
P2RY10	3.89664e-06	0.290464	0.569	0.316	0.0731907
EPS15	3.97909e-06	0.250848	0.48	0.23	0.0747393
ROCK1	4.17572e-06	0.335841	0.634	0.417	0.0784326
HIST1H1D	4.32044e-06	0.385819	0.455	0.236	0.0811508
TMF1	4.78673e-06	0.301627	0.472	0.248	0.0899091
KPNA4	4.95889e-06	0.292169	0.333	0.147	0.0931427
ZCCHC11	5.06345e-06	0.286313	0.455	0.23	0.0951067
RAB21	5.07921e-06	0.257618	0.276	0.101	0.0954029
MGAT1	5.18523e-06	-0.403463	0.268	0.466	0.0973942
RHOB	5.18782e-06	-0.609389	0.203	0.39	0.0974428
DEDD2	5.23923e-06	-0.380291	0.138	0.34	0.0984085
ARPP19	5.28476e-06	0.352991	0.65	0.417	0.0992637
BPTF	5.41659e-06	0.351633	0.537	0.307	0.10174
TPM3	5.57772e-06	0.28105	0.894	0.837	0.104766
TNKS2	5.63328e-06	0.284835	0.268	0.098	0.10581
KIAA1551	5.83753e-06	0.373837	0.65	0.466	0.109646
IPCEF1	6.0469e-06	0.328076	0.415	0.209	0.113579
HLA-DQA2	6.26023e-06	0.291118	0.26	0.095	0.117586
LAYN	7.08963e-06	0.347912	0.65	0.411	0.133165
FGFR1OP2	8.14281e-06	0.280222	0.634	0.411	0.152946
CD48	8.25694e-06	0.322163	0.772	0.543	0.15509
SETX	8.53474e-06	0.328138	0.407	0.202	0.160308
ANP32B	8.70671e-06	0.342616	0.789	0.607	0.163538
CBFB	9.03086e-06	0.348316	0.48	0.264	0.169627
AC006129.4	9.14596e-06	-0.43719	0.106	0.301	0.171789
FNBP1	9.23702e-06	0.39759	0.78	0.555	0.173499
DNAJA2	9.40305e-06	0.334369	0.561	0.337	0.176617
MYH9	9.59082e-06	0.354912	0.577	0.365	0.180144
TRIP12	9.97269e-06	0.266449	0.407	0.193	0.187317
EIF4B	1.02156e-05	0.289815	0.772	0.525	0.19188
PNRC1	1.03513e-05	0.319471	0.878	0.785	0.194428
ZMYM2	1.06376e-05	0.267643	0.423	0.199	0.199806
CARD8	1.12582e-05	0.277006	0.439	0.221	0.211463
SYAP1	1.13191e-05	0.300332	0.585	0.356	0.212606
DDX3X	1.15282e-05	0.308269	0.683	0.466	0.216534
CTSC	1.23262e-05	0.337514	0.951	0.81	0.231523
NFKB1	1.28099e-05	0.290548	0.309	0.132	0.240609
PABPC1	1.39871e-05	0.260746	0.959	0.893	0.26272
MIAT	1.434e-05	-0.357899	0.106	0.307	0.269348
VAV3	1.49037e-05	0.358416	0.447	0.239	0.279936
PDE4D	1.51336e-05	0.255183	0.276	0.107	0.284253
RAB5A	1.52622e-05	0.295585	0.48	0.27	0.28667
ATRX	1.58714e-05	0.355021	0.74	0.574	0.298112
GATA3	1.61074e-05	0.429775	0.634	0.433	0.302546
CCNI	1.63232e-05	0.26205	0.943	0.868	0.306599
LBR	1.67772e-05	0.310521	0.642	0.411	0.315127
RNF145	1.7061e-05	0.29433	0.577	0.359	0.320456
SLC4A7	1.7834e-05	0.315878	0.39	0.196	0.334977
AKIRIN2	1.79044e-05	0.341024	0.528	0.319	0.336298
ZNF292	1.83704e-05	0.296315	0.496	0.267	0.34505
TLK1	1.90068e-05	0.302479	0.683	0.46	0.357006
ANTXR2	1.93512e-05	0.265066	0.285	0.113	0.363473
PARP8	2.06471e-05	0.314334	0.293	0.123	0.387814
BIRC2	2.07837e-05	0.284994	0.398	0.206	0.390379
SYNE2	2.46068e-05	0.352744	0.683	0.512	0.46219
DUSP16	2.50135e-05	0.326188	0.382	0.19	0.469829
KDM5A	2.51542e-05	0.280267	0.423	0.227	0.472472
MT-ND2	2.57674e-05	-0.271048	1	0.994	0.483988
TNFRSF4	2.74379e-05	0.505608	0.911	0.788	0.515367
AHSA1	2.84346e-05	-0.347312	0.309	0.497	0.534087
SPN	3.19095e-05	0.264384	0.512	0.294	0.599356
CTSD	3.38935e-05	-0.340519	0.675	0.785	0.636621
EFCAB14	3.61644e-05	0.25807	0.398	0.206	0.679275
NKTR	3.88908e-05	0.264247	0.618	0.429	0.730485
DNAJC3	4.23969e-05	0.260431	0.431	0.224	0.796341
CD74	4.38767e-05	-0.32897	0.976	0.994	0.824136
FNBP4	4.42985e-05	0.263957	0.496	0.282	0.832058
MT1X	4.46407e-05	-0.510288	0.341	0.494	0.838485
RBM5	4.61216e-05	0.273962	0.415	0.224	0.866302
SYNRG	4.96506e-05	0.274003	0.537	0.319	0.932587
ARID5B	5.03221e-05	0.322631	0.837	0.712	0.945201
PIP4K2A	5.05153e-05	0.262811	0.374	0.181	0.948829
HLA-DQB1	5.06501e-05	0.312662	0.618	0.39	0.951361
ITGA4	5.23061e-05	0.391897	0.683	0.525	0.982465
GPX4	5.62772e-05	-0.310966	0.699	0.748	1
PMAIP1	5.68554e-05	0.329778	0.797	0.592	1
HMGB2	6.08635e-05	0.365192	0.756	0.592	1
CD82	6.3201e-05	-0.381299	0.407	0.564	1
EML4	6.56164e-05	0.317831	0.634	0.436	1
S100A11	6.5813e-05	-0.257525	0.886	0.917	1
XIST	6.6409e-05	0.300667	0.78	0.613	1
PCM1	7.4483e-05	0.311785	0.496	0.291	1
SRSF11	8.20502e-05	0.275721	0.724	0.549	1
EIF3A	8.33894e-05	0.268236	0.675	0.485	1
HNRNPD	8.46011e-05	0.267222	0.626	0.402	1
AKAP13	8.83652e-05	0.300775	0.683	0.491	1
JUND	9.05138e-05	0.258546	0.585	0.374	1
OSBPL8	9.40861e-05	0.271392	0.545	0.334	1
ASH1L	9.50179e-05	0.280828	0.504	0.291	1
MIER1	9.88369e-05	0.329188	0.447	0.267	1
HNRNPR	0.000100396	0.255839	0.699	0.5	1
SRRM2	0.000101804	0.31437	0.659	0.46	1
MAST4	0.000107078	0.310568	0.415	0.218	1
GADD45A	0.000109066	0.41429	0.667	0.494	1
CAST	0.000113491	0.305162	0.715	0.546	1
SEC11C	0.000114192	-0.2613	0.52	0.641	1
FOXP1	0.000127988	0.251092	0.455	0.267	1
MACF1	0.000129676	0.353024	0.431	0.279	1
SH3BGRL	0.000136329	0.257547	0.837	0.666	1
UBALD2	0.000136853	0.259036	0.431	0.245	1
POLR1D	0.000140668	0.296305	0.65	0.439	1
GPR171	0.000146898	0.577424	0.301	0.16	1
YY1	0.000156167	0.259138	0.561	0.359	1
IFITM1	0.000158359	-0.370691	0.415	0.567	1
TNFRSF1B	0.000167231	0.269513	0.87	0.712	1
RHOH	0.000174891	0.277611	0.829	0.632	1
THRAP3	0.000181417	0.267564	0.699	0.5	1
NAP1L4	0.000185017	0.261798	0.659	0.479	1
MRPS6	0.000188	-0.285553	0.52	0.666	1
MRPL51	0.000191898	-0.308	0.512	0.653	1
UGCG	0.000192611	0.254631	0.317	0.15	1
CLDND1	0.000196516	0.262391	0.52	0.319	1
ETV7	0.000201592	-0.286324	0.114	0.27	1
ALOX5AP	0.000202406	0.342236	0.488	0.31	1
PTEN	0.000203603	0.290171	0.358	0.196	1
TAX1BP1	0.000211218	0.262288	0.813	0.632	1
COA4	0.000219011	-0.299015	0.146	0.294	1
GLRX	0.000219176	0.33698	0.829	0.684	1
RPS26	0.000219808	-0.337117	0.976	0.963	1
SLAMF1	0.000221851	0.307724	0.618	0.426	1
RAP1A	0.000223267	0.261104	0.837	0.715	1
BCLAF1	0.000270127	0.321291	0.553	0.362	1
RGS2	0.000272119	-0.761798	0.317	0.488	1
PTPRA	0.00027711	0.260877	0.528	0.325	1
GIMAP7	0.00030239	-0.35639	0.22	0.399	1
RHBDD2	0.000311185	0.26109	0.65	0.445	1
GNG2	0.000330406	0.305303	0.659	0.445	1
LDHA	0.000350223	-0.26333	0.911	0.917	1
PSME2	0.000351628	-0.280002	0.797	0.856	1
CACYBP	0.000378589	-0.316676	0.634	0.755	1
BDP1	0.000405103	0.283945	0.447	0.279	1
PPM1G	0.000407358	0.258802	0.797	0.601	1
PCSK7	0.000440317	0.275255	0.553	0.362	1
ZFAND5	0.000443081	0.299348	0.585	0.383	1
RAB9A	0.000459227	0.279664	0.431	0.258	1
ZBTB38	0.00048339	0.280071	0.691	0.515	1
SLFN5	0.00049271	0.271931	0.569	0.383	1
TANK	0.000495591	0.280114	0.707	0.537	1
TAOK3	0.000543965	0.302727	0.569	0.387	1
TGOLN2	0.000562369	0.270154	0.528	0.35	1
DNAJA1	0.000589654	-0.333581	0.593	0.733	1
2020-09-06	0.00059081	0.266987	0.756	0.638	1
C14orf119	0.000626411	-0.278518	0.325	0.451	1
PKM	0.000730032	-0.381617	0.862	0.883	1
RPSAP58	0.000741613	0.258171	0.504	0.35	1
ENO1	0.000743406	-0.250645	0.967	0.951	1
CFLAR	0.000764642	0.335895	0.756	0.564	1
MZB1	0.000796469	-0.306163	0.171	0.325	1
FGL2	0.000872498	0.252631	0.293	0.15	1
SAMHD1	0.000880973	0.250583	0.512	0.347	1
HSPD1	0.000902521	-0.322475	0.65	0.724	1
ZFP36L1	0.00107001	-0.410213	0.602	0.684	1
C12orf57	0.00107877	-0.266999	0.715	0.81	1
ZC3HAV1	0.00110558	0.27589	0.488	0.337	1
PCBD1	0.00122712	-0.251308	0.163	0.294	1
PTPN1	0.00125868	0.260847	0.512	0.34	1
LAG3	0.00147352	-0.56121	0.163	0.285	1
AC006129.2	0.00154305	-0.312694	0.146	0.282	1
TUBA1B	0.00160609	-0.310188	0.528	0.66	1
C11orf31	0.00164589	-0.252215	0.569	0.653	1
ARID5A	0.0016684	-0.314443	0.415	0.558	1
GNPTAB	0.00169305	0.275056	0.463	0.322	1
GZMB	0.00172499	-0.38802	0.317	0.463	1
RP11-796E2.4	0.00193176	-0.318409	0.236	0.38	1
RNF181	0.00199546	-0.252881	0.488	0.552	1
PPP2R5C	0.0020244	0.269172	0.553	0.399	1
NDUFS8	0.00226086	-0.25974	0.512	0.598	1
LY6E	0.0023333	-0.28564	0.797	0.825	1
ZBTB8OS	0.00237581	-0.304523	0.236	0.353	1
FYB	0.00268063	0.262999	0.821	0.675	1
TGFB1	0.00276373	0.275312	0.407	0.273	1
RBPJ	0.0033866	0.264526	0.683	0.574	1
ARL4C	0.0034787	0.259651	0.545	0.393	1
SKIL	0.00361122	0.289466	0.325	0.206	1
BIRC3	0.00401476	0.356673	0.894	0.813	1
SCGB2A1	0.00463517	0.318739	0.341	0.227	1
CYLD	0.00573269	0.320362	0.472	0.347	1
TYMP	0.00588412	-0.336766	0.626	0.69	1
SYNGR2	0.00655934	-0.403264	0.472	0.546	1
CSF1	0.00725393	-0.264238	0.171	0.285	1
SLPI	0.00746459	0.274851	0.333	0.221	1
CDK2AP2	0.00869752	-0.277449	0.382	0.466	1
PTPN6	0.00942012	-0.299699	0.276	0.387	1
TNFRSF9	0.00967925	0.323654	0.577	0.454	1

## Sheet: CD8 T.Tumor vs Para.DEGs
gene	p value	logFC	pct.1	pct.2	p value_adj
FTL	2.03189e-259	-1.02977	0.957	0.998	3.81651e-255
HSPA1B	5.60478e-207	-2.30554	0.326	0.874	1.05275e-202
HSPA1A	4.51834e-192	-2.23429	0.39	0.878	8.48681e-188
PTPRC	6.9955e-171	0.718772	1	0.973	1.31396e-166
DNAJB1	2.07691e-165	-1.49072	0.602	0.913	3.90107e-161
LCP1	1.15745e-162	0.975821	0.953	0.689	2.17404e-158
APOE	2.38977e-151	-1.10399	0.065	0.66	4.4887e-147
PIK3R1	8.62452e-145	1.19147	0.806	0.36	1.61994e-140
GZMB	3.54921e-136	-1.02677	0.706	0.946	6.66647e-132
CTSW	2.15284e-130	0.881596	0.856	0.333	4.04367e-126
HSPB1	4.01842e-125	-1.09089	0.67	0.894	7.54779e-121
SFRP4	6.74976e-125	0.816774	0.339	0.014	1.26781e-120
HSPA8	6.60132e-123	-0.816078	0.901	0.965	1.23993e-118
RGS2	1.29724e-114	-1.41625	0.445	0.802	2.4366e-110
APOC1	2.43929e-114	-0.952458	0.026	0.528	4.58172e-110
HSP90AA1	2.83746e-106	-0.906826	0.97	0.98	5.32959e-102
HSPE1	3.15066e-102	-0.951431	0.674	0.888	5.91788e-98
SPP1	6.88416e-99	-0.908278	0.091	0.56	1.29305e-94
FAM118A	3.58532e-93	0.658821	0.554	0.166	6.73431e-89
ETS1	3.91819e-91	0.725828	0.808	0.499	7.35954e-87
UBC	1.43843e-90	-0.691506	0.978	0.988	2.70181e-86
UBB	2.46054e-87	-0.517709	0.977	0.988	4.62163e-83
RPS10	6.65203e-87	0.449353	0.997	0.922	1.24945e-82
FAM129A	1.75224e-86	0.622648	0.444	0.105	3.29123e-82
CD7	1.05129e-80	-0.570495	0.889	0.967	1.97464e-76
IL7R	1.47857e-79	1.32018	0.363	0.071	2.7772e-75
IFNG	7.14966e-79	-1.27913	0.299	0.673	1.34292e-74
HLA-DQA2	2.6806e-78	0.566378	0.328	0.054	5.03497e-74
RHOB	1.01985e-76	-1.14403	0.12	0.5	1.91559e-72
CXCL13	8.59685e-75	-1.62522	0.027	0.4	1.61475e-70
ATF7IP	3.90998e-74	0.643039	0.611	0.262	7.34412e-70
FTH1	7.98499e-73	-0.661523	1	1	1.49982e-68
ARAP2	3.65392e-71	0.606871	0.585	0.24	6.86315e-67
AIM1	5.57857e-70	0.545849	0.512	0.158	1.04782e-65
HSPA6	8.96524e-70	-1.91497	0.078	0.442	1.68394e-65
MT-ND3	1.86255e-69	-0.5181	0.975	0.981	3.49843e-65
JUN	2.84293e-69	-1.01086	0.784	0.895	5.33988e-65
KIAA1551	3.08705e-69	0.671221	0.768	0.477	5.7984e-65
AHNAK	6.77603e-67	0.617165	0.518	0.198	1.27274e-62
DUSP1	7.58104e-63	-0.999633	0.805	0.884	1.42395e-58
ZFP36L2	1.39062e-60	0.444472	0.982	0.877	2.612e-56
LYAR	2.45997e-59	0.528772	0.534	0.204	4.62057e-55
RNF19A	1.1674e-58	0.646007	0.672	0.382	2.19273e-54
HRASLS2	1.39457e-57	-0.60147	0.011	0.304	2.61943e-53
CKLF	2.97095e-57	-0.576219	0.776	0.879	5.58033e-53
KLRC1	3.24063e-57	-0.831429	0.24	0.603	6.08687e-53
ITGA4	6.39411e-57	0.579061	0.551	0.247	1.20101e-52
EML4	1.46408e-54	0.497517	0.677	0.35	2.74998e-50
CTSD	1.76967e-54	-0.573964	0.724	0.81	3.32397e-50
PDCD1	2.90346e-54	-0.744396	0.225	0.545	5.45357e-50
SLFN5	3.05246e-54	0.561175	0.571	0.279	5.73343e-50
PDE3B	9.73855e-54	0.450158	0.31	0.076	1.82919e-49
ACTG1	1.39731e-53	0.39598	0.995	0.958	2.62457e-49
PARP8	2.99411e-53	0.474368	0.659	0.341	5.62384e-49
CAMK4	2.39996e-52	0.447775	0.396	0.129	4.50785e-48
VPS13C	4.82536e-52	0.506675	0.515	0.228	9.06348e-48
SLC38A1	4.88345e-50	0.514176	0.571	0.286	9.17258e-46
LAG3	7.99607e-50	-0.679347	0.562	0.726	1.5019e-45
AC006129.4	8.17931e-50	-0.790492	0.122	0.425	1.53632e-45
IQGAP2	2.75851e-49	0.453946	0.398	0.137	5.18131e-45
MAPK1	3.25635e-49	0.502036	0.457	0.189	6.11641e-45
SMCHD1	6.28107e-49	0.532389	0.688	0.421	1.17977e-44
DDX39B	1.1144e-48	0.456966	0.444	0.176	2.09318e-44
ID3	1.39327e-48	-0.85453	0.107	0.394	2.61698e-44
YWHAZ	1.87479e-48	0.429936	0.852	0.657	3.52142e-44
SF3B1	2.55834e-48	0.476494	0.764	0.502	4.80532e-44
HIST1H1E	5.82357e-48	0.474766	0.349	0.112	1.09384e-43
MATK	1.45495e-47	0.500034	0.468	0.205	2.73283e-43
CSF1	2.36569e-47	-0.719489	0.117	0.411	4.44348e-43
MACF1	4.23701e-47	0.510419	0.536	0.26	7.95839e-43
KRT86	4.50867e-47	-0.816614	0.12	0.406	8.46864e-43
ANXA1	6.14189e-47	0.326169	0.922	0.658	1.15363e-42
ID2	9.30836e-47	-0.507083	0.952	0.972	1.74839e-42
AOAH	1.77559e-46	0.446501	0.413	0.147	3.33508e-42
IFI16	2.46639e-46	0.461108	0.905	0.76	4.63262e-42
FRMD4B	2.65717e-46	0.530819	0.313	0.091	4.99096e-42
2020-09-06	2.90409e-46	0.470189	0.657	0.395	5.45475e-42
TLN1	3.75668e-46	0.492806	0.632	0.375	7.05616e-42
HIST1H1D	1.17881e-45	0.472663	0.407	0.153	2.21416e-41
HLA-B	2.36737e-45	-0.320334	1	1	4.44664e-41
NCL	3.41653e-45	0.431741	0.828	0.627	6.41727e-41
RPS26	4.53718e-45	-0.557274	0.907	0.956	8.52218e-41
EMB	4.69934e-45	0.476366	0.721	0.472	8.82677e-41
RPL14	4.15474e-44	0.287199	0.996	0.981	7.80385e-40
DNAJB4	1.81324e-43	-0.779685	0.076	0.332	3.40581e-39
SLC4A7	4.27113e-43	0.448406	0.397	0.156	8.02246e-39
SMAP2	1.42069e-42	0.458145	0.481	0.212	2.66848e-38
TOP2B	1.56851e-42	0.397654	0.367	0.132	2.94614e-38
GZMK	3.21031e-42	0.572811	0.647	0.36	6.02992e-38
CD44	4.07931e-42	0.44825	0.801	0.566	7.66217e-38
DDX17	7.24078e-42	0.440659	0.685	0.431	1.36004e-37
SUB1	7.31124e-42	0.420186	0.944	0.872	1.37327e-37
UTRN	1.4905e-41	0.426491	0.418	0.169	2.7996e-37
GPR171	1.9319e-41	0.539011	0.727	0.49	3.62869e-37
MT-ND2	2.20243e-41	-0.412821	0.984	0.984	4.13683e-37
HNRNPU	3.47517e-41	0.398148	0.808	0.606	6.52742e-37
PRKX	9.11209e-41	0.428623	0.378	0.147	1.71152e-36
C1QB	2.00703e-40	-0.424802	0.036	0.271	3.7698e-36
PTP4A2	4.64482e-40	0.423908	0.637	0.379	8.72436e-36
LAIR2	5.31352e-40	-0.551363	0.04	0.281	9.98038e-36
TMEM2	5.99386e-40	0.533053	0.527	0.276	1.12583e-35
RPS6	1.47186e-39	0.255512	1	1	2.76459e-35
ANKRD11	1.88629e-38	0.428474	0.451	0.207	3.54302e-34
N4BP2	9.06409e-38	0.367092	0.269	0.081	1.70251e-33
MT-ATP6	2.69211e-37	-0.291175	0.996	0.994	5.05659e-33
PRRC2B	2.80635e-37	0.345339	0.297	0.097	5.27117e-33
MT-CYB	2.89599e-37	-0.303983	0.989	0.993	5.43954e-33
PDE7A	3.55604e-37	0.376013	0.342	0.124	6.6793e-33
KLRG1	3.5653e-37	0.443898	0.253	0.071	6.6967e-33
HNRNPD	4.27236e-37	0.417336	0.554	0.307	8.02478e-33
SMARCA5	6.03631e-37	0.376573	0.541	0.291	1.1338e-32
CDC42	6.80785e-37	0.334404	0.896	0.737	1.27872e-32
RNF125	1.19168e-36	0.436756	0.456	0.221	2.23833e-32
APOBEC3H	1.62228e-36	0.428294	0.353	0.138	3.04714e-32
WNK1	2.47858e-36	0.414332	0.554	0.314	4.65552e-32
HSP90AB1	2.63099e-36	-0.468483	0.846	0.916	4.94178e-32
C1QA	2.79942e-36	-0.382699	0.043	0.266	5.25815e-32
COTL1	5.85176e-36	0.498863	0.896	0.798	1.09914e-31
GSPT1	6.01578e-36	0.416921	0.558	0.292	1.12994e-31
MYH9	7.75094e-36	0.39524	0.615	0.366	1.45586e-31
FKBP5	1.0151e-35	0.465386	0.415	0.182	1.90666e-31
MALT1	1.217e-35	0.30559	0.26	0.075	2.2859e-31
NIN	3.27447e-35	0.383392	0.433	0.202	6.15043e-31
CCL3L1	5.18777e-35	-0.637687	0.06	0.29	9.74419e-31
JAK1	6.82224e-35	0.366382	0.799	0.6	1.28142e-30
SYNE2	7.74327e-35	0.47113	0.644	0.421	1.45442e-30
N4BP2L2	9.35762e-35	0.35701	0.809	0.596	1.75764e-30
CD63	1.14508e-34	-0.394804	0.846	0.887	2.1508e-30
TC2N	1.38722e-34	0.386681	0.474	0.224	2.60561e-30
STAT4	1.65934e-34	0.386019	0.499	0.246	3.11675e-30
KMT2C	2.5709e-34	0.369684	0.319	0.118	4.82893e-30
PSAP	9.30976e-34	-0.411812	0.508	0.698	1.74865e-29
CACYBP	1.40996e-33	-0.524702	0.416	0.623	2.64834e-29
PTPRCAP	3.52388e-33	-0.331771	0.985	0.951	6.61891e-29
CEP350	6.90967e-33	0.345734	0.354	0.147	1.29784e-28
CXCR6	8.03779e-33	-0.531195	0.549	0.727	1.50974e-28
ITGB1	8.96761e-33	0.47277	0.617	0.402	1.68439e-28
ANKRD36C	1.75166e-32	0.361707	0.35	0.148	3.29014e-28
MZT2A	2.31191e-32	0.386902	0.721	0.516	4.34246e-28
ATRX	3.16019e-32	0.427727	0.602	0.395	5.93579e-28
MAP4	3.98687e-32	0.371187	0.429	0.21	7.48854e-28
FNBP1	4.34019e-32	0.356665	0.764	0.58	8.15217e-28
CD82	6.85002e-32	-0.466775	0.187	0.433	1.28664e-27
GMFG	9.52694e-32	0.347749	0.896	0.737	1.78945e-27
TIGIT	1.25256e-31	-0.493747	0.512	0.683	2.35268e-27
GLIPR2	1.92446e-31	0.405944	0.523	0.295	3.6147e-27
ARPC5	2.0149e-31	0.363229	0.786	0.61	3.78459e-27
MYL12B	4.96992e-31	0.257958	0.978	0.938	9.33499e-27
ADA	5.73221e-31	0.328485	0.334	0.132	1.07668e-26
ARGLU1	5.92045e-31	0.35323	0.768	0.598	1.11204e-26
CCSER2	7.86635e-31	0.399502	0.536	0.314	1.47754e-26
TMEM66	8.55339e-31	0.291886	0.962	0.895	1.60658e-26
CORO1A	9.37799e-31	0.321348	0.975	0.883	1.76147e-26
LINC00152	1.10898e-30	-0.460298	0.662	0.802	2.08299e-26
TPI1	1.52218e-30	-0.341564	0.839	0.883	2.85912e-26
SYTL3	1.70276e-30	0.328398	0.663	0.423	3.19829e-26
GPR183	4.0053e-30	0.48252	0.374	0.167	7.52315e-26
GPX1	5.25604e-30	-0.452207	0.383	0.598	9.87242e-26
STIM2	6.08297e-30	0.355247	0.331	0.139	1.14256e-25
GZMA	6.92075e-30	-0.318292	0.915	0.983	1.29992e-25
CD27	7.65105e-30	-0.458444	0.453	0.655	1.4371e-25
S100A10	8.35423e-30	0.350221	0.845	0.709	1.56917e-25
DYNLL1	1.53071e-29	-0.352815	0.769	0.86	2.87513e-25
DNAJA1	1.74552e-29	-0.562542	0.637	0.762	3.27862e-25
SKIL	1.78438e-29	0.330454	0.401	0.185	3.3516e-25
EPB41	2.21012e-29	0.312894	0.264	0.094	4.15128e-25
PDE4B	6.25462e-29	0.358552	0.484	0.26	1.17481e-24
BIRC6	1.03571e-28	0.316296	0.341	0.146	1.94538e-24
ZBTB38	1.1739e-28	0.381875	0.456	0.252	2.20494e-24
XRN1	1.26349e-28	0.359239	0.47	0.256	2.37322e-24
ITK	1.95702e-28	0.318972	0.511	0.278	3.67588e-24
ACTB	2.77803e-28	0.280502	1	1	5.21797e-24
FYN	3.68921e-28	0.383409	0.687	0.495	6.92944e-24
MYL12A	3.73987e-28	0.263409	0.993	0.965	7.02459e-24
RASA2	7.43712e-28	0.351829	0.379	0.181	1.39692e-23
MZT2B	9.35889e-28	0.316464	0.755	0.541	1.75788e-23
HP1BP3	1.08287e-27	0.356948	0.599	0.374	2.03396e-23
CAPG	1.14194e-27	-0.406648	0.484	0.68	2.1449e-23
ATP2B1	1.73405e-27	0.292235	0.262	0.094	3.25706e-23
CD81	1.78901e-27	0.322935	0.396	0.188	3.3603e-23
CST3	1.80227e-27	-0.430204	0.21	0.42	3.3852e-23
ANKRD44	1.83292e-27	0.352855	0.429	0.221	3.44278e-23
SPRY1	5.71845e-27	-0.528055	0.202	0.422	1.0741e-22
CDKN2C	7.16121e-27	-0.477702	0.093	0.286	1.34509e-22
ATM	1.01775e-26	0.373389	0.35	0.169	1.91164e-22
ORMDL3	1.26221e-26	-0.420365	0.174	0.381	2.37081e-22
SLK	1.40293e-26	0.305393	0.28	0.111	2.63512e-22
CAST	1.6679e-26	0.32066	0.606	0.396	3.13282e-22
IFITM2	1.77167e-26	-0.359238	0.82	0.892	3.32773e-22
USP34	2.01057e-26	0.301675	0.346	0.158	3.77646e-22
XIST	2.28659e-26	0.350094	0.648	0.457	4.29491e-22
KLF13	2.98869e-26	0.294124	0.287	0.117	5.61366e-22
PIP4K2A	3.37571e-26	0.341316	0.526	0.312	6.3406e-22
SAMD3	4.42908e-26	0.349019	0.547	0.34	8.31915e-22
SACM1L	4.90214e-26	0.295473	0.36	0.168	9.20768e-22
SMEK1	5.81799e-26	0.299124	0.332	0.147	1.09279e-21
FCER1G	6.41516e-26	-0.370377	0.137	0.356	1.20496e-21
GLIPR1	6.76592e-26	0.36155	0.573	0.364	1.27084e-21
PPP1R15A	7.60864e-26	-0.563851	0.466	0.632	1.42913e-21
MBNL1	8.84629e-26	0.321153	0.662	0.454	1.6616e-21
CTSB	9.9855e-26	-0.419211	0.284	0.49	1.87558e-21
EPS15	1.03343e-25	0.297881	0.385	0.186	1.9411e-21
CAPZA1	1.09038e-25	0.273364	0.725	0.515	2.04805e-21
LINC-PINT	1.14175e-25	0.313981	0.415	0.207	2.14454e-21
PICALM	1.89402e-25	0.277728	0.273	0.11	3.55754e-21
TGFB1	2.32099e-25	0.321683	0.427	0.223	4.35951e-21
CNOT6L	2.69776e-25	0.418082	0.614	0.436	5.0672e-21
ITM2C	4.64272e-25	0.430359	0.614	0.433	8.72041e-21
ANKRD35	7.06734e-25	-0.33823	0.084	0.271	1.32746e-20
UBE2F	7.47399e-25	-0.458274	0.135	0.334	1.40384e-20
VPS13A	7.4977e-25	0.27866	0.254	0.098	1.40829e-20
PHYKPL	1.27389e-24	-0.539746	0.31	0.49	2.39274e-20
STK17B	1.29277e-24	0.28317	0.835	0.69	2.42821e-20
TBC1D4	1.57811e-24	-0.367051	0.117	0.315	2.96416e-20
CXCR4	1.71116e-24	0.253589	0.963	0.924	3.21408e-20
DOCK10	2.91068e-24	0.310492	0.409	0.213	5.46713e-20
SIRPG	3.14178e-24	-0.38323	0.217	0.433	5.9012e-20
TRAT1	3.52637e-24	0.446801	0.335	0.164	6.62359e-20
CCL3	3.78768e-24	-0.499654	0.4	0.6	7.11441e-20
PTPN6	4.89823e-24	-0.490514	0.287	0.479	9.20035e-20
SFPQ	6.27994e-24	0.347965	0.663	0.471	1.17956e-19
TMF1	9.09614e-24	0.309194	0.426	0.231	1.70853e-19
AC092580.4	1.19977e-23	-0.349405	0.766	0.864	2.25353e-19
EFHD2	1.25817e-23	0.298105	0.315	0.145	2.36321e-19
SAMHD1	1.39678e-23	0.308588	0.354	0.175	2.62358e-19
HAVCR2	1.5144e-23	-0.477224	0.258	0.464	2.84449e-19
MYCBP2	1.6888e-23	0.349759	0.448	0.263	3.17207e-19
CD9	1.73991e-23	-0.369073	0.158	0.361	3.26807e-19
HELZ	2.50016e-23	0.285372	0.339	0.162	4.69605e-19
IQGAP1	2.57874e-23	0.308438	0.673	0.48	4.84364e-19
NIPBL	2.74423e-23	0.338099	0.393	0.213	5.1545e-19
MBP	3.48752e-23	0.311518	0.47	0.278	6.55061e-19
ATP11B	3.91337e-23	0.272131	0.288	0.125	7.35049e-19
GOLGB1	4.52601e-23	0.315499	0.38	0.198	8.50121e-19
PAK2	4.59172e-23	0.319801	0.523	0.328	8.62464e-19
PPAP2A	6.17431e-23	-0.432739	0.129	0.32	1.15972e-18
HERC1	7.60554e-23	0.258903	0.294	0.129	1.42855e-18
C1orf63	9.18928e-23	0.290251	0.749	0.583	1.72602e-18
DIAPH1	9.60643e-23	0.292243	0.394	0.208	1.80438e-18
HLA-DRB5	1.02559e-22	0.45429	0.635	0.481	1.92638e-18
TMOD3	1.11724e-22	0.305789	0.422	0.233	2.09851e-18
MIAT	1.26547e-22	-0.368693	0.128	0.316	2.37693e-18
TRIP12	1.48696e-22	0.272162	0.287	0.129	2.79295e-18
ZCCHC11	1.70575e-22	0.30703	0.39	0.207	3.20392e-18
RAB3GAP1	1.71612e-22	-0.413392	0.141	0.336	3.22338e-18
PRRC2C	1.91688e-22	0.319928	0.736	0.575	3.60048e-18
FASLG	2.04474e-22	-0.390724	0.191	0.385	3.84064e-18
TSC22D1	2.29308e-22	-0.594417	0.117	0.285	4.3071e-18
ZFAND2A	2.45863e-22	-0.553015	0.092	0.259	4.61805e-18
AC002331.1	3.47959e-22	-0.387176	0.148	0.354	6.53571e-18
CAB39	4.09258e-22	0.26645	0.301	0.138	7.68708e-18
REL	5.23224e-22	0.293814	0.516	0.307	9.82772e-18
SMARCA2	5.28026e-22	0.25489	0.277	0.123	9.91792e-18
CYTH4	5.80273e-22	-0.377934	0.183	0.379	1.08993e-17
AKAP13	6.75775e-22	0.314999	0.695	0.524	1.26931e-17
BPTF	7.80873e-22	0.331617	0.416	0.239	1.46671e-17
HLA-DQB1	8.0276e-22	0.335828	0.512	0.315	1.50782e-17
PHF3	8.10376e-22	0.308624	0.361	0.189	1.52213e-17
HERC2	1.28363e-21	0.271648	0.253	0.104	2.41104e-17
BST2	1.36363e-21	-0.347483	0.51	0.658	2.56131e-17
HSPH1	1.50466e-21	-0.494826	0.284	0.467	2.82621e-17
RBL2	1.71016e-21	0.270159	0.501	0.295	3.2122e-17
TNRC6B	1.9368e-21	0.31328	0.499	0.311	3.63789e-17
RHOC	2.10072e-21	-0.336006	0.54	0.679	3.94577e-17
ARHGAP15	2.896e-21	0.29908	0.547	0.364	5.43956e-17
SCAF11	4.53353e-21	0.296518	0.604	0.407	8.51532e-17
CARS	4.7145e-21	-0.386604	0.151	0.336	8.85524e-17
SPOCK2	4.88794e-21	0.25911	0.523	0.307	9.18102e-17
NPC2	8.10366e-21	-0.35198	0.271	0.456	1.52211e-16
RALGAPA1	9.02956e-21	0.258946	0.271	0.116	1.69602e-16
SENP7	9.30773e-21	0.268916	0.283	0.128	1.74827e-16
BCLAF1	9.70256e-21	0.315993	0.574	0.391	1.82243e-16
SRRM2	1.03589e-20	0.289571	0.592	0.414	1.94572e-16
CCNH	1.45623e-20	0.280005	0.732	0.557	2.73525e-16
SMG1	1.67868e-20	0.273046	0.343	0.177	3.15307e-16
SERPINH1	1.68093e-20	-0.601688	0.129	0.288	3.15729e-16
HLA-DQA1	1.84759e-20	0.366227	0.371	0.201	3.47032e-16
CD69	2.09742e-20	-0.652577	0.942	0.929	3.93958e-16
SEC14L1	2.15589e-20	0.264065	0.316	0.151	4.04941e-16
CLECL1	2.18837e-20	-0.257668	0.115	0.302	4.11041e-16
H3F3B	2.22839e-20	-0.437431	0.992	0.998	4.18558e-16
ANKRD36	2.50477e-20	0.280548	0.383	0.21	4.70471e-16
SIT1	2.73957e-20	-0.356936	0.482	0.63	5.14573e-16
PRKDC	3.10949e-20	0.29347	0.345	0.181	5.84056e-16
RIF1	3.21097e-20	0.284349	0.304	0.15	6.03117e-16
ACTR3	3.29964e-20	0.27642	0.831	0.694	6.19772e-16
ADD3	3.77283e-20	0.252635	0.28	0.128	7.0865e-16
ATF3	3.81934e-20	-0.600531	0.173	0.337	7.17386e-16
STK17A	4.49311e-20	0.283053	0.861	0.777	8.43941e-16
NCOR1	7.03897e-20	0.284707	0.69	0.531	1.32213e-15
CCDC167	7.30066e-20	0.261741	0.413	0.236	1.37128e-15
HSPD1	1.15892e-19	-0.403087	0.503	0.648	2.1768e-15
ANP32B	1.16211e-19	0.290595	0.599	0.42	2.18279e-15
URI1	1.81491e-19	0.275131	0.306	0.155	3.40894e-15
SETD2	2.04943e-19	0.269294	0.312	0.156	3.84945e-15
ZEB2	2.52729e-19	0.274475	0.305	0.151	4.74701e-15
CHD3	2.85687e-19	0.274634	0.257	0.117	5.36606e-15
CYCS	3.56704e-19	-0.399667	0.603	0.736	6.69998e-15
SAMD9	3.60069e-19	0.274182	0.455	0.28	6.76317e-15
CMIP	3.81906e-19	0.259634	0.32	0.163	7.17335e-15
FNBP4	6.1994e-19	0.273388	0.416	0.248	1.16443e-14
MIF	7.06088e-19	-0.332089	0.673	0.775	1.32624e-14
GPRIN3	9.21196e-19	0.301302	0.402	0.234	1.73028e-14
DOCK2	1.31227e-18	0.267479	0.293	0.145	2.46483e-14
PRF1	1.32145e-18	-0.348558	0.771	0.817	2.48207e-14
DNMT1	1.45156e-18	0.311094	0.387	0.227	2.72647e-14
TNFRSF18	1.58794e-18	-0.258031	0.144	0.327	2.98264e-14
CYLD	1.71495e-18	0.283778	0.478	0.298	3.2212e-14
KLF6	1.9466e-18	-0.439981	0.742	0.807	3.6563e-14
PARP1	2.1547e-18	0.281744	0.552	0.391	4.04718e-14
RB1CC1	2.18836e-18	0.259963	0.295	0.148	4.11039e-14
XRCC5	2.36141e-18	0.276472	0.706	0.555	4.43543e-14
BATF	2.38817e-18	-0.36028	0.234	0.418	4.48569e-14
HTATSF1	2.49495e-18	0.257866	0.33	0.175	4.68626e-14
PDCD4	2.59653e-18	0.251263	0.668	0.5	4.87707e-14
CCNL1	2.77756e-18	0.258826	0.687	0.519	5.2171e-14
PLEKHF1	3.88228e-18	-0.333007	0.155	0.326	7.29209e-14
AC006129.2	3.90204e-18	-0.386096	0.179	0.342	7.32919e-14
PYHIN1	4.70041e-18	0.32083	0.629	0.475	8.82879e-14
RSRC2	4.89775e-18	0.257918	0.69	0.521	9.19945e-14
IKZF1	4.98687e-18	0.273184	0.496	0.324	9.36685e-14
SMC1A	4.99788e-18	0.293774	0.359	0.201	9.38752e-14
TSPYL2	7.65453e-18	-0.441491	0.338	0.5	1.43775e-13
JMJD1C	7.74075e-18	0.261709	0.408	0.239	1.45395e-13
SYTL2	8.74942e-18	0.282631	0.293	0.15	1.6434e-13
BIRC2	9.54492e-18	0.262036	0.39	0.224	1.79282e-13
RGS1	9.61382e-18	-0.394665	0.93	0.938	1.80576e-13
NKTR	1.17249e-17	0.264232	0.562	0.382	2.20228e-13
SETX	1.59565e-17	0.257626	0.345	0.191	2.9971e-13
TPR	1.62736e-17	0.26377	0.588	0.416	3.05667e-13
SLC38A2	1.91708e-17	0.273705	0.42	0.25	3.60086e-13
C12orf75	2.2471e-17	0.289659	0.651	0.487	4.22073e-13
IFNGR1	2.72685e-17	0.254534	0.367	0.203	5.12184e-13
IL2RB	2.80681e-17	-0.357649	0.43	0.573	5.27203e-13
CITED2	3.21498e-17	-0.648048	0.435	0.571	6.0387e-13
ARHGAP18	3.43585e-17	0.283242	0.371	0.217	6.45355e-13
AKNA	4.05829e-17	0.299447	0.573	0.412	7.62268e-13
UTS2	4.41199e-17	-0.286411	0.194	0.38	8.28704e-13
ILF3	4.74784e-17	0.26295	0.418	0.256	8.91786e-13
BAZ1A	5.40684e-17	0.284926	0.453	0.289	1.01557e-12
S100A4	5.89754e-17	0.25464	0.977	0.979	1.10774e-12
MGEA5	6.44e-17	0.25855	0.523	0.35	1.20962e-12
DEDD2	1.45883e-16	-0.358095	0.192	0.346	2.74012e-12
ASH1L	1.52106e-16	0.25968	0.338	0.194	2.85701e-12
IVNS1ABP	1.65506e-16	0.269698	0.504	0.33	3.10871e-12
IPCEF1	1.96531e-16	0.261202	0.326	0.18	3.69144e-12
GCC2	2.225e-16	0.285239	0.593	0.439	4.17922e-12
TYMP	2.53085e-16	-0.356633	0.345	0.504	4.7537e-12
TTC3	2.55052e-16	0.283497	0.404	0.252	4.79063e-12
SMC3	2.62488e-16	0.258327	0.475	0.324	4.93032e-12
DYNC1H1	2.65413e-16	0.258776	0.364	0.217	4.98526e-12
HOPX	2.96026e-16	-0.379927	0.696	0.741	5.56025e-12
SYNE1	3.28805e-16	0.262005	0.306	0.17	6.17594e-12
NAP1L1	4.1762e-16	0.252991	0.769	0.643	7.84416e-12
SH3KBP1	5.23656e-16	0.253196	0.607	0.446	9.83583e-12
TPM4	5.65212e-16	0.296406	0.613	0.474	1.06164e-11
KDM5A	6.7772e-16	0.257231	0.376	0.23	1.27296e-11
ANXA6	9.75873e-16	0.258976	0.665	0.516	1.83298e-11
TCEA1	1.79208e-15	0.250441	0.56	0.394	3.36606e-11
2020-09-09	2.37394e-15	0.268385	0.558	0.417	4.45896e-11
SCGB2A1	3.59374e-15	0.332226	0.36	0.227	6.75012e-11
GGA1	3.60272e-15	0.288725	0.346	0.208	6.76699e-11
DDX46	3.63134e-15	0.251396	0.548	0.396	6.82074e-11
PRDM1	4.0676e-15	0.266654	0.581	0.415	7.64018e-11
SYNGR2	4.91049e-15	-0.296666	0.188	0.344	9.22337e-11
DEK	6.48252e-15	0.261143	0.67	0.532	1.21761e-10
FAM3C	8.19976e-15	-0.334583	0.21	0.359	1.54016e-10
LGALS1	1.61844e-14	0.511132	0.784	0.8	3.03992e-10
ASXL2	2.68437e-14	0.256509	0.372	0.233	5.04206e-10
NKG7	3.664e-14	-0.315638	0.949	0.961	6.8821e-10
EIF3A	6.04837e-14	0.260192	0.523	0.376	1.13607e-09
H1FX	6.82352e-14	0.268612	0.477	0.321	1.28166e-09
SELK	1.54883e-13	-0.382638	0.585	0.695	2.90918e-09
TXNIP	2.04886e-13	0.286844	0.934	0.88	3.84837e-09
CTSA	2.35495e-13	-0.288574	0.36	0.503	4.4233e-09
ACP5	3.47455e-13	-0.255564	0.276	0.43	6.52625e-09
OSBPL8	3.55923e-13	0.251839	0.451	0.307	6.6853e-09
PHIP	4.0068e-13	0.254438	0.416	0.28	7.52597e-09
STMN1	4.37655e-13	0.379813	0.37	0.241	8.22047e-09
ZFP36L1	4.68389e-13	-0.367869	0.478	0.577	8.79776e-09
NBL1	4.76052e-13	-0.294672	0.126	0.256	8.94169e-09
NEAT1	5.028e-13	0.307753	0.791	0.698	9.44409e-09
TNIP3	5.91689e-13	0.294267	0.367	0.244	1.11137e-08
KLRD1	7.94768e-13	0.393866	0.615	0.531	1.49281e-08
TPST2	8.96766e-13	-0.280182	0.265	0.408	1.6844e-08
MYLIP	2.17354e-12	-0.354244	0.261	0.389	4.08255e-08
SURF4	3.71881e-12	-0.283309	0.397	0.521	6.98503e-08
IFITM1	5.6466e-12	-0.292211	0.492	0.596	1.0606e-07
PPP1R2	7.74299e-12	-0.328048	0.529	0.623	1.45437e-07
MCL1	1.04697e-11	-0.262205	0.74	0.822	1.96652e-07
ARF6	1.25974e-11	-0.336163	0.762	0.801	2.36617e-07
MT1X	1.54241e-11	-0.276219	0.35	0.488	2.89711e-07
BTG2	1.72726e-11	-0.444073	0.481	0.583	3.24431e-07
MTHFD2	2.0368e-11	-0.286288	0.262	0.385	3.82573e-07
ITGAE	2.62467e-11	-0.287513	0.383	0.495	4.92992e-07
ANKRD28	7.09167e-11	-0.294744	0.191	0.315	1.33203e-06
GYG1	7.56126e-11	0.295091	0.501	0.398	1.42023e-06
ROMO1	7.76062e-11	-0.26179	0.525	0.611	1.45768e-06
SERTAD1	1.03002e-10	-0.324496	0.239	0.351	1.93469e-06
AMICA1	1.43809e-10	-0.268735	0.418	0.535	2.70117e-06
ABI3	2.1869e-10	-0.281525	0.437	0.547	4.10766e-06
PRMT10	3.69556e-10	-0.407133	0.228	0.328	6.94136e-06
SOCS1	3.75294e-10	-0.314507	0.567	0.642	7.04914e-06
ITGA1	4.72504e-10	0.255586	0.57	0.457	8.87505e-06
CDK2AP2	6.72321e-10	-0.268807	0.413	0.522	1.26282e-05
PTP4A1	9.44339e-10	-0.422448	0.298	0.393	1.77375e-05
MRPL18	1.7815e-09	-0.266659	0.229	0.343	3.34619e-05
PELO	2.25373e-09	-0.263841	0.154	0.263	4.23318e-05
ARRDC3	2.26633e-09	-0.344923	0.264	0.366	4.25685e-05
PRNP	3.09969e-09	-0.265804	0.242	0.36	5.82215e-05
NUCB2	5.06309e-09	-0.270832	0.332	0.436	9.51e-05
C12orf57	5.42143e-09	-0.253212	0.505	0.594	0.000101831
CKS2	7.42277e-08	-0.351278	0.276	0.362	0.00139422
CLIC3	8.64598e-08	-0.28936	0.354	0.451	0.00162397
JUNB	5.6869e-07	-0.349968	0.887	0.905	0.0106817
BCAS2	1.44858e-06	-0.276409	0.35	0.429	0.0272086
SOCS3	2.02615e-06	-0.252387	0.194	0.277	0.0380573
SAT1	7.93185e-06	-0.40533	0.835	0.833	0.148984
KLRB1	0.000120457	-0.286566	0.386	0.472	1
XCL1	0.000169518	-0.272939	0.449	0.324	1
MAP3K8	0.000225635	-0.31965	0.22	0.271	1
GNLY	0.000751409	0.325264	0.479	0.389	1

## Sheet: NK-like.Tumor vs Para.DEGs
gene	p value	logFC	pct.1	pct.2	p value_adj
HSPA1B	1.40813e-88	-2.24769	0.218	0.772	2.64489e-84
HSPA1A	3.25121e-82	-2.16513	0.32	0.844	6.10675e-78
APOE	1.32251e-79	-0.895962	0.054	0.534	2.48406e-75
APOC1	7.37074e-77	-0.804427	0.021	0.435	1.38445e-72
SPP1	9.72046e-73	-0.999822	0.098	0.602	1.82579e-68
FTL	1.91971e-71	-0.889331	0.956	1	3.60578e-67
DNAJB1	1.30623e-68	-1.56409	0.404	0.864	2.4535e-64
C1QB	2.15703e-45	-0.437527	0.022	0.296	4.05155e-41
HSPA8	1.31322e-44	-0.802478	0.873	0.956	2.46662e-40
PTPRC	1.79094e-43	0.527172	0.994	0.986	3.36393e-39
HSP90AA1	3.48759e-41	-0.838818	0.912	0.976	6.55074e-37
RGS2	1.03974e-39	-1.20397	0.249	0.626	1.95294e-35
JUN	1.17216e-39	-1.32413	0.535	0.806	2.20167e-35
LCP1	1.38273e-39	0.590559	0.967	0.85	2.59719e-35
LAG3	6.59556e-38	-0.835965	0.132	0.483	1.23884e-33
GZMB	2.62578e-37	-0.916859	0.766	0.959	4.93199e-33
HSPA6	4.29071e-33	-1.53087	0.099	0.398	8.05925e-29
CTSW	6.36376e-31	0.576728	0.962	0.69	1.1953e-26
MIAT	7.90724e-31	-0.419079	0.046	0.289	1.48522e-26
KLRB1	1.25957e-29	0.600649	0.957	0.84	2.36585e-25
CD74	1.50806e-29	-0.689809	0.826	0.973	2.83258e-25
PIK3R1	9.63608e-29	0.780604	0.798	0.616	1.80994e-24
IFNG	1.96659e-28	-1.16043	0.197	0.51	3.69385e-24
ZFP36L2	2.82442e-28	0.490826	0.983	0.895	5.30511e-24
HSPE1	3.08781e-28	-0.78335	0.623	0.837	5.79984e-24
ETS1	2.87317e-25	0.560561	0.819	0.605	5.39667e-21
HSPB1	9.76767e-25	-0.836714	0.593	0.827	1.83466e-20
RHOB	2.55139e-24	-0.855859	0.137	0.395	4.79228e-20
ZNRF1	3.88008e-23	-0.377887	0.088	0.327	7.28795e-19
SOCS3	9.80106e-23	-0.513993	0.101	0.34	1.84093e-18
CD3D	2.42209e-21	-0.641703	0.195	0.48	4.54941e-17
BATF	6.57422e-21	-0.470513	0.145	0.398	1.23483e-16
RPS10	1.01464e-20	0.274937	0.995	0.976	1.9058e-16
CXCR6	1.33407e-20	-0.555343	0.19	0.466	2.50578e-16
KRT81	7.42178e-20	0.682777	0.623	0.344	1.39403e-15
MAPK1	7.64148e-20	0.526631	0.689	0.49	1.4353e-15
DNAJB4	2.39701e-19	-0.45822	0.074	0.272	4.5023e-15
DNAJA1	3.03578e-19	-0.575285	0.509	0.765	5.7021e-15
DYNLL1	7.55828e-19	-0.447951	0.736	0.881	1.41967e-14
MT2A	1.29567e-18	-0.572143	0.532	0.789	2.43365e-14
IFI16	1.51646e-18	0.394969	0.899	0.871	2.84836e-14
HLA-DRA	2.35688e-18	-0.580156	0.429	0.697	4.42692e-14
ARAP2	5.22835e-18	0.53979	0.565	0.327	9.82041e-14
ATF3	6.76674e-18	-0.666777	0.101	0.303	1.271e-13
UBB	3.01355e-17	-0.334874	0.986	0.997	5.66035e-13
KLRD1	3.58203e-17	0.423023	0.903	0.84	6.72813e-13
UBC	4.34989e-17	-0.541269	0.954	0.98	8.1704e-13
PTMS	7.60087e-17	-0.532959	0.32	0.571	1.42767e-12
ITGB1	8.25697e-17	0.452591	0.8	0.67	1.55091e-12
2020-09-07	1.01421e-16	0.316469	0.98	0.929	1.905e-12
TLN1	1.71301e-16	0.408488	0.732	0.537	3.21755e-12
SF3B1	2.0371e-16	0.399556	0.77	0.643	3.82629e-12
TSC22D1	2.06348e-16	-0.57343	0.142	0.347	3.87583e-12
KLRC1	2.20252e-16	0.530622	0.835	0.701	4.13699e-12
CACYBP	2.26448e-16	-0.409664	0.407	0.67	4.25338e-12
DUSP1	3.7932e-16	-0.742523	0.815	0.888	7.12476e-12
HLA-DRB1	4.6814e-16	-0.63887	0.407	0.643	8.79307e-12
KLF2	4.77183e-16	-0.557585	0.142	0.361	8.96292e-12
CTSB	3.58312e-15	-0.416575	0.214	0.452	6.73017e-11
STK17A	8.39034e-15	0.370312	0.903	0.847	1.57596e-10
CSF1	1.43216e-14	-0.338268	0.12	0.32	2.69002e-10
ID3	1.44546e-14	-0.509241	0.154	0.364	2.715e-10
PARP8	2.49901e-14	0.414521	0.585	0.371	4.69388e-10
HSPH1	4.63368e-14	-0.354417	0.233	0.456	8.70345e-10
TIMP1	6.29766e-14	-0.371142	0.214	0.435	1.18289e-09
XCL2	1.02202e-13	0.307822	0.874	0.694	1.91966e-09
GPX1	1.3526e-13	-0.453913	0.369	0.605	2.54058e-09
DDX17	1.57501e-13	0.378024	0.727	0.585	2.95834e-09
SRGN	1.84738e-13	0.290173	0.995	0.997	3.46994e-09
TXK	2.30834e-13	0.407527	0.668	0.483	4.33575e-09
AREG	3.05303e-13	0.682073	0.343	0.133	5.7345e-09
EVL	3.13052e-13	0.299232	0.968	0.935	5.88006e-09
CD96	3.21411e-13	0.312641	0.856	0.776	6.03707e-09
ITGA1	3.5617e-13	0.54055	0.658	0.503	6.68994e-09
MT1X	3.68979e-13	-0.33672	0.26	0.493	6.93053e-09
SCGB1D2	9.96757e-13	0.406405	0.301	0.095	1.87221e-08
GAPDH	1.19246e-12	-0.303212	0.998	1	2.2398e-08
STK17B	1.34678e-12	0.357604	0.808	0.68	2.52966e-08
AOAH	1.72202e-12	0.387295	0.561	0.374	3.23446e-08
CD81	1.81735e-12	0.384671	0.575	0.412	3.41352e-08
ELF1	1.90444e-12	0.3639	0.772	0.684	3.5771e-08
IVNS1ABP	2.18374e-12	0.414483	0.581	0.412	4.10171e-08
PSME2	2.89515e-12	-0.313087	0.737	0.878	5.43796e-08
STAT4	3.11156e-12	0.372261	0.494	0.296	5.84444e-08
PPP1R15A	3.17113e-12	-0.594668	0.495	0.704	5.95633e-08
SLC38A1	3.20863e-12	0.388997	0.569	0.401	6.02677e-08
CCL5	3.65434e-12	0.339073	0.967	0.963	6.86394e-08
JUNB	3.7323e-12	-0.480331	0.857	0.932	7.01039e-08
JAK1	4.84637e-12	0.322775	0.829	0.765	9.10293e-08
TOP2B	5.03841e-12	0.40713	0.47	0.289	9.46364e-08
HLA-DPA1	5.21682e-12	-0.435165	0.456	0.667	9.79876e-08
NPC2	5.4247e-12	-0.341136	0.325	0.568	1.01892e-07
NCOR1	5.94566e-12	0.365183	0.715	0.622	1.11677e-07
CCL4	6.04447e-12	0.326576	0.977	0.956	1.13533e-07
ORMDL3	6.30357e-12	-0.253628	0.12	0.299	1.184e-07
OXNAD1	1.00745e-11	0.440287	0.548	0.367	1.89229e-07
S100A6	1.26733e-11	-0.38861	0.843	0.925	2.38042e-07
MT-ND4L	2.24223e-11	0.333829	0.783	0.69	4.21159e-07
PTPN4	2.54052e-11	0.380519	0.577	0.429	4.77185e-07
SOD1	2.56236e-11	-0.272439	0.696	0.881	4.81287e-07
PRF1	3.10123e-11	-0.477301	0.915	0.946	5.82503e-07
IQGAP1	4.08167e-11	0.312898	0.711	0.605	7.66659e-07
SFRP4	5.86108e-11	0.592129	0.252	0.088	1.10089e-06
HSPD1	9.07298e-11	-0.419649	0.503	0.697	1.70418e-06
C1orf63	9.54967e-11	0.331135	0.762	0.663	1.79371e-06
CTSA	9.76664e-11	-0.437447	0.419	0.602	1.83447e-06
ATF7IP	1.06771e-10	0.412968	0.472	0.303	2.00548e-06
ZFAND2A	1.08241e-10	-0.292871	0.105	0.259	2.03309e-06
GNPTAB	1.11633e-10	0.395637	0.613	0.446	2.0968e-06
SPOCK2	1.26161e-10	-0.264897	0.128	0.296	2.36968e-06
PDCD4	1.48258e-10	0.32118	0.687	0.548	2.78472e-06
STT3B	1.70372e-10	0.372726	0.479	0.31	3.20009e-06
FCER1G	1.87267e-10	0.262601	0.915	0.82	3.51744e-06
TYMP	2.15908e-10	-0.350322	0.268	0.473	4.05539e-06
CST3	2.17834e-10	-0.341711	0.238	0.429	4.09158e-06
EML4	2.34843e-10	0.361894	0.518	0.344	4.41105e-06
SRSF5	2.4704e-10	0.267849	0.844	0.765	4.64015e-06
KLF6	2.62421e-10	-0.466492	0.742	0.85	4.92906e-06
LINC00152	2.65007e-10	-0.349289	0.5	0.673	4.97762e-06
HLA-DPB1	2.65838e-10	-0.433624	0.538	0.69	4.99324e-06
NCL	2.97884e-10	0.285873	0.851	0.806	5.59516e-06
FUS	3.05138e-10	0.323578	0.724	0.619	5.7314e-06
GBP5	3.49454e-10	-0.318849	0.233	0.425	6.56379e-06
HLA-B	3.94779e-10	-0.301731	1	1	7.41514e-06
RNF125	4.48576e-10	0.361181	0.464	0.296	8.4256e-06
FABP5	4.60115e-10	-0.441529	0.206	0.384	8.64233e-06
BPTF	4.6234e-10	0.41542	0.479	0.344	8.68413e-06
NAP1L4	5.32518e-10	0.356995	0.654	0.541	1.00023e-05
BTG2	6.52619e-10	-0.425255	0.425	0.626	1.22581e-05
PRDX1	6.64143e-10	-0.298271	0.391	0.605	1.24746e-05
FAM118A	8.7888e-10	0.360459	0.37	0.201	1.6508e-05
ARGLU1	1.16103e-09	0.261046	0.787	0.653	2.18076e-05
HELZ	1.23746e-09	0.345177	0.44	0.279	2.32431e-05
IQGAP2	1.25779e-09	0.385436	0.429	0.265	2.36251e-05
STAT3	1.54208e-09	-0.293199	0.389	0.582	2.89649e-05
SYTL3	1.82136e-09	0.447548	0.559	0.429	3.42106e-05
IL32	1.87752e-09	-0.398678	0.756	0.884	3.52654e-05
SMCHD1	1.91768e-09	0.352382	0.576	0.439	3.60198e-05
SLPI	1.92377e-09	0.385028	0.417	0.238	3.61343e-05
XCL1	2.0521e-09	0.306181	0.737	0.527	3.85446e-05
SLFN5	2.34863e-09	0.368109	0.604	0.48	4.41143e-05
CD320	2.71891e-09	-0.250819	0.197	0.378	5.10693e-05
YPEL1	3.0875e-09	0.313024	0.281	0.119	5.79924e-05
LGALS3	3.29059e-09	-0.384305	0.338	0.517	6.18072e-05
MATK	3.30274e-09	0.293725	0.811	0.697	6.20354e-05
CDK2AP2	4.48294e-09	-0.261988	0.442	0.643	8.4203e-05
CYCS	5.35323e-09	-0.363486	0.589	0.752	0.00010055
SETX	5.84425e-09	0.329565	0.369	0.214	0.000109773
CLDND1	6.0093e-09	0.374363	0.622	0.5	0.000112873
NCAM1	6.95155e-09	0.389931	0.408	0.245	0.000130571
EMB	7.38375e-09	0.282762	0.673	0.537	0.000138689
DHRS3	7.74088e-09	0.283695	0.369	0.197	0.000145397
ARHGAP9	1.10046e-08	0.330572	0.621	0.527	0.0002067
HLA-DQB1	1.20908e-08	-0.260909	0.175	0.34	0.000227102
HN1	1.32092e-08	-0.255331	0.417	0.605	0.000248108
MTHFD2	2.19299e-08	-0.260463	0.25	0.429	0.000411909
UTRN	2.25112e-08	0.362692	0.447	0.31	0.000422828
PPP3CA	2.32664e-08	0.333847	0.381	0.235	0.000437013
SON	2.35937e-08	0.25501	0.791	0.752	0.000443161
VPS13C	2.48112e-08	0.330158	0.512	0.388	0.000466028
PYHIN1	2.49487e-08	0.324744	0.674	0.575	0.000468612
PSAP	2.69048e-08	-0.263026	0.553	0.735	0.000505353
SAT1	2.80513e-08	-0.596155	0.787	0.85	0.000526887
HMGA1	2.821e-08	-0.259732	0.251	0.432	0.000529868
KRT86	3.77915e-08	0.3553	0.628	0.486	0.000709837
MEAF6	3.96401e-08	0.297786	0.522	0.395	0.00074456
CYTH4	4.04e-08	-0.262767	0.252	0.435	0.000758834
SYNGR1	4.54011e-08	0.299358	0.339	0.177	0.000852768
ATRX	4.91893e-08	0.282006	0.622	0.507	0.000923923
FNBP1	4.96245e-08	0.295922	0.692	0.605	0.000932098
BCLAF1	4.99941e-08	0.309914	0.565	0.449	0.00093904
RPS26	5.02278e-08	-0.364247	0.863	0.942	0.00094343
TMIGD2	5.28272e-08	0.28368	0.628	0.459	0.000992254
SCGB2A1	6.11852e-08	0.402451	0.429	0.282	0.00114924
ROMO1	6.49418e-08	-0.250239	0.523	0.697	0.0012198
MCTP2	6.57407e-08	0.315018	0.407	0.259	0.00123481
CD38	7.33046e-08	0.354071	0.479	0.344	0.00137688
ITM2C	8.80151e-08	0.574017	0.601	0.507	0.00165319
AKNA	8.86829e-08	0.343411	0.555	0.456	0.00166573
TTC14	9.21722e-08	0.286593	0.44	0.303	0.00173127
SMG1	9.6674e-08	0.307766	0.344	0.214	0.00181583
ANKRD36	9.7184e-08	0.302383	0.353	0.211	0.00182541
DYNLT1	1.00176e-07	0.289115	0.594	0.497	0.00188161
EPAS1	1.00477e-07	0.345001	0.294	0.146	0.00188726
GPATCH8	1.09429e-07	0.314815	0.399	0.265	0.00205541
AIM1	1.19772e-07	0.303846	0.327	0.18	0.00224967
SRRM2	1.20651e-07	0.282326	0.647	0.551	0.0022662
GPR65	1.22489e-07	0.309009	0.591	0.463	0.00230071
XRN1	1.29556e-07	0.314886	0.422	0.282	0.00243346
IGFBP2	1.32236e-07	0.44218	0.547	0.442	0.0024838
C9orf156	1.35956e-07	0.335645	0.262	0.122	0.00255365
CD160	1.39152e-07	0.425503	0.357	0.197	0.00261369
RASA2	1.54941e-07	0.309755	0.41	0.265	0.00291025
MYH9	1.6812e-07	0.306892	0.565	0.463	0.0031578
N4BP2L2	1.72525e-07	0.267285	0.782	0.684	0.00324054
OGT	1.77712e-07	0.312034	0.327	0.194	0.00333797
TNRC6B	2.03189e-07	0.320388	0.509	0.391	0.0038165
DDX39B	2.24133e-07	0.320353	0.402	0.279	0.00420988
HIST1H1E	2.46823e-07	0.404365	0.389	0.265	0.00463607
SRGAP3	2.52121e-07	0.317345	0.424	0.293	0.0047356
DOCK10	2.60156e-07	0.332576	0.408	0.282	0.00488651
RNF19A	2.70678e-07	0.339612	0.477	0.344	0.00508414
VMP1	3.1341e-07	-0.264308	0.301	0.473	0.00588679
XIST	3.20498e-07	0.295657	0.685	0.626	0.00601991
SKIL	3.46189e-07	0.286038	0.418	0.279	0.00650247
CITED2	3.4801e-07	-0.41346	0.369	0.527	0.00653667
KLRC2	3.53186e-07	0.615409	0.495	0.378	0.00663389
MBNL1	3.53838e-07	0.288333	0.65	0.568	0.00664613
KIAA1551	3.82755e-07	0.328008	0.606	0.517	0.00718929
SACM1L	4.11396e-07	0.288657	0.391	0.262	0.00772725
MACF1	4.2928e-07	0.293459	0.583	0.48	0.00806316
DEDD2	4.4099e-07	-0.273335	0.175	0.313	0.00828311
FGR	4.87242e-07	0.263614	0.448	0.286	0.00915188
RAB8B	4.95188e-07	0.297588	0.494	0.378	0.00930112
HERPUD1	6.19211e-07	-0.339524	0.406	0.561	0.0116306
CCSER2	6.2997e-07	0.282377	0.526	0.415	0.0118327
DOCK8	6.39495e-07	0.302514	0.547	0.449	0.0120116
SAMD9	6.54101e-07	0.314026	0.475	0.364	0.012286
G3BP2	6.899e-07	0.337856	0.545	0.449	0.0129584
SETD2	7.05318e-07	0.277837	0.319	0.19	0.013248
MATR3	7.9801e-07	0.291148	0.585	0.473	0.014989
CKLF	8.75481e-07	-0.358445	0.819	0.837	0.0164442
BST2	8.94128e-07	-0.263433	0.607	0.735	0.0167944
SCAF11	8.94363e-07	0.276259	0.599	0.493	0.0167988
LINC00996	9.17633e-07	0.348842	0.318	0.19	0.0172359
PRKX	9.5587e-07	0.344661	0.421	0.299	0.0179541
CYLD	9.89774e-07	0.301357	0.495	0.381	0.0185909
NEDD9	1.00236e-06	0.296753	0.376	0.248	0.0188272
GLUL	1.27968e-06	-0.278352	0.326	0.49	0.0240361
DNAJC1	1.28788e-06	0.276149	0.482	0.371	0.0241902
TROVE2	1.32085e-06	0.289161	0.363	0.245	0.0248096
H1FX	1.34554e-06	0.307565	0.491	0.364	0.0252732
CMC1	1.41449e-06	0.389672	0.725	0.656	0.0265684
YPEL3	1.53348e-06	0.299703	0.397	0.279	0.0288034
MSL2	1.77007e-06	0.250362	0.258	0.136	0.0332473
SAMD3	1.83597e-06	0.270204	0.702	0.65	0.034485
VAV3	1.86366e-06	0.268531	0.294	0.156	0.035005
HP1BP3	1.97957e-06	0.286097	0.574	0.514	0.0371822
APOBEC3H	2.01235e-06	0.305024	0.334	0.211	0.037798
SEC14L1	2.95211e-06	0.30626	0.424	0.316	0.0554495
KMT2C	2.95279e-06	0.269762	0.349	0.231	0.0554623
ITGA4	3.04862e-06	0.304339	0.512	0.418	0.0572622
ZNF292	3.23839e-06	0.265722	0.321	0.197	0.0608267
APOBEC3G	4.33898e-06	0.29166	0.864	0.833	0.0814991
HLA-DRB5	4.55761e-06	-0.26654	0.297	0.459	0.0856056
REL	4.67648e-06	0.530033	0.569	0.507	0.0878383
PRPF4B	4.81102e-06	0.258863	0.498	0.398	0.0903654
GTF2I	5.69097e-06	0.264734	0.421	0.327	0.106894
CD8A	6.14101e-06	-0.277055	0.161	0.282	0.115347
TGFB1	7.08016e-06	0.278395	0.62	0.551	0.132987
BIRC3	7.78399e-06	-0.305529	0.243	0.398	0.146207
ERBB2IP	9.94651e-06	0.272221	0.357	0.259	0.186825
USP47	1.04126e-05	0.283245	0.347	0.245	0.195581
EIF3G	1.08316e-05	0.257033	0.77	0.755	0.203449
IGLL5	1.12522e-05	-0.255081	0.187	0.313	0.21135
RUNX3	1.13557e-05	0.300536	0.584	0.531	0.213295
SLFN13	1.15191e-05	0.252405	0.256	0.146	0.216363
CD97	1.33563e-05	0.276479	0.689	0.622	0.250872
RBL2	1.34088e-05	0.285486	0.455	0.361	0.251858
PTPN22	1.45021e-05	0.268548	0.629	0.558	0.272394
CNOT6L	1.58813e-05	0.275588	0.525	0.415	0.298299
SMARCE1	1.58988e-05	0.268509	0.406	0.31	0.298627
MDFIC	1.73717e-05	0.283716	0.391	0.299	0.326294
CD69	2.03764e-05	-0.419515	0.914	0.932	0.382729
BHLHE40	2.10468e-05	0.338169	0.457	0.361	0.395322
SFPQ	2.33081e-05	0.25663	0.645	0.592	0.437796
PMAIP1	2.34264e-05	-0.27302	0.202	0.32	0.440019
RP11-473M20.7	2.34725e-05	0.261142	0.265	0.163	0.440884
ANKRD44	2.95345e-05	0.2748	0.386	0.296	0.554746
B3GNT7	3.20631e-05	0.318151	0.29	0.18	0.602242
BIRC2	3.80682e-05	0.262906	0.393	0.296	0.715035
DNMT1	4.00063e-05	0.266075	0.447	0.347	0.751439
RAD21	4.8726e-05	0.250102	0.457	0.395	0.91522
ABCB1	5.12243e-05	0.279938	0.401	0.32	0.962145
ATP11B	5.62828e-05	0.275242	0.304	0.214	1
CNOT2	6.45687e-05	0.259841	0.361	0.262	1
STRBP	7.37337e-05	0.259809	0.27	0.18	1
ZBTB16	7.74686e-05	0.267141	0.335	0.235	1
ANKRD11	8.23281e-05	0.274755	0.455	0.378	1
TNFAIP3	8.38547e-05	0.271911	0.584	0.5	1
HERC1	8.69139e-05	0.294337	0.387	0.306	1
NFKB1	8.92551e-05	0.3905	0.313	0.228	1
HIST1H1D	9.284e-05	0.271018	0.379	0.276	1
GZMH	9.44563e-05	-0.337523	0.59	0.69	1
ANKRD36C	0.000111365	0.267614	0.315	0.231	1
S100A4	0.000118137	-0.294323	0.844	0.912	1
DUSP4	0.000120744	-0.275489	0.257	0.381	1
KIAA0947	0.000140172	0.260174	0.275	0.19	1
ZNF217	0.000170097	0.271665	0.262	0.173	1
TMEM2	0.000515652	0.33675	0.412	0.34	1
AKAP5	0.000518969	0.274396	0.29	0.214	1
ECI2	0.000548724	0.259032	0.395	0.333	1
GPR171	0.00107129	0.307184	0.488	0.418	1
TNFRSF18	0.0015017	-0.285152	0.566	0.636	1
LTB	0.00952877	-0.380284	0.537	0.588	1
