# Supplementary material for: Phenotyping of immune and endometrial epithelial cells in endometrial carcinomas revealed by single-cell RNA sequencing
Source: Aging (Albany NY). 2021 Jan 10;13(5):6565–91. doi: 10.18632/aging.202288 (PMC7993685; doi:10.18632/aging.202288)
Supplement: Additional File 2 [file aging-13-202288-s003.xlsx]

## Sheet: Epithelial.Tumor vs Para（EC1-3）
Additional File 2. DEGs of tumor vs para of epithelial cells.
p_val	avg_logFC	pct.1	pct.2	p_val_adj	cluster	gene
SPP1	0	-0.875555	0.378	0.84	0	P3.Epcell	SPP1
C1QA	6.98093e-251	-0.456714	0.076	0.457	1.45643e-246	P3.Epcell	C1QA
C1QB	5.39217e-221	-0.4381	0.079	0.429	1.12497e-216	P3.Epcell	C1QB
HSPA1A	2.58937e-216	-0.660242	0.396	0.767	5.40219e-212	P3.Epcell	HSPA1A
KRT19	1.06083e-185	0.714241	0.947	0.87	2.21322e-181	P3.Epcell	KRT19
C1QC	3.40191e-185	-0.354507	0.053	0.345	7.0974e-181	P3.Epcell	C1QC
FCER1G	8.31983e-184	-0.455405	0.199	0.555	1.73577e-179	P3.Epcell	FCER1G
SAA2	1.14094e-177	1.91341	0.655	0.403	2.38035e-173	P3.Epcell	SAA2
SAA1	3.95755e-165	1.88912	0.716	0.534	8.25663e-161	P3.Epcell	SAA1
LCN2	4.26005e-162	1.52504	0.759	0.628	8.88773e-158	P3.Epcell	LCN2
APOE	6.78354e-157	-0.481146	0.279	0.612	1.41525e-152	P3.Epcell	APOE
CCL3	1.60322e-156	-0.351475	0.155	0.473	3.34479e-152	P3.Epcell	CCL3
RGS1	8.12939e-145	-0.468451	0.361	0.68	1.69604e-140	P3.Epcell	RGS1
MT-CYB	7.16577e-144	-0.657059	0.94	0.963	1.495e-139	P3.Epcell	MT-CYB
IFI27	9.66873e-143	1.11739	0.857	0.787	2.01719e-138	P3.Epcell	IFI27
IGLL5	9.83101e-142	2.04376	0.357	0.076	2.05104e-137	P3.Epcell	IGLL5
PDZK1IP1	1.55793e-141	0.979691	0.642	0.405	3.25031e-137	P3.Epcell	PDZK1IP1
CXCL5	7.95792e-141	1.11858	0.556	0.258	1.66026e-136	P3.Epcell	CXCL5
S100P	6.25438e-140	0.864496	0.378	0.098	1.30485e-135	P3.Epcell	S100P
IFI6	3.49728e-133	1.3439	0.658	0.483	7.29638e-129	P3.Epcell	IFI6
MSX1	1.57577e-132	-0.482182	0.462	0.727	3.28753e-128	P3.Epcell	MSX1
AIF1	2.08751e-132	-0.293832	0.084	0.341	4.35517e-128	P3.Epcell	AIF1
MLF1	7.12481e-128	-0.430361	0.129	0.399	1.48645e-123	P3.Epcell	MLF1
MT-ND5	2.5783e-127	-0.519879	0.81	0.89	5.3791e-123	P3.Epcell	MT-ND5
SLC40A1	5.67708e-126	0.706643	0.771	0.647	1.18441e-121	P3.Epcell	SLC40A1
ALOX5AP	5.73333e-126	-0.395536	0.212	0.503	1.19615e-121	P3.Epcell	ALOX5AP
CSTB	1.34918e-123	0.827585	0.982	0.963	2.8148e-119	P3.Epcell	CSTB
TYROBP	1.72057e-123	-0.386582	0.234	0.532	3.58963e-119	P3.Epcell	TYROBP
SYT8	6.53308e-121	0.690225	0.356	0.106	1.363e-116	P3.Epcell	SYT8
CD14	1.00327e-119	-0.303264	0.134	0.397	2.09312e-115	P3.Epcell	CD14
MT-ND4	1.64283e-116	-0.515867	0.966	0.987	3.42744e-112	P3.Epcell	MT-ND4
CEACAM5	3.7813e-114	0.629802	0.298	0.06	7.88893e-110	P3.Epcell	CEACAM5
C19orf33	1.01892e-113	0.485549	0.805	0.659	2.12578e-109	P3.Epcell	C19orf33
H2AFJ	2.47805e-112	-0.298738	0.246	0.547	5.16995e-108	P3.Epcell	H2AFJ
FTH1	1.02062e-111	0.372213	1	1	2.12932e-107	P3.Epcell	FTH1
CXCL17	1.64305e-108	0.71037	0.419	0.171	3.4279e-104	P3.Epcell	CXCL17
MT-ND2	1.73944e-107	-0.592763	0.943	0.972	3.629e-103	P3.Epcell	MT-ND2
IGFBP3	6.5249e-107	0.598593	0.679	0.459	1.36129e-102	P3.Epcell	IGFBP3
SPINK1	3.1856e-106	0.534392	0.279	0.057	6.64613e-102	P3.Epcell	SPINK1
WDR16	1.04006e-104	-0.308567	0.065	0.273	2.16988e-100	P3.Epcell	WDR16
SRD5A3	1.47306e-104	0.763019	0.671	0.545	3.07324e-100	P3.Epcell	SRD5A3
S100A6	3.23743e-104	0.576977	0.977	0.98	6.75425e-100	P3.Epcell	S100A6
TPM1	1.33087e-103	0.464044	0.798	0.683	2.77659e-99	P3.Epcell	TPM1
APOC1	5.36972e-103	-0.416566	0.219	0.476	1.12029e-98	P3.Epcell	APOC1
MT-CO2	4.72593e-102	-0.539347	0.981	0.992	9.85971e-98	P3.Epcell	MT-CO2
C11orf88	5.0975e-102	-0.688462	0.12	0.346	1.06349e-97	P3.Epcell	C11orf88
SLPI	3.14617e-99	1.03116	0.953	0.966	6.56386e-95	P3.Epcell	SLPI
DRC1	7.7689e-99	-0.292269	0.077	0.289	1.62082e-94	P3.Epcell	DRC1
ALDOA	9.40264e-99	0.336374	0.977	0.963	1.96167e-94	P3.Epcell	ALDOA
SAA4	1.42291e-98	0.53248	0.412	0.175	2.96862e-94	P3.Epcell	SAA4
ATP1B1	1.05975e-96	0.78143	0.78	0.718	2.21095e-92	P3.Epcell	ATP1B1
CEACAM6	1.55644e-96	0.508801	0.268	0.057	3.24721e-92	P3.Epcell	CEACAM6
MALL	4.45492e-96	0.428951	0.396	0.162	9.2943e-92	P3.Epcell	MALL
SRGN	5.38611e-96	-0.366798	0.402	0.666	1.1237e-91	P3.Epcell	SRGN
MT-ATP6	7.22646e-96	-0.488038	0.931	0.957	1.50766e-91	P3.Epcell	MT-ATP6
S100A9	1.10856e-95	1.44875	0.626	0.453	2.31279e-91	P3.Epcell	S100A9
SOD2	4.11759e-94	0.562641	0.862	0.806	8.59053e-90	P3.Epcell	SOD2
GAPDH	5.71657e-94	0.314943	0.998	0.994	1.19265e-89	P3.Epcell	GAPDH
PIGR	6.41339e-93	0.77885	0.836	0.711	1.33803e-88	P3.Epcell	PIGR
ANXA4	3.13608e-92	0.42332	0.834	0.774	6.54281e-88	P3.Epcell	ANXA4
DHRS9	4.79907e-92	0.365353	0.254	0.053	1.00123e-87	P3.Epcell	DHRS9
SPAG17	4.8855e-92	-0.292705	0.138	0.371	1.01926e-87	P3.Epcell	SPAG17
LYNX1	9.82291e-90	0.592643	0.633	0.4	2.04935e-85	P3.Epcell	LYNX1
S100A11	3.13912e-88	0.285118	0.999	0.995	6.54915e-84	P3.Epcell	S100A11
PDE4C	1.8685e-87	0.489635	0.412	0.204	3.89824e-83	P3.Epcell	PDE4C
VIM	4.45077e-87	-0.544999	0.85	0.942	9.28564e-83	P3.Epcell	VIM
MT-ND3	4.62921e-87	-0.434284	0.921	0.919	9.65791e-83	P3.Epcell	MT-ND3
MT-CO3	1.10071e-86	-0.427852	0.982	0.991	2.29642e-82	P3.Epcell	MT-CO3
MT-CO1	3.04154e-86	-0.442353	0.99	0.995	6.34557e-82	P3.Epcell	MT-CO1
PROM1	1.2591e-85	-0.199115	0.245	0.512	2.62685e-81	P3.Epcell	PROM1
RPS26	7.7549e-85	0.341051	0.966	0.965	1.6179e-80	P3.Epcell	RPS26
ANXA2	7.95125e-84	0.334518	0.982	0.983	1.65887e-79	P3.Epcell	ANXA2
S100A10	2.74925e-83	0.381208	0.943	0.917	5.73576e-79	P3.Epcell	S100A10
SFN	1.65125e-80	0.600759	0.613	0.453	3.445e-76	P3.Epcell	SFN
AGR2	1.93703e-80	0.512647	0.848	0.797	4.04122e-76	P3.Epcell	AGR2
SERPINB1	3.25261e-80	0.43337	0.825	0.776	6.78591e-76	P3.Epcell	SERPINB1
PGR	3.70084e-80	-0.324634	0.264	0.502	7.72107e-76	P3.Epcell	PGR
SLC26A2	9.07554e-80	-0.367321	0.275	0.509	1.89343e-75	P3.Epcell	SLC26A2
S100A8	1.03543e-78	1.49456	0.478	0.289	2.16022e-74	P3.Epcell	S100A8
FHL2	1.26321e-78	0.465966	0.629	0.462	2.63543e-74	P3.Epcell	FHL2
KIAA1324	2.50137e-78	-0.248294	0.188	0.412	5.21861e-74	P3.Epcell	KIAA1324
CLIC1	7.09411e-78	0.30755	0.925	0.896	1.48004e-73	P3.Epcell	CLIC1
ACTG1	2.23968e-77	0.257572	0.996	0.987	4.67264e-73	P3.Epcell	ACTG1
CXCL2	6.79034e-77	-0.673733	0.189	0.424	1.41667e-72	P3.Epcell	CXCL2
C15orf48	1.32848e-76	0.725968	0.593	0.466	2.77162e-72	P3.Epcell	C15orf48
CTNNB1	3.45645e-76	0.685178	0.737	0.644	7.2112e-72	P3.Epcell	CTNNB1
TMEM101	6.85779e-75	-0.266239	0.264	0.512	1.43074e-70	P3.Epcell	TMEM101
MUC4	1.79858e-73	0.381059	0.338	0.137	3.75238e-69	P3.Epcell	MUC4
LDHA	2.75752e-72	0.374392	0.922	0.874	5.75302e-68	P3.Epcell	LDHA
LGALS1	6.21745e-72	-0.278686	0.649	0.851	1.29715e-67	P3.Epcell	LGALS1
CCL2	7.35676e-72	-0.423755	0.079	0.251	1.53484e-67	P3.Epcell	CCL2
GPR183	1.81435e-71	-0.155612	0.086	0.262	3.78527e-67	P3.Epcell	GPR183
MT-ND4L	3.06904e-71	-0.0173386	0.679	0.856	6.40294e-67	P3.Epcell	MT-ND4L
EIF5A	3.7251e-71	0.517045	0.835	0.766	7.77168e-67	P3.Epcell	EIF5A
PRDX1	6.83089e-71	0.343455	0.962	0.958	1.42513e-66	P3.Epcell	PRDX1
MUC1	2.49472e-70	0.528577	0.805	0.789	5.20472e-66	P3.Epcell	MUC1
PKM	3.5368e-70	0.35333	0.941	0.922	7.37882e-66	P3.Epcell	PKM
S100A2	4.90262e-70	0.759675	0.567	0.385	1.02283e-65	P3.Epcell	S100A2
MT-ND1	8.73509e-70	-0.463479	0.907	0.926	1.8224e-65	P3.Epcell	MT-ND1
LYZ	9.88696e-70	-0.185109	0.13	0.325	2.06272e-65	P3.Epcell	LYZ
TSPAN1	1.38762e-69	0.602945	0.813	0.747	2.89499e-65	P3.Epcell	TSPAN1
ISG15	1.60001e-69	0.485147	0.744	0.668	3.3381e-65	P3.Epcell	ISG15
KRT8	7.39029e-69	0.305472	0.968	0.94	1.54184e-64	P3.Epcell	KRT8
SDC1	7.5864e-69	0.457804	0.478	0.317	1.58275e-64	P3.Epcell	SDC1
GCNT3	3.50638e-68	0.343592	0.383	0.198	7.31537e-64	P3.Epcell	GCNT3
CLU	6.0117e-68	0.245676	0.754	0.611	1.25422e-63	P3.Epcell	CLU
MPPED2	9.07893e-68	-0.189537	0.16	0.36	1.89414e-63	P3.Epcell	MPPED2
FOS	1.07195e-67	-0.353831	0.909	0.961	2.23641e-63	P3.Epcell	FOS
EGR1	2.78184e-67	-0.343645	0.558	0.74	5.80374e-63	P3.Epcell	EGR1
CDKN2A	3.65318e-67	0.551813	0.645	0.527	7.62164e-63	P3.Epcell	CDKN2A
PI3	4.2855e-67	0.627794	0.324	0.138	8.94085e-63	P3.Epcell	PI3
PAM	5.69247e-66	-0.256107	0.414	0.64	1.18762e-61	P3.Epcell	PAM
GNAS	5.69712e-66	-0.277182	0.787	0.884	1.18859e-61	P3.Epcell	GNAS
THSD4	7.52811e-66	-0.455252	0.306	0.517	1.57059e-61	P3.Epcell	THSD4
C4orf3	3.63026e-65	0.290491	0.913	0.894	7.57381e-61	P3.Epcell	C4orf3
LRIG1	7.43449e-65	-0.176167	0.167	0.36	1.55106e-60	P3.Epcell	LRIG1
ID3	1.83814e-64	-0.496673	0.248	0.461	3.83491e-60	P3.Epcell	ID3
EPHX1	1.91786e-64	-0.354456	0.529	0.718	4.00122e-60	P3.Epcell	EPHX1
BIRC3	8.56977e-64	0.40269	0.698	0.548	1.78791e-59	P3.Epcell	BIRC3
CLDN1	1.22114e-62	0.419764	0.399	0.22	2.54767e-58	P3.Epcell	CLDN1
ZFP36	1.91985e-62	-0.414609	0.833	0.92	4.00538e-58	P3.Epcell	ZFP36
FXYD3	3.6458e-62	0.428044	0.878	0.855	7.60623e-58	P3.Epcell	FXYD3
RP11-314M24.1	4.77756e-62	0.391357	0.361	0.183	9.96743e-58	P3.Epcell	RP11-314M24.1
WASH4P	2.10877e-61	0.411823	0.555	0.449	4.39952e-57	P3.Epcell	WASH4P
TMEM176B	1.07599e-60	-0.192353	0.139	0.326	2.24483e-56	P3.Epcell	TMEM176B
RARRES1	1.25631e-60	0.846873	0.313	0.143	2.62105e-56	P3.Epcell	RARRES1
SERPINA1	1.00836e-58	0.588862	0.795	0.748	2.10375e-54	P3.Epcell	SERPINA1
BST2	5.89943e-58	0.461736	0.614	0.511	1.2308e-53	P3.Epcell	BST2
GPX1	1.12612e-57	0.355306	0.965	0.97	2.34943e-53	P3.Epcell	GPX1
LGR5	2.07324e-57	-0.212407	0.126	0.295	4.32539e-53	P3.Epcell	LGR5
RP11-510D19.1	4.50945e-57	-0.240837	0.306	0.519	9.40806e-53	P3.Epcell	RP11-510D19.1
MT1E	2.60402e-56	-0.102669	0.255	0.478	5.43277e-52	P3.Epcell	MT1E
EFNA5	1.09598e-55	0.258164	0.272	0.114	2.28655e-51	P3.Epcell	EFNA5
CXCL1	1.46581e-55	-0.168957	0.277	0.495	3.05812e-51	P3.Epcell	CXCL1
TMC5	5.26158e-55	0.409954	0.644	0.525	1.09772e-50	P3.Epcell	TMC5
XIST	9.90202e-55	-0.261872	0.622	0.779	2.06586e-50	P3.Epcell	XIST
CYBA	2.89488e-54	0.355094	0.96	0.979	6.03958e-50	P3.Epcell	CYBA
STMN1	3.47116e-54	-0.266796	0.391	0.608	7.24189e-50	P3.Epcell	STMN1
IL32	3.99202e-54	0.431825	0.837	0.772	8.32856e-50	P3.Epcell	IL32
MMP7	6.08202e-54	0.475361	0.719	0.57	1.26889e-49	P3.Epcell	MMP7
TMEM176A	7.89523e-54	-0.177943	0.117	0.277	1.64718e-49	P3.Epcell	TMEM176A
B3GNT7	9.69457e-54	0.403525	0.441	0.285	2.02258e-49	P3.Epcell	B3GNT7
IGFBP5	2.21614e-53	-0.40456	0.318	0.506	4.62354e-49	P3.Epcell	IGFBP5
HOXB3	2.31703e-53	-0.164136	0.194	0.375	4.83401e-49	P3.Epcell	HOXB3
RGS2	4.86513e-53	-0.150487	0.133	0.302	1.01501e-48	P3.Epcell	RGS2
CRYAB	9.89243e-53	0.375963	0.49	0.305	2.06386e-48	P3.Epcell	CRYAB
NUPR1	2.95842e-52	-0.275713	0.517	0.707	6.17216e-48	P3.Epcell	NUPR1
EPPK1	6.38997e-52	0.296413	0.291	0.135	1.33314e-47	P3.Epcell	EPPK1
CLDN10	6.45135e-52	0.371254	0.688	0.565	1.34594e-47	P3.Epcell	CLDN10
SRGAP3	7.10941e-52	-0.199216	0.279	0.47	1.48324e-47	P3.Epcell	SRGAP3
GPR110	7.32517e-52	0.215792	0.272	0.114	1.52825e-47	P3.Epcell	GPR110
METRN	1.91371e-51	-0.260511	0.176	0.338	3.99258e-47	P3.Epcell	METRN
KRT7	6.99945e-50	0.346564	0.718	0.595	1.4603e-45	P3.Epcell	KRT7
TMPRSS4	1.17246e-49	0.358077	0.528	0.409	2.4461e-45	P3.Epcell	TMPRSS4
REV3L	1.93153e-49	-0.155641	0.324	0.529	4.02975e-45	P3.Epcell	REV3L
PGK1	3.56546e-49	0.312477	0.852	0.817	7.43863e-45	P3.Epcell	PGK1
GAS6	4.56544e-49	-0.126989	0.143	0.308	9.52488e-45	P3.Epcell	GAS6
KYNU	2.45109e-48	0.225641	0.297	0.14	5.11371e-44	P3.Epcell	KYNU
UPK1B	3.60305e-48	0.340122	0.486	0.331	7.51705e-44	P3.Epcell	UPK1B
SRRM2	5.56767e-48	-0.200381	0.607	0.777	1.16158e-43	P3.Epcell	SRRM2
TSPO	6.30222e-48	0.291336	0.871	0.857	1.31483e-43	P3.Epcell	TSPO
CKB	1.05704e-47	-0.169453	0.594	0.769	2.20529e-43	P3.Epcell	CKB
EMX2	1.42215e-47	-0.213625	0.402	0.59	2.96703e-43	P3.Epcell	EMX2
PODXL	3.06334e-47	-0.323883	0.416	0.59	6.39105e-43	P3.Epcell	PODXL
CCL20	4.06708e-47	0.3663	0.617	0.444	8.48514e-43	P3.Epcell	CCL20
MECOM	4.36044e-47	-0.192394	0.372	0.556	9.09719e-43	P3.Epcell	MECOM
PNISR	6.79118e-47	-0.22715	0.607	0.765	1.41684e-42	P3.Epcell	PNISR
SEC61G	6.89777e-47	0.191569	0.953	0.938	1.43908e-42	P3.Epcell	SEC61G
TMEM132A	1.39108e-46	-0.21156	0.211	0.377	2.90221e-42	P3.Epcell	TMEM132A
HLA-A	2.38511e-46	0.28064	0.937	0.948	4.97605e-42	P3.Epcell	HLA-A
RSRC1	3.6232e-46	-0.12382	0.176	0.35	7.55907e-42	P3.Epcell	RSRC1
TXN	4.80991e-46	0.404579	0.978	0.987	1.00349e-41	P3.Epcell	TXN
ARPC1B	4.91948e-46	0.263925	0.821	0.793	1.02635e-41	P3.Epcell	ARPC1B
MIR4458HG	5.64012e-46	-0.111588	0.162	0.33	1.1767e-41	P3.Epcell	MIR4458HG
PON2	8.66471e-46	0.335342	0.59	0.504	1.80772e-41	P3.Epcell	PON2
PTP4A1	9.29775e-46	0.313045	0.786	0.764	1.93979e-41	P3.Epcell	PTP4A1
CROCC	1.03524e-45	-0.157808	0.117	0.26	2.15981e-41	P3.Epcell	CROCC
HLA-C	1.05363e-45	0.289586	0.927	0.938	2.19818e-41	P3.Epcell	HLA-C
PSME2	1.51641e-45	0.257864	0.882	0.849	3.16369e-41	P3.Epcell	PSME2
AKR1C3	1.52977e-45	0.311797	0.398	0.242	3.19155e-41	P3.Epcell	AKR1C3
ANKRD65	2.0693e-45	-0.160861	0.144	0.293	4.31719e-41	P3.Epcell	ANKRD65
TMEM159	3.83195e-45	0.258563	0.312	0.168	7.99459e-41	P3.Epcell	TMEM159
COTL1	6.36628e-45	-0.168721	0.248	0.43	1.3282e-40	P3.Epcell	COTL1
MIR24-2	1.00303e-44	-0.270627	0.347	0.528	2.09262e-40	P3.Epcell	MIR24-2
CIRBP	1.13274e-44	-0.207429	0.786	0.888	2.36325e-40	P3.Epcell	CIRBP
GPM6B	2.28366e-44	-0.173789	0.229	0.397	4.76439e-40	P3.Epcell	GPM6B
CD200	3.38901e-44	-0.130916	0.141	0.293	7.0705e-40	P3.Epcell	CD200
TACSTD2	9.70964e-44	0.319028	0.83	0.835	2.02572e-39	P3.Epcell	TACSTD2
CDC42	1.26642e-43	0.294129	0.927	0.919	2.64212e-39	P3.Epcell	CDC42
C1orf21	1.3265e-43	0.220163	0.303	0.162	2.76747e-39	P3.Epcell	C1orf21
MYL6B	1.37292e-43	-0.207432	0.495	0.664	2.86432e-39	P3.Epcell	MYL6B
HLA-DQA2	5.66057e-42	-0.140331	0.141	0.294	1.18097e-37	P3.Epcell	HLA-DQA2
RARRES3	6.66543e-42	0.34356	0.79	0.728	1.39061e-37	P3.Epcell	RARRES3
N4BP2L2	9.66213e-42	-0.195918	0.663	0.814	2.01581e-37	P3.Epcell	N4BP2L2
HMGCR	1.00466e-41	-0.214197	0.305	0.474	2.09602e-37	P3.Epcell	HMGCR
SERPINA5	1.12121e-41	-0.35615	0.238	0.403	2.33918e-37	P3.Epcell	SERPINA5
GPRC5A	1.40149e-41	0.30161	0.493	0.336	2.92393e-37	P3.Epcell	GPRC5A
RP13-1039J1.2	1.46065e-41	-0.123594	0.149	0.295	3.04736e-37	P3.Epcell	RP13-1039J1.2
ERO1L	1.70807e-41	0.393941	0.605	0.53	3.56354e-37	P3.Epcell	ERO1L
APOL2	3.98178e-41	0.317145	0.45	0.321	8.3072e-37	P3.Epcell	APOL2
LY6E	6.06133e-41	0.316951	0.763	0.694	1.26457e-36	P3.Epcell	LY6E
FABP6	1.23476e-40	-0.387083	0.141	0.276	2.57607e-36	P3.Epcell	FABP6
FOSB	1.23981e-40	-0.285735	0.568	0.716	2.58661e-36	P3.Epcell	FOSB
DLX5	1.88893e-40	-0.220148	0.491	0.668	3.94087e-36	P3.Epcell	DLX5
ID2	4.68206e-40	-0.325723	0.498	0.655	9.76819e-36	P3.Epcell	ID2
GADD45B	6.67125e-40	-0.436725	0.476	0.629	1.39182e-35	P3.Epcell	GADD45B
CIB1	6.80395e-40	0.318604	0.896	0.876	1.41951e-35	P3.Epcell	CIB1
H1FX	8.29539e-40	-0.164968	0.34	0.514	1.73067e-35	P3.Epcell	H1FX
AP1S2	2.07646e-39	-0.133186	0.359	0.557	4.33212e-35	P3.Epcell	AP1S2
ENO1	2.17775e-39	0.262205	0.948	0.926	4.54345e-35	P3.Epcell	ENO1
MAL2	2.93894e-39	0.278908	0.582	0.509	6.13151e-35	P3.Epcell	MAL2
C2orf88	3.01466e-39	-0.235499	0.592	0.736	6.28949e-35	P3.Epcell	C2orf88
HSPA2	3.37859e-39	-0.135378	0.123	0.26	7.04875e-35	P3.Epcell	HSPA2
WTAP	4.61466e-39	0.332836	0.628	0.543	9.62757e-35	P3.Epcell	WTAP
FXYD5	6.25459e-39	-0.143172	0.155	0.298	1.3049e-34	P3.Epcell	FXYD5
ABCA5	8.23156e-39	-0.225463	0.319	0.48	1.71735e-34	P3.Epcell	ABCA5
C7orf55	1.08866e-38	-0.154634	0.376	0.554	2.27127e-34	P3.Epcell	C7orf55
SCD5	1.48468e-38	-0.102826	0.139	0.282	3.09749e-34	P3.Epcell	SCD5
RAMP1	2.52858e-38	0.246448	0.329	0.19	5.27538e-34	P3.Epcell	RAMP1
ATP6V1C2	2.86361e-38	-0.125172	0.221	0.389	5.97434e-34	P3.Epcell	ATP6V1C2
KRT18	2.91442e-38	0.234489	0.964	0.943	6.08036e-34	P3.Epcell	KRT18
PPAP2C	3.01145e-38	-0.202431	0.563	0.712	6.28278e-34	P3.Epcell	PPAP2C
SCGB1D4	4.52702e-38	-0.0678452	0.173	0.322	9.44472e-34	P3.Epcell	SCGB1D4
COL1A2	5.64505e-38	-0.0560401	0.254	0.424	1.17773e-33	P3.Epcell	COL1A2
C1orf63	6.08146e-38	-0.181178	0.555	0.728	1.26878e-33	P3.Epcell	C1orf63
ASS1	9.21092e-38	0.253371	0.481	0.334	1.92167e-33	P3.Epcell	ASS1
F3	1.22097e-37	0.443762	0.436	0.298	2.54732e-33	P3.Epcell	F3
SMARCA1	2.99546e-37	-0.0951972	0.188	0.348	6.24942e-33	P3.Epcell	SMARCA1
TLE4	3.20522e-37	-0.137928	0.132	0.267	6.68705e-33	P3.Epcell	TLE4
SLC6A14	4.8023e-37	0.312774	0.255	0.129	1.0019e-32	P3.Epcell	SLC6A14
MIR4435-1HG	8.49262e-37	0.32422	0.502	0.394	1.77182e-32	P3.Epcell	MIR4435-1HG
PBX1	1.07684e-36	-0.156646	0.328	0.489	2.24662e-32	P3.Epcell	PBX1
BMPR1B	1.16081e-36	-0.16849	0.28	0.443	2.42181e-32	P3.Epcell	BMPR1B
SPRY1	1.82039e-36	-0.441635	0.307	0.446	3.79788e-32	P3.Epcell	SPRY1
KIAA1551	2.01219e-36	-0.159401	0.403	0.575	4.19803e-32	P3.Epcell	KIAA1551
SERINC2	2.04796e-36	0.271913	0.704	0.662	4.27265e-32	P3.Epcell	SERINC2
TGM2	2.40043e-36	0.287116	0.371	0.241	5.00801e-32	P3.Epcell	TGM2
MYL6	2.87346e-36	0.146454	0.996	0.994	5.99489e-32	P3.Epcell	MYL6
ZNF22	3.17195e-36	-0.0993056	0.201	0.355	6.61765e-32	P3.Epcell	ZNF22
EIF4A1	4.18778e-36	0.179254	0.967	0.968	8.73696e-32	P3.Epcell	EIF4A1
BCL10	4.95125e-36	0.266426	0.54	0.427	1.03298e-31	P3.Epcell	BCL10
CEBPD	6.73524e-36	-0.324955	0.752	0.845	1.40517e-31	P3.Epcell	CEBPD
SLC34A2	7.25184e-36	0.293705	0.789	0.715	1.51295e-31	P3.Epcell	SLC34A2
ESR1	7.73843e-36	-0.206191	0.541	0.681	1.61447e-31	P3.Epcell	ESR1
MAPK15	7.93596e-36	-0.229861	0.203	0.341	1.65568e-31	P3.Epcell	MAPK15
HSPA8	1.50815e-35	0.229573	0.91	0.872	3.14645e-31	P3.Epcell	HSPA8
EBP	1.80932e-35	-0.0796412	0.16	0.306	3.77478e-31	P3.Epcell	EBP
REC8	2.35478e-35	-0.0833082	0.141	0.28	4.91277e-31	P3.Epcell	REC8
ATN1	2.69745e-35	-0.124448	0.217	0.364	5.62768e-31	P3.Epcell	ATN1
SFTA2	2.99068e-35	0.331171	0.62	0.519	6.23946e-31	P3.Epcell	SFTA2
HOXB4	3.86354e-35	-0.113759	0.204	0.354	8.0605e-31	P3.Epcell	HOXB4
PRDM1	4.92865e-35	0.213499	0.277	0.151	1.02826e-30	P3.Epcell	PRDM1
ZFHX3	4.97391e-35	-0.137303	0.329	0.492	1.03771e-30	P3.Epcell	ZFHX3
IFITM3	5.67417e-35	0.193363	0.968	0.972	1.1838e-30	P3.Epcell	IFITM3
DYNLT1	9.5351e-35	0.216984	0.948	0.933	1.98931e-30	P3.Epcell	DYNLT1
UQCR11.1	1.03737e-34	0.176367	0.955	0.951	2.16427e-30	P3.Epcell	UQCR11.1
ARF6	1.36591e-34	0.258134	0.635	0.556	2.8497e-30	P3.Epcell	ARF6
TNS3	2.80997e-34	-0.115089	0.147	0.276	5.86244e-30	P3.Epcell	TNS3
TMSB4X	5.15478e-34	0.139537	1	1	1.07544e-29	P3.Epcell	TMSB4X
C1orf186	7.25497e-34	-0.260575	0.616	0.717	1.5136e-29	P3.Epcell	C1orf186
SLFN13	7.97392e-34	-0.113217	0.14	0.267	1.6636e-29	P3.Epcell	SLFN13
ZNF592	1.08429e-33	-0.136012	0.183	0.319	2.26214e-29	P3.Epcell	ZNF592
EYA2	1.45635e-33	-0.159133	0.402	0.561	3.03838e-29	P3.Epcell	EYA2
STX18	2.02251e-33	-0.12586	0.557	0.728	4.21956e-29	P3.Epcell	STX18
WDR6	2.17085e-33	-0.114959	0.242	0.392	4.52904e-29	P3.Epcell	WDR6
HLA-DPB1	2.51332e-33	-0.260762	0.584	0.732	5.24354e-29	P3.Epcell	HLA-DPB1
PABPN1	3.21845e-33	-0.154893	0.419	0.579	6.71465e-29	P3.Epcell	PABPN1
PHLDA2	5.14043e-33	0.284645	0.587	0.471	1.07245e-28	P3.Epcell	PHLDA2
ZFP36L1	5.17871e-33	-0.302453	0.855	0.91	1.08043e-28	P3.Epcell	ZFP36L1
SOX6	8.97781e-33	-0.0948773	0.154	0.287	1.87304e-28	P3.Epcell	SOX6
DDX17	1.23375e-32	-0.193787	0.726	0.83	2.57397e-28	P3.Epcell	DDX17
ANK3	1.25621e-32	-0.129427	0.271	0.423	2.62083e-28	P3.Epcell	ANK3
MDK	1.34061e-32	-0.300126	0.764	0.843	2.79691e-28	P3.Epcell	MDK
TPI1	1.83023e-32	0.188138	0.968	0.956	3.8184e-28	P3.Epcell	TPI1
ID4	3.01893e-32	-0.37864	0.327	0.466	6.2984e-28	P3.Epcell	ID4
ZMYND8	3.4433e-32	-0.150173	0.396	0.556	7.18377e-28	P3.Epcell	ZMYND8
NEDD9	4.36857e-32	-0.330865	0.423	0.565	9.11414e-28	P3.Epcell	NEDD9
NR4A1	6.23528e-32	-0.285864	0.463	0.617	1.30087e-27	P3.Epcell	NR4A1
C12orf75	7.76888e-32	0.35306	0.881	0.854	1.62082e-27	P3.Epcell	C12orf75
EFHC1	8.79666e-32	-0.402856	0.42	0.545	1.83525e-27	P3.Epcell	EFHC1
CCDC85B	8.90655e-32	-0.1309	0.245	0.387	1.85817e-27	P3.Epcell	CCDC85B
RASD1	1.2376e-31	-0.28157	0.331	0.485	2.58201e-27	P3.Epcell	RASD1
CRISPLD1	1.59587e-31	-0.157045	0.22	0.356	3.32947e-27	P3.Epcell	CRISPLD1
ESPN	2.20943e-31	-0.124072	0.315	0.469	4.60954e-27	P3.Epcell	ESPN
ACYP1	2.40246e-31	-0.150192	0.257	0.402	5.01224e-27	P3.Epcell	ACYP1
KRTCAP3	2.55263e-31	-0.132322	0.323	0.478	5.32555e-27	P3.Epcell	KRTCAP3
ENPP3	3.37629e-31	-0.24979	0.206	0.341	7.04395e-27	P3.Epcell	ENPP3
TMEM98	4.7215e-31	-0.145482	0.179	0.309	9.85046e-27	P3.Epcell	TMEM98
CLGN	4.7381e-31	-0.213816	0.193	0.324	9.88509e-27	P3.Epcell	CLGN
IL8	5.50791e-31	0.509103	0.515	0.435	1.14912e-26	P3.Epcell	IL8
FAM118A	5.6272e-31	-0.0723357	0.147	0.275	1.174e-26	P3.Epcell	FAM118A
MICAL3	9.1107e-31	-0.0929179	0.138	0.26	1.90077e-26	P3.Epcell	MICAL3
TMSB10	9.18805e-31	0.0812766	1	1	1.9169e-26	P3.Epcell	TMSB10
CD81	1.05942e-30	-0.20722	0.714	0.844	2.21026e-26	P3.Epcell	CD81
NUCKS1	1.15021e-30	-0.151927	0.753	0.847	2.39968e-26	P3.Epcell	NUCKS1
RNF150	2.08012e-30	-0.0984139	0.187	0.319	4.33975e-26	P3.Epcell	RNF150
LUC7L3	2.34553e-30	-0.133569	0.515	0.671	4.89348e-26	P3.Epcell	LUC7L3
ACTB	3.41099e-30	0.129922	0.999	1	7.11636e-26	P3.Epcell	ACTB
GTF2IRD2B	3.72695e-30	-0.0883397	0.146	0.27	7.77553e-26	P3.Epcell	GTF2IRD2B
ADM	4.49516e-30	0.287832	0.461	0.346	9.37825e-26	P3.Epcell	ADM
FCGRT	5.28742e-30	-0.15329	0.43	0.592	1.10311e-25	P3.Epcell	FCGRT
EPHA2	5.76799e-30	0.23129	0.364	0.25	1.20337e-25	P3.Epcell	EPHA2
C4BPA	5.97238e-30	0.261696	0.328	0.21	1.24602e-25	P3.Epcell	C4BPA
IL4I1	6.2868e-30	0.30481	0.405	0.289	1.31161e-25	P3.Epcell	IL4I1
RIN2	9.05275e-30	0.297982	0.416	0.312	1.88868e-25	P3.Epcell	RIN2
CALR	1.24228e-29	0.235193	0.855	0.851	2.59176e-25	P3.Epcell	CALR
HIST1H4C	1.2708e-29	-0.218635	0.396	0.545	2.65127e-25	P3.Epcell	HIST1H4C
CCDC30	1.49325e-29	-0.127357	0.173	0.298	3.11537e-25	P3.Epcell	CCDC30
ARHGDIB	1.50043e-29	-0.154572	0.299	0.445	3.13034e-25	P3.Epcell	ARHGDIB
PRKX	1.66066e-29	-0.105677	0.284	0.438	3.46464e-25	P3.Epcell	PRKX
MT-ND6	2.52647e-29	-0.10591	0.351	0.517	5.27096e-25	P3.Epcell	MT-ND6
CD59	2.52956e-29	0.245677	0.828	0.812	5.27741e-25	P3.Epcell	CD59
CMPK1	2.94489e-29	0.205971	0.735	0.695	6.14393e-25	P3.Epcell	CMPK1
KRT23	4.3061e-29	0.292799	0.524	0.418	8.98382e-25	P3.Epcell	KRT23
LSP1	4.73026e-29	-0.0984448	0.145	0.267	9.86875e-25	P3.Epcell	LSP1
AMN1	5.62761e-29	-0.0918443	0.145	0.267	1.17409e-24	P3.Epcell	AMN1
PYCR2	5.74161e-29	-0.15327	0.32	0.467	1.19787e-24	P3.Epcell	PYCR2
POGZ	6.02699e-29	-0.125779	0.261	0.397	1.25741e-24	P3.Epcell	POGZ
MZT2A	7.66929e-29	-0.196977	0.463	0.598	1.60004e-24	P3.Epcell	MZT2A
CORO1A	1.09264e-28	-0.0902042	0.186	0.32	2.27958e-24	P3.Epcell	CORO1A
SEC62	1.16401e-28	-0.183925	0.797	0.881	2.42847e-24	P3.Epcell	SEC62
LGALS3	1.30566e-28	0.181035	0.933	0.914	2.724e-24	P3.Epcell	LGALS3
CP	1.85227e-28	0.341602	0.717	0.656	3.8644e-24	P3.Epcell	CP
ANKRD11	1.94315e-28	-0.143158	0.469	0.614	4.054e-24	P3.Epcell	ANKRD11
GMPR	1.9704e-28	-0.176062	0.325	0.468	4.11085e-24	P3.Epcell	GMPR
B2M	2.42467e-28	0.222174	0.998	1	5.05858e-24	P3.Epcell	B2M
WDR96	3.33681e-28	-0.239032	0.237	0.358	6.96158e-24	P3.Epcell	WDR96
SQRDL	3.41471e-28	0.226731	0.411	0.309	7.12411e-24	P3.Epcell	SQRDL
C12orf57	3.43531e-28	-0.130887	0.563	0.707	7.16708e-24	P3.Epcell	C12orf57
CHD9	3.74867e-28	-0.124302	0.404	0.561	7.82085e-24	P3.Epcell	CHD9
ZBBX	4.16838e-28	-0.185682	0.176	0.292	8.69649e-24	P3.Epcell	ZBBX
KIF12	4.60363e-28	-0.146655	0.22	0.348	9.60456e-24	P3.Epcell	KIF12
CHD7	5.12738e-28	-0.0924983	0.184	0.31	1.06973e-23	P3.Epcell	CHD7
C14orf159	5.20765e-28	-0.0830451	0.165	0.29	1.08647e-23	P3.Epcell	C14orf159
BTG2	5.31203e-28	-0.399047	0.577	0.704	1.10825e-23	P3.Epcell	BTG2
TXNDC17	8.94953e-28	0.202374	0.775	0.754	1.86714e-23	P3.Epcell	TXNDC17
BRK1	9.51816e-28	0.178777	0.837	0.833	1.98577e-23	P3.Epcell	BRK1
GJB2	9.92316e-28	0.202497	0.295	0.183	2.07027e-23	P3.Epcell	GJB2
CLTA	9.95088e-28	0.166739	0.894	0.886	2.07605e-23	P3.Epcell	CLTA
SRSF1	1.3116e-27	-0.134477	0.421	0.566	2.73638e-23	P3.Epcell	SRSF1
LENG8	1.32407e-27	-0.138186	0.317	0.455	2.7624e-23	P3.Epcell	LENG8
NFIC	1.34583e-27	-0.130543	0.419	0.558	2.8078e-23	P3.Epcell	NFIC
PPAP2B	1.37775e-27	-0.138483	0.204	0.33	2.8744e-23	P3.Epcell	PPAP2B
PGRMC1	1.57525e-27	-0.139518	0.604	0.743	3.28644e-23	P3.Epcell	PGRMC1
FGFBP1	2.0178e-27	0.124347	0.282	0.166	4.20974e-23	P3.Epcell	FGFBP1
PLEKHA5	2.08325e-27	-0.111502	0.364	0.515	4.34629e-23	P3.Epcell	PLEKHA5
IGF1R	2.54749e-27	-0.114152	0.284	0.42	5.31483e-23	P3.Epcell	IGF1R
JUNB	2.5544e-27	-0.289688	0.887	0.928	5.32925e-23	P3.Epcell	JUNB
ROMO1	2.98426e-27	0.176614	0.884	0.884	6.22605e-23	P3.Epcell	ROMO1
MT1F	3.08272e-27	-0.0986733	0.3	0.451	6.43147e-23	P3.Epcell	MT1F
SMAGP	3.38463e-27	0.191349	0.29	0.187	7.06135e-23	P3.Epcell	SMAGP
VMP1	3.85115e-27	-0.214782	0.698	0.821	8.03465e-23	P3.Epcell	VMP1
S100A13	4.86712e-27	0.174765	0.859	0.843	1.01543e-22	P3.Epcell	S100A13
AKR1A1	5.09564e-27	0.240955	0.694	0.67	1.0631e-22	P3.Epcell	AKR1A1
COA3	6.0814e-27	0.229306	0.777	0.756	1.26876e-22	P3.Epcell	COA3
BCAM	6.88327e-27	-0.132835	0.393	0.558	1.43606e-22	P3.Epcell	BCAM
RP11-640M9.1	7.99455e-27	-0.113034	0.244	0.377	1.6679e-22	P3.Epcell	RP11-640M9.1
TMEM63A	9.73577e-27	-0.101104	0.272	0.413	2.03117e-22	P3.Epcell	TMEM63A
POLR2L	1.07973e-26	0.155043	0.95	0.949	2.25265e-22	P3.Epcell	POLR2L
MT2A	1.17709e-26	-0.149406	0.621	0.766	2.45576e-22	P3.Epcell	MT2A
MALAT1	1.20662e-26	-0.175248	0.994	0.999	2.51737e-22	P3.Epcell	MALAT1
CLDN7	1.38596e-26	0.242372	0.792	0.799	2.89152e-22	P3.Epcell	CLDN7
NEIL1	1.78682e-26	-0.0946396	0.192	0.317	3.72784e-22	P3.Epcell	NEIL1
PPA1	2.46307e-26	0.169921	0.865	0.82	5.1387e-22	P3.Epcell	PPA1
CD55	2.53479e-26	0.360485	0.683	0.642	5.28833e-22	P3.Epcell	CD55
PHGDH	2.75091e-26	-0.0934338	0.229	0.371	5.73921e-22	P3.Epcell	PHGDH
STK33	3.80114e-26	-0.185077	0.252	0.376	7.93033e-22	P3.Epcell	STK33
S100A16	3.92639e-26	0.218893	0.527	0.426	8.19163e-22	P3.Epcell	S100A16
HSPH1	4.43008e-26	-0.239284	0.614	0.727	9.24248e-22	P3.Epcell	HSPH1
SNORA76	4.78043e-26	-0.150843	0.371	0.506	9.97341e-22	P3.Epcell	SNORA76
SPATA13	5.12112e-26	-0.114927	0.219	0.343	1.06842e-21	P3.Epcell	SPATA13
PTMS	5.14613e-26	-0.137609	0.43	0.575	1.07364e-21	P3.Epcell	PTMS
CITED4	6.43916e-26	-0.175597	0.62	0.741	1.3434e-21	P3.Epcell	CITED4
HLA-B	6.61901e-26	0.195538	0.955	0.97	1.38092e-21	P3.Epcell	HLA-B
DNMT1	6.78675e-26	-0.099319	0.307	0.452	1.41592e-21	P3.Epcell	DNMT1
PLEKHB1	8.40926e-26	-0.0951745	0.182	0.306	1.75442e-21	P3.Epcell	PLEKHB1
AIFM1	8.62345e-26	-0.0991188	0.364	0.519	1.79911e-21	P3.Epcell	AIFM1
CSAD	9.0438e-26	-0.0917928	0.143	0.252	1.88681e-21	P3.Epcell	CSAD
TRIM28	9.30658e-26	-0.117988	0.372	0.517	1.94163e-21	P3.Epcell	TRIM28
EGLN3	9.44601e-26	0.235748	0.453	0.353	1.97072e-21	P3.Epcell	EGLN3
MPHOSPH8	9.78097e-26	-0.108717	0.38	0.53	2.0406e-21	P3.Epcell	MPHOSPH8
LRRC48	1.10481e-25	-0.249156	0.254	0.366	2.30496e-21	P3.Epcell	LRRC48
ZKSCAN1	1.22628e-25	-0.134709	0.402	0.546	2.55839e-21	P3.Epcell	ZKSCAN1
COX7A2	1.33996e-25	0.135549	0.958	0.944	2.79557e-21	P3.Epcell	COX7A2
EPB41L2	1.56568e-25	-0.103282	0.277	0.414	3.26648e-21	P3.Epcell	EPB41L2
EZR	1.62603e-25	0.177807	0.895	0.866	3.39238e-21	P3.Epcell	EZR
UPF3A	1.65879e-25	-0.128794	0.406	0.547	3.46074e-21	P3.Epcell	UPF3A
MTRNR2L8	1.7618e-25	-0.172908	0.288	0.427	3.67563e-21	P3.Epcell	MTRNR2L8
SF1	1.79365e-25	-0.132161	0.547	0.688	3.74208e-21	P3.Epcell	SF1
MEIS1	1.86884e-25	-0.107877	0.293	0.431	3.89897e-21	P3.Epcell	MEIS1
BICD1	2.1533e-25	-0.0690364	0.174	0.296	4.49243e-21	P3.Epcell	BICD1
IFI27L2	2.17737e-25	-0.203365	0.334	0.459	4.54264e-21	P3.Epcell	IFI27L2
ISG20	2.95121e-25	0.232295	0.639	0.575	6.1571e-21	P3.Epcell	ISG20
VCAN	3.18321e-25	-0.0834759	0.197	0.327	6.64114e-21	P3.Epcell	VCAN
PHLDA3	3.27748e-25	0.243004	0.553	0.49	6.8378e-21	P3.Epcell	PHLDA3
NOP10	3.34864e-25	0.183828	0.885	0.881	6.98627e-21	P3.Epcell	NOP10
NKTR	3.41341e-25	-0.11295	0.429	0.578	7.12139e-21	P3.Epcell	NKTR
ARSD	3.94609e-25	-0.134592	0.36	0.499	8.23274e-21	P3.Epcell	ARSD
PHIP	3.96925e-25	-0.133827	0.449	0.594	8.28105e-21	P3.Epcell	PHIP
NDUFB2	6.11915e-25	0.145821	0.916	0.904	1.27664e-20	P3.Epcell	NDUFB2
DIS3L2	7.28423e-25	-0.0975467	0.151	0.263	1.51971e-20	P3.Epcell	DIS3L2
DUS1L	8.34823e-25	-0.0899828	0.246	0.372	1.74169e-20	P3.Epcell	DUS1L
NT5C3A	9.37731e-25	0.234355	0.486	0.407	1.95639e-20	P3.Epcell	NT5C3A
CDKN1A	9.67626e-25	0.289488	0.643	0.588	2.01876e-20	P3.Epcell	CDKN1A
SMYD2	9.96673e-25	-0.100216	0.295	0.431	2.07936e-20	P3.Epcell	SMYD2
FHAD1	1.0078e-24	-0.196593	0.251	0.364	2.10257e-20	P3.Epcell	FHAD1
SRCAP	1.03913e-24	0.211284	0.594	0.525	2.16794e-20	P3.Epcell	SRCAP
IER2	1.0864e-24	-0.233823	0.769	0.838	2.26657e-20	P3.Epcell	IER2
HIATL1	1.11891e-24	-0.118427	0.332	0.465	2.33438e-20	P3.Epcell	HIATL1
HOXB7	1.33033e-24	-0.128077	0.479	0.622	2.77547e-20	P3.Epcell	HOXB7
EEF1A1	1.36261e-24	-0.0538066	1	1	2.84281e-20	P3.Epcell	EEF1A1
AHCYL1	1.45369e-24	-0.169627	0.584	0.696	3.03283e-20	P3.Epcell	AHCYL1
UQCRQ	1.47502e-24	0.120272	0.981	0.979	3.07734e-20	P3.Epcell	UQCRQ
AHSA2	1.5951e-24	-0.0807203	0.159	0.269	3.32785e-20	P3.Epcell	AHSA2
METTL12	1.82389e-24	-0.0899169	0.177	0.292	3.80518e-20	P3.Epcell	METTL12
COL18A1	2.04698e-24	-0.1356	0.406	0.553	4.27062e-20	P3.Epcell	COL18A1
C9orf16	2.1141e-24	0.19881	0.818	0.804	4.41065e-20	P3.Epcell	C9orf16
PLCB4	2.46635e-24	-0.0684984	0.147	0.258	5.14555e-20	P3.Epcell	PLCB4
PKP2	2.62426e-24	-0.103626	0.255	0.386	5.475e-20	P3.Epcell	PKP2
GRAMD1A	3.01759e-24	-0.112539	0.32	0.455	6.2956e-20	P3.Epcell	GRAMD1A
CD320	3.46935e-24	-0.0815142	0.153	0.262	7.2381e-20	P3.Epcell	CD320
ELOVL5	3.79907e-24	-0.117465	0.346	0.476	7.92599e-20	P3.Epcell	ELOVL5
CRISP3	4.05512e-24	0.146006	0.338	0.216	8.4602e-20	P3.Epcell	CRISP3
LAD1	4.06856e-24	0.202353	0.577	0.514	8.48825e-20	P3.Epcell	LAD1
ETHE1	4.78141e-24	0.227794	0.507	0.446	9.97545e-20	P3.Epcell	ETHE1
GLTSCR2	4.93969e-24	-0.152349	0.775	0.869	1.03057e-19	P3.Epcell	GLTSCR2
FZD3	4.98485e-24	-0.0874471	0.232	0.358	1.03999e-19	P3.Epcell	FZD3
SMIM22	5.80909e-24	0.19061	0.931	0.929	1.21195e-19	P3.Epcell	SMIM22
LINC00152	6.31311e-24	0.252503	0.521	0.446	1.3171e-19	P3.Epcell	LINC00152
CCL4	6.97554e-24	-0.247821	0.56	0.671	1.45531e-19	P3.Epcell	CCL4
SLC7A2	7.32318e-24	0.15839	0.324	0.216	1.52784e-19	P3.Epcell	SLC7A2
FBLN1	8.47746e-24	-0.221184	0.164	0.274	1.76865e-19	P3.Epcell	FBLN1
PLEKHG1	8.67096e-24	-0.0902785	0.21	0.331	1.80902e-19	P3.Epcell	PLEKHG1
CTSZ	8.70888e-24	-0.14249	0.437	0.572	1.81693e-19	P3.Epcell	CTSZ
PRR13	8.93216e-24	0.189052	0.805	0.806	1.86352e-19	P3.Epcell	PRR13
ARGLU1	9.4312e-24	-0.138338	0.668	0.79	1.96763e-19	P3.Epcell	ARGLU1
LRP10	1.00295e-23	0.226389	0.538	0.491	2.09246e-19	P3.Epcell	LRP10
HIPK2	1.01212e-23	-0.110861	0.286	0.412	2.11158e-19	P3.Epcell	HIPK2
CD44	1.06672e-23	0.223672	0.619	0.549	2.2255e-19	P3.Epcell	CD44
PPAPDC1B	1.22623e-23	-0.13357	0.439	0.578	2.55829e-19	P3.Epcell	PPAPDC1B
SERF2	1.2463e-23	0.0985685	0.999	0.999	2.60016e-19	P3.Epcell	SERF2
HOXB8	1.31765e-23	-0.106655	0.326	0.463	2.74902e-19	P3.Epcell	HOXB8
HMGB1	1.50267e-23	-0.124708	0.949	0.978	3.13503e-19	P3.Epcell	HMGB1
MAP1B	1.5479e-23	-0.147223	0.169	0.28	3.22938e-19	P3.Epcell	MAP1B
ZNF33B	1.56001e-23	-0.084566	0.219	0.343	3.25464e-19	P3.Epcell	ZNF33B
VANGL1	1.74048e-23	-0.079817	0.168	0.278	3.63115e-19	P3.Epcell	VANGL1
PTPN14	1.80366e-23	-0.0844332	0.15	0.256	3.76299e-19	P3.Epcell	PTPN14
SNX2	1.82462e-23	0.19616	0.546	0.474	3.8067e-19	P3.Epcell	SNX2
DST	2.17614e-23	-0.0394783	0.407	0.566	4.54009e-19	P3.Epcell	DST
TMC4	2.41837e-23	-0.133648	0.5	0.64	5.04544e-19	P3.Epcell	TMC4
GPC4	2.45505e-23	-0.119541	0.155	0.258	5.12197e-19	P3.Epcell	GPC4
SPIN1	2.56993e-23	-0.124163	0.422	0.561	5.36164e-19	P3.Epcell	SPIN1
AHI1	2.61748e-23	-0.0951207	0.326	0.463	5.46084e-19	P3.Epcell	AHI1
MUM1	2.68434e-23	-0.099349	0.244	0.369	5.60035e-19	P3.Epcell	MUM1
SMC2	3.46745e-23	-0.141502	0.237	0.354	7.23413e-19	P3.Epcell	SMC2
COX14	3.48165e-23	0.190585	0.749	0.739	7.26377e-19	P3.Epcell	COX14
C3	3.51968e-23	0.29305	0.753	0.733	7.34311e-19	P3.Epcell	C3
TRNP1	3.55513e-23	0.234996	0.302	0.209	7.41708e-19	P3.Epcell	TRNP1
GLIS3	3.83299e-23	-0.120472	0.366	0.498	7.99676e-19	P3.Epcell	GLIS3
UQCRB	3.8957e-23	-0.0915453	0.963	0.986	8.12761e-19	P3.Epcell	UQCRB
GPNMB	3.98374e-23	-0.0668262	0.178	0.296	8.31129e-19	P3.Epcell	GPNMB
POMP	4.30747e-23	0.142828	0.927	0.919	8.98668e-19	P3.Epcell	POMP
QSOX1	4.42239e-23	0.254363	0.552	0.504	9.22643e-19	P3.Epcell	QSOX1
ABRACL	4.42545e-23	0.196824	0.778	0.776	9.23282e-19	P3.Epcell	ABRACL
NDRG1	4.6356e-23	0.252654	0.415	0.322	9.67125e-19	P3.Epcell	NDRG1
PERP	4.67828e-23	0.158667	0.909	0.898	9.76029e-19	P3.Epcell	PERP
HIF1A	5.45578e-23	0.198685	0.773	0.763	1.13824e-18	P3.Epcell	HIF1A
LAMB3	5.53931e-23	0.271268	0.517	0.427	1.15567e-18	P3.Epcell	LAMB3
NUDT3	5.7146e-23	-0.119177	0.384	0.519	1.19224e-18	P3.Epcell	NUDT3
TMEM109	5.86109e-23	-0.0633915	0.175	0.289	1.2228e-18	P3.Epcell	TMEM109
LMO7	6.44749e-23	0.225898	0.408	0.319	1.34514e-18	P3.Epcell	LMO7
BIK	7.31419e-23	0.201107	0.495	0.403	1.52596e-18	P3.Epcell	BIK
CTSD	8.82434e-23	0.278841	0.757	0.784	1.84102e-18	P3.Epcell	CTSD
STOX1	8.89985e-23	-0.129738	0.17	0.274	1.85678e-18	P3.Epcell	STOX1
ZC3H13	1.02017e-22	-0.0878787	0.349	0.49	2.12837e-18	P3.Epcell	ZC3H13
SMC4	1.044e-22	-0.0920939	0.206	0.323	2.17809e-18	P3.Epcell	SMC4
RHOV	1.12161e-22	0.209235	0.436	0.345	2.34002e-18	P3.Epcell	RHOV
TMEM131	1.17144e-22	-0.105129	0.296	0.422	2.44398e-18	P3.Epcell	TMEM131
TACC1	1.23458e-22	-0.0799066	0.155	0.261	2.5757e-18	P3.Epcell	TACC1
CDC16	1.37875e-22	-0.0853274	0.312	0.446	2.87648e-18	P3.Epcell	CDC16
IFT88	1.41763e-22	-0.117562	0.264	0.388	2.9576e-18	P3.Epcell	IFT88
PCCA	1.61224e-22	-0.0599344	0.177	0.293	3.36361e-18	P3.Epcell	PCCA
PTPN3	1.69833e-22	-0.0920885	0.287	0.416	3.54322e-18	P3.Epcell	PTPN3
PHYKPL	1.70636e-22	-0.0639637	0.171	0.283	3.55998e-18	P3.Epcell	PHYKPL
CTTN	2.11016e-22	0.231221	0.677	0.657	4.40242e-18	P3.Epcell	CTTN
TTC14	2.14354e-22	-0.0733661	0.188	0.302	4.47207e-18	P3.Epcell	TTC14
BCL9	2.64461e-22	-0.0559776	0.145	0.251	5.51745e-18	P3.Epcell	BCL9
CCDC11	2.69752e-22	-0.273966	0.274	0.373	5.62784e-18	P3.Epcell	CCDC11
BAG1	2.9287e-22	0.217258	0.608	0.575	6.11014e-18	P3.Epcell	BAG1
C1orf173	3.36552e-22	-0.201815	0.234	0.343	7.02149e-18	P3.Epcell	C1orf173
BCL2L15	3.72336e-22	0.151439	0.267	0.17	7.76805e-18	P3.Epcell	BCL2L15
FARP1	3.78219e-22	-0.0953486	0.334	0.467	7.89079e-18	P3.Epcell	FARP1
HMGB2	3.89832e-22	-0.15498	0.386	0.519	8.13307e-18	P3.Epcell	HMGB2
PRRC2B	4.06627e-22	-0.0999475	0.329	0.462	8.48346e-18	P3.Epcell	PRRC2B
SOX17	4.06662e-22	-0.23622	0.62	0.712	8.48419e-18	P3.Epcell	SOX17
CD69	4.10826e-22	-0.189291	0.267	0.384	8.57106e-18	P3.Epcell	CD69
PHF8	4.47885e-22	-0.0865385	0.156	0.257	9.34423e-18	P3.Epcell	PHF8
GBAS	5.84912e-22	-0.0902115	0.436	0.584	1.2203e-17	P3.Epcell	GBAS
NNT	6.00578e-22	-0.083232	0.162	0.266	1.25299e-17	P3.Epcell	NNT
SON	6.85608e-22	-0.134096	0.719	0.834	1.43038e-17	P3.Epcell	SON
ITGA6	7.47389e-22	-0.191518	0.418	0.534	1.55928e-17	P3.Epcell	ITGA6
RAB9A	7.67072e-22	0.166303	0.453	0.364	1.60034e-17	P3.Epcell	RAB9A
SERPING1	7.80711e-22	-0.174161	0.477	0.612	1.6288e-17	P3.Epcell	SERPING1
GNAI2	7.86244e-22	-0.121495	0.349	0.47	1.64034e-17	P3.Epcell	GNAI2
PNN	8.04671e-22	-0.104966	0.489	0.64	1.67878e-17	P3.Epcell	PNN
ASRGL1	8.81856e-22	-0.116605	0.826	0.888	1.83982e-17	P3.Epcell	ASRGL1
AKAP8L	8.86684e-22	-0.0826592	0.23	0.349	1.84989e-17	P3.Epcell	AKAP8L
CDC42SE1	8.95912e-22	0.291268	0.442	0.369	1.86914e-17	P3.Epcell	CDC42SE1
TSC22D1	1.02695e-21	-0.181553	0.851	0.832	2.14254e-17	P3.Epcell	TSC22D1
VDAC1	1.06046e-21	0.161652	0.808	0.804	2.21244e-17	P3.Epcell	VDAC1
PEMT	1.19099e-21	-0.100797	0.252	0.368	2.48475e-17	P3.Epcell	PEMT
RAB11A	1.36726e-21	0.162825	0.803	0.795	2.85252e-17	P3.Epcell	RAB11A
TP53I13	1.39503e-21	-0.0814414	0.211	0.325	2.91044e-17	P3.Epcell	TP53I13
CCDC146	1.50643e-21	-0.143116	0.528	0.645	3.14286e-17	P3.Epcell	CCDC146
HLTF	1.51004e-21	-0.0737637	0.165	0.272	3.15039e-17	P3.Epcell	HLTF
DSTN	1.70071e-21	0.149854	0.93	0.937	3.54819e-17	P3.Epcell	DSTN
CCDC66	2.09176e-21	-0.0971332	0.244	0.364	4.36404e-17	P3.Epcell	CCDC66
CARS2	2.24074e-21	-0.0804254	0.21	0.32	4.67485e-17	P3.Epcell	CARS2
TMEM59	2.2499e-21	0.180006	0.851	0.866	4.69396e-17	P3.Epcell	TMEM59
HNRNPU-AS1	2.41221e-21	-0.0758187	0.215	0.333	5.03259e-17	P3.Epcell	HNRNPU-AS1
PCF11	2.81069e-21	-0.0711438	0.17	0.277	5.86394e-17	P3.Epcell	PCF11
WBSCR27	2.9374e-21	0.177641	0.313	0.209	6.1283e-17	P3.Epcell	WBSCR27
MACROD2	3.35449e-21	0.201842	0.261	0.171	6.99847e-17	P3.Epcell	MACROD2
CNKSR3	3.4188e-21	-0.0867412	0.237	0.357	7.13264e-17	P3.Epcell	CNKSR3
MRPS31	3.62055e-21	-0.136867	0.263	0.379	7.55355e-17	P3.Epcell	MRPS31
ATXN2	3.98558e-21	-0.105271	0.33	0.459	8.31512e-17	P3.Epcell	ATXN2
CASZ1	4.47287e-21	-0.0881945	0.208	0.32	9.33176e-17	P3.Epcell	CASZ1
HNRNPA3	4.68851e-21	-0.126458	0.819	0.888	9.78164e-17	P3.Epcell	HNRNPA3
USP22	4.79741e-21	-0.0886235	0.298	0.426	1.00088e-16	P3.Epcell	USP22
NRIP1	4.82892e-21	-0.0922147	0.291	0.412	1.00746e-16	P3.Epcell	NRIP1
VAMP8	4.87285e-21	0.163437	0.859	0.874	1.01662e-16	P3.Epcell	VAMP8
RP11-620J15.3	4.98475e-21	-0.139731	0.231	0.346	1.03997e-16	P3.Epcell	RP11-620J15.3
YIF1B	5.2652e-21	-0.0701807	0.175	0.28	1.09848e-16	P3.Epcell	YIF1B
DUSP6	5.58228e-21	-0.107237	0.285	0.409	1.16463e-16	P3.Epcell	DUSP6
JAG1	5.71132e-21	-0.146795	0.315	0.432	1.19155e-16	P3.Epcell	JAG1
GPR125	5.72583e-21	-0.095675	0.205	0.313	1.19458e-16	P3.Epcell	GPR125
SLC25A29	5.78798e-21	-0.114686	0.412	0.545	1.20755e-16	P3.Epcell	SLC25A29
KIAA0907	6.46872e-21	-0.0872166	0.277	0.403	1.34957e-16	P3.Epcell	KIAA0907
JADE1	6.8625e-21	-0.0744032	0.171	0.275	1.43172e-16	P3.Epcell	JADE1
SSBP3	7.25792e-21	-0.111824	0.33	0.453	1.51422e-16	P3.Epcell	SSBP3
ATP2C1	8.50491e-21	-0.104414	0.413	0.547	1.77438e-16	P3.Epcell	ATP2C1
UBXN4	9.26424e-21	-0.117314	0.7	0.8	1.9328e-16	P3.Epcell	UBXN4
FLOT1	9.86241e-21	-0.0989028	0.515	0.654	2.05759e-16	P3.Epcell	FLOT1
RARRES2	9.93553e-21	0.186496	0.357	0.262	2.07285e-16	P3.Epcell	RARRES2
MSI2	1.02269e-20	-0.117838	0.438	0.575	2.13364e-16	P3.Epcell	MSI2
TSC2	1.09856e-20	-0.073017	0.176	0.28	2.29193e-16	P3.Epcell	TSC2
C8orf4	1.10941e-20	0.136868	0.789	0.705	2.31457e-16	P3.Epcell	C8orf4
MFHAS1	1.23261e-20	-0.0791373	0.24	0.356	2.57159e-16	P3.Epcell	MFHAS1
TSTD1	1.34571e-20	-0.154898	0.677	0.778	2.80754e-16	P3.Epcell	TSTD1
SRSF4	1.60265e-20	-0.10114	0.399	0.528	3.34361e-16	P3.Epcell	SRSF4
KRTCAP2	1.69089e-20	-0.120848	0.622	0.76	3.5277e-16	P3.Epcell	KRTCAP2
ADAM28	1.70676e-20	-0.0859484	0.187	0.293	3.56082e-16	P3.Epcell	ADAM28
ALDH3A2	1.76949e-20	-0.0951985	0.353	0.482	3.6917e-16	P3.Epcell	ALDH3A2
CKS1B	1.94289e-20	-0.113883	0.353	0.482	4.05345e-16	P3.Epcell	CKS1B
SPEF2	2.00293e-20	-0.149761	0.262	0.373	4.17872e-16	P3.Epcell	SPEF2
C21orf2	2.11912e-20	-0.0671939	0.219	0.333	4.42112e-16	P3.Epcell	C21orf2
RRAGA	2.29781e-20	-0.103654	0.383	0.513	4.79392e-16	P3.Epcell	RRAGA
DBI	2.51017e-20	0.187042	0.84	0.836	5.23696e-16	P3.Epcell	DBI
TIMM13	2.6131e-20	0.155506	0.723	0.691	5.45171e-16	P3.Epcell	TIMM13
ZNF667-AS1	3.21603e-20	-0.0730895	0.251	0.371	6.7096e-16	P3.Epcell	ZNF667-AS1
FGFR1	3.2171e-20	-0.0757262	0.19	0.298	6.71183e-16	P3.Epcell	FGFR1
ZNF516	3.24419e-20	-0.066391	0.213	0.33	6.76835e-16	P3.Epcell	ZNF516
PALLD	3.41496e-20	-0.0972289	0.403	0.538	7.12464e-16	P3.Epcell	PALLD
HCG18	3.55294e-20	-0.0669132	0.181	0.288	7.4125e-16	P3.Epcell	HCG18
ECHDC2	4.57946e-20	-0.104441	0.383	0.514	9.55413e-16	P3.Epcell	ECHDC2
FABP5	4.59769e-20	0.313575	0.348	0.263	9.59216e-16	P3.Epcell	FABP5
S100A14	4.78487e-20	0.150175	0.3	0.203	9.98267e-16	P3.Epcell	S100A14
SLC39A4	4.83865e-20	-0.0809659	0.352	0.484	1.00949e-15	P3.Epcell	SLC39A4
HES6	5.06643e-20	-0.0747832	0.188	0.293	1.05701e-15	P3.Epcell	HES6
TCEA2	5.45169e-20	-0.0748406	0.217	0.329	1.13739e-15	P3.Epcell	TCEA2
PSME1	5.59631e-20	0.153933	0.89	0.888	1.16756e-15	P3.Epcell	PSME1
RBBP8	5.75861e-20	-0.116844	0.373	0.499	1.20142e-15	P3.Epcell	RBBP8
TFF3	6.38377e-20	0.195862	0.748	0.679	1.33184e-15	P3.Epcell	TFF3
IQGAP2	6.41466e-20	-0.0950161	0.363	0.493	1.33829e-15	P3.Epcell	IQGAP2
CCDC34	6.41906e-20	-0.112413	0.303	0.427	1.33921e-15	P3.Epcell	CCDC34
SOD3	6.5733e-20	-0.633994	0.208	0.299	1.37139e-15	P3.Epcell	SOD3
MYADM	6.94925e-20	-0.104068	0.372	0.506	1.44982e-15	P3.Epcell	MYADM
AKAP7	7.08595e-20	-0.0706899	0.272	0.399	1.47834e-15	P3.Epcell	AKAP7
VOPP1	8.26319e-20	-0.0845363	0.315	0.44	1.72395e-15	P3.Epcell	VOPP1
TRIM33	8.96134e-20	-0.0930171	0.346	0.474	1.8696e-15	P3.Epcell	TRIM33
CTNNAL1	9.12616e-20	-0.0775335	0.26	0.384	1.90399e-15	P3.Epcell	CTNNAL1
KIDINS220	9.33792e-20	-0.0614359	0.202	0.313	1.94817e-15	P3.Epcell	KIDINS220
BTG1	9.37874e-20	0.201526	0.807	0.804	1.95669e-15	P3.Epcell	BTG1
IQCD	9.43573e-20	0.205185	0.395	0.302	1.96858e-15	P3.Epcell	IQCD
MT1G	9.7427e-20	0.0118731	0.172	0.283	2.03262e-15	P3.Epcell	MT1G
C1orf56	1.03268e-19	0.31596	0.365	0.289	2.15448e-15	P3.Epcell	C1orf56
B4GALNT3	1.14975e-19	-0.0765407	0.168	0.267	2.39872e-15	P3.Epcell	B4GALNT3
RP11-349A22.5	1.232e-19	-0.0769968	0.351	0.486	2.57032e-15	P3.Epcell	RP11-349A22.5
PVRL4	1.27864e-19	0.14706	0.309	0.216	2.66762e-15	P3.Epcell	PVRL4
ELP5	1.32227e-19	-0.0570718	0.229	0.346	2.75865e-15	P3.Epcell	ELP5
PTPN4	1.41292e-19	-0.069569	0.206	0.315	2.94777e-15	P3.Epcell	PTPN4
CLUAP1	1.41457e-19	-0.123082	0.345	0.465	2.95122e-15	P3.Epcell	CLUAP1
MTRNR2L1	1.47576e-19	-0.131448	0.249	0.355	3.07888e-15	P3.Epcell	MTRNR2L1
DCDC2	1.47788e-19	-0.174862	0.474	0.595	3.08329e-15	P3.Epcell	DCDC2
NNMT	1.61373e-19	0.303253	0.402	0.305	3.36672e-15	P3.Epcell	NNMT
ABCD4	1.65272e-19	-0.0759019	0.231	0.345	3.44807e-15	P3.Epcell	ABCD4
ACAT1	1.70011e-19	-0.0888078	0.27	0.39	3.54694e-15	P3.Epcell	ACAT1
SPAG16	1.73883e-19	-0.144371	0.354	0.468	3.62773e-15	P3.Epcell	SPAG16
ANKRD37	1.91933e-19	0.202147	0.562	0.483	4.00429e-15	P3.Epcell	ANKRD37
WDR49	1.99947e-19	-0.117701	0.162	0.259	4.17149e-15	P3.Epcell	WDR49
PSMA5	2.00071e-19	0.167109	0.715	0.681	4.17408e-15	P3.Epcell	PSMA5
TSGA10	2.09842e-19	-0.131953	0.258	0.369	4.37794e-15	P3.Epcell	TSGA10
BANF1	2.12783e-19	-0.13691	0.761	0.841	4.4393e-15	P3.Epcell	BANF1
DPM3	2.27466e-19	-0.11477	0.526	0.658	4.74562e-15	P3.Epcell	DPM3
ARF4	2.28627e-19	0.148753	0.81	0.81	4.76985e-15	P3.Epcell	ARF4
PCBP2	2.35402e-19	-0.117267	0.818	0.887	4.91119e-15	P3.Epcell	PCBP2
GDF15	2.58547e-19	0.145409	0.682	0.608	5.39406e-15	P3.Epcell	GDF15
ZC2HC1A	2.79357e-19	-0.0671729	0.203	0.315	5.82823e-15	P3.Epcell	ZC2HC1A
TM2D1	2.89867e-19	-0.0880116	0.38	0.512	6.0475e-15	P3.Epcell	TM2D1
MBTPS1	2.93102e-19	-0.0818303	0.334	0.457	6.11499e-15	P3.Epcell	MBTPS1
PLAC8	4.33464e-19	0.334977	0.362	0.281	9.04336e-15	P3.Epcell	PLAC8
GDI1	4.63242e-19	-0.0898391	0.229	0.338	9.66463e-15	P3.Epcell	GDI1
CCNL1	4.71952e-19	-0.15466	0.599	0.72	9.84633e-15	P3.Epcell	CCNL1
SAT1	4.87658e-19	0.0980264	1	1	1.0174e-14	P3.Epcell	SAT1
GAS8	5.38126e-19	-0.0787549	0.17	0.27	1.12269e-14	P3.Epcell	GAS8
MLLT6	5.52679e-19	-0.0666583	0.215	0.324	1.15306e-14	P3.Epcell	MLLT6
DUSP5	6.0911e-19	0.0859804	0.334	0.231	1.27079e-14	P3.Epcell	DUSP5
SUMF2	7.05666e-19	0.256273	0.613	0.569	1.47223e-14	P3.Epcell	SUMF2
MGAT1	7.08743e-19	-0.0670757	0.245	0.359	1.47865e-14	P3.Epcell	MGAT1
DEK	7.12238e-19	-0.125864	0.52	0.636	1.48594e-14	P3.Epcell	DEK
TMEM260	7.82388e-19	-0.0547217	0.204	0.308	1.6323e-14	P3.Epcell	TMEM260
CLEC11A	8.15245e-19	-0.0585331	0.155	0.251	1.70085e-14	P3.Epcell	CLEC11A
SLC41A3	8.22942e-19	-0.0694917	0.188	0.29	1.7169e-14	P3.Epcell	SLC41A3
MYLIP	8.47704e-19	-0.097136	0.324	0.447	1.76857e-14	P3.Epcell	MYLIP
SDCBP	8.65475e-19	0.164263	0.79	0.794	1.80564e-14	P3.Epcell	SDCBP
ELP3	8.8038e-19	-0.0125796	0.34	0.483	1.83674e-14	P3.Epcell	ELP3
TDRP	9.30057e-19	-0.0881337	0.158	0.251	1.94038e-14	P3.Epcell	TDRP
KIAA1377	9.69832e-19	-0.149768	0.204	0.298	2.02336e-14	P3.Epcell	KIAA1377
PILRB	9.75157e-19	-0.0714378	0.192	0.295	2.03447e-14	P3.Epcell	PILRB
RBM26	1.07003e-18	-0.0793658	0.271	0.384	2.2324e-14	P3.Epcell	RBM26
TMEM261	1.08677e-18	0.164151	0.669	0.64	2.26733e-14	P3.Epcell	TMEM261
DHRS7	1.12318e-18	-0.0950544	0.361	0.491	2.34328e-14	P3.Epcell	DHRS7
EPC1	1.1896e-18	-0.0804736	0.301	0.419	2.48186e-14	P3.Epcell	EPC1
SORL1	1.22754e-18	-0.0874413	0.379	0.508	2.56103e-14	P3.Epcell	SORL1
PHPT1	1.28567e-18	-0.121789	0.8	0.879	2.68229e-14	P3.Epcell	PHPT1
ZBTB38	1.33413e-18	-0.060715	0.324	0.457	2.7834e-14	P3.Epcell	ZBTB38
ANXA11	1.34661e-18	0.146995	0.8	0.796	2.80943e-14	P3.Epcell	ANXA11
MANSC1	1.37543e-18	-0.0769467	0.201	0.303	2.86956e-14	P3.Epcell	MANSC1
AK1	1.38354e-18	0.145156	0.547	0.497	2.88648e-14	P3.Epcell	AK1
AKAP9	1.4314e-18	-0.170938	0.603	0.728	2.98633e-14	P3.Epcell	AKAP9
RYK	1.44556e-18	-0.0638949	0.233	0.344	3.01587e-14	P3.Epcell	RYK
RFX3	1.47094e-18	-0.130241	0.311	0.431	3.06883e-14	P3.Epcell	RFX3
RDH11	1.66564e-18	-0.0780436	0.265	0.379	3.47501e-14	P3.Epcell	RDH11
DPP7	1.76916e-18	-0.0901343	0.438	0.574	3.69099e-14	P3.Epcell	DPP7
DNAH7	1.79936e-18	-0.145453	0.243	0.343	3.75401e-14	P3.Epcell	DNAH7
APMAP	2.03016e-18	-0.0777917	0.267	0.379	4.23552e-14	P3.Epcell	APMAP
EVL	2.11436e-18	-0.0802783	0.337	0.463	4.41119e-14	P3.Epcell	EVL
ZNF787	2.17748e-18	-0.0690682	0.177	0.274	4.54288e-14	P3.Epcell	ZNF787
GSTP1	2.37212e-18	0.131876	0.992	0.991	4.94896e-14	P3.Epcell	GSTP1
TAF10	2.52709e-18	-0.0783458	0.331	0.457	5.27226e-14	P3.Epcell	TAF10
SEPP1	2.56656e-18	-0.108185	0.364	0.487	5.35462e-14	P3.Epcell	SEPP1
TMPO	2.65179e-18	-0.0610593	0.271	0.389	5.53244e-14	P3.Epcell	TMPO
JUND	2.69743e-18	-0.19131	0.725	0.82	5.62764e-14	P3.Epcell	JUND
PLP2	2.80982e-18	-0.123412	0.423	0.542	5.86213e-14	P3.Epcell	PLP2
CSNK1E	2.8668e-18	-0.103865	0.415	0.544	5.98101e-14	P3.Epcell	CSNK1E
DLX6	2.99308e-18	-0.0565703	0.159	0.257	6.24446e-14	P3.Epcell	DLX6
PSMB5	3.01827e-18	0.156304	0.789	0.776	6.29701e-14	P3.Epcell	PSMB5
DDX39B	3.25189e-18	-0.0609594	0.178	0.28	6.78442e-14	P3.Epcell	DDX39B
PPP1R10	3.46897e-18	-0.0574628	0.264	0.384	7.23731e-14	P3.Epcell	PPP1R10
SEPW1	3.58209e-18	0.17313	0.864	0.854	7.47331e-14	P3.Epcell	SEPW1
PDXK	3.90207e-18	0.172769	0.572	0.52	8.14089e-14	P3.Epcell	PDXK
ILF3	4.37541e-18	-0.0901548	0.491	0.62	9.12841e-14	P3.Epcell	ILF3
RXFP1	4.80808e-18	-0.0814302	0.165	0.262	1.00311e-13	P3.Epcell	RXFP1
RNPS1	4.89116e-18	-0.0912362	0.472	0.603	1.02044e-13	P3.Epcell	RNPS1
FOXC1	5.15999e-18	0.145883	0.264	0.179	1.07653e-13	P3.Epcell	FOXC1
ENAH	5.45851e-18	-0.154595	0.503	0.618	1.13881e-13	P3.Epcell	ENAH
DNAH12	5.55561e-18	-0.171724	0.212	0.306	1.15907e-13	P3.Epcell	DNAH12
PATZ1	5.57917e-18	-0.046761	0.16	0.259	1.16398e-13	P3.Epcell	PATZ1
ZSCAN18	5.65583e-18	-0.078318	0.284	0.401	1.17998e-13	P3.Epcell	ZSCAN18
VAMP2	5.94072e-18	-0.0936225	0.362	0.487	1.23941e-13	P3.Epcell	VAMP2
UGP2	6.33439e-18	0.168796	0.606	0.567	1.32154e-13	P3.Epcell	UGP2
C5orf45	6.88545e-18	-0.0748804	0.22	0.327	1.43651e-13	P3.Epcell	C5orf45
OCEL1	6.99348e-18	-0.0945956	0.347	0.466	1.45905e-13	P3.Epcell	OCEL1
UBN2	7.0637e-18	-0.0858376	0.234	0.334	1.4737e-13	P3.Epcell	UBN2
PPIC	7.21249e-18	0.16673	0.669	0.653	1.50474e-13	P3.Epcell	PPIC
ARPC5	7.33378e-18	0.152103	0.738	0.718	1.53005e-13	P3.Epcell	ARPC5
HNRNPD	8.01026e-18	-0.10567	0.562	0.685	1.67118e-13	P3.Epcell	HNRNPD
SLC35E2B	8.07853e-18	-0.0610281	0.19	0.291	1.68542e-13	P3.Epcell	SLC35E2B
TPRKB	8.34456e-18	-0.0929863	0.398	0.52	1.74093e-13	P3.Epcell	TPRKB
CTSL	8.4085e-18	-0.105805	0.305	0.418	1.75426e-13	P3.Epcell	CTSL
CWF19L2	8.68176e-18	-0.0580805	0.187	0.29	1.81127e-13	P3.Epcell	CWF19L2
ECI1	9.65063e-18	-0.101141	0.407	0.524	2.01341e-13	P3.Epcell	ECI1
ID1	9.94558e-18	-0.255998	0.699	0.767	2.07495e-13	P3.Epcell	ID1
B3GAT3	1.01222e-17	-0.0595042	0.213	0.317	2.1118e-13	P3.Epcell	B3GAT3
AGO3	1.02173e-17	-0.0658855	0.175	0.271	2.13163e-13	P3.Epcell	AGO3
HSP90AA1	1.02198e-17	-0.200192	0.984	0.98	2.13216e-13	P3.Epcell	HSP90AA1
CREB5	1.04314e-17	-0.0988084	0.229	0.33	2.17631e-13	P3.Epcell	CREB5
RPS27A	1.05264e-17	0.0864321	0.999	0.996	2.19613e-13	P3.Epcell	RPS27A
CABIN1	1.0828e-17	-0.0847614	0.229	0.331	2.25905e-13	P3.Epcell	CABIN1
ALG8	1.19295e-17	-0.0541599	0.158	0.252	2.48885e-13	P3.Epcell	ALG8
CNOT2	1.22799e-17	-0.0728011	0.348	0.469	2.56195e-13	P3.Epcell	CNOT2
AGPS	1.30821e-17	-0.0793273	0.255	0.367	2.72931e-13	P3.Epcell	AGPS
TAGLN2	1.33695e-17	0.154739	0.886	0.9	2.78929e-13	P3.Epcell	TAGLN2
FBXO21	1.33775e-17	-0.111837	0.324	0.435	2.79096e-13	P3.Epcell	FBXO21
TMEM245	1.34363e-17	-0.0739468	0.212	0.315	2.80321e-13	P3.Epcell	TMEM245
HOXB5	1.4545e-17	-0.100643	0.295	0.405	3.03453e-13	P3.Epcell	HOXB5
RPL41	1.65391e-17	0.093629	1	1	3.45055e-13	P3.Epcell	RPL41
SUGP2	1.72748e-17	-0.076534	0.253	0.356	3.60404e-13	P3.Epcell	SUGP2
CSRP2	1.78413e-17	-0.123295	0.309	0.421	3.72224e-13	P3.Epcell	CSRP2
RPS11	1.80219e-17	-0.117686	0.992	0.996	3.75992e-13	P3.Epcell	RPS11
KMT2C	1.89683e-17	-0.0714842	0.42	0.55	3.95736e-13	P3.Epcell	KMT2C
CNPY3	2.12332e-17	-0.0877666	0.372	0.494	4.42989e-13	P3.Epcell	CNPY3
SLC25A5	2.44091e-17	0.162681	0.82	0.816	5.09246e-13	P3.Epcell	SLC25A5
CNTRL	2.48288e-17	-0.0860529	0.177	0.271	5.18002e-13	P3.Epcell	CNTRL
ATF6B	2.50936e-17	-0.0675408	0.298	0.416	5.23527e-13	P3.Epcell	ATF6B
RBM38	2.65305e-17	-0.143524	0.282	0.379	5.53505e-13	P3.Epcell	RBM38
OST4	2.70607e-17	0.119965	0.953	0.955	5.64567e-13	P3.Epcell	OST4
IFI27L1	2.75515e-17	-0.0699814	0.191	0.289	5.74807e-13	P3.Epcell	IFI27L1
CADM1	2.76985e-17	-0.122271	0.403	0.517	5.77873e-13	P3.Epcell	CADM1
SCGB1D2	3.04755e-17	-0.296977	0.767	0.825	6.3581e-13	P3.Epcell	SCGB1D2
HEXA	3.51998e-17	-0.0670581	0.324	0.446	7.34372e-13	P3.Epcell	HEXA
MLLT4	3.5206e-17	-0.118159	0.561	0.679	7.34502e-13	P3.Epcell	MLLT4
AC159540.1	3.913e-17	-0.0921303	0.186	0.28	8.1637e-13	P3.Epcell	AC159540.1
SMIM19	4.16888e-17	-0.105855	0.484	0.609	8.69753e-13	P3.Epcell	SMIM19
BTBD7	4.20386e-17	-0.062155	0.252	0.361	8.77051e-13	P3.Epcell	BTBD7
RABL2B	4.21018e-17	-0.157366	0.329	0.432	8.78371e-13	P3.Epcell	RABL2B
KCNQ1OT1	4.47673e-17	-0.0634877	0.259	0.365	9.33979e-13	P3.Epcell	KCNQ1OT1
SRSF5	4.56646e-17	-0.112422	0.666	0.772	9.527e-13	P3.Epcell	SRSF5
LAP3	4.8941e-17	0.191119	0.516	0.457	1.02106e-12	P3.Epcell	LAP3
NAMPT	5.03491e-17	0.180687	0.524	0.461	1.05043e-12	P3.Epcell	NAMPT
TAF1D	5.24981e-17	-0.102219	0.556	0.683	1.09527e-12	P3.Epcell	TAF1D
KLF5	5.27701e-17	0.162702	0.703	0.675	1.10094e-12	P3.Epcell	KLF5
TMEM30B	5.35996e-17	-0.0736918	0.249	0.358	1.11825e-12	P3.Epcell	TMEM30B
MAGI1	5.48712e-17	-0.0732461	0.236	0.341	1.14478e-12	P3.Epcell	MAGI1
CDHR3	5.5321e-17	-0.17619	0.243	0.338	1.15416e-12	P3.Epcell	CDHR3
CLSTN1	5.76466e-17	-0.0978569	0.343	0.459	1.20268e-12	P3.Epcell	CLSTN1
PPT1	5.9306e-17	-0.081728	0.221	0.321	1.2373e-12	P3.Epcell	PPT1
LNPEP	6.00051e-17	-0.0619683	0.225	0.328	1.25189e-12	P3.Epcell	LNPEP
EBAG9	6.00338e-17	-0.0837435	0.327	0.438	1.25248e-12	P3.Epcell	EBAG9
HNRNPA2B1	6.00741e-17	-0.0848313	0.9	0.959	1.25333e-12	P3.Epcell	HNRNPA2B1
SNRNP70	6.3278e-17	-0.10187	0.587	0.705	1.32017e-12	P3.Epcell	SNRNP70
SOCS4	6.38568e-17	-0.0506785	0.17	0.266	1.33224e-12	P3.Epcell	SOCS4
ZNF655	7.30318e-17	-0.0542688	0.194	0.294	1.52366e-12	P3.Epcell	ZNF655
PAK1	7.87843e-17	-0.0696115	0.292	0.408	1.64368e-12	P3.Epcell	PAK1
CCDC114	8.46485e-17	-0.14506	0.202	0.291	1.76602e-12	P3.Epcell	CCDC114
ARID2	8.63132e-17	-0.0585844	0.199	0.3	1.80075e-12	P3.Epcell	ARID2
CELF1	9.16433e-17	-0.101606	0.461	0.584	1.91195e-12	P3.Epcell	CELF1
RP11-304L19.5	9.5338e-17	-0.0655686	0.165	0.259	1.98904e-12	P3.Epcell	RP11-304L19.5
TM4SF1	1.03957e-16	0.0973872	0.632	0.545	2.16885e-12	P3.Epcell	TM4SF1
NDNL2	1.07446e-16	-0.0841598	0.216	0.315	2.24165e-12	P3.Epcell	NDNL2
RAB40B	1.08828e-16	0.134496	0.266	0.187	2.27047e-12	P3.Epcell	RAB40B
RCAN1	1.19696e-16	-0.195703	0.361	0.475	2.49722e-12	P3.Epcell	RCAN1
MAP4	1.22431e-16	-0.092432	0.403	0.524	2.55427e-12	P3.Epcell	MAP4
ODF2L	1.26388e-16	-0.125206	0.6	0.707	2.63683e-12	P3.Epcell	ODF2L
CDK4	1.27618e-16	-0.061642	0.291	0.405	2.6625e-12	P3.Epcell	CDK4
TERF1	1.28887e-16	-0.0585058	0.219	0.319	2.68896e-12	P3.Epcell	TERF1
TRIM2	1.40251e-16	-0.133369	0.561	0.665	2.92606e-12	P3.Epcell	TRIM2
CCDC50	1.42565e-16	-0.0839449	0.341	0.455	2.97433e-12	P3.Epcell	CCDC50
TMEM54	1.69868e-16	0.184987	0.326	0.253	3.54395e-12	P3.Epcell	TMEM54
PTOV1	1.70699e-16	-0.101781	0.534	0.657	3.5613e-12	P3.Epcell	PTOV1
H2AFY2	1.76956e-16	-0.0734993	0.278	0.383	3.69183e-12	P3.Epcell	H2AFY2
CPNE2	1.87396e-16	-0.0675236	0.197	0.292	3.90964e-12	P3.Epcell	CPNE2
RPL31	1.88669e-16	-0.0854402	0.999	1	3.9362e-12	P3.Epcell	RPL31
MGST2	1.99055e-16	-0.125437	0.641	0.754	4.15289e-12	P3.Epcell	MGST2
ARID1A	2.30352e-16	-0.0525395	0.214	0.315	4.80583e-12	P3.Epcell	ARID1A
USF2	2.41018e-16	-0.0680484	0.26	0.366	5.02835e-12	P3.Epcell	USF2
COIL	2.55883e-16	-0.0429642	0.208	0.308	5.33849e-12	P3.Epcell	COIL
RANGRF	2.67299e-16	-0.113352	0.299	0.406	5.57665e-12	P3.Epcell	RANGRF
LARP1	2.81553e-16	-0.0811109	0.412	0.534	5.87403e-12	P3.Epcell	LARP1
C9orf117	3.13545e-16	-0.25016	0.327	0.418	6.54149e-12	P3.Epcell	C9orf117
B4GALT1	3.28916e-16	0.303376	0.665	0.638	6.86218e-12	P3.Epcell	B4GALT1
GCNT2	3.43614e-16	-0.084494	0.272	0.377	7.16883e-12	P3.Epcell	GCNT2
FUS	3.54335e-16	-0.106819	0.58	0.687	7.3925e-12	P3.Epcell	FUS
IMMP1L	3.7501e-16	-0.0516394	0.251	0.362	7.82383e-12	P3.Epcell	IMMP1L
LAMP2	3.92476e-16	-0.109232	0.537	0.658	8.18822e-12	P3.Epcell	LAMP2
CTBP1	4.13232e-16	-0.0646227	0.298	0.412	8.62126e-12	P3.Epcell	CTBP1
NELFCD	4.22603e-16	-0.0565421	0.275	0.385	8.81677e-12	P3.Epcell	NELFCD
CPM	4.95211e-16	-0.134579	0.317	0.418	1.03316e-11	P3.Epcell	CPM
HERPUD1	5.2377e-16	-0.108943	0.604	0.72	1.09274e-11	P3.Epcell	HERPUD1
CPD	5.4998e-16	0.260846	0.527	0.498	1.14742e-11	P3.Epcell	CPD
SMARCA4	5.58813e-16	-0.0869844	0.431	0.552	1.16585e-11	P3.Epcell	SMARCA4
AARS	5.91403e-16	-0.0644871	0.213	0.311	1.23384e-11	P3.Epcell	AARS
IDH2	5.95771e-16	0.160539	0.789	0.788	1.24296e-11	P3.Epcell	IDH2
IDO1	6.16188e-16	0.247131	0.443	0.364	1.28555e-11	P3.Epcell	IDO1
HOOK2	6.1973e-16	-0.0906351	0.409	0.528	1.29294e-11	P3.Epcell	HOOK2
HOXB6	6.43595e-16	-0.125411	0.533	0.644	1.34273e-11	P3.Epcell	HOXB6
MAST4	6.76302e-16	-0.0790622	0.317	0.43	1.41097e-11	P3.Epcell	MAST4
TALDO1	6.95386e-16	0.156208	0.772	0.771	1.45078e-11	P3.Epcell	TALDO1
HN1	7.40494e-16	0.144755	0.75	0.738	1.54489e-11	P3.Epcell	HN1
DGKH	7.43099e-16	-0.0680648	0.317	0.432	1.55033e-11	P3.Epcell	DGKH
LGR4	7.9837e-16	-0.0717757	0.259	0.363	1.66564e-11	P3.Epcell	LGR4
NXNL2	8.508e-16	-0.110752	0.24	0.336	1.77502e-11	P3.Epcell	NXNL2
HGSNAT	8.56201e-16	-0.0709116	0.218	0.315	1.78629e-11	P3.Epcell	HGSNAT
TMEM67	8.66472e-16	-0.130801	0.275	0.372	1.80772e-11	P3.Epcell	TMEM67
PHF10	8.69134e-16	-0.0546622	0.164	0.252	1.81327e-11	P3.Epcell	PHF10
GPATCH8	8.88976e-16	-0.0577821	0.243	0.346	1.85467e-11	P3.Epcell	GPATCH8
NAP1L1	8.96437e-16	-0.102264	0.802	0.875	1.87024e-11	P3.Epcell	NAP1L1
CSPP1	9.02421e-16	-0.128805	0.306	0.406	1.88272e-11	P3.Epcell	CSPP1
PRR15	9.53768e-16	-0.0733582	0.391	0.505	1.98985e-11	P3.Epcell	PRR15
ANXA1	9.75856e-16	0.0832737	0.969	0.961	2.03593e-11	P3.Epcell	ANXA1
SIGIRR	9.88046e-16	-0.0959443	0.412	0.525	2.06136e-11	P3.Epcell	SIGIRR
MUC13	1.00731e-15	0.15294	0.336	0.248	2.10155e-11	P3.Epcell	MUC13
UGT2B7	1.05126e-15	-0.114055	0.453	0.567	2.19324e-11	P3.Epcell	UGT2B7
ATP6V0D1	1.22329e-15	0.166011	0.578	0.537	2.55214e-11	P3.Epcell	ATP6V0D1
GAA	1.24301e-15	-0.0492492	0.177	0.269	2.59329e-11	P3.Epcell	GAA
TTC18	1.29367e-15	-0.103018	0.202	0.29	2.69898e-11	P3.Epcell	TTC18
MTA3	1.30211e-15	-0.0690019	0.3	0.412	2.7166e-11	P3.Epcell	MTA3
SIPA1L1	1.40662e-15	-0.0524295	0.219	0.317	2.93463e-11	P3.Epcell	SIPA1L1
FAM227A	1.40822e-15	-0.134731	0.248	0.341	2.93796e-11	P3.Epcell	FAM227A
WFDC2	1.45035e-15	0.134509	0.994	0.998	3.02586e-11	P3.Epcell	WFDC2
GUSB	1.45397e-15	-0.0515305	0.202	0.299	3.03342e-11	P3.Epcell	GUSB
PTPRS	1.51605e-15	0.17663	0.364	0.286	3.16294e-11	P3.Epcell	PTPRS
ACSL5	1.62022e-15	-0.0713554	0.253	0.353	3.38027e-11	P3.Epcell	ACSL5
RHBDD2	1.70277e-15	-0.0916873	0.38	0.491	3.55249e-11	P3.Epcell	RHBDD2
SLC7A5	1.80893e-15	-0.0607183	0.215	0.313	3.77396e-11	P3.Epcell	SLC7A5
CCDC17	1.81291e-15	-0.144549	0.229	0.319	3.78228e-11	P3.Epcell	CCDC17
HIBCH	1.82505e-15	-0.0612569	0.26	0.366	3.80759e-11	P3.Epcell	HIBCH
RPL26L1	1.91935e-15	-0.0974826	0.519	0.636	4.00434e-11	P3.Epcell	RPL26L1
CELSR1	1.95396e-15	-0.0697035	0.284	0.39	4.07655e-11	P3.Epcell	CELSR1
PAWR	1.98615e-15	-0.0734588	0.366	0.482	4.1437e-11	P3.Epcell	PAWR
RBMX	2.10962e-15	-0.0989052	0.565	0.685	4.4013e-11	P3.Epcell	RBMX
GATAD1	2.13341e-15	-0.0523523	0.234	0.334	4.45093e-11	P3.Epcell	GATAD1
OFD1	2.24716e-15	-0.066493	0.471	0.602	4.68826e-11	P3.Epcell	OFD1
ATRAID	2.35072e-15	-0.115071	0.573	0.686	4.90431e-11	P3.Epcell	ATRAID
VEZF1	2.36108e-15	-0.09361	0.398	0.509	4.92592e-11	P3.Epcell	VEZF1
ZNF280D	2.45006e-15	-0.043838	0.195	0.292	5.11157e-11	P3.Epcell	ZNF280D
TIA1	2.67851e-15	-0.0672523	0.331	0.444	5.58818e-11	P3.Epcell	TIA1
CSNK1G1	2.7833e-15	-0.0626583	0.207	0.3	5.8068e-11	P3.Epcell	CSNK1G1
CYB5R1	2.79424e-15	-0.0997015	0.357	0.466	5.82962e-11	P3.Epcell	CYB5R1
STC2	2.83148e-15	-0.073257	0.192	0.286	5.90731e-11	P3.Epcell	STC2
WDR77	2.9951e-15	-0.0723204	0.292	0.402	6.24867e-11	P3.Epcell	WDR77
G6PC3	3.2256e-15	-0.051265	0.264	0.37	6.72957e-11	P3.Epcell	G6PC3
SEC14L1	3.25735e-15	-0.0751962	0.438	0.558	6.79581e-11	P3.Epcell	SEC14L1
DCBLD2	3.51686e-15	-0.0835493	0.236	0.333	7.33722e-11	P3.Epcell	DCBLD2
BPTF	3.56286e-15	-0.0723239	0.426	0.548	7.43319e-11	P3.Epcell	BPTF
SREK1IP1	3.76212e-15	-0.0743014	0.403	0.522	7.84892e-11	P3.Epcell	SREK1IP1
HDAC7	4.08048e-15	-0.0638485	0.243	0.345	8.5131e-11	P3.Epcell	HDAC7
YBX1	4.08185e-15	0.168452	0.964	0.956	8.51597e-11	P3.Epcell	YBX1
NUP62	4.38899e-15	-0.0477036	0.188	0.279	9.15675e-11	P3.Epcell	NUP62
SLC25A36	4.49431e-15	-0.101504	0.452	0.568	9.37648e-11	P3.Epcell	SLC25A36
HEXIM1	4.53088e-15	-0.077768	0.359	0.471	9.45277e-11	P3.Epcell	HEXIM1
PYCR1	4.57819e-15	-0.0538411	0.164	0.254	9.55147e-11	P3.Epcell	PYCR1
CCDC130	4.61088e-15	-0.0492679	0.201	0.295	9.61968e-11	P3.Epcell	CCDC130
AKNA	4.67223e-15	-0.0997736	0.224	0.315	9.74767e-11	P3.Epcell	AKNA
ARRDC3	4.68761e-15	0.085669	0.55	0.486	9.77977e-11	P3.Epcell	ARRDC3
TMEM170A	5.08044e-15	-0.0780367	0.325	0.434	1.05993e-10	P3.Epcell	TMEM170A
CBX1	5.19492e-15	-0.0587901	0.275	0.382	1.08382e-10	P3.Epcell	CBX1
FBXO32	5.35974e-15	0.119921	0.254	0.175	1.1182e-10	P3.Epcell	FBXO32
TRIM31	5.47959e-15	0.148282	0.451	0.371	1.14321e-10	P3.Epcell	TRIM31
DIMT1	5.63723e-15	-0.0622072	0.285	0.392	1.17609e-10	P3.Epcell	DIMT1
TWSG1	5.70928e-15	-0.0675975	0.176	0.263	1.19113e-10	P3.Epcell	TWSG1
ZNF24	6.13832e-15	-0.0689797	0.316	0.422	1.28064e-10	P3.Epcell	ZNF24
PRSS22	6.24467e-15	0.211569	0.492	0.439	1.30283e-10	P3.Epcell	PRSS22
MTHFD2L	6.32429e-15	-0.0868801	0.384	0.496	1.31944e-10	P3.Epcell	MTHFD2L
ITGB4	6.38433e-15	-0.107611	0.324	0.427	1.33196e-10	P3.Epcell	ITGB4
WDR78	6.43272e-15	-0.133026	0.278	0.37	1.34206e-10	P3.Epcell	WDR78
LIMK2	7.16072e-15	-0.0599883	0.23	0.325	1.49394e-10	P3.Epcell	LIMK2
PIAS3	7.25683e-15	-0.0720327	0.254	0.353	1.51399e-10	P3.Epcell	PIAS3
C1orf106	7.7181e-15	0.112088	0.255	0.179	1.61023e-10	P3.Epcell	C1orf106
PHF14	8.18509e-15	-0.0767197	0.433	0.55	1.70766e-10	P3.Epcell	PHF14
EIF4G3	8.52204e-15	-0.0723258	0.303	0.41	1.77795e-10	P3.Epcell	EIF4G3
C10orf11	8.6567e-15	-0.0705024	0.183	0.269	1.80605e-10	P3.Epcell	C10orf11
SGCB	8.93192e-15	-0.0483809	0.251	0.354	1.86347e-10	P3.Epcell	SGCB
NCOR1	9.10618e-15	-0.0778512	0.445	0.564	1.89982e-10	P3.Epcell	NCOR1
ADAM17	1.00063e-14	0.207958	0.455	0.398	2.08762e-10	P3.Epcell	ADAM17
SNRPA	1.10809e-14	-0.0604873	0.246	0.347	2.31181e-10	P3.Epcell	SNRPA
MYEF2	1.14742e-14	-0.071207	0.288	0.395	2.39386e-10	P3.Epcell	MYEF2
HIST2H2BE	1.15695e-14	-0.0720266	0.202	0.29	2.41374e-10	P3.Epcell	HIST2H2BE
KLF4	1.17101e-14	0.1588	0.463	0.399	2.44307e-10	P3.Epcell	KLF4
DDAH2	1.22506e-14	-0.0891911	0.477	0.595	2.55585e-10	P3.Epcell	DDAH2
DLGAP1-AS1	1.23137e-14	-0.0516995	0.207	0.299	2.569e-10	P3.Epcell	DLGAP1-AS1
SDCCAG8	1.24885e-14	-0.0679906	0.305	0.414	2.60547e-10	P3.Epcell	SDCCAG8
IER3	1.25046e-14	-0.200845	0.743	0.817	2.60883e-10	P3.Epcell	IER3
CAST	1.27319e-14	0.127091	0.764	0.752	2.65626e-10	P3.Epcell	CAST
NIPBL	1.34747e-14	-0.0597448	0.356	0.476	2.81122e-10	P3.Epcell	NIPBL
SLC6A6	1.35666e-14	-0.0990801	0.311	0.414	2.83039e-10	P3.Epcell	SLC6A6
ATP1B3	1.43157e-14	-0.0984778	0.482	0.598	2.98669e-10	P3.Epcell	ATP1B3
WNT7A	1.44094e-14	0.0745617	0.296	0.212	3.00623e-10	P3.Epcell	WNT7A
RPS24	1.48206e-14	-0.0792383	0.997	0.999	3.09202e-10	P3.Epcell	RPS24
RAP2B	1.51581e-14	0.148622	0.386	0.315	3.16243e-10	P3.Epcell	RAP2B
SCAMP4	1.52157e-14	-0.0933239	0.382	0.494	3.17444e-10	P3.Epcell	SCAMP4
PCSK1N	1.55093e-14	-0.107592	0.198	0.289	3.2357e-10	P3.Epcell	PCSK1N
HILPDA	1.56831e-14	0.186794	0.45	0.382	3.27196e-10	P3.Epcell	HILPDA
RBM17	1.60645e-14	-0.0707582	0.47	0.586	3.35154e-10	P3.Epcell	RBM17
ERLIN2	1.63184e-14	-0.0772845	0.244	0.339	3.40451e-10	P3.Epcell	ERLIN2
SRSF7	1.66551e-14	-0.108387	0.627	0.736	3.47476e-10	P3.Epcell	SRSF7
REV1	1.7755e-14	-0.0675312	0.23	0.324	3.70422e-10	P3.Epcell	REV1
HNRNPH3	1.86539e-14	-0.0799418	0.485	0.609	3.89176e-10	P3.Epcell	HNRNPH3
CFB	1.88613e-14	0.196123	0.275	0.203	3.93504e-10	P3.Epcell	CFB
CARHSP1	1.88667e-14	0.149067	0.605	0.578	3.93617e-10	P3.Epcell	CARHSP1
CHD6	2.21612e-14	-0.0558035	0.256	0.359	4.62348e-10	P3.Epcell	CHD6
CCZ1	2.35726e-14	-0.0596476	0.344	0.457	4.91796e-10	P3.Epcell	CCZ1
PDE4DIP	2.52287e-14	-0.0963006	0.25	0.343	5.26347e-10	P3.Epcell	PDE4DIP
INO80D	2.53255e-14	-0.0550315	0.195	0.281	5.28367e-10	P3.Epcell	INO80D
CDK13	2.53572e-14	-0.0501874	0.22	0.311	5.29027e-10	P3.Epcell	CDK13
PTPLB	2.59042e-14	-0.0676059	0.301	0.405	5.4044e-10	P3.Epcell	PTPLB
FAM213B	2.83884e-14	0.160789	0.335	0.269	5.92267e-10	P3.Epcell	FAM213B
SCP2	2.93549e-14	0.124327	0.839	0.854	6.12431e-10	P3.Epcell	SCP2
LAPTM5	3.04201e-14	-0.0978712	0.267	0.368	6.34654e-10	P3.Epcell	LAPTM5
ZNF33A	3.04856e-14	-0.0882961	0.361	0.467	6.36022e-10	P3.Epcell	ZNF33A
EFNA1	3.08797e-14	0.171969	0.508	0.455	6.44243e-10	P3.Epcell	EFNA1
IER5L	3.28152e-14	-0.108516	0.446	0.553	6.84624e-10	P3.Epcell	IER5L
RBM25	3.35514e-14	-0.0847834	0.567	0.679	6.99984e-10	P3.Epcell	RBM25
NET1	3.36091e-14	0.184051	0.497	0.457	7.01186e-10	P3.Epcell	NET1
ZNF91	3.46957e-14	-0.051345	0.243	0.341	7.23856e-10	P3.Epcell	ZNF91
RSBN1L	3.50139e-14	-0.0677198	0.336	0.446	7.30495e-10	P3.Epcell	RSBN1L
HIGD1A	3.58807e-14	0.154352	0.766	0.76	7.48579e-10	P3.Epcell	HIGD1A
IARS	3.65538e-14	-0.0608196	0.286	0.388	7.62621e-10	P3.Epcell	IARS
CAPN1	3.73156e-14	0.164577	0.552	0.519	7.78515e-10	P3.Epcell	CAPN1
SLC25A26	3.8111e-14	-0.0498277	0.189	0.275	7.9511e-10	P3.Epcell	SLC25A26
ZRANB2	3.9949e-14	-0.069804	0.378	0.491	8.33455e-10	P3.Epcell	ZRANB2
B9D1	4.15934e-14	-0.125985	0.33	0.424	8.67763e-10	P3.Epcell	B9D1
PCNXL4	4.38513e-14	-0.0782805	0.232	0.324	9.1487e-10	P3.Epcell	PCNXL4
GZMB	4.57158e-14	-0.133627	0.265	0.358	9.53769e-10	P3.Epcell	GZMB
MAP2K6	4.80948e-14	-0.0633189	0.398	0.51	1.0034e-09	P3.Epcell	MAP2K6
RPGR	5.04155e-14	-0.0880278	0.307	0.405	1.05182e-09	P3.Epcell	RPGR
POLR2A	5.27173e-14	-0.0586513	0.234	0.329	1.09984e-09	P3.Epcell	POLR2A
CNN3	5.27241e-14	-0.110698	0.597	0.705	1.09998e-09	P3.Epcell	CNN3
LIMCH1	5.27754e-14	-0.0653237	0.211	0.303	1.10105e-09	P3.Epcell	LIMCH1
MBP	5.29303e-14	-0.0916496	0.458	0.571	1.10429e-09	P3.Epcell	MBP
LCN12	5.45849e-14	-0.123174	0.231	0.317	1.1388e-09	P3.Epcell	LCN12
VGLL4	5.56159e-14	-0.0643434	0.396	0.512	1.16031e-09	P3.Epcell	VGLL4
SCD	5.56679e-14	-0.101021	0.244	0.33	1.1614e-09	P3.Epcell	SCD
TRIM25	5.7804e-14	-0.0486115	0.191	0.281	1.20596e-09	P3.Epcell	TRIM25
PRRC2A	5.90994e-14	-0.0610575	0.27	0.371	1.23299e-09	P3.Epcell	PRRC2A
ISYNA1	6.15815e-14	-0.0468454	0.17	0.255	1.28477e-09	P3.Epcell	ISYNA1
PHACTR4	6.40594e-14	-0.0752244	0.358	0.462	1.33647e-09	P3.Epcell	PHACTR4
PYCARD	6.491e-14	0.312375	0.523	0.514	1.35422e-09	P3.Epcell	PYCARD
CEP290	6.49369e-14	-0.0722393	0.259	0.354	1.35478e-09	P3.Epcell	CEP290
NR2F2	6.54687e-14	-0.0521636	0.291	0.397	1.36587e-09	P3.Epcell	NR2F2
C9orf72	6.72748e-14	-0.0715243	0.265	0.363	1.40355e-09	P3.Epcell	C9orf72
HOXB-AS3	7.16481e-14	-0.0514591	0.227	0.323	1.49479e-09	P3.Epcell	HOXB-AS3
CLINT1	7.27036e-14	0.158181	0.599	0.568	1.51682e-09	P3.Epcell	CLINT1
AP2S1	7.37203e-14	0.13855	0.717	0.709	1.53803e-09	P3.Epcell	AP2S1
TRA2B	7.64454e-14	-0.0922253	0.544	0.657	1.59488e-09	P3.Epcell	TRA2B
POC1B	7.72984e-14	-0.0453528	0.273	0.377	1.61268e-09	P3.Epcell	POC1B
SENP6	7.78743e-14	-0.0675365	0.357	0.467	1.62469e-09	P3.Epcell	SENP6
ACTR3	7.90849e-14	0.134173	0.722	0.726	1.64995e-09	P3.Epcell	ACTR3
DUSP11	8.08529e-14	-0.073543	0.243	0.335	1.68683e-09	P3.Epcell	DUSP11
RBPJ	8.09949e-14	-0.0658218	0.433	0.55	1.6898e-09	P3.Epcell	RBPJ
ATXN1	8.10139e-14	-0.0622103	0.259	0.358	1.69019e-09	P3.Epcell	ATXN1
PTAR1	8.35238e-14	-0.0416675	0.189	0.278	1.74256e-09	P3.Epcell	PTAR1
RND3	8.70551e-14	0.118583	0.609	0.56	1.81623e-09	P3.Epcell	RND3
EWSR1	8.72788e-14	-0.0867574	0.531	0.649	1.8209e-09	P3.Epcell	EWSR1
SRSF2	8.77785e-14	-0.0945943	0.635	0.745	1.83132e-09	P3.Epcell	SRSF2
RP11-168E14.1	9.67284e-14	-0.102952	0.203	0.29	2.01804e-09	P3.Epcell	RP11-168E14.1
GALNT7	9.83144e-14	-0.0589872	0.37	0.481	2.05113e-09	P3.Epcell	GALNT7
MED29	1.09781e-13	-0.0512305	0.282	0.389	2.29037e-09	P3.Epcell	MED29
ORMDL1	1.12714e-13	-0.0754748	0.423	0.537	2.35155e-09	P3.Epcell	ORMDL1
SGPL1	1.16197e-13	-0.0667956	0.311	0.414	2.42421e-09	P3.Epcell	SGPL1
KHSRP	1.17924e-13	-0.0641666	0.252	0.347	2.46025e-09	P3.Epcell	KHSRP
SREK1	1.21908e-13	-0.0856254	0.461	0.578	2.54337e-09	P3.Epcell	SREK1
RICTOR	1.24407e-13	-0.0574473	0.216	0.306	2.5955e-09	P3.Epcell	RICTOR
KIF22	1.25978e-13	-0.0450268	0.186	0.273	2.62828e-09	P3.Epcell	KIF22
SPG7	1.26745e-13	-0.0591435	0.239	0.333	2.64427e-09	P3.Epcell	SPG7
C6orf48	1.27848e-13	-0.119652	0.638	0.74	2.6673e-09	P3.Epcell	C6orf48
ACIN1	1.28006e-13	-0.0641381	0.367	0.48	2.67059e-09	P3.Epcell	ACIN1
H2AFV	1.32632e-13	-0.0866974	0.553	0.659	2.76711e-09	P3.Epcell	H2AFV
EPSTI1	1.34098e-13	0.134583	0.265	0.194	2.79768e-09	P3.Epcell	EPSTI1
ST3GAL6	1.35327e-13	-0.104121	0.241	0.331	2.82333e-09	P3.Epcell	ST3GAL6
KLC1	1.43236e-13	-0.0493356	0.202	0.292	2.98834e-09	P3.Epcell	KLC1
PPP1R14C	1.45616e-13	0.138188	0.351	0.282	3.03799e-09	P3.Epcell	PPP1R14C
MTRNR2L12	1.52078e-13	0.102458	0.325	0.481	3.17281e-09	P3.Epcell	MTRNR2L12
BAZ2B	1.54195e-13	-0.0506733	0.369	0.483	3.21697e-09	P3.Epcell	BAZ2B
NPTN	1.60367e-13	-0.0853125	0.451	0.569	3.34574e-09	P3.Epcell	NPTN
RHOG	1.61956e-13	-0.0465666	0.226	0.317	3.3789e-09	P3.Epcell	RHOG
FSTL1	1.644e-13	-0.0857374	0.308	0.408	3.42988e-09	P3.Epcell	FSTL1
GOT2	1.66816e-13	-0.0561257	0.282	0.381	3.48028e-09	P3.Epcell	GOT2
WDR60	1.70179e-13	-0.111266	0.436	0.539	3.55044e-09	P3.Epcell	WDR60
NEMF	1.70645e-13	-0.0493013	0.401	0.515	3.56017e-09	P3.Epcell	NEMF
DNAAF1	1.83692e-13	-0.280542	0.331	0.405	3.83236e-09	P3.Epcell	DNAAF1
HIST2H2AA3	1.85266e-13	-0.0433309	0.192	0.28	3.86521e-09	P3.Epcell	HIST2H2AA3
ANKRD26	1.92757e-13	-0.0499252	0.181	0.265	4.02148e-09	P3.Epcell	ANKRD26
NUDT14	1.96476e-13	-0.0812909	0.453	0.568	4.09908e-09	P3.Epcell	NUDT14
WDR82	2.00508e-13	-0.0613555	0.331	0.435	4.18321e-09	P3.Epcell	WDR82
MLTK	2.05989e-13	-0.032817	0.211	0.304	4.29754e-09	P3.Epcell	MLTK
RHOU	2.11064e-13	-0.068511	0.318	0.425	4.40342e-09	P3.Epcell	RHOU
BDP1	2.13431e-13	-0.0628695	0.296	0.396	4.4528e-09	P3.Epcell	BDP1
NPC2	2.17656e-13	0.134372	0.903	0.92	4.54096e-09	P3.Epcell	NPC2
FRYL	2.33951e-13	-0.0593741	0.288	0.386	4.88092e-09	P3.Epcell	FRYL
SUV420H1	2.50042e-13	-0.0565733	0.282	0.382	5.21663e-09	P3.Epcell	SUV420H1
APOL1	2.50293e-13	0.239077	0.581	0.554	5.22187e-09	P3.Epcell	APOL1
ZNF609	2.51523e-13	-0.0689608	0.19	0.271	5.24752e-09	P3.Epcell	ZNF609
EP300	2.52839e-13	-0.0515973	0.265	0.363	5.27498e-09	P3.Epcell	EP300
CFI	2.55549e-13	-0.176418	0.505	0.592	5.33152e-09	P3.Epcell	CFI
SUPT20H	2.5827e-13	-0.0599623	0.31	0.414	5.38828e-09	P3.Epcell	SUPT20H
NCK1	2.60202e-13	0.152612	0.484	0.437	5.42859e-09	P3.Epcell	NCK1
ZNF664	2.66203e-13	-0.0879532	0.428	0.537	5.55379e-09	P3.Epcell	ZNF664
FGFR2	2.79507e-13	-0.0611954	0.222	0.311	5.83135e-09	P3.Epcell	FGFR2
SPG11	2.79552e-13	-0.0643843	0.28	0.38	5.8323e-09	P3.Epcell	SPG11
TCERG1	2.90865e-13	-0.0440139	0.244	0.339	6.06831e-09	P3.Epcell	TCERG1
RAD21	2.93481e-13	-0.0681162	0.408	0.52	6.1229e-09	P3.Epcell	RAD21
UBE2S	2.95468e-13	-0.0683417	0.206	0.291	6.16435e-09	P3.Epcell	UBE2S
STRBP	3.00699e-13	-0.0787819	0.425	0.536	6.27348e-09	P3.Epcell	STRBP
APP	3.06045e-13	-0.0842259	0.675	0.782	6.38502e-09	P3.Epcell	APP
DCAF5	3.23726e-13	-0.0530031	0.205	0.293	6.7539e-09	P3.Epcell	DCAF5
PNPT1	3.25821e-13	-0.04459	0.207	0.295	6.7976e-09	P3.Epcell	PNPT1
CEP95	3.34229e-13	-0.0506789	0.196	0.284	6.97302e-09	P3.Epcell	CEP95
ECI2	3.3937e-13	0.00900193	0.33	0.452	7.08027e-09	P3.Epcell	ECI2
SMC1A	3.54494e-13	-0.0657517	0.337	0.443	7.39582e-09	P3.Epcell	SMC1A
CCDC88C	3.58557e-13	-0.0922632	0.286	0.378	7.48058e-09	P3.Epcell	CCDC88C
C15orf65	3.725e-13	-0.100353	0.27	0.36	7.77146e-09	P3.Epcell	C15orf65
PPIG	3.77816e-13	-0.0829987	0.531	0.648	7.88238e-09	P3.Epcell	PPIG
FNDC3A	4.07963e-13	-0.0501492	0.316	0.42	8.51134e-09	P3.Epcell	FNDC3A
HNRNPDL	4.14346e-13	-0.0796498	0.815	0.881	8.64451e-09	P3.Epcell	HNRNPDL
HADHA	4.55193e-13	-0.0663763	0.453	0.571	9.49668e-09	P3.Epcell	HADHA
FLNB	4.72474e-13	-0.0899459	0.346	0.443	9.85723e-09	P3.Epcell	FLNB
PLXNB1	4.95132e-13	-0.0876259	0.355	0.455	1.03299e-08	P3.Epcell	PLXNB1
PRPF38B	4.95819e-13	-0.058314	0.405	0.521	1.03443e-08	P3.Epcell	PRPF38B
TNRC6A	5.17119e-13	-0.047297	0.257	0.352	1.07887e-08	P3.Epcell	TNRC6A
CA8	5.59533e-13	0.137248	0.278	0.213	1.16735e-08	P3.Epcell	CA8
SMG1	5.66641e-13	-0.053334	0.352	0.46	1.18218e-08	P3.Epcell	SMG1
ARID3A	5.67453e-13	-0.0660543	0.175	0.255	1.18388e-08	P3.Epcell	ARID3A
CTDNEP1	5.78179e-13	-0.0627656	0.315	0.418	1.20625e-08	P3.Epcell	CTDNEP1
MAT2A	5.83723e-13	-0.0586061	0.296	0.402	1.21782e-08	P3.Epcell	MAT2A
DNAJB12	6.03126e-13	-0.0407787	0.227	0.321	1.2583e-08	P3.Epcell	DNAJB12
TEX9	6.04426e-13	-0.0822667	0.24	0.328	1.26101e-08	P3.Epcell	TEX9
SECISBP2	6.30897e-13	-0.0464289	0.302	0.407	1.31624e-08	P3.Epcell	SECISBP2
TPST2	6.44844e-13	-0.0542502	0.191	0.273	1.34534e-08	P3.Epcell	TPST2
TMEM167A	6.55592e-13	0.135817	0.669	0.668	1.36776e-08	P3.Epcell	TMEM167A
U2AF1	6.56819e-13	-0.0863361	0.687	0.79	1.37032e-08	P3.Epcell	U2AF1
SLC44A1	6.94203e-13	-0.104567	0.477	0.582	1.44831e-08	P3.Epcell	SLC44A1
NME4	7.45856e-13	-0.0661596	0.37	0.471	1.55608e-08	P3.Epcell	NME4
MTX1	7.5599e-13	-0.0532299	0.338	0.444	1.57722e-08	P3.Epcell	MTX1
PSMB8	7.76959e-13	0.142878	0.691	0.699	1.62097e-08	P3.Epcell	PSMB8
BUB3	7.78804e-13	-0.0724842	0.367	0.481	1.62482e-08	P3.Epcell	BUB3
C1orf168	7.79691e-13	-0.0596955	0.198	0.28	1.62667e-08	P3.Epcell	C1orf168
MACF1	7.94897e-13	-0.071623	0.441	0.561	1.65839e-08	P3.Epcell	MACF1
ANAPC7	8.23138e-13	-0.0342978	0.212	0.304	1.71731e-08	P3.Epcell	ANAPC7
EXOC7	8.24196e-13	-0.0564949	0.327	0.426	1.71952e-08	P3.Epcell	EXOC7
NXT1	8.33594e-13	-0.0441738	0.277	0.375	1.73913e-08	P3.Epcell	NXT1
TNNC1	8.49586e-13	-0.02843	0.3	0.414	1.77249e-08	P3.Epcell	TNNC1
ATP6AP2	8.65805e-13	-0.106332	0.582	0.7	1.80633e-08	P3.Epcell	ATP6AP2
GANAB	8.7902e-13	-0.0539329	0.347	0.453	1.8339e-08	P3.Epcell	GANAB
ARPC5L	9.25264e-13	0.138595	0.629	0.612	1.93038e-08	P3.Epcell	ARPC5L
TRIM13	9.30992e-13	-0.0476538	0.235	0.329	1.94233e-08	P3.Epcell	TRIM13
AK9	9.37783e-13	-0.0860683	0.21	0.293	1.9565e-08	P3.Epcell	AK9
BZW1	9.41724e-13	0.141776	0.645	0.63	1.96472e-08	P3.Epcell	BZW1
TSPAN14	1.004e-12	-0.0938801	0.376	0.476	2.09464e-08	P3.Epcell	TSPAN14
RIOK3	1.00439e-12	0.147076	0.493	0.455	2.09546e-08	P3.Epcell	RIOK3
ABHD3	1.01395e-12	-0.0564245	0.196	0.277	2.11541e-08	P3.Epcell	ABHD3
HCFC1R1	1.03901e-12	-0.0617788	0.347	0.45	2.16768e-08	P3.Epcell	HCFC1R1
TMEM68	1.09156e-12	-0.0659939	0.25	0.34	2.27733e-08	P3.Epcell	TMEM68
DHRS1	1.11481e-12	-0.0393714	0.17	0.251	2.32583e-08	P3.Epcell	DHRS1
LINC00240	1.12848e-12	-0.0854883	0.176	0.253	2.35435e-08	P3.Epcell	LINC00240
DUSP10	1.13357e-12	0.151052	0.34	0.273	2.36497e-08	P3.Epcell	DUSP10
IFT74	1.17663e-12	-0.0538704	0.223	0.313	2.4548e-08	P3.Epcell	IFT74
C5orf42	1.20431e-12	-0.0596517	0.232	0.324	2.51256e-08	P3.Epcell	C5orf42
EPS8	1.21427e-12	0.153118	0.56	0.528	2.53332e-08	P3.Epcell	EPS8
FNBP1	1.22795e-12	-0.0654901	0.336	0.435	2.56186e-08	P3.Epcell	FNBP1
HLA-DQA1	1.22827e-12	0.161852	0.499	0.44	2.56254e-08	P3.Epcell	HLA-DQA1
BAZ1B	1.26073e-12	-0.0556814	0.287	0.387	2.63027e-08	P3.Epcell	BAZ1B
ZNF428	1.34828e-12	-0.0801791	0.642	0.743	2.81292e-08	P3.Epcell	ZNF428
C20orf96	1.37267e-12	-0.0721095	0.233	0.322	2.86381e-08	P3.Epcell	C20orf96
NFU1	1.4004e-12	-0.0658408	0.394	0.505	2.92166e-08	P3.Epcell	NFU1
CREM	1.45838e-12	-0.114276	0.353	0.447	3.04262e-08	P3.Epcell	CREM
CCDC14	1.4698e-12	-0.0671646	0.316	0.41	3.06645e-08	P3.Epcell	CCDC14
PRSS12	1.49075e-12	-0.0588339	0.197	0.277	3.11015e-08	P3.Epcell	PRSS12
NHLRC3	1.49126e-12	-0.0443987	0.212	0.297	3.11122e-08	P3.Epcell	NHLRC3
MFSD12	1.49612e-12	-0.0646673	0.231	0.315	3.12136e-08	P3.Epcell	MFSD12
RAB4B	1.50728e-12	-0.0489449	0.196	0.279	3.14465e-08	P3.Epcell	RAB4B
TMEM242	1.50904e-12	-0.0375708	0.215	0.305	3.14831e-08	P3.Epcell	TMEM242
HINT1	1.55711e-12	0.101014	0.965	0.955	3.2486e-08	P3.Epcell	HINT1
RILPL2	1.6084e-12	-0.0841143	0.338	0.432	3.3556e-08	P3.Epcell	RILPL2
IP6K2	1.62973e-12	-0.0568281	0.418	0.532	3.40011e-08	P3.Epcell	IP6K2
RAB25	1.75733e-12	0.161874	0.602	0.596	3.66631e-08	P3.Epcell	RAB25
RAC1	1.76962e-12	0.107493	0.949	0.955	3.69195e-08	P3.Epcell	RAC1
SNAPC1	1.86333e-12	-0.0653054	0.279	0.375	3.88747e-08	P3.Epcell	SNAPC1
H2AFZ	1.86662e-12	-0.111275	0.831	0.896	3.89432e-08	P3.Epcell	H2AFZ
GZMA	1.90492e-12	-0.101079	0.226	0.313	3.97424e-08	P3.Epcell	GZMA
SERBP1	1.95099e-12	0.106666	0.871	0.879	4.07035e-08	P3.Epcell	SERBP1
COA1	1.9664e-12	-0.0623946	0.331	0.435	4.1025e-08	P3.Epcell	COA1
ATP6V1G1	2.06108e-12	0.10419	0.929	0.929	4.30002e-08	P3.Epcell	ATP6V1G1
HMGN2	2.20281e-12	-0.0832796	0.878	0.936	4.59572e-08	P3.Epcell	HMGN2
IDNK	2.24044e-12	-0.0688804	0.183	0.259	4.67423e-08	P3.Epcell	IDNK
MAGED2	2.38113e-12	-0.0715931	0.407	0.522	4.96775e-08	P3.Epcell	MAGED2
MZF1	2.44667e-12	-0.0539061	0.192	0.274	5.10449e-08	P3.Epcell	MZF1
CUTA	2.49699e-12	-0.0995409	0.769	0.843	5.20946e-08	P3.Epcell	CUTA
SMC6	2.59527e-12	-0.0471115	0.18	0.261	5.41451e-08	P3.Epcell	SMC6
MID1IP1	2.64413e-12	-0.0530194	0.282	0.381	5.51646e-08	P3.Epcell	MID1IP1
MBNL1	2.65899e-12	-0.063264	0.345	0.448	5.54745e-08	P3.Epcell	MBNL1
XPR1	2.72581e-12	-0.0556042	0.299	0.396	5.68686e-08	P3.Epcell	XPR1
GLG1	2.72737e-12	-0.0464365	0.321	0.427	5.69012e-08	P3.Epcell	GLG1
SPATA6L	2.76431e-12	-0.0783837	0.184	0.261	5.76717e-08	P3.Epcell	SPATA6L
DEFB1	2.77215e-12	0.211586	0.738	0.675	5.78354e-08	P3.Epcell	DEFB1
PHC3	2.82246e-12	-0.0531367	0.176	0.254	5.88851e-08	P3.Epcell	PHC3
C6orf118	2.88444e-12	-0.143263	0.231	0.306	6.0178e-08	P3.Epcell	C6orf118
PLCB1	3.04198e-12	-0.0777332	0.251	0.334	6.34649e-08	P3.Epcell	PLCB1
CYR61	3.07532e-12	-0.276776	0.481	0.572	6.41604e-08	P3.Epcell	CYR61
LARS	3.12435e-12	-0.0396467	0.454	0.575	6.51833e-08	P3.Epcell	LARS
SLC39A3	3.22905e-12	-0.0472851	0.243	0.332	6.73676e-08	P3.Epcell	SLC39A3
ARL2	3.23116e-12	-0.0741788	0.414	0.522	6.74116e-08	P3.Epcell	ARL2
CSTF3	3.4608e-12	-0.0568794	0.313	0.41	7.22026e-08	P3.Epcell	CSTF3
RHOD	3.48488e-12	0.144484	0.279	0.217	7.27051e-08	P3.Epcell	RHOD
C17orf72	3.52011e-12	-0.124041	0.214	0.29	7.344e-08	P3.Epcell	C17orf72
ZNF638	3.65679e-12	-0.0520105	0.403	0.514	7.62916e-08	P3.Epcell	ZNF638
PLLP	3.77028e-12	-0.0505299	0.198	0.28	7.86593e-08	P3.Epcell	PLLP
SLC38A2	3.85221e-12	-0.0991523	0.503	0.61	8.03686e-08	P3.Epcell	SLC38A2
NARG2	3.97249e-12	-0.0434059	0.249	0.342	8.2878e-08	P3.Epcell	NARG2
SMG7	4.16852e-12	-0.0507933	0.243	0.333	8.69679e-08	P3.Epcell	SMG7
GPR108	4.39406e-12	-0.0579085	0.252	0.341	9.16732e-08	P3.Epcell	GPR108
AFF1	4.43581e-12	-0.0645703	0.272	0.366	9.25443e-08	P3.Epcell	AFF1
SCOC	4.48198e-12	0.114836	0.708	0.719	9.35076e-08	P3.Epcell	SCOC
SPATS2	4.58975e-12	-0.0509071	0.277	0.371	9.57559e-08	P3.Epcell	SPATS2
DNAH5	4.76588e-12	-0.148181	0.249	0.322	9.94307e-08	P3.Epcell	DNAH5
CLTB	4.8095e-12	0.128105	0.605	0.578	1.00341e-07	P3.Epcell	CLTB
PRMT2	4.96846e-12	-0.0764851	0.419	0.522	1.03657e-07	P3.Epcell	PRMT2
DDB1	5.04697e-12	-0.0462671	0.352	0.46	1.05295e-07	P3.Epcell	DDB1
EXOSC8	5.08714e-12	-0.0508296	0.208	0.293	1.06133e-07	P3.Epcell	EXOSC8
2020-03-06	5.14538e-12	-0.0946314	0.498	0.603	1.07348e-07	P3.Epcell	2020-03-06
FZD6	5.26668e-12	-0.0538829	0.359	0.465	1.09879e-07	P3.Epcell	FZD6
RBBP6	5.30256e-12	-0.0660312	0.329	0.423	1.10627e-07	P3.Epcell	RBBP6
FAM60A	5.41413e-12	-0.10922	0.607	0.711	1.12955e-07	P3.Epcell	FAM60A
ARL4D	5.43365e-12	-0.0793434	0.309	0.409	1.13362e-07	P3.Epcell	ARL4D
TARBP1	5.6071e-12	-0.0501115	0.184	0.261	1.16981e-07	P3.Epcell	TARBP1
LONP2	5.7337e-12	-0.0555017	0.324	0.423	1.19622e-07	P3.Epcell	LONP2
COX5A	5.74539e-12	0.117425	0.874	0.859	1.19866e-07	P3.Epcell	COX5A
HOMER2	5.96865e-12	-0.0642857	0.453	0.568	1.24524e-07	P3.Epcell	HOMER2
ELF2	6.15212e-12	-0.0441274	0.269	0.363	1.28352e-07	P3.Epcell	ELF2
GGA1	6.33609e-12	-0.0492621	0.264	0.355	1.3219e-07	P3.Epcell	GGA1
DNAJC4	6.49322e-12	-0.0460048	0.328	0.432	1.35468e-07	P3.Epcell	DNAJC4
MRPL23	6.63545e-12	-0.0913975	0.678	0.773	1.38435e-07	P3.Epcell	MRPL23
ZBTB20	6.84076e-12	-0.0507886	0.197	0.277	1.42719e-07	P3.Epcell	ZBTB20
DNAJA4	6.92235e-12	-0.138481	0.359	0.449	1.44421e-07	P3.Epcell	DNAJA4
IFITM2	6.94486e-12	-0.132096	0.768	0.835	1.44891e-07	P3.Epcell	IFITM2
REST	6.96942e-12	-0.0480757	0.359	0.465	1.45403e-07	P3.Epcell	REST
GNG5	6.99944e-12	0.106055	0.904	0.907	1.46029e-07	P3.Epcell	GNG5
SH3BP5	7.14757e-12	-0.0488471	0.211	0.293	1.4912e-07	P3.Epcell	SH3BP5
SHROOM3	7.2129e-12	-0.0663772	0.376	0.479	1.50483e-07	P3.Epcell	SHROOM3
PRPF4B	7.2379e-12	-0.0592322	0.494	0.616	1.51004e-07	P3.Epcell	PRPF4B
ALDH7A1	7.49038e-12	-0.0298405	0.196	0.282	1.56272e-07	P3.Epcell	ALDH7A1
NSD1	7.53879e-12	-0.0468382	0.25	0.338	1.57282e-07	P3.Epcell	NSD1
PIP4K2A	7.75367e-12	-0.0450841	0.18	0.259	1.61765e-07	P3.Epcell	PIP4K2A
ZNRF1	7.99436e-12	-0.0430798	0.176	0.252	1.66786e-07	P3.Epcell	ZNRF1
CHTOP	8.23782e-12	-0.0612137	0.393	0.5	1.71866e-07	P3.Epcell	CHTOP
ZFYVE19	8.3946e-12	-0.0460618	0.207	0.29	1.75136e-07	P3.Epcell	ZFYVE19
MUC5B	8.78331e-12	0.107006	0.589	0.481	1.83246e-07	P3.Epcell	MUC5B
BSDC1	9.2754e-12	-0.0532453	0.222	0.306	1.93513e-07	P3.Epcell	BSDC1
SORBS2	9.32114e-12	-0.0744574	0.405	0.508	1.94467e-07	P3.Epcell	SORBS2
TMEM223	9.8683e-12	-0.0367636	0.224	0.31	2.05882e-07	P3.Epcell	TMEM223
CCNT2	9.87736e-12	-0.0387354	0.205	0.29	2.06071e-07	P3.Epcell	CCNT2
CDK5RAP3	1.02695e-11	-0.0613936	0.363	0.465	2.14253e-07	P3.Epcell	CDK5RAP3
RPL36A	1.07441e-11	-0.129114	0.942	0.97	2.24154e-07	P3.Epcell	RPL36A
SREBF1	1.10648e-11	-0.0556411	0.288	0.381	2.30846e-07	P3.Epcell	SREBF1
UBTF	1.11866e-11	-0.0454036	0.258	0.351	2.33387e-07	P3.Epcell	UBTF
CLCN3	1.23748e-11	-0.0649507	0.35	0.445	2.58175e-07	P3.Epcell	CLCN3
MED13L	1.26134e-11	-0.0514148	0.221	0.304	2.63153e-07	P3.Epcell	MED13L
RERE	1.27548e-11	-0.0632068	0.36	0.455	2.66103e-07	P3.Epcell	RERE
ALG2	1.28318e-11	-0.0496522	0.283	0.376	2.67709e-07	P3.Epcell	ALG2
MYH9	1.31718e-11	-0.0708563	0.459	0.567	2.74802e-07	P3.Epcell	MYH9
RING1	1.31856e-11	-0.0453603	0.246	0.335	2.75092e-07	P3.Epcell	RING1
CCDC57	1.47147e-11	-0.0453495	0.244	0.331	3.06992e-07	P3.Epcell	CCDC57
TRPS1	1.47161e-11	-0.0558745	0.307	0.403	3.07023e-07	P3.Epcell	TRPS1
PRPF8	1.48315e-11	-0.0520701	0.285	0.379	3.09429e-07	P3.Epcell	PRPF8
RPL37	1.52189e-11	-0.112071	0.997	0.995	3.17513e-07	P3.Epcell	RPL37
SEPHS2	1.53861e-11	0.154876	0.517	0.489	3.21e-07	P3.Epcell	SEPHS2
MTX2	1.5642e-11	-0.0814227	0.476	0.583	3.26339e-07	P3.Epcell	MTX2
FAM53C	1.59428e-11	-0.0423801	0.196	0.276	3.32614e-07	P3.Epcell	FAM53C
CEBPG	1.61804e-11	-0.0602951	0.284	0.371	3.37571e-07	P3.Epcell	CEBPG
GNB1	1.62916e-11	-0.0809578	0.439	0.54	3.39891e-07	P3.Epcell	GNB1
JUN	1.64526e-11	-0.166284	0.826	0.874	3.43251e-07	P3.Epcell	JUN
ENPP4	1.77938e-11	-0.071295	0.329	0.42	3.71232e-07	P3.Epcell	ENPP4
JOSD2	1.78455e-11	-0.0261348	0.203	0.289	3.72311e-07	P3.Epcell	JOSD2
SCAMP2	1.78661e-11	-0.038443	0.3	0.399	3.72741e-07	P3.Epcell	SCAMP2
C8orf59	1.85961e-11	-0.0635307	0.576	0.694	3.8797e-07	P3.Epcell	C8orf59
ABHD14B	1.90058e-11	-0.0496765	0.272	0.359	3.96518e-07	P3.Epcell	ABHD14B
PTPMT1	1.92613e-11	-0.0628415	0.425	0.529	4.01849e-07	P3.Epcell	PTPMT1
LBH	1.93178e-11	-0.144449	0.323	0.403	4.03028e-07	P3.Epcell	LBH
TBC1D9	1.97754e-11	-0.0392654	0.229	0.315	4.12575e-07	P3.Epcell	TBC1D9
NFIA	2.00007e-11	-0.124842	0.461	0.55	4.17275e-07	P3.Epcell	NFIA
RPL13	2.00335e-11	-0.114322	1	1	4.1796e-07	P3.Epcell	RPL13
CXCL3	2.00888e-11	0.0858627	0.545	0.455	4.19113e-07	P3.Epcell	CXCL3
SDC2	2.01166e-11	-0.0459333	0.202	0.287	4.19692e-07	P3.Epcell	SDC2
KLHL9	2.03226e-11	-0.0423319	0.175	0.251	4.2399e-07	P3.Epcell	KLHL9
FAM133B	2.03276e-11	-0.0784486	0.53	0.638	4.24095e-07	P3.Epcell	FAM133B
PTP4A2	2.0751e-11	0.152492	0.695	0.716	4.32929e-07	P3.Epcell	PTP4A2
NOXA1	2.13644e-11	-0.0434278	0.205	0.287	4.45726e-07	P3.Epcell	NOXA1
MAN1A2	2.19529e-11	-0.0510586	0.314	0.408	4.58004e-07	P3.Epcell	MAN1A2
MSN	2.22324e-11	-0.0525518	0.393	0.503	4.63835e-07	P3.Epcell	MSN
MBD4	2.25137e-11	-0.0277176	0.293	0.392	4.69704e-07	P3.Epcell	MBD4
ATXN2L	2.30507e-11	-0.0378954	0.215	0.3	4.80907e-07	P3.Epcell	ATXN2L
ENOSF1	2.31687e-11	-0.0514719	0.336	0.436	4.83368e-07	P3.Epcell	ENOSF1
PIK3R1	2.33565e-11	-0.0153244	0.298	0.403	4.87286e-07	P3.Epcell	PIK3R1
DUSP2	2.42522e-11	-0.210572	0.239	0.318	5.05974e-07	P3.Epcell	DUSP2
RSBN1	2.43077e-11	-0.0383092	0.19	0.269	5.07132e-07	P3.Epcell	RSBN1
ITGB5	2.43709e-11	-0.0520026	0.183	0.256	5.0845e-07	P3.Epcell	ITGB5
FAF2	2.53304e-11	-0.0432845	0.191	0.269	5.28468e-07	P3.Epcell	FAF2
PAN3	2.60379e-11	-0.0491363	0.253	0.342	5.43228e-07	P3.Epcell	PAN3
NDUFS5	2.66207e-11	-0.0615679	0.946	0.961	5.55388e-07	P3.Epcell	NDUFS5
NENF	2.70817e-11	0.140887	0.666	0.663	5.65006e-07	P3.Epcell	NENF
SMC3	2.7869e-11	-0.0550594	0.336	0.437	5.81431e-07	P3.Epcell	SMC3
CRTAP	2.84412e-11	-0.0375795	0.218	0.301	5.93368e-07	P3.Epcell	CRTAP
HAGH	2.89908e-11	-0.0570385	0.372	0.473	6.04834e-07	P3.Epcell	HAGH
UBXN7	2.91405e-11	-0.0429541	0.192	0.27	6.07959e-07	P3.Epcell	UBXN7
PMM1	2.988e-11	-0.052657	0.248	0.336	6.23386e-07	P3.Epcell	PMM1
NPDC1	3.04517e-11	-0.0885921	0.451	0.543	6.35314e-07	P3.Epcell	NPDC1
DHRSX	3.05735e-11	-0.0422984	0.23	0.314	6.37855e-07	P3.Epcell	DHRSX
TSHZ2	3.06727e-11	-0.083196	0.287	0.368	6.39924e-07	P3.Epcell	TSHZ2
CDC42EP1	3.06801e-11	0.108463	0.269	0.205	6.40079e-07	P3.Epcell	CDC42EP1
SSB	3.10172e-11	-0.0902448	0.712	0.8	6.47111e-07	P3.Epcell	SSB
TNC	3.15639e-11	-0.0688581	0.197	0.276	6.58517e-07	P3.Epcell	TNC
DNAH6	3.21971e-11	-0.0848934	0.215	0.292	6.71728e-07	P3.Epcell	DNAH6
HES1	3.24006e-11	0.121213	0.649	0.612	6.75975e-07	P3.Epcell	HES1
CCDC40	3.31987e-11	-0.0778862	0.183	0.254	6.92625e-07	P3.Epcell	CCDC40
PPP1R14B	3.46042e-11	-0.106198	0.44	0.529	7.21947e-07	P3.Epcell	PPP1R14B
DRAM2	3.4679e-11	-0.089351	0.44	0.543	7.23507e-07	P3.Epcell	DRAM2
ESYT1	3.48861e-11	-0.046451	0.193	0.271	7.27828e-07	P3.Epcell	ESYT1
DIDO1	3.54903e-11	-0.0461176	0.2	0.278	7.40433e-07	P3.Epcell	DIDO1
WIPF2	3.56256e-11	-0.0469461	0.25	0.334	7.43256e-07	P3.Epcell	WIPF2
FNIP2	3.61724e-11	0.11352	0.26	0.196	7.54666e-07	P3.Epcell	FNIP2
PAPSS1	3.67179e-11	0.00629155	0.475	0.605	7.66045e-07	P3.Epcell	PAPSS1
TTC19	3.96912e-11	-0.0433324	0.306	0.403	8.28077e-07	P3.Epcell	TTC19
ZMIZ2	3.97493e-11	-0.0378653	0.225	0.307	8.29289e-07	P3.Epcell	ZMIZ2
CNOT10	4.06222e-11	-0.0452077	0.184	0.26	8.47502e-07	P3.Epcell	CNOT10
USP34	4.07357e-11	-0.0548962	0.403	0.506	8.4987e-07	P3.Epcell	USP34
MED30	4.16166e-11	-0.0575627	0.24	0.323	8.68247e-07	P3.Epcell	MED30
MARS	4.401e-11	-0.0460266	0.2	0.278	9.18182e-07	P3.Epcell	MARS
MED19	4.43026e-11	-0.043328	0.259	0.347	9.24284e-07	P3.Epcell	MED19
MAATS1	4.44499e-11	-0.0940587	0.195	0.266	9.27357e-07	P3.Epcell	MAATS1
CNBP	4.4709e-11	-0.092615	0.651	0.737	9.32765e-07	P3.Epcell	CNBP
TRIP11	4.52658e-11	-0.0433619	0.344	0.446	9.4438e-07	P3.Epcell	TRIP11
ENPP5	4.87188e-11	-0.0603235	0.234	0.315	1.01642e-06	P3.Epcell	ENPP5
CYB561	4.93175e-11	-0.060701	0.381	0.483	1.02891e-06	P3.Epcell	CYB561
MCCC2	4.95759e-11	-0.0656908	0.362	0.457	1.0343e-06	P3.Epcell	MCCC2
SLC44A4	4.96936e-11	0.119679	0.591	0.549	1.03676e-06	P3.Epcell	SLC44A4
CD7	5.00373e-11	-0.0867626	0.241	0.323	1.04393e-06	P3.Epcell	CD7
MYL12A	5.10612e-11	0.0989634	0.97	0.965	1.06529e-06	P3.Epcell	MYL12A
LINC00969	5.10656e-11	-0.0428549	0.305	0.4	1.06538e-06	P3.Epcell	LINC00969
PUM1	5.13072e-11	-0.0625289	0.467	0.578	1.07042e-06	P3.Epcell	PUM1
SF3A2	5.1504e-11	-0.0303302	0.219	0.304	1.07453e-06	P3.Epcell	SF3A2
RPLP2	5.28073e-11	-0.100151	1	0.998	1.10172e-06	P3.Epcell	RPLP2
CSF1	5.29117e-11	-0.155308	0.248	0.326	1.1039e-06	P3.Epcell	CSF1
CST3	5.37573e-11	0.114619	0.945	0.97	1.12154e-06	P3.Epcell	CST3
CGGBP1	5.99744e-11	-0.0470375	0.372	0.47	1.25125e-06	P3.Epcell	CGGBP1
ADPGK	6.05644e-11	-0.0555572	0.264	0.347	1.26355e-06	P3.Epcell	ADPGK
PDCD7	6.12099e-11	-0.0372567	0.209	0.289	1.27702e-06	P3.Epcell	PDCD7
PHKB	6.16896e-11	-0.0423559	0.29	0.384	1.28703e-06	P3.Epcell	PHKB
CPSF6	6.18169e-11	-0.0362482	0.298	0.395	1.28969e-06	P3.Epcell	CPSF6
DNASE2	6.30721e-11	-0.0349589	0.289	0.386	1.31587e-06	P3.Epcell	DNASE2
NCOR2	6.47577e-11	-0.0392637	0.209	0.29	1.35104e-06	P3.Epcell	NCOR2
DDIT3	6.50641e-11	-0.0913681	0.306	0.397	1.35743e-06	P3.Epcell	DDIT3
ZC3H11A	6.68552e-11	-0.0639173	0.41	0.51	1.3948e-06	P3.Epcell	ZC3H11A
ZCCHC11	6.75773e-11	-0.0489098	0.301	0.392	1.40986e-06	P3.Epcell	ZCCHC11
RPRD2	6.76257e-11	-0.0358377	0.211	0.293	1.41088e-06	P3.Epcell	RPRD2
USP10	6.89195e-11	-0.0359148	0.255	0.345	1.43787e-06	P3.Epcell	USP10
CEBPB	6.98518e-11	0.0639804	0.852	0.857	1.45732e-06	P3.Epcell	CEBPB
ASXL1	7.14507e-11	-0.0381903	0.219	0.3	1.49068e-06	P3.Epcell	ASXL1
KMT2A	7.17706e-11	-0.0416748	0.275	0.365	1.49735e-06	P3.Epcell	KMT2A
GTF3C5	7.22554e-11	-0.0476957	0.195	0.27	1.50746e-06	P3.Epcell	GTF3C5
WNK1	7.34589e-11	-0.0478309	0.348	0.447	1.53257e-06	P3.Epcell	WNK1
C6orf1	7.756e-11	-0.047158	0.222	0.302	1.61814e-06	P3.Epcell	C6orf1
SPATA18	7.79358e-11	-0.125891	0.347	0.427	1.62597e-06	P3.Epcell	SPATA18
TMED3	7.9172e-11	0.131403	0.564	0.536	1.65176e-06	P3.Epcell	TMED3
YWHAE	7.94432e-11	0.118231	0.947	0.951	1.65742e-06	P3.Epcell	YWHAE
IFT81	8.01811e-11	-0.0609064	0.274	0.36	1.67282e-06	P3.Epcell	IFT81
SMARCC2	8.02189e-11	-0.0398078	0.197	0.276	1.67361e-06	P3.Epcell	SMARCC2
KANSL1	8.06565e-11	-0.0295598	0.182	0.259	1.68274e-06	P3.Epcell	KANSL1
ANKRD36	8.32022e-11	-0.0464466	0.301	0.393	1.73585e-06	P3.Epcell	ANKRD36
POLK	8.46359e-11	-0.0405771	0.286	0.381	1.76576e-06	P3.Epcell	POLK
STIM2	8.54101e-11	-0.0465425	0.207	0.286	1.78191e-06	P3.Epcell	STIM2
MGEA5	8.54752e-11	-0.0576304	0.407	0.51	1.78327e-06	P3.Epcell	MGEA5
CITED2	8.6283e-11	0.177376	0.501	0.46	1.80012e-06	P3.Epcell	CITED2
SLC25A37	8.64343e-11	0.15373	0.402	0.352	1.80328e-06	P3.Epcell	SLC25A37
NSA2	8.71566e-11	-0.0691304	0.644	0.734	1.81835e-06	P3.Epcell	NSA2
RFXANK	8.80583e-11	-0.0653291	0.453	0.553	1.83716e-06	P3.Epcell	RFXANK
PURA	8.92001e-11	-0.0384284	0.236	0.318	1.86098e-06	P3.Epcell	PURA
SHPRH	8.96007e-11	-0.040578	0.189	0.265	1.86934e-06	P3.Epcell	SHPRH
RABGAP1	9.17083e-11	-0.0484697	0.23	0.312	1.91331e-06	P3.Epcell	RABGAP1
ILKAP	9.34319e-11	-0.0326579	0.19	0.269	1.94927e-06	P3.Epcell	ILKAP
DYNC2H1	9.39813e-11	-0.119707	0.264	0.34	1.96073e-06	P3.Epcell	DYNC2H1
AC007405.6	9.44176e-11	-0.0712077	0.224	0.3	1.96983e-06	P3.Epcell	AC007405.6
PSMB9	9.64762e-11	0.151672	0.533	0.502	2.01278e-06	P3.Epcell	PSMB9
SUPT16H	9.74496e-11	-0.0412359	0.369	0.476	2.03309e-06	P3.Epcell	SUPT16H
CKAP4	9.77743e-11	-0.0683142	0.365	0.458	2.03986e-06	P3.Epcell	CKAP4
SQLE	1.02477e-10	-0.0445884	0.349	0.457	2.13797e-06	P3.Epcell	SQLE
BSG	1.0281e-10	-0.0827017	0.783	0.854	2.14493e-06	P3.Epcell	BSG
C9orf142	1.05448e-10	-0.0709589	0.473	0.572	2.19996e-06	P3.Epcell	C9orf142
SCPEP1	1.06171e-10	-0.161905	0.271	0.344	2.21505e-06	P3.Epcell	SCPEP1
ZSCAN16-AS1	1.06441e-10	-0.0389419	0.229	0.312	2.22068e-06	P3.Epcell	ZSCAN16-AS1
RYBP	1.0655e-10	-0.0558519	0.346	0.442	2.22294e-06	P3.Epcell	RYBP
C7orf73	1.0987e-10	0.124571	0.691	0.698	2.29222e-06	P3.Epcell	C7orf73
UFM1	1.13548e-10	0.120012	0.686	0.681	2.36895e-06	P3.Epcell	UFM1
UBE2D3	1.16415e-10	0.0943362	0.854	0.873	2.42877e-06	P3.Epcell	UBE2D3
BRWD1	1.17752e-10	-0.0473103	0.337	0.435	2.45666e-06	P3.Epcell	BRWD1
USE1	1.19506e-10	-0.0391998	0.279	0.368	2.49324e-06	P3.Epcell	USE1
LPGAT1	1.19993e-10	-0.0563878	0.338	0.43	2.50341e-06	P3.Epcell	LPGAT1
KCNK1	1.22622e-10	0.14683	0.483	0.457	2.55827e-06	P3.Epcell	KCNK1
DNAH9	1.23043e-10	-0.118932	0.221	0.291	2.56705e-06	P3.Epcell	DNAH9
ZBTB1	1.2393e-10	-0.0357343	0.239	0.324	2.58555e-06	P3.Epcell	ZBTB1
EMP1	1.24129e-10	0.0407738	0.376	0.308	2.5897e-06	P3.Epcell	EMP1
RP6-109B7.3	1.27018e-10	-0.0729632	0.36	0.449	2.64998e-06	P3.Epcell	RP6-109B7.3
BNIP2	1.28284e-10	-0.0449014	0.256	0.339	2.67639e-06	P3.Epcell	BNIP2
CFLAR	1.30836e-10	-0.07866	0.513	0.618	2.72964e-06	P3.Epcell	CFLAR
LPP	1.31889e-10	-0.0678318	0.449	0.554	2.7516e-06	P3.Epcell	LPP
TM2D3	1.32255e-10	-0.055892	0.329	0.42	2.75924e-06	P3.Epcell	TM2D3
WHSC1L1	1.32945e-10	-0.0714997	0.473	0.574	2.77363e-06	P3.Epcell	WHSC1L1
MIEN1	1.33406e-10	-0.0688134	0.574	0.675	2.78325e-06	P3.Epcell	MIEN1
XIAP	1.3564e-10	-0.0607904	0.378	0.475	2.82986e-06	P3.Epcell	XIAP
OTUD7B	1.38108e-10	-0.0357549	0.187	0.263	2.88135e-06	P3.Epcell	OTUD7B
SNHG7	1.45014e-10	-0.0656676	0.376	0.468	3.02542e-06	P3.Epcell	SNHG7
TRIM27	1.56888e-10	-0.058723	0.299	0.385	3.27316e-06	P3.Epcell	TRIM27
GNB5	1.58819e-10	-0.045373	0.196	0.273	3.31344e-06	P3.Epcell	GNB5
RHOA	1.59576e-10	0.0994035	0.84	0.858	3.32923e-06	P3.Epcell	RHOA
IGF2R	1.64418e-10	-0.0426544	0.237	0.319	3.43025e-06	P3.Epcell	IGF2R
BCL7C	1.6535e-10	-0.0359055	0.255	0.34	3.44969e-06	P3.Epcell	BCL7C
RNF181	1.68201e-10	0.114542	0.736	0.726	3.50917e-06	P3.Epcell	RNF181
GPATCH2L	1.73039e-10	-0.0422488	0.22	0.301	3.61011e-06	P3.Epcell	GPATCH2L
LYPLA2	1.81087e-10	0.158631	0.495	0.468	3.77802e-06	P3.Epcell	LYPLA2
ARL14EP	1.83024e-10	-0.0257017	0.201	0.284	3.81844e-06	P3.Epcell	ARL14EP
DNAJB13	1.85781e-10	-0.154249	0.374	0.441	3.87595e-06	P3.Epcell	DNAJB13
TTLL5	1.8579e-10	-0.0461824	0.191	0.264	3.87613e-06	P3.Epcell	TTLL5
RAB11B	1.86015e-10	-0.0673753	0.494	0.596	3.88084e-06	P3.Epcell	RAB11B
SMIM11	1.86697e-10	-0.0226813	0.251	0.343	3.89506e-06	P3.Epcell	SMIM11
UCP2	1.88794e-10	0.137463	0.728	0.717	3.9388e-06	P3.Epcell	UCP2
NUMA1	1.9103e-10	-0.037918	0.3	0.392	3.98547e-06	P3.Epcell	NUMA1
CPNE3	1.93653e-10	-0.0413804	0.432	0.537	4.04019e-06	P3.Epcell	CPNE3
ARHGAP26	1.97008e-10	-0.0649651	0.331	0.421	4.11017e-06	P3.Epcell	ARHGAP26
C21orf58	1.99252e-10	-0.150136	0.271	0.342	4.15699e-06	P3.Epcell	C21orf58
ZNF131	2.00486e-10	-0.0319707	0.209	0.289	4.18274e-06	P3.Epcell	ZNF131
CRYZL1	2.06431e-10	-0.0413954	0.239	0.32	4.30676e-06	P3.Epcell	CRYZL1
SFSWAP	2.07348e-10	-0.027122	0.196	0.273	4.32589e-06	P3.Epcell	SFSWAP
HKDC1	2.08294e-10	-0.0639531	0.228	0.304	4.34563e-06	P3.Epcell	HKDC1
GNB2L1	2.177e-10	-0.102086	0.98	0.984	4.54188e-06	P3.Epcell	GNB2L1
MTCH1	2.21387e-10	0.132825	0.569	0.553	4.6188e-06	P3.Epcell	MTCH1
MNS1	2.24582e-10	-0.186895	0.306	0.37	4.68546e-06	P3.Epcell	MNS1
ARPC2	2.27007e-10	0.0982833	0.852	0.852	4.73606e-06	P3.Epcell	ARPC2
FOXO3	2.27233e-10	-0.0530825	0.345	0.442	4.74076e-06	P3.Epcell	FOXO3
SOCS3	2.30513e-10	0.104539	0.574	0.531	4.80919e-06	P3.Epcell	SOCS3
DHRS7B	2.38592e-10	-0.0500767	0.294	0.382	4.97774e-06	P3.Epcell	DHRS7B
FAM221A	2.44763e-10	-0.0268611	0.24	0.323	5.10649e-06	P3.Epcell	FAM221A
BRD7	2.45586e-10	-0.0469396	0.383	0.483	5.12366e-06	P3.Epcell	BRD7
HSPB8	2.48793e-10	-0.0733107	0.204	0.28	5.19058e-06	P3.Epcell	HSPB8
NF1	2.50916e-10	-0.0538639	0.329	0.421	5.23486e-06	P3.Epcell	NF1
TMEM87A	2.55342e-10	-0.0564038	0.388	0.488	5.32719e-06	P3.Epcell	TMEM87A
SPATA33	2.60964e-10	-0.103492	0.297	0.376	5.44449e-06	P3.Epcell	SPATA33
DUSP4	2.62158e-10	0.115806	0.382	0.326	5.4694e-06	P3.Epcell	DUSP4
CMAS	2.66881e-10	0.1256	0.402	0.354	5.56795e-06	P3.Epcell	CMAS
MYL12B	2.68821e-10	0.0953784	0.965	0.963	5.60842e-06	P3.Epcell	MYL12B
RNF115	2.71149e-10	-0.051344	0.312	0.403	5.65698e-06	P3.Epcell	RNF115
PPP2CB	2.75477e-10	-0.063349	0.42	0.519	5.74728e-06	P3.Epcell	PPP2CB
DNAH11	2.76246e-10	-0.0918558	0.283	0.359	5.76331e-06	P3.Epcell	DNAH11
CDK12	2.76461e-10	-0.0587358	0.314	0.399	5.76782e-06	P3.Epcell	CDK12
EXPH5	2.80973e-10	-0.0410866	0.257	0.343	5.86194e-06	P3.Epcell	EXPH5
CD74	2.81669e-10	-0.174055	0.949	0.992	5.87645e-06	P3.Epcell	CD74
FAM111A	2.82545e-10	-0.0434737	0.204	0.28	5.89474e-06	P3.Epcell	FAM111A
NOP56	2.83442e-10	-0.0529435	0.349	0.442	5.91346e-06	P3.Epcell	NOP56
DDIT4	2.85554e-10	0.0431799	0.766	0.76	5.95752e-06	P3.Epcell	DDIT4
NUDT9	2.87644e-10	-0.0278261	0.211	0.293	6.00111e-06	P3.Epcell	NUDT9
LARP4B	2.95319e-10	-0.0507197	0.282	0.365	6.16123e-06	P3.Epcell	LARP4B
GTF2I	2.9581e-10	-0.104714	0.744	0.824	6.17148e-06	P3.Epcell	GTF2I
MARK3	2.95871e-10	-0.0563717	0.373	0.466	6.17277e-06	P3.Epcell	MARK3
RNF144B	3.0153e-10	0.130645	0.384	0.329	6.29083e-06	P3.Epcell	RNF144B
MLXIP	3.04238e-10	-0.0674483	0.284	0.367	6.34731e-06	P3.Epcell	MLXIP
HSPB11	3.19026e-10	-0.094189	0.557	0.661	6.65583e-06	P3.Epcell	HSPB11
KIAA1211L	3.19471e-10	-0.070673	0.218	0.29	6.66512e-06	P3.Epcell	KIAA1211L
LAMA5	3.21264e-10	-0.0399134	0.276	0.36	6.70253e-06	P3.Epcell	LAMA5
SYNE2	3.24277e-10	-0.0297387	0.591	0.699	6.76538e-06	P3.Epcell	SYNE2
NDRG2	3.27368e-10	-0.0582165	0.296	0.389	6.82987e-06	P3.Epcell	NDRG2
STX16	3.46487e-10	-0.046504	0.239	0.32	7.22876e-06	P3.Epcell	STX16
TMEM18	3.5742e-10	-0.0326641	0.296	0.388	7.45686e-06	P3.Epcell	TMEM18
CCDC91	3.58363e-10	-0.0453693	0.257	0.339	7.47654e-06	P3.Epcell	CCDC91
SRI	3.64492e-10	0.0904588	0.84	0.841	7.6044e-06	P3.Epcell	SRI
CAPZA1	3.65183e-10	0.134735	0.693	0.69	7.61882e-06	P3.Epcell	CAPZA1
LINC00948	3.75864e-10	-0.158684	0.2	0.264	7.84165e-06	P3.Epcell	LINC00948
KIAA2026	3.80031e-10	-0.041625	0.203	0.277	7.92859e-06	P3.Epcell	KIAA2026
ZFAS1	3.88268e-10	-0.091943	0.81	0.86	8.10044e-06	P3.Epcell	ZFAS1
REL	3.88579e-10	-0.0510149	0.342	0.435	8.10692e-06	P3.Epcell	REL
EIF4EBP1	3.89438e-10	-0.107126	0.376	0.46	8.12485e-06	P3.Epcell	EIF4EBP1
ABCA1	3.96647e-10	-0.03701	0.186	0.259	8.27525e-06	P3.Epcell	ABCA1
CKAP5	4.00007e-10	-0.0339469	0.183	0.256	8.34535e-06	P3.Epcell	CKAP5
ATP2B4	4.034e-10	-0.0611494	0.343	0.435	8.41613e-06	P3.Epcell	ATP2B4
INTU	4.09272e-10	-0.0602522	0.244	0.325	8.53864e-06	P3.Epcell	INTU
ZNF652	4.14009e-10	-0.0343947	0.231	0.311	8.63746e-06	P3.Epcell	ZNF652
NUMB	4.14898e-10	-0.0531149	0.394	0.497	8.65601e-06	P3.Epcell	NUMB
DCAF8	4.24435e-10	-0.0373123	0.249	0.333	8.855e-06	P3.Epcell	DCAF8
PGAM1	4.24483e-10	0.151911	0.643	0.642	8.85598e-06	P3.Epcell	PGAM1
CASC3	4.29722e-10	-0.0484026	0.227	0.305	8.96529e-06	P3.Epcell	CASC3
GALNT11	4.35478e-10	-0.0414036	0.243	0.324	9.08539e-06	P3.Epcell	GALNT11
CTDSP2	4.41573e-10	-0.0391277	0.215	0.291	9.21254e-06	P3.Epcell	CTDSP2
C19orf48	4.41651e-10	-0.0549787	0.211	0.284	9.21416e-06	P3.Epcell	C19orf48
SRSF3	4.44483e-10	-0.0713223	0.783	0.865	9.27324e-06	P3.Epcell	SRSF3
FAM174B	4.60484e-10	-0.0330968	0.21	0.286	9.60707e-06	P3.Epcell	FAM174B
NFE2L1	4.74166e-10	-0.0559379	0.399	0.497	9.89253e-06	P3.Epcell	NFE2L1
ARHGAP18	4.78825e-10	-0.0830286	0.333	0.414	9.98974e-06	P3.Epcell	ARHGAP18
C11orf1	4.83274e-10	-0.0376525	0.25	0.332	1.00826e-05	P3.Epcell	C11orf1
PPP1R9A	4.94927e-10	-0.0492247	0.249	0.327	1.03257e-05	P3.Epcell	PPP1R9A
TXNRD1	5.12657e-10	0.156286	0.444	0.407	1.06956e-05	P3.Epcell	TXNRD1
KRIT1	5.13046e-10	-0.0329668	0.253	0.338	1.07037e-05	P3.Epcell	KRIT1
SRSF11	5.20952e-10	-0.0648819	0.65	0.753	1.08686e-05	P3.Epcell	SRSF11
BAIAP2	5.23687e-10	0.123809	0.44	0.389	1.09257e-05	P3.Epcell	BAIAP2
PFN1	5.34549e-10	0.0794544	0.989	0.989	1.11523e-05	P3.Epcell	PFN1
ABHD17A	5.4567e-10	-0.03574	0.208	0.283	1.13843e-05	P3.Epcell	ABHD17A
LRRC46	5.58725e-10	-0.166731	0.291	0.356	1.16567e-05	P3.Epcell	LRRC46
SLC33A1	5.66738e-10	-0.0418483	0.217	0.291	1.18238e-05	P3.Epcell	SLC33A1
IRF7	5.81633e-10	0.100692	0.255	0.196	1.21346e-05	P3.Epcell	IRF7
XRRA1	6.29376e-10	-0.0472818	0.187	0.256	1.31307e-05	P3.Epcell	XRRA1
NOSIP	6.3029e-10	-0.0479691	0.446	0.546	1.31497e-05	P3.Epcell	NOSIP
FRA10AC1	6.35992e-10	-0.0513943	0.238	0.315	1.32687e-05	P3.Epcell	FRA10AC1
HS6ST1	6.37567e-10	-0.0505286	0.205	0.276	1.33016e-05	P3.Epcell	HS6ST1
UBA1	6.41016e-10	-0.0698492	0.459	0.557	1.33735e-05	P3.Epcell	UBA1
CS	6.64928e-10	-0.0374221	0.194	0.265	1.38724e-05	P3.Epcell	CS
SLC16A3	6.6666e-10	0.203759	0.559	0.553	1.39085e-05	P3.Epcell	SLC16A3
RP11-220I1.1	6.7268e-10	-0.0553422	0.35	0.442	1.40341e-05	P3.Epcell	RP11-220I1.1
MRPL24	6.7342e-10	-0.0490896	0.381	0.484	1.40496e-05	P3.Epcell	MRPL24
C1orf123	6.79931e-10	-0.0433169	0.263	0.348	1.41854e-05	P3.Epcell	C1orf123
TPP1	6.80653e-10	-0.048699	0.235	0.313	1.42005e-05	P3.Epcell	TPP1
QKI	6.81199e-10	-0.0285314	0.273	0.364	1.42118e-05	P3.Epcell	QKI
DDX46	7.13742e-10	-0.0640008	0.501	0.602	1.48908e-05	P3.Epcell	DDX46
CCDC74B	7.1892e-10	-0.0359293	0.192	0.265	1.49988e-05	P3.Epcell	CCDC74B
ITGA3	7.22007e-10	0.156954	0.378	0.333	1.50632e-05	P3.Epcell	ITGA3
PIGT	7.52371e-10	-0.0483808	0.39	0.485	1.56967e-05	P3.Epcell	PIGT
UBE2G2	7.6004e-10	-0.0474306	0.267	0.348	1.58567e-05	P3.Epcell	UBE2G2
RCOR1	7.68185e-10	-0.041987	0.232	0.307	1.60267e-05	P3.Epcell	RCOR1
MUC16	7.78199e-10	0.223675	0.652	0.621	1.62356e-05	P3.Epcell	MUC16
MXD4	7.85789e-10	-0.0356943	0.211	0.288	1.63939e-05	P3.Epcell	MXD4
TOB1	8.23037e-10	0.0857434	0.702	0.682	1.7171e-05	P3.Epcell	TOB1
S100A1	8.27239e-10	0.156917	0.306	0.243	1.72587e-05	P3.Epcell	S100A1
PRPF19	8.28018e-10	-0.0313077	0.247	0.327	1.72749e-05	P3.Epcell	PRPF19
DNAJC16	8.29385e-10	-0.0477171	0.212	0.284	1.73035e-05	P3.Epcell	DNAJC16
TM7SF2	8.48945e-10	-0.0246668	0.18	0.252	1.77115e-05	P3.Epcell	TM7SF2
TNFRSF21	8.53336e-10	0.121663	0.331	0.28	1.78032e-05	P3.Epcell	TNFRSF21
TSPAN15	8.70407e-10	-0.0427563	0.211	0.283	1.81593e-05	P3.Epcell	TSPAN15
OCIAD1	8.96963e-10	-0.0855728	0.677	0.764	1.87133e-05	P3.Epcell	OCIAD1
TEX264	9.12463e-10	-0.0450631	0.436	0.546	1.90367e-05	P3.Epcell	TEX264
CTSC	9.27348e-10	0.203666	0.538	0.523	1.93473e-05	P3.Epcell	CTSC
OPTN	9.45471e-10	0.126943	0.449	0.404	1.97254e-05	P3.Epcell	OPTN
FBL	9.61802e-10	-0.0668113	0.446	0.537	2.00661e-05	P3.Epcell	FBL
TXNIP	9.89721e-10	-0.0928307	0.557	0.65	2.06486e-05	P3.Epcell	TXNIP
NSFL1C	1.01539e-09	-0.0421249	0.348	0.44	2.11841e-05	P3.Epcell	NSFL1C
THOC6	1.01808e-09	-0.0393588	0.255	0.336	2.12402e-05	P3.Epcell	THOC6
RBM39	1.04191e-09	-0.0618229	0.781	0.866	2.17373e-05	P3.Epcell	RBM39
EMP2	1.05994e-09	0.177592	0.495	0.478	2.21136e-05	P3.Epcell	EMP2
RBM10	1.06772e-09	-0.0359909	0.204	0.28	2.22759e-05	P3.Epcell	RBM10
PTRH1	1.08058e-09	-0.0674259	0.284	0.368	2.25442e-05	P3.Epcell	PTRH1
ANAPC5	1.10008e-09	-0.0332885	0.465	0.575	2.29511e-05	P3.Epcell	ANAPC5
CBLB	1.10788e-09	-0.0447088	0.19	0.259	2.31137e-05	P3.Epcell	CBLB
RP11-792A8.4	1.109e-09	-0.0335658	0.23	0.308	2.31371e-05	P3.Epcell	RP11-792A8.4
RDX	1.12368e-09	-0.0670341	0.598	0.691	2.34433e-05	P3.Epcell	RDX
NUDT4	1.17924e-09	0.151687	0.451	0.424	2.46024e-05	P3.Epcell	NUDT4
URI1	1.19334e-09	-0.0402064	0.342	0.431	2.48967e-05	P3.Epcell	URI1
FRMD8	1.19429e-09	0.121967	0.254	0.201	2.49164e-05	P3.Epcell	FRMD8
C1orf27	1.1949e-09	-0.0281744	0.195	0.269	2.49291e-05	P3.Epcell	C1orf27
VKORC1	1.20332e-09	-0.0352169	0.391	0.496	2.5105e-05	P3.Epcell	VKORC1
MIA3	1.23267e-09	-0.0218001	0.27	0.36	2.57172e-05	P3.Epcell	MIA3
FOSL2	1.23482e-09	0.14784	0.49	0.458	2.5762e-05	P3.Epcell	FOSL2
CYB5R3	1.30847e-09	-0.0786354	0.498	0.601	2.72987e-05	P3.Epcell	CYB5R3
DDX42	1.33555e-09	-0.0453156	0.329	0.416	2.78635e-05	P3.Epcell	DDX42
TMEM232	1.33972e-09	-0.0899033	0.207	0.274	2.79506e-05	P3.Epcell	TMEM232
RAB6A	1.34088e-09	-0.0627401	0.492	0.588	2.79747e-05	P3.Epcell	RAB6A
ZFAND5	1.36475e-09	-0.0806208	0.675	0.768	2.84727e-05	P3.Epcell	ZFAND5
SPPL3	1.3817e-09	-0.0376782	0.231	0.309	2.88264e-05	P3.Epcell	SPPL3
AKAP17A	1.448e-09	-0.030665	0.208	0.283	3.02097e-05	P3.Epcell	AKAP17A
SLC3A2	1.48568e-09	-0.0798601	0.393	0.486	3.09958e-05	P3.Epcell	SLC3A2
S100A4	1.54169e-09	-0.00759234	0.643	0.745	3.21642e-05	P3.Epcell	S100A4
LSM7	1.57241e-09	-0.0717607	0.764	0.845	3.28052e-05	P3.Epcell	LSM7
SETD2	1.593e-09	-0.0339091	0.304	0.391	3.32349e-05	P3.Epcell	SETD2
TFPT	1.60141e-09	0.160731	0.494	0.472	3.34101e-05	P3.Epcell	TFPT
RPL29	1.68474e-09	-0.11501	0.996	0.995	3.51487e-05	P3.Epcell	RPL29
RBL2	1.69916e-09	-0.0367533	0.267	0.352	3.54496e-05	P3.Epcell	RBL2
AGRN	1.72499e-09	-0.0686827	0.428	0.522	3.59885e-05	P3.Epcell	AGRN
CRIP2	1.7261e-09	-0.0820789	0.785	0.851	3.60116e-05	P3.Epcell	CRIP2
SLC38A10	1.7415e-09	-0.0302305	0.241	0.321	3.6333e-05	P3.Epcell	SLC38A10
MOSPD1	1.74937e-09	-0.115216	0.23	0.295	3.64971e-05	P3.Epcell	MOSPD1
SMIM5	1.75554e-09	0.112756	0.297	0.239	3.66259e-05	P3.Epcell	SMIM5
LMTK3	1.76303e-09	0.12609	0.309	0.255	3.67821e-05	P3.Epcell	LMTK3
EMP3	1.76432e-09	-0.0402565	0.217	0.294	3.68091e-05	P3.Epcell	EMP3
APIP	1.77469e-09	-0.0491337	0.395	0.494	3.70254e-05	P3.Epcell	APIP
NR1H2	1.79047e-09	-0.0454881	0.324	0.411	3.73545e-05	P3.Epcell	NR1H2
SLC25A38	1.79687e-09	-0.031863	0.215	0.291	3.74882e-05	P3.Epcell	SLC25A38
LSR	1.81878e-09	-0.0575524	0.474	0.568	3.79453e-05	P3.Epcell	LSR
TCEAL1	1.82086e-09	-0.0381739	0.219	0.295	3.79887e-05	P3.Epcell	TCEAL1
MTF2	1.82192e-09	-0.0240326	0.248	0.329	3.80107e-05	P3.Epcell	MTF2
LRRC61	1.86529e-09	-0.0286164	0.214	0.289	3.89155e-05	P3.Epcell	LRRC61
IPO5	1.90105e-09	-0.051281	0.309	0.392	3.96616e-05	P3.Epcell	IPO5
CDK11B	1.91076e-09	-0.032273	0.181	0.253	3.98643e-05	P3.Epcell	CDK11B
ASH1L	1.9171e-09	-0.0503594	0.383	0.476	3.99965e-05	P3.Epcell	ASH1L
RTN3	1.94251e-09	-0.0539972	0.551	0.665	4.05267e-05	P3.Epcell	RTN3
PRCP	1.94254e-09	-0.0455561	0.281	0.362	4.05272e-05	P3.Epcell	PRCP
ATF3	1.95161e-09	-0.20054	0.722	0.784	4.07164e-05	P3.Epcell	ATF3
YTHDF2	2.01943e-09	-0.0591597	0.475	0.571	4.21313e-05	P3.Epcell	YTHDF2
EIF2AK4	2.02291e-09	-0.0310117	0.199	0.27	4.2204e-05	P3.Epcell	EIF2AK4
CYSTM1	2.08726e-09	0.13485	0.879	0.877	4.35466e-05	P3.Epcell	CYSTM1
CCDC12	2.11023e-09	-0.0366705	0.434	0.542	4.40257e-05	P3.Epcell	CCDC12
ATP13A1	2.13574e-09	-0.0328497	0.197	0.268	4.4558e-05	P3.Epcell	ATP13A1
ECH1	2.13891e-09	-0.0883875	0.582	0.681	4.4624e-05	P3.Epcell	ECH1
ZNF83	2.17616e-09	-0.0334902	0.283	0.369	4.54011e-05	P3.Epcell	ZNF83
CEP41	2.18028e-09	-0.0566565	0.209	0.28	4.54872e-05	P3.Epcell	CEP41
ATRX	2.22352e-09	-0.0518603	0.518	0.618	4.63892e-05	P3.Epcell	ATRX
TMEM165	2.23318e-09	0.118509	0.732	0.747	4.65909e-05	P3.Epcell	TMEM165
IARS2	2.26498e-09	-0.0423405	0.357	0.45	4.72543e-05	P3.Epcell	IARS2
CCNH	2.2825e-09	-0.0531058	0.27	0.351	4.76198e-05	P3.Epcell	CCNH
SPAG8	2.30861e-09	-0.144716	0.241	0.304	4.81646e-05	P3.Epcell	SPAG8
CDC42EP3	2.31178e-09	-0.0345161	0.23	0.308	4.82306e-05	P3.Epcell	CDC42EP3
PLD3	2.34617e-09	-0.046098	0.403	0.499	4.89481e-05	P3.Epcell	PLD3
HNRNPA1	2.35148e-09	-0.0790816	0.946	0.974	4.9059e-05	P3.Epcell	HNRNPA1
ATP6AP1	2.36221e-09	-0.0510626	0.416	0.518	4.92828e-05	P3.Epcell	ATP6AP1
FGFR1OP	2.38942e-09	-0.0427656	0.277	0.36	4.98506e-05	P3.Epcell	FGFR1OP
UFL1	2.44983e-09	-0.0430673	0.346	0.442	5.11107e-05	P3.Epcell	UFL1
SLC37A3	2.45274e-09	-0.0483919	0.247	0.321	5.11715e-05	P3.Epcell	SLC37A3
SNX5	2.47531e-09	-0.0446908	0.399	0.492	5.16425e-05	P3.Epcell	SNX5
RC3H2	2.49365e-09	-0.0412697	0.241	0.315	5.20251e-05	P3.Epcell	RC3H2
CREBBP	2.54836e-09	-0.03398	0.211	0.283	5.31665e-05	P3.Epcell	CREBBP
NELFE	2.55399e-09	-0.050188	0.441	0.545	5.32839e-05	P3.Epcell	NELFE
NFAT5	2.5574e-09	-0.058545	0.388	0.484	5.33551e-05	P3.Epcell	NFAT5
HNRNPUL1	2.65093e-09	-0.0441611	0.349	0.438	5.53064e-05	P3.Epcell	HNRNPUL1
BPGM	2.72933e-09	0.0948527	0.258	0.203	5.6942e-05	P3.Epcell	BPGM
HP1BP3	2.73071e-09	-0.0367133	0.468	0.58	5.69708e-05	P3.Epcell	HP1BP3
UQCC2	2.76698e-09	-0.0664262	0.571	0.675	5.77276e-05	P3.Epcell	UQCC2
FLNA	2.77458e-09	-0.0178394	0.255	0.342	5.78862e-05	P3.Epcell	FLNA
RAP1B	2.77466e-09	0.126132	0.67	0.684	5.78876e-05	P3.Epcell	RAP1B
TADA3	2.77696e-09	-0.0417527	0.362	0.453	5.79356e-05	P3.Epcell	TADA3
PSMB2	2.80656e-09	0.114963	0.682	0.672	5.85533e-05	P3.Epcell	PSMB2
PLA2G12A	2.80858e-09	-0.0573272	0.351	0.44	5.85954e-05	P3.Epcell	PLA2G12A
PURB	2.84066e-09	-0.0279061	0.229	0.304	5.92648e-05	P3.Epcell	PURB
PRDX2	2.85972e-09	0.105529	0.835	0.833	5.96624e-05	P3.Epcell	PRDX2
GNPTAB	2.86391e-09	-0.0397511	0.225	0.297	5.97497e-05	P3.Epcell	GNPTAB
ABI2	2.89838e-09	-0.0568069	0.324	0.414	6.0469e-05	P3.Epcell	ABI2
SPR	2.89886e-09	-0.0346475	0.197	0.267	6.04788e-05	P3.Epcell	SPR
TMEM70	2.93126e-09	-0.0739212	0.265	0.341	6.11549e-05	P3.Epcell	TMEM70
NUP54	2.93308e-09	-0.0308495	0.219	0.294	6.11928e-05	P3.Epcell	NUP54
TMED1	2.95643e-09	-0.0534989	0.302	0.388	6.168e-05	P3.Epcell	TMED1
CSRP1	2.96261e-09	-0.0174351	0.231	0.312	6.18089e-05	P3.Epcell	CSRP1
RBMS1	3.06911e-09	-0.0608337	0.416	0.509	6.40308e-05	P3.Epcell	RBMS1
AP3S1	3.08681e-09	0.129632	0.636	0.653	6.44001e-05	P3.Epcell	AP3S1
ANP32B	3.08808e-09	-0.0723814	0.517	0.606	6.44267e-05	P3.Epcell	ANP32B
SHISA5	3.12003e-09	-0.0405232	0.374	0.475	6.50932e-05	P3.Epcell	SHISA5
ADD1	3.13547e-09	-0.0432481	0.294	0.378	6.54152e-05	P3.Epcell	ADD1
C11orf31	3.15042e-09	0.103679	0.819	0.83	6.57272e-05	P3.Epcell	C11orf31
CUL5	3.22237e-09	-0.0297082	0.277	0.36	6.72284e-05	P3.Epcell	CUL5
STRN3	3.24153e-09	0.138607	0.447	0.412	6.76281e-05	P3.Epcell	STRN3
AK2	3.31436e-09	0.127004	0.644	0.644	6.91474e-05	P3.Epcell	AK2
PHF11	3.39459e-09	-0.0352917	0.329	0.422	7.08213e-05	P3.Epcell	PHF11
ATP5L	3.457e-09	0.0640634	0.97	0.976	7.21235e-05	P3.Epcell	ATP5L
VEZT	3.45812e-09	-0.0316492	0.301	0.384	7.21468e-05	P3.Epcell	VEZT
ATF6	3.52696e-09	-0.0297902	0.27	0.352	7.35829e-05	P3.Epcell	ATF6
ANAPC13	3.65288e-09	-0.0440813	0.444	0.543	7.62101e-05	P3.Epcell	ANAPC13
HIST1H2BK	3.68528e-09	0.14184	0.657	0.648	7.68861e-05	P3.Epcell	HIST1H2BK
TMCC1	3.87068e-09	-0.0273888	0.209	0.282	8.0754e-05	P3.Epcell	TMCC1
TROVE2	3.88272e-09	-0.0211295	0.314	0.409	8.10052e-05	P3.Epcell	TROVE2
FNBP1L	3.89379e-09	-0.0423173	0.445	0.552	8.12362e-05	P3.Epcell	FNBP1L
GCNT1	3.92506e-09	-0.0315325	0.227	0.302	8.18885e-05	P3.Epcell	GCNT1
USP1	3.95456e-09	-0.0370072	0.237	0.312	8.2504e-05	P3.Epcell	USP1
CHMP5	3.98453e-09	0.0991405	0.738	0.746	8.31294e-05	P3.Epcell	CHMP5
FAM178A	4.01349e-09	-0.0227182	0.184	0.255	8.37334e-05	P3.Epcell	FAM178A
CLDN4	4.05764e-09	0.0890005	0.802	0.829	8.46545e-05	P3.Epcell	CLDN4
LMNA	4.06091e-09	-0.0182509	0.8	0.792	8.47227e-05	P3.Epcell	LMNA
ARPC4	4.10415e-09	0.132196	0.559	0.536	8.56249e-05	P3.Epcell	ARPC4
RHOT1	4.26051e-09	-0.0344556	0.205	0.275	8.8887e-05	P3.Epcell	RHOT1
RAB21	4.32657e-09	-0.0373686	0.264	0.345	9.02652e-05	P3.Epcell	RAB21
WDR11	4.33408e-09	-0.0370682	0.277	0.359	9.04218e-05	P3.Epcell	WDR11
KDM5A	4.38848e-09	-0.0272474	0.27	0.353	9.1557e-05	P3.Epcell	KDM5A
MAP2K2	4.40614e-09	-0.04526	0.362	0.452	9.19253e-05	P3.Epcell	MAP2K2
MAP3K13	4.47284e-09	0.112609	0.698	0.708	9.33169e-05	P3.Epcell	MAP3K13
QTRT1	4.50363e-09	-0.0479322	0.282	0.359	9.39592e-05	P3.Epcell	QTRT1
EHMT1	4.73525e-09	-0.0399605	0.223	0.297	9.87915e-05	P3.Epcell	EHMT1
LAMB2	4.74234e-09	-0.0470061	0.19	0.258	9.89394e-05	P3.Epcell	LAMB2
HADH	4.80417e-09	-0.0563576	0.382	0.471	0.000100229	P3.Epcell	HADH
GALE	4.81494e-09	0.14001	0.422	0.383	0.000100454	P3.Epcell	GALE
MAGOH	4.82968e-09	-0.0672134	0.521	0.628	0.000100762	P3.Epcell	MAGOH
ZNF800	4.94195e-09	-0.0244776	0.186	0.256	0.000103104	P3.Epcell	ZNF800
PSPC1	5.09002e-09	-0.0327871	0.281	0.366	0.000106193	P3.Epcell	PSPC1
SAFB2	5.1006e-09	-0.0440439	0.291	0.371	0.000106414	P3.Epcell	SAFB2
PBRM1	5.12278e-09	-0.0472632	0.382	0.472	0.000106877	P3.Epcell	PBRM1
WLS	5.24196e-09	-0.0543529	0.243	0.315	0.000109363	P3.Epcell	WLS
CDK2AP2	5.27003e-09	-0.0963953	0.659	0.74	0.000109949	P3.Epcell	CDK2AP2
TMEM231	5.30419e-09	-0.106922	0.269	0.337	0.000110661	P3.Epcell	TMEM231
SMARCD2	5.30885e-09	-0.0351805	0.192	0.257	0.000110759	P3.Epcell	SMARCD2
KIAA1191	5.32672e-09	-0.0303837	0.312	0.401	0.000111131	P3.Epcell	KIAA1191
ZFC3H1	5.39856e-09	-0.0298082	0.217	0.289	0.00011263	P3.Epcell	ZFC3H1
GON4L	5.44942e-09	-0.0223738	0.212	0.286	0.000113691	P3.Epcell	GON4L
CLOCK	5.48798e-09	-0.0448059	0.255	0.333	0.000114496	P3.Epcell	CLOCK
NT5DC1	5.49653e-09	-0.0451508	0.262	0.342	0.000114674	P3.Epcell	NT5DC1
AQP5	5.62032e-09	0.181408	0.3	0.248	0.000117257	P3.Epcell	AQP5
UBE2H	5.64223e-09	-0.0774746	0.58	0.677	0.000117714	P3.Epcell	UBE2H
KRT10	5.70873e-09	0.110805	0.774	0.789	0.000119101	P3.Epcell	KRT10
FAM110C	5.80379e-09	-0.0424482	0.285	0.364	0.000121084	P3.Epcell	FAM110C
OSBPL3	5.8047e-09	-0.0426435	0.229	0.302	0.000121103	P3.Epcell	OSBPL3
SIN3A	5.8513e-09	-0.0381758	0.228	0.302	0.000122076	P3.Epcell	SIN3A
GPATCH2	5.89436e-09	-0.0372896	0.26	0.339	0.000122974	P3.Epcell	GPATCH2
SAR1A	5.90529e-09	0.143557	0.519	0.494	0.000123202	P3.Epcell	SAR1A
TMEM181	6.10726e-09	-0.038141	0.269	0.35	0.000127416	P3.Epcell	TMEM181
PARVA	6.3076e-09	-0.0371641	0.313	0.4	0.000131596	P3.Epcell	PARVA
CCND1	6.35341e-09	-0.18657	0.395	0.456	0.000132551	P3.Epcell	CCND1
CCDC23	6.46064e-09	-0.0417785	0.267	0.345	0.000134788	P3.Epcell	CCDC23
OSGEP	6.58392e-09	-0.0267517	0.197	0.269	0.00013736	P3.Epcell	OSGEP
CCAR1	6.61929e-09	-0.0426664	0.399	0.493	0.000138098	P3.Epcell	CCAR1
PTK7	6.62263e-09	-0.0484282	0.266	0.343	0.000138168	P3.Epcell	PTK7
EPS8L1	6.84255e-09	0.135925	0.519	0.487	0.000142756	P3.Epcell	EPS8L1
TFDP2	6.92793e-09	-0.0524739	0.337	0.422	0.000144537	P3.Epcell	TFDP2
GFM2	6.98525e-09	-0.0508408	0.241	0.314	0.000145733	P3.Epcell	GFM2
MYCBP2	7.05908e-09	-0.0406871	0.274	0.35	0.000147274	P3.Epcell	MYCBP2
SNRPB2	7.06568e-09	-0.0584496	0.631	0.735	0.000147411	P3.Epcell	SNRPB2
CASC1	7.1271e-09	-0.0632913	0.231	0.301	0.000148693	P3.Epcell	CASC1
DNAJC3	7.47983e-09	0.138769	0.602	0.6	0.000156052	P3.Epcell	DNAJC3
SPEN	7.49967e-09	-0.0206506	0.261	0.345	0.000156466	P3.Epcell	SPEN
C22orf39	7.55475e-09	-0.0389595	0.334	0.422	0.000157615	P3.Epcell	C22orf39
MT1X	7.74695e-09	0.00721814	0.336	0.422	0.000161625	P3.Epcell	MT1X
DYNC1H1	7.80879e-09	-0.0335932	0.449	0.558	0.000162915	P3.Epcell	DYNC1H1
KIAA0368	7.92495e-09	-0.0269906	0.194	0.261	0.000165338	P3.Epcell	KIAA0368
KIAA0430	7.93425e-09	-0.0324758	0.189	0.256	0.000165532	P3.Epcell	KIAA0430
PDK4	8.10751e-09	-0.0322342	0.301	0.232	0.000169147	P3.Epcell	PDK4
TMPRSS3	8.29419e-09	-0.0489296	0.259	0.333	0.000173042	P3.Epcell	TMPRSS3
NCOA7	8.35374e-09	0.114162	0.602	0.568	0.000174284	P3.Epcell	NCOA7
KIAA1109	8.46827e-09	-0.023366	0.252	0.331	0.000176674	P3.Epcell	KIAA1109
INSIG1	8.47652e-09	-0.171506	0.23	0.297	0.000176846	P3.Epcell	INSIG1
PTPN18	8.56407e-09	-0.0336005	0.237	0.312	0.000178672	P3.Epcell	PTPN18
TCF12	8.78091e-09	-0.0313975	0.239	0.313	0.000183196	P3.Epcell	TCF12
HGS	9.00741e-09	-0.0375904	0.286	0.366	0.000187921	P3.Epcell	HGS
LLGL2	9.25018e-09	-0.0710013	0.466	0.551	0.000192986	P3.Epcell	LLGL2
ABHD2	9.31453e-09	-0.0562925	0.284	0.362	0.000194329	P3.Epcell	ABHD2
DERL2	9.52746e-09	-0.0303787	0.331	0.425	0.000198771	P3.Epcell	DERL2
FAM214A	9.69751e-09	-0.0364107	0.273	0.351	0.000202319	P3.Epcell	FAM214A
ARHGEF12	1.011e-08	-0.044442	0.399	0.493	0.000210925	P3.Epcell	ARHGEF12
U47924.27	1.04978e-08	-0.0485385	0.257	0.331	0.000219015	P3.Epcell	U47924.27
ZMYM2	1.05805e-08	-0.0548952	0.416	0.504	0.000220741	P3.Epcell	ZMYM2
EFCAB2	1.07592e-08	-0.11232	0.294	0.361	0.000224468	P3.Epcell	EFCAB2
CWC27	1.11042e-08	-0.0357903	0.197	0.265	0.000231667	P3.Epcell	CWC27
NQO1	1.11776e-08	0.138268	0.647	0.607	0.000233197	P3.Epcell	NQO1
NSUN5	1.12003e-08	-0.0311894	0.194	0.263	0.000233672	P3.Epcell	NSUN5
RANBP2	1.13762e-08	-0.0430077	0.411	0.505	0.000237342	P3.Epcell	RANBP2
SUN1	1.14404e-08	-0.0720758	0.52	0.626	0.000238681	P3.Epcell	SUN1
ZDHHC21	1.14821e-08	-0.0290805	0.212	0.283	0.000239551	P3.Epcell	ZDHHC21
CHP1	1.15774e-08	0.128694	0.575	0.554	0.00024154	P3.Epcell	CHP1
PIGQ	1.17442e-08	-0.0310233	0.211	0.282	0.00024502	P3.Epcell	PIGQ
STK4	1.17648e-08	-0.0311272	0.257	0.338	0.000245449	P3.Epcell	STK4
MVP	1.18829e-08	0.140091	0.549	0.534	0.000247912	P3.Epcell	MVP
EPRS	1.18881e-08	-0.0251175	0.351	0.446	0.000248021	P3.Epcell	EPRS
LUC7L	1.22344e-08	-0.0331111	0.281	0.362	0.000255245	P3.Epcell	LUC7L
RPS16	1.22455e-08	-0.0878155	0.996	0.995	0.000255478	P3.Epcell	RPS16
TMEM183A	1.23381e-08	0.129864	0.436	0.4	0.00025741	P3.Epcell	TMEM183A
THUMPD1	1.23516e-08	-0.0312821	0.348	0.435	0.000257691	P3.Epcell	THUMPD1
EFCAB4A	1.23665e-08	-0.0252518	0.254	0.334	0.000258002	P3.Epcell	EFCAB4A
NBL1	1.24157e-08	0.12518	0.401	0.359	0.000259029	P3.Epcell	NBL1
SF3B14	1.26468e-08	-0.0618315	0.777	0.857	0.00026385	P3.Epcell	SF3B14
ACAP2	1.27162e-08	-0.0348822	0.293	0.375	0.000265298	P3.Epcell	ACAP2
TERF2IP	1.28904e-08	-0.0448974	0.42	0.515	0.000268933	P3.Epcell	TERF2IP
RAB10	1.29639e-08	0.114788	0.674	0.68	0.000270466	P3.Epcell	RAB10
AKT1	1.30567e-08	-0.0346714	0.245	0.321	0.000272401	P3.Epcell	AKT1
CHMP4B	1.328e-08	0.106104	0.684	0.702	0.00027706	P3.Epcell	CHMP4B
AP2B1	1.3475e-08	-0.0601215	0.466	0.56	0.00028113	P3.Epcell	AP2B1
FOXO1	1.35284e-08	-0.0427449	0.226	0.295	0.000282243	P3.Epcell	FOXO1
ATP13A3	1.37075e-08	-0.0513997	0.299	0.374	0.00028598	P3.Epcell	ATP13A3
RPAIN	1.37583e-08	-0.0485307	0.456	0.554	0.00028704	P3.Epcell	RPAIN
ERICH1	1.38456e-08	-0.0297743	0.265	0.344	0.00028886	P3.Epcell	ERICH1
TPM2	1.41908e-08	-0.0711101	0.368	0.447	0.000296062	P3.Epcell	TPM2
PTCD3	1.43237e-08	-0.0258927	0.217	0.291	0.000298836	P3.Epcell	PTCD3
XBP1	1.45416e-08	0.0880924	0.861	0.868	0.000303381	P3.Epcell	XBP1
RALGAPB	1.46335e-08	-0.0311858	0.186	0.253	0.000305299	P3.Epcell	RALGAPB
CKS2	1.47089e-08	-0.0764931	0.468	0.556	0.000306872	P3.Epcell	CKS2
USP11	1.48667e-08	-0.036094	0.206	0.274	0.000310164	P3.Epcell	USP11
TFAM	1.49686e-08	-0.0389989	0.3	0.378	0.000312289	P3.Epcell	TFAM
GGPS1	1.51095e-08	-0.0391767	0.338	0.427	0.00031523	P3.Epcell	GGPS1
HOXB2	1.51191e-08	-0.0628831	0.494	0.588	0.000315429	P3.Epcell	HOXB2
CTBP2	1.53421e-08	-0.0582901	0.488	0.586	0.000320083	P3.Epcell	CTBP2
SNX14	1.55479e-08	-0.0377597	0.282	0.363	0.000324375	P3.Epcell	SNX14
MZT2B	1.58667e-08	-0.137222	0.786	0.823	0.000331026	P3.Epcell	MZT2B
TBCB	1.62569e-08	-0.0774957	0.55	0.632	0.000339167	P3.Epcell	TBCB
KDELR2	1.63754e-08	0.120397	0.707	0.709	0.000341639	P3.Epcell	KDELR2
MSRB1	1.68183e-08	-0.0289766	0.231	0.304	0.000350881	P3.Epcell	MSRB1
PIGC	1.68801e-08	-0.0283433	0.218	0.289	0.00035217	P3.Epcell	PIGC
AP1S1	1.72384e-08	0.124558	0.481	0.45	0.000359645	P3.Epcell	AP1S1
JAK1	1.73045e-08	0.126882	0.543	0.53	0.000361024	P3.Epcell	JAK1
AC011526.1	1.76345e-08	-0.143162	0.243	0.304	0.000367909	P3.Epcell	AC011526.1
BRD3	1.78705e-08	-0.030874	0.294	0.378	0.000372833	P3.Epcell	BRD3
CYB5D2	1.8448e-08	-0.0407288	0.199	0.264	0.000384881	P3.Epcell	CYB5D2
GSTZ1	1.85987e-08	-0.0329061	0.195	0.263	0.000388025	P3.Epcell	GSTZ1
UTRN	1.86189e-08	-0.0297492	0.274	0.353	0.000388446	P3.Epcell	UTRN
RSF1	1.88735e-08	-0.0471704	0.412	0.504	0.000393758	P3.Epcell	RSF1
RDH14	1.88787e-08	-0.0401764	0.315	0.399	0.000393866	P3.Epcell	RDH14
SETD5-AS1	1.88835e-08	-0.0393051	0.364	0.453	0.000393967	P3.Epcell	SETD5-AS1
CNOT4	1.91654e-08	-0.0230542	0.273	0.357	0.000399848	P3.Epcell	CNOT4
DPF2	1.9266e-08	-0.0288586	0.201	0.269	0.000401946	P3.Epcell	DPF2
SEZ6L2	1.96224e-08	-0.0424534	0.327	0.409	0.000409383	P3.Epcell	SEZ6L2
RHBDD3	1.96604e-08	-0.0405384	0.215	0.282	0.000410174	P3.Epcell	RHBDD3
COX19	1.97301e-08	-0.0441775	0.277	0.353	0.00041163	P3.Epcell	COX19
THYN1	1.98108e-08	-0.0387046	0.341	0.427	0.000413313	P3.Epcell	THYN1
PPP2R4	1.98656e-08	-0.0436687	0.378	0.463	0.000414456	P3.Epcell	PPP2R4
ARIH1	2.00723e-08	-0.0406835	0.219	0.286	0.000418769	P3.Epcell	ARIH1
ITM2C	2.09223e-08	-0.0615157	0.473	0.571	0.000436501	P3.Epcell	ITM2C
HES4	2.10903e-08	-0.122456	0.449	0.527	0.000440007	P3.Epcell	HES4
ZNF444	2.12109e-08	-0.0236205	0.195	0.263	0.000442523	P3.Epcell	ZNF444
MLEC	2.14321e-08	-0.0601884	0.521	0.619	0.000447138	P3.Epcell	MLEC
ATP5E	2.19247e-08	0.057807	0.992	0.989	0.000457415	P3.Epcell	ATP5E
IRF1	2.2067e-08	-0.0941515	0.456	0.541	0.000460383	P3.Epcell	IRF1
RPL22L1	2.20889e-08	0.138333	0.701	0.691	0.000460842	P3.Epcell	RPL22L1
LAMTOR4	2.22295e-08	-0.0757457	0.721	0.791	0.000463775	P3.Epcell	LAMTOR4
C1orf35	2.25341e-08	-0.0171939	0.214	0.289	0.00047013	P3.Epcell	C1orf35
RPS28	2.26673e-08	0.047269	0.999	0.999	0.000472907	P3.Epcell	RPS28
ARHGEF3	2.28234e-08	-0.0296951	0.205	0.271	0.000476165	P3.Epcell	ARHGEF3
IQCK	2.28461e-08	-0.0613768	0.322	0.401	0.000476639	P3.Epcell	IQCK
CSE1L	2.31472e-08	-0.0323512	0.201	0.269	0.000482919	P3.Epcell	CSE1L
SMAD5	2.34154e-08	-0.0234755	0.253	0.331	0.000488516	P3.Epcell	SMAD5
CDK10	2.36227e-08	-0.0346279	0.275	0.356	0.000492841	P3.Epcell	CDK10
DNAAF2	2.39306e-08	-0.0389742	0.248	0.32	0.000499264	P3.Epcell	DNAAF2
RPL18	2.40997e-08	-0.0971914	0.994	0.992	0.000502793	P3.Epcell	RPL18
PTPRG	2.41204e-08	-0.0402413	0.202	0.269	0.000503224	P3.Epcell	PTPRG
PLIN3	2.44566e-08	0.132976	0.476	0.444	0.000510238	P3.Epcell	PLIN3
MRPL40	2.49194e-08	-0.0544729	0.516	0.614	0.000519893	P3.Epcell	MRPL40
AGL	2.50591e-08	-0.0335875	0.201	0.269	0.000522808	P3.Epcell	AGL
TIMM9	2.51555e-08	-0.0381542	0.321	0.405	0.000524818	P3.Epcell	TIMM9
DTHD1	2.57069e-08	-0.053272	0.194	0.257	0.000536323	P3.Epcell	DTHD1
KMT2E	2.582e-08	-0.0603166	0.473	0.575	0.000538683	P3.Epcell	KMT2E
BOD1L1	2.67836e-08	-0.0367966	0.272	0.349	0.000558786	P3.Epcell	BOD1L1
KIAA1217	2.67981e-08	-0.0318525	0.329	0.414	0.000559089	P3.Epcell	KIAA1217
NDUFA7.1	2.79209e-08	-0.0604113	0.443	0.54	0.000582514	P3.Epcell	NDUFA7.1
TRMT10C	2.80046e-08	-0.0296871	0.287	0.366	0.00058426	P3.Epcell	TRMT10C
FAIM	2.80214e-08	-0.0698653	0.514	0.6	0.00058461	P3.Epcell	FAIM
UBE2L3	2.81121e-08	0.111093	0.765	0.772	0.000586503	P3.Epcell	UBE2L3
ERBB2	2.81434e-08	-0.0522147	0.4	0.489	0.000587156	P3.Epcell	ERBB2
COX6C	2.82659e-08	0.0532632	0.966	0.973	0.000589711	P3.Epcell	COX6C
OPA1	2.84184e-08	-0.0293378	0.217	0.286	0.000592892	P3.Epcell	OPA1
NDUFC2	2.87743e-08	-0.075046	0.833	0.877	0.000600318	P3.Epcell	NDUFC2
RUNDC1	2.99537e-08	-0.0286309	0.221	0.29	0.000624923	P3.Epcell	RUNDC1
R3HDM4	3.00642e-08	-0.0331664	0.31	0.393	0.00062723	P3.Epcell	R3HDM4
WAC	3.01178e-08	-0.0489012	0.424	0.514	0.000628348	P3.Epcell	WAC
MUC5AC	3.06666e-08	-0.114567	0.218	0.279	0.000639796	P3.Epcell	MUC5AC
COMMD7	3.12447e-08	-0.0261044	0.321	0.407	0.000651857	P3.Epcell	COMMD7
SH3GLB2	3.1617e-08	-0.0366297	0.21	0.278	0.000659625	P3.Epcell	SH3GLB2
KAT6B	3.21984e-08	-0.0286812	0.211	0.279	0.000671756	P3.Epcell	KAT6B
UBE2E3	3.30318e-08	-0.063037	0.557	0.652	0.000689143	P3.Epcell	UBE2E3
COBL	3.30594e-08	-0.0464481	0.236	0.306	0.000689718	P3.Epcell	COBL
AK3	3.34954e-08	-0.0530358	0.384	0.469	0.000698814	P3.Epcell	AK3
SWAP70	3.36091e-08	-0.039161	0.308	0.388	0.000701186	P3.Epcell	SWAP70
UBXN11	3.38302e-08	-0.06882	0.328	0.406	0.000705799	P3.Epcell	UBXN11
TLN1	3.44979e-08	-0.0223292	0.295	0.376	0.00071973	P3.Epcell	TLN1
PM20D2	3.45768e-08	-0.0299295	0.186	0.251	0.000721375	P3.Epcell	PM20D2
NTHL1	3.50677e-08	-0.0318091	0.199	0.267	0.000731616	P3.Epcell	NTHL1
DENND4C	3.57519e-08	-0.0204405	0.22	0.291	0.000745891	P3.Epcell	DENND4C
DVL3	3.58809e-08	-0.0357037	0.203	0.268	0.000748584	P3.Epcell	DVL3
C1GALT1	3.60377e-08	-0.0536258	0.387	0.472	0.000751855	P3.Epcell	C1GALT1
MDM4	3.61528e-08	-0.0187258	0.382	0.48	0.000754256	P3.Epcell	MDM4
RCAN3	3.69096e-08	-0.0558715	0.35	0.432	0.000770045	P3.Epcell	RCAN3
ZC3H14	3.73381e-08	-0.0384323	0.276	0.351	0.000778985	P3.Epcell	ZC3H14
LAMTOR2	3.85397e-08	0.106794	0.781	0.796	0.000804054	P3.Epcell	LAMTOR2
ATP5S	3.867e-08	-0.0350476	0.197	0.262	0.000806772	P3.Epcell	ATP5S
UBR5	3.87489e-08	-0.0391506	0.311	0.39	0.000808418	P3.Epcell	UBR5
ERF	3.95207e-08	-0.0486734	0.201	0.265	0.00082452	P3.Epcell	ERF
GNPTG	3.98706e-08	-0.0188534	0.225	0.298	0.00083182	P3.Epcell	GNPTG
CLN5	4.02688e-08	-0.0384827	0.258	0.334	0.000840129	P3.Epcell	CLN5
MYEOV2	4.07057e-08	0.0899665	0.807	0.819	0.000849244	P3.Epcell	MYEOV2
LARP1B	4.12858e-08	-0.0357608	0.255	0.328	0.000861346	P3.Epcell	LARP1B
GTF3C1	4.20004e-08	-0.0477792	0.195	0.259	0.000876254	P3.Epcell	GTF3C1
RPL39	4.26298e-08	-0.100643	0.998	0.999	0.000889387	P3.Epcell	RPL39
RALGAPA1	4.28863e-08	-0.0389579	0.271	0.343	0.000894737	P3.Epcell	RALGAPA1
REPIN1	4.29672e-08	-0.050817	0.357	0.44	0.000896425	P3.Epcell	REPIN1
ABHD14A	4.33145e-08	-0.0428451	0.255	0.326	0.00090367	P3.Epcell	ABHD14A
RASSF6	4.38112e-08	-0.0727119	0.279	0.344	0.000914032	P3.Epcell	RASSF6
ZMYND11	4.4277e-08	-0.0341264	0.278	0.356	0.000923751	P3.Epcell	ZMYND11
TPM4	4.488e-08	0.0940203	0.773	0.748	0.000936331	P3.Epcell	TPM4
VWA1	4.51051e-08	-0.0502659	0.338	0.417	0.000941027	P3.Epcell	VWA1
NDUFB5	4.66043e-08	0.102481	0.668	0.67	0.000972306	P3.Epcell	NDUFB5
SLAIN2	4.81578e-08	-0.0457088	0.383	0.466	0.00100472	P3.Epcell	SLAIN2
PPP3CA	4.87989e-08	0.154656	0.405	0.367	0.00101809	P3.Epcell	PPP3CA
PRELID1	4.96382e-08	0.105008	0.721	0.729	0.0010356	P3.Epcell	PRELID1
KIAA0247	4.97372e-08	-0.0565715	0.361	0.443	0.00103767	P3.Epcell	KIAA0247
ATP6V0B	5.01058e-08	0.109798	0.736	0.773	0.00104536	P3.Epcell	ATP6V0B
WRNIP1	5.03037e-08	-0.0382148	0.206	0.271	0.00104949	P3.Epcell	WRNIP1
HNRNPC	5.0677e-08	-0.0544184	0.876	0.924	0.00105727	P3.Epcell	HNRNPC
EIF4G2	5.09712e-08	0.0886502	0.86	0.877	0.00106341	P3.Epcell	EIF4G2
CNOT6	5.11822e-08	-0.0399482	0.227	0.295	0.00106781	P3.Epcell	CNOT6
ANAPC4	5.15859e-08	-0.0560795	0.431	0.521	0.00107624	P3.Epcell	ANAPC4
TNFAIP2	5.2622e-08	0.0968176	0.636	0.587	0.00109785	P3.Epcell	TNFAIP2
PLOD1	5.28042e-08	-0.0172495	0.207	0.276	0.00110165	P3.Epcell	PLOD1
UPF3B	5.29065e-08	-0.0215594	0.207	0.276	0.00110379	P3.Epcell	UPF3B
ATOX1	5.35798e-08	0.10802	0.739	0.748	0.00111784	P3.Epcell	ATOX1
TTC3	5.44924e-08	-0.057428	0.654	0.737	0.00113687	P3.Epcell	TTC3
NDUFAF4	5.50488e-08	-0.0169279	0.212	0.282	0.00114848	P3.Epcell	NDUFAF4
MAML2	5.67485e-08	-0.0196731	0.223	0.295	0.00118394	P3.Epcell	MAML2
C5orf24	5.76312e-08	-0.0351008	0.367	0.458	0.00120236	P3.Epcell	C5orf24
FNBP4	5.95954e-08	-0.0288052	0.376	0.465	0.00124334	P3.Epcell	FNBP4
WDR33	6.00146e-08	-0.0279549	0.309	0.388	0.00125208	P3.Epcell	WDR33
CREBZF	6.09373e-08	-0.0290677	0.21	0.277	0.00127133	P3.Epcell	CREBZF
DICER1	6.1295e-08	-0.0355871	0.367	0.453	0.0012788	P3.Epcell	DICER1
TTC17	6.26824e-08	-0.0307057	0.356	0.442	0.00130774	P3.Epcell	TTC17
CDC42SE2	6.41341e-08	0.132121	0.608	0.595	0.00133803	P3.Epcell	CDC42SE2
TRAPPC2L	6.44152e-08	0.13119	0.584	0.582	0.00134389	P3.Epcell	TRAPPC2L
MBOAT1	6.4701e-08	0.128138	0.366	0.324	0.00134986	P3.Epcell	MBOAT1
STYXL1	6.47914e-08	-0.0311319	0.292	0.366	0.00135174	P3.Epcell	STYXL1
DYNC1LI2	6.4872e-08	-0.0456335	0.429	0.525	0.00135342	P3.Epcell	DYNC1LI2
PTBP1	6.51338e-08	-0.0466997	0.465	0.559	0.00135889	P3.Epcell	PTBP1
SPECC1	6.55856e-08	0.116465	0.547	0.522	0.00136831	P3.Epcell	SPECC1
FLOT2	6.61248e-08	-0.0308552	0.222	0.291	0.00137956	P3.Epcell	FLOT2
MTA1	6.81557e-08	-0.0342795	0.448	0.542	0.00142193	P3.Epcell	MTA1
XPNPEP3	6.84001e-08	-0.0349671	0.224	0.293	0.00142703	P3.Epcell	XPNPEP3
PRAME	6.84268e-08	-0.0312513	0.398	0.488	0.00142759	P3.Epcell	PRAME
SNTN	6.85165e-08	-0.166843	0.292	0.345	0.00142946	P3.Epcell	SNTN
HNRNPLL	7.02457e-08	-0.0329881	0.247	0.319	0.00146554	P3.Epcell	HNRNPLL
RAB1A	7.07469e-08	0.0904642	0.758	0.769	0.00147599	P3.Epcell	RAB1A
PPP5C	7.50167e-08	-0.0284543	0.203	0.269	0.00156507	P3.Epcell	PPP5C
PTPRM	7.52533e-08	-0.043863	0.245	0.311	0.00157001	P3.Epcell	PTPRM
UBL7	7.58039e-08	-0.0112164	0.223	0.296	0.0015815	P3.Epcell	UBL7
PKP3	7.81809e-08	0.119481	0.417	0.378	0.00163109	P3.Epcell	PKP3
TMEM60	7.91943e-08	-0.0372482	0.236	0.303	0.00165223	P3.Epcell	TMEM60
KIAA0319L	7.94295e-08	-0.0180925	0.222	0.291	0.00165714	P3.Epcell	KIAA0319L
RAB3GAP1	7.9613e-08	-0.0372465	0.268	0.34	0.00166097	P3.Epcell	RAB3GAP1
PLTP	8.14208e-08	-0.133818	0.415	0.487	0.00169868	P3.Epcell	PLTP
YTHDC2	8.17943e-08	-0.0245211	0.198	0.263	0.00170647	P3.Epcell	YTHDC2
MAP4K5	8.23398e-08	-0.0263785	0.27	0.345	0.00171786	P3.Epcell	MAP4K5
UQCRC1	8.26506e-08	-0.0393013	0.533	0.632	0.00172434	P3.Epcell	UQCRC1
SSBP4	8.31807e-08	-0.0384573	0.387	0.48	0.0017354	P3.Epcell	SSBP4
UGGT1	8.36114e-08	-0.0223726	0.215	0.28	0.00174438	P3.Epcell	UGGT1
CDKN2B	8.40124e-08	0.0766863	0.256	0.202	0.00175275	P3.Epcell	CDKN2B
PITHD1	8.41273e-08	-0.0249241	0.192	0.258	0.00175515	P3.Epcell	PITHD1
ATP6V0E1	8.43042e-08	0.070725	0.908	0.917	0.00175884	P3.Epcell	ATP6V0E1
WIPI1	8.54358e-08	-0.0442825	0.22	0.285	0.00178245	P3.Epcell	WIPI1
DNAJB14	8.55841e-08	-0.0313379	0.317	0.396	0.00178554	P3.Epcell	DNAJB14
FAM172A	8.64265e-08	-0.0380889	0.211	0.276	0.00180312	P3.Epcell	FAM172A
HCST	8.69615e-08	-0.0332443	0.198	0.262	0.00181428	P3.Epcell	HCST
RPL23	8.75569e-08	-0.0722499	0.985	0.986	0.0018267	P3.Epcell	RPL23
PGPEP1	8.9523e-08	-0.0310537	0.214	0.278	0.00186772	P3.Epcell	PGPEP1
SET	9.1028e-08	0.135337	0.864	0.852	0.00189912	P3.Epcell	SET
PSIP1	9.11747e-08	-0.0251378	0.301	0.382	0.00190218	P3.Epcell	PSIP1
GUK1	9.36093e-08	0.0967833	0.872	0.89	0.00195297	P3.Epcell	GUK1
RBM22	9.46333e-08	-0.0273135	0.203	0.27	0.00197433	P3.Epcell	RBM22
FAM89B	9.5265e-08	-0.0231453	0.193	0.255	0.00198751	P3.Epcell	FAM89B
EMD	9.73926e-08	-0.027714	0.304	0.382	0.0020319	P3.Epcell	EMD
PLS3	9.89295e-08	0.0943385	0.344	0.297	0.00206397	P3.Epcell	PLS3
GHITM	9.98533e-08	-0.0454342	0.562	0.667	0.00208324	P3.Epcell	GHITM
FAM127A	1.01585e-07	-0.0217532	0.257	0.333	0.00211936	P3.Epcell	FAM127A
CD47	1.02321e-07	0.122574	0.765	0.785	0.00213473	P3.Epcell	CD47
TMBIM6	1.0268e-07	-0.0723518	0.838	0.888	0.00214221	P3.Epcell	TMBIM6
IQCE	1.02933e-07	-0.0383241	0.201	0.264	0.00214749	P3.Epcell	IQCE
UBR3	1.04309e-07	-0.018816	0.187	0.252	0.0021762	P3.Epcell	UBR3
NCALD	1.06809e-07	-0.0327102	0.293	0.368	0.00222836	P3.Epcell	NCALD
XPOT	1.06866e-07	-0.0466311	0.275	0.343	0.00222954	P3.Epcell	XPOT
CKLF	1.10199e-07	-0.065256	0.522	0.621	0.00229908	P3.Epcell	CKLF
LSM14A	1.1109e-07	-0.0435516	0.479	0.576	0.00231767	P3.Epcell	LSM14A
CEP104	1.11208e-07	-0.0318253	0.211	0.277	0.00232012	P3.Epcell	CEP104
C2orf76	1.11818e-07	-0.031183	0.226	0.295	0.00233286	P3.Epcell	C2orf76
PAXBP1	1.14276e-07	-0.0312837	0.22	0.287	0.00238414	P3.Epcell	PAXBP1
FBXO11	1.15066e-07	-0.0327402	0.261	0.332	0.00240063	P3.Epcell	FBXO11
NUP153	1.15508e-07	-0.035681	0.196	0.259	0.00240983	P3.Epcell	NUP153
CAP1	1.157e-07	0.0999832	0.663	0.661	0.00241385	P3.Epcell	CAP1
ZNF440	1.16686e-07	-0.0425471	0.195	0.255	0.00243441	P3.Epcell	ZNF440
ACBD6	1.18575e-07	-0.0201643	0.199	0.266	0.00247383	P3.Epcell	ACBD6
LAMTOR5	1.21541e-07	0.0751937	0.882	0.89	0.00253571	P3.Epcell	LAMTOR5
KIAA0232	1.21687e-07	-0.044378	0.311	0.386	0.00253876	P3.Epcell	KIAA0232
AHNAK	1.23862e-07	-0.0617799	0.505	0.599	0.00258414	P3.Epcell	AHNAK
FAM208B	1.25255e-07	-0.0201859	0.26	0.334	0.0026132	P3.Epcell	FAM208B
YWHAZ	1.26039e-07	0.0912244	0.842	0.854	0.00262955	P3.Epcell	YWHAZ
ATM	1.26169e-07	-0.0262836	0.206	0.27	0.00263226	P3.Epcell	ATM
IFT52	1.26732e-07	-0.0283009	0.208	0.274	0.00264401	P3.Epcell	IFT52
FAM192A	1.29057e-07	-0.0261084	0.434	0.532	0.00269251	P3.Epcell	FAM192A
RAB5C	1.29137e-07	0.118337	0.57	0.569	0.00269418	P3.Epcell	RAB5C
CASP4	1.29758e-07	0.122956	0.497	0.48	0.00270715	P3.Epcell	CASP4
DDT	1.34802e-07	0.105474	0.75	0.766	0.00281237	P3.Epcell	DDT
INTS3	1.35135e-07	-0.020867	0.253	0.328	0.00281933	P3.Epcell	INTS3
STK25	1.36273e-07	-0.0261125	0.254	0.325	0.00284305	P3.Epcell	STK25
SLC39A8	1.37284e-07	0.0017122	0.216	0.289	0.00286416	P3.Epcell	SLC39A8
KIAA0100	1.4021e-07	-0.0297646	0.19	0.251	0.00292521	P3.Epcell	KIAA0100
DRAP1	1.424e-07	-0.0611387	0.584	0.676	0.00297089	P3.Epcell	DRAP1
TMEM69	1.42765e-07	-0.0305098	0.213	0.278	0.00297851	P3.Epcell	TMEM69
PDCD6	1.43181e-07	0.103266	0.728	0.751	0.00298719	P3.Epcell	PDCD6
FAM208A	1.43652e-07	-0.027879	0.261	0.334	0.002997	P3.Epcell	FAM208A
SUB1	1.45272e-07	0.0746973	0.935	0.949	0.00303081	P3.Epcell	SUB1
POLR3K	1.45588e-07	-0.0254462	0.269	0.343	0.00303739	P3.Epcell	POLR3K
CTNND1	1.45654e-07	-0.0666809	0.467	0.553	0.00303878	P3.Epcell	CTNND1
YEATS4	1.46409e-07	-0.015561	0.239	0.311	0.00305452	P3.Epcell	YEATS4
KDM5C	1.4787e-07	-0.030039	0.232	0.3	0.00308501	P3.Epcell	KDM5C
RUNX1	1.49493e-07	-0.0729714	0.275	0.344	0.00311886	P3.Epcell	RUNX1
NADK	1.49768e-07	-0.0292679	0.218	0.284	0.00312461	P3.Epcell	NADK
SLFN5	1.52698e-07	-0.0754616	0.543	0.621	0.00318573	P3.Epcell	SLFN5
VPS36	1.52798e-07	-0.0149066	0.288	0.368	0.00318782	P3.Epcell	VPS36
TAF6	1.53109e-07	-0.0153151	0.203	0.269	0.00319432	P3.Epcell	TAF6
YIPF4	1.55049e-07	-0.0361233	0.416	0.508	0.00323479	P3.Epcell	YIPF4
RPL32	1.55623e-07	-0.0928098	1	0.999	0.00324675	P3.Epcell	RPL32
BCL7A	1.60305e-07	-0.0237463	0.221	0.29	0.00334445	P3.Epcell	BCL7A
SBF2	1.60339e-07	-0.043345	0.199	0.259	0.00334515	P3.Epcell	SBF2
MAZ	1.61454e-07	-0.0367161	0.346	0.424	0.0033684	P3.Epcell	MAZ
CTSV	1.62861e-07	-0.0251711	0.254	0.327	0.00339778	P3.Epcell	CTSV
SMAD4	1.65926e-07	-0.0301381	0.23	0.298	0.00346171	P3.Epcell	SMAD4
SCRN2	1.66266e-07	-0.0250077	0.221	0.289	0.00346882	P3.Epcell	SCRN2
NSMCE1	1.67295e-07	-0.0330368	0.431	0.526	0.00349028	P3.Epcell	NSMCE1
CETN3	1.679e-07	-0.037877	0.32	0.4	0.00350289	P3.Epcell	CETN3
FAM173A	1.70402e-07	-0.023832	0.341	0.427	0.0035551	P3.Epcell	FAM173A
MECR	1.71221e-07	-0.0337201	0.209	0.273	0.00357218	P3.Epcell	MECR
PPP3CB	1.73583e-07	-0.0314412	0.217	0.281	0.00362146	P3.Epcell	PPP3CB
RB1	1.75636e-07	-0.0353798	0.401	0.494	0.0036643	P3.Epcell	RB1
DNM1L	1.76334e-07	-0.0253288	0.269	0.344	0.00367885	P3.Epcell	DNM1L
ALDH2	1.76395e-07	-0.0380871	0.325	0.407	0.00368014	P3.Epcell	ALDH2
GIPC1	1.76972e-07	0.137541	0.589	0.601	0.00369216	P3.Epcell	GIPC1
RGS10	1.7785e-07	-0.0972888	0.542	0.613	0.00371049	P3.Epcell	RGS10
FKBP1A	1.78693e-07	0.0957374	0.813	0.838	0.00372807	P3.Epcell	FKBP1A
RASGEF1B	1.79457e-07	0.143078	0.274	0.233	0.00374402	P3.Epcell	RASGEF1B
OTUD5	1.81019e-07	-0.0322498	0.194	0.253	0.0037766	P3.Epcell	OTUD5
WAPAL	1.82641e-07	-0.0276808	0.314	0.393	0.00381045	P3.Epcell	WAPAL
NSL1	1.85215e-07	-0.0296791	0.237	0.306	0.00386414	P3.Epcell	NSL1
FGD5-AS1	1.85391e-07	-0.0287207	0.351	0.434	0.00386781	P3.Epcell	FGD5-AS1
COX4I1	1.85571e-07	0.0678714	0.971	0.97	0.00387156	P3.Epcell	COX4I1
SMARCB1	1.86096e-07	-0.0311783	0.389	0.474	0.00388252	P3.Epcell	SMARCB1
TMEM107	1.86965e-07	-0.0542961	0.331	0.407	0.00390065	P3.Epcell	TMEM107
TMEM30A	1.88147e-07	0.130554	0.559	0.566	0.00392531	P3.Epcell	TMEM30A
RTF1	1.89313e-07	-0.0531108	0.57	0.668	0.00394964	P3.Epcell	RTF1
ZNF580	1.93594e-07	-0.0192602	0.22	0.285	0.00403895	P3.Epcell	ZNF580
USP7	1.93602e-07	-0.0247428	0.254	0.326	0.00403912	P3.Epcell	USP7
KDM4B	1.94138e-07	-0.0269506	0.242	0.308	0.00405031	P3.Epcell	KDM4B
PFDN6	1.94666e-07	-0.0643937	0.599	0.696	0.00406132	P3.Epcell	PFDN6
PRKCSH	1.95299e-07	-0.040229	0.456	0.543	0.00407452	P3.Epcell	PRKCSH
ACADM	1.97363e-07	-0.009666	0.258	0.336	0.00411757	P3.Epcell	ACADM
CHD4	1.97671e-07	-0.0318604	0.377	0.466	0.00412402	P3.Epcell	CHD4
SRSF10	1.98502e-07	-0.0210912	0.265	0.337	0.00414135	P3.Epcell	SRSF10
SLIRP	1.98555e-07	0.0811737	0.872	0.877	0.00414246	P3.Epcell	SLIRP
TMED2	1.9892e-07	0.101272	0.798	0.819	0.00415008	P3.Epcell	TMED2
PTPLAD1	2.02331e-07	-0.0541289	0.382	0.466	0.00422122	P3.Epcell	PTPLAD1
KIAA1430	2.0897e-07	-0.0381163	0.426	0.515	0.00435975	P3.Epcell	KIAA1430
HYAL2	2.10429e-07	-0.0262136	0.224	0.291	0.00439018	P3.Epcell	HYAL2
M6PR	2.12559e-07	-0.0278086	0.373	0.458	0.00443461	P3.Epcell	M6PR
GINM1	2.15165e-07	-0.0345348	0.344	0.425	0.00448898	P3.Epcell	GINM1
MRPL52	2.1924e-07	0.0984807	0.709	0.732	0.00457401	P3.Epcell	MRPL52
HK2	2.23887e-07	0.102235	0.258	0.211	0.00467096	P3.Epcell	HK2
PAK1IP1	2.25956e-07	-0.00634577	0.227	0.299	0.00471412	P3.Epcell	PAK1IP1
ATG4B	2.26178e-07	-0.0337428	0.294	0.371	0.00471875	P3.Epcell	ATG4B
CHD8	2.30919e-07	-0.0233104	0.193	0.256	0.00481767	P3.Epcell	CHD8
SMC5	2.372e-07	-0.0332337	0.299	0.374	0.00494871	P3.Epcell	SMC5
BAG5	2.38429e-07	-0.0300087	0.354	0.436	0.00497434	P3.Epcell	BAG5
HUWE1	2.46469e-07	-0.0259913	0.318	0.397	0.00514208	P3.Epcell	HUWE1
LYPLA1	2.4653e-07	0.114606	0.672	0.69	0.00514336	P3.Epcell	LYPLA1
EIF2S2	2.47853e-07	0.0777915	0.843	0.848	0.00517096	P3.Epcell	EIF2S2
GBP3	2.48882e-07	0.121045	0.461	0.442	0.00519243	P3.Epcell	GBP3
ZMPSTE24	2.49315e-07	-0.0318702	0.347	0.431	0.00520146	P3.Epcell	ZMPSTE24
C18orf32	2.52982e-07	-0.0481262	0.277	0.345	0.00527796	P3.Epcell	C18orf32
SYAP1	2.5504e-07	0.0919046	0.771	0.79	0.0053209	P3.Epcell	SYAP1
EXOSC1	2.59936e-07	-0.0242306	0.276	0.349	0.00542305	P3.Epcell	EXOSC1
FKBP11	2.6056e-07	-0.0459412	0.254	0.321	0.00543606	P3.Epcell	FKBP11
TFG	2.71143e-07	0.119829	0.608	0.625	0.00565686	P3.Epcell	TFG
AIG1	2.75736e-07	0.127764	0.522	0.517	0.00575268	P3.Epcell	AIG1
UBAP2	2.75767e-07	-0.0189999	0.24	0.31	0.00575332	P3.Epcell	UBAP2
PCBP1	2.7703e-07	-0.0683913	0.791	0.854	0.00577969	P3.Epcell	PCBP1
FAM162A	2.80367e-07	0.137732	0.644	0.659	0.00584929	P3.Epcell	FAM162A
SYMPK	2.87514e-07	-0.0220524	0.244	0.316	0.00599841	P3.Epcell	SYMPK
PRKDC	2.8799e-07	-0.0444293	0.422	0.502	0.00600833	P3.Epcell	PRKDC
ZNF3	2.88184e-07	-0.023292	0.221	0.289	0.00601238	P3.Epcell	ZNF3
AP2A2	2.88987e-07	-0.0331338	0.328	0.405	0.00602914	P3.Epcell	AP2A2
HLA-E	2.94114e-07	0.090019	0.773	0.812	0.00613609	P3.Epcell	HLA-E
UACA	2.96228e-07	-0.0534043	0.381	0.466	0.00618021	P3.Epcell	UACA
NOC2L	2.96997e-07	-0.0350851	0.26	0.329	0.00619625	P3.Epcell	NOC2L
FAM3C	2.98313e-07	-0.0785853	0.617	0.692	0.00622371	P3.Epcell	FAM3C
BNIP3	2.98781e-07	0.154742	0.444	0.409	0.00623347	P3.Epcell	BNIP3
CMBL	2.9906e-07	-0.0124519	0.187	0.251	0.00623929	P3.Epcell	CMBL
LBR	3.02571e-07	-0.0245169	0.23	0.297	0.00631254	P3.Epcell	LBR
SAMD9	3.04941e-07	0.112206	0.263	0.22	0.00636198	P3.Epcell	SAMD9
PARP1	3.05225e-07	-0.0183392	0.44	0.534	0.0063679	P3.Epcell	PARP1
FOPNL	3.07365e-07	-0.029763	0.196	0.257	0.00641255	P3.Epcell	FOPNL
HDGF	3.10607e-07	-0.0576377	0.561	0.661	0.00648019	P3.Epcell	HDGF
C7orf55-LUC7L2	3.11105e-07	-0.0272427	0.336	0.418	0.00649059	P3.Epcell	C7orf55-LUC7L2
BCLAF1	3.12611e-07	-0.0653741	0.591	0.677	0.006522	P3.Epcell	BCLAF1
ST14	3.13389e-07	0.151484	0.531	0.535	0.00653824	P3.Epcell	ST14
SUZ12	3.15134e-07	-0.0333246	0.3	0.374	0.00657464	P3.Epcell	SUZ12
CCP110	3.20383e-07	-0.0582688	0.266	0.333	0.00668414	P3.Epcell	CCP110
KDM3B	3.205e-07	-0.0238181	0.214	0.28	0.0066866	P3.Epcell	KDM3B
GARS	3.25118e-07	-0.0178421	0.282	0.36	0.00678293	P3.Epcell	GARS
PLBD1	3.28308e-07	0.114622	0.297	0.255	0.0068495	P3.Epcell	PLBD1
ABHD11	3.33544e-07	-0.0662945	0.544	0.638	0.00695874	P3.Epcell	ABHD11
MYO5B	3.43295e-07	0.101566	0.339	0.298	0.00716216	P3.Epcell	MYO5B
ATP6V1F	3.44759e-07	0.0902836	0.76	0.784	0.00719272	P3.Epcell	ATP6V1F
CCDC59	3.51256e-07	-0.0195808	0.33	0.413	0.00732825	P3.Epcell	CCDC59
OS9	3.52926e-07	-0.0263377	0.38	0.464	0.00736309	P3.Epcell	OS9
RPIA	3.56877e-07	-0.0325167	0.266	0.334	0.00744553	P3.Epcell	RPIA
DLG3	3.6131e-07	-0.0215023	0.21	0.274	0.00753801	P3.Epcell	DLG3
CHORDC1	3.69802e-07	-0.0143783	0.413	0.505	0.00771518	P3.Epcell	CHORDC1
HRH1	3.74053e-07	0.0828006	0.26	0.213	0.00780387	P3.Epcell	HRH1
DUSP1	3.80605e-07	-0.185535	0.893	0.918	0.00794057	P3.Epcell	DUSP1
TMED7	3.84134e-07	-0.0459779	0.471	0.565	0.00801419	P3.Epcell	TMED7
CASC4	3.85206e-07	-0.0440949	0.471	0.567	0.00803656	P3.Epcell	CASC4
MAGEF1	3.87091e-07	-0.030278	0.313	0.39	0.00807589	P3.Epcell	MAGEF1
NABP1	3.91844e-07	-0.0403351	0.215	0.278	0.00817505	P3.Epcell	NABP1
PFKL	3.92468e-07	-0.0145067	0.437	0.533	0.00818806	P3.Epcell	PFKL
TOPORS-AS1	3.93861e-07	-0.0376889	0.299	0.373	0.00821712	P3.Epcell	TOPORS-AS1
RBBP4	4.05899e-07	-0.0258076	0.525	0.625	0.00846827	P3.Epcell	RBBP4
ATXN7L3B	4.10194e-07	-0.0342512	0.296	0.369	0.00855788	P3.Epcell	ATXN7L3B
ODF3B	4.10345e-07	-0.222563	0.55	0.592	0.00856103	P3.Epcell	ODF3B
ISOC1	4.12986e-07	-0.0323442	0.358	0.44	0.00861614	P3.Epcell	ISOC1
NIT2	4.15056e-07	-0.025235	0.382	0.465	0.00865931	P3.Epcell	NIT2
VCL	4.18895e-07	-0.0315516	0.319	0.396	0.00873941	P3.Epcell	VCL
SEL1L3	4.19571e-07	-0.0319162	0.278	0.349	0.0087535	P3.Epcell	SEL1L3
FAM13A	4.23081e-07	-0.0479819	0.281	0.348	0.00882675	P3.Epcell	FAM13A
ABHD12	4.29259e-07	-0.0339081	0.276	0.347	0.00895564	P3.Epcell	ABHD12
CPSF2	4.39965e-07	-0.0375421	0.242	0.308	0.00917898	P3.Epcell	CPSF2
CHPF	4.40428e-07	-0.0346894	0.33	0.406	0.00918866	P3.Epcell	CHPF
SMAD2	4.43172e-07	-0.0299917	0.362	0.445	0.0092459	P3.Epcell	SMAD2
NIPSNAP3A	4.4388e-07	-0.0268084	0.317	0.392	0.00926068	P3.Epcell	NIPSNAP3A
SF3A3	4.56644e-07	-0.0191675	0.216	0.282	0.00952697	P3.Epcell	SF3A3
CRNDE	4.70604e-07	-0.105272	0.312	0.365	0.0098182	P3.Epcell	CRNDE
CHCHD2	4.80252e-07	0.0748114	0.961	0.949	0.0100195	P3.Epcell	CHCHD2
FXR1	4.82031e-07	-0.0547557	0.501	0.595	0.0100566	P3.Epcell	FXR1
MBD6	4.83697e-07	-0.0341166	0.199	0.256	0.0100914	P3.Epcell	MBD6
MKNK2	4.88171e-07	-0.0390547	0.41	0.494	0.0101847	P3.Epcell	MKNK2
LRRIQ1	4.90764e-07	-0.195676	0.385	0.427	0.0102388	P3.Epcell	LRRIQ1
TRPC4AP	4.91168e-07	-0.0183936	0.198	0.263	0.0102472	P3.Epcell	TRPC4AP
EIF1	4.92657e-07	0.0405388	0.995	0.996	0.0102783	P3.Epcell	EIF1
TCTN3	4.9417e-07	-0.0322435	0.233	0.301	0.0103099	P3.Epcell	TCTN3
GPD2	4.99365e-07	-0.0363038	0.242	0.306	0.0104183	P3.Epcell	GPD2
PHLDA1	5.157e-07	0.0881687	0.282	0.231	0.0107591	P3.Epcell	PHLDA1
U2AF2	5.26095e-07	-0.0189536	0.295	0.371	0.0109759	P3.Epcell	U2AF2
CUL1	5.27394e-07	-0.0165777	0.19	0.252	0.011003	P3.Epcell	CUL1
DHPS	5.29467e-07	-0.0211244	0.323	0.404	0.0110463	P3.Epcell	DHPS
KLHDC10	5.39822e-07	-0.0443329	0.206	0.262	0.0112623	P3.Epcell	KLHDC10
TCEB2	5.44259e-07	0.0687712	0.959	0.963	0.0113549	P3.Epcell	TCEB2
SECISBP2L	5.44601e-07	-0.0465947	0.372	0.446	0.011362	P3.Epcell	SECISBP2L
NCLN	5.45501e-07	-0.0166644	0.197	0.259	0.0113808	P3.Epcell	NCLN
INO80E	5.47745e-07	-0.0256204	0.223	0.286	0.0114276	P3.Epcell	INO80E
WDR66	5.49196e-07	-0.109223	0.326	0.387	0.0114579	P3.Epcell	WDR66
BRD2	5.49624e-07	-0.0603885	0.516	0.6	0.0114668	P3.Epcell	BRD2
IL18	5.53057e-07	0.109265	0.328	0.286	0.0115384	P3.Epcell	IL18
EIF4B	5.57316e-07	-0.0520266	0.703	0.787	0.0116273	P3.Epcell	EIF4B
USP47	5.57824e-07	-0.0173476	0.328	0.41	0.0116379	P3.Epcell	USP47
STAU2	5.61138e-07	-0.0123648	0.228	0.297	0.011707	P3.Epcell	STAU2
P4HTM	5.65175e-07	-0.0667905	0.428	0.513	0.0117913	P3.Epcell	P4HTM
[truncated: 8,530 more rows]
