# Supplementary material for: Phenotyping of immune and endometrial epithelial cells in endometrial carcinomas revealed by single-cell RNA sequencing
Source: Aging (Albany NY). 2021 Jan 10;13(5):6565–91. doi: 10.18632/aging.202288 (PMC7993685; doi:10.18632/aging.202288)
Supplement: Additional File 3 [file aging-13-202288-s004.xlsx]

## Sheet: Para.Myeloid.AverageExpression
Additional File 3. Average expression.
	0	1	2	3	4	5	6	7	8	9	10	11
RP11-34P13.7	0.00698502	0	0	0	0.011661	0	0	0.0224092	0	0	0.0608761	0
AL627309.1	0.0120492	0.00823862	0.0766066	0.0437946	0.00965372	0.0113225	0.0991941	0.00746793	0.0680239	0.0392712	0	0
AP006222.2	0.139218	0.0919933	0.0392595	0.214049	0.113552	0.0976248	0	0.287843	0.0340483	0.0602715	0.0714725	0.0481372
RP4-669L17.10	0	0	0	0.00237324	0	0.00998052	0	0	0	0.0526144	0	0
RP11-206L10.3	0.0446142	0.0155668	0.073671	0.0107273	0.0579459	0.019896	0.023892	0	0.076228	0.0320898	0.0585381	0.0211942
RP11-206L10.2	0.0545062	0.0218133	0.0456313	0.0400034	0.0642733	0.0183846	0.123952	0.0378761	0.0821807	0.0762089	0.0524753	0.158459
RP11-206L10.9	0.0255465	0.00724466	0.0135495	0.0160612	0.00914119	0.0858706	0	0	0.0274583	0.0300517	0	0.0728231
LINC00115	0.0587186	0.0190966	0.0304345	0.0897748	0.0361793	0.0131661	0	0.0248249	0.0748568	0.017135	0.0524753	0.046295
FAM41C	0.0179412	0.0299469	0.00758781	0.0225685	0.0348749	0.0173532	0	0	0.0619108	0.0661513	0	0.032317
SAMD11	0.0107383	0	0.0286674	0.00619023	0	0.00559382	0	0	0	0.240546	0.280015	0
NOC2L	0.234543	0.301646	0.18779	0.269618	0.248489	0.277896	0.0627627	0.13502	0.324742	0.416476	0.625521	0.175672
KLHL17	0.00973877	0	0	0.00752552	0.00979941	0.0278876	0.0352995	0.00575353	0	0.0309398	0	0
PLEKHN1	0.0101719	0.0192285	0.0199508	0	0	0.0171427	0	0	0.0297984	0.0179094	0.129066	0
RP11-54O7.17	0.00821917	0	0.0101857	0	0.0207958	0.0116235	0.00511051	0	0.0519772	0.0427415	0	0
HES4	0.2511	0.198087	0.115002	0.224323	0.424533	0.0578472	0.1757	0.130005	1.88805	0.637761	0.143939	0.056656
ISG15	1.89415	1.72846	1.60243	5.73864	0.569184	0.963645	2.33814	2.0821	5.63233	2.06159	1.00071	1.56733
AGRN	0.0473869	0.0735085	0.0135066	0.0868537	0.0215017	0.0507147	0.0299383	0.00746793	0	0.178394	0	0.109776
C1orf159	0.0398437	0.0313458	0.0238409	0.0342427	0.0165729	0.0192086	0.0346991	0.00575353	0.0463444	0.0652119	0	0.0506613
TTLL10	0.0148344	0.0470862	0	0.0110151	0	0.0109833	0.05326	0.0729789	0	0.0322441	0	0.0567299
TNFRSF18	0.0794858	0.245582	0.0747749	0.102857	0.178695	0.055363	0.134819	0.0328068	0.0633923	0.202826	7.48482	0.61533
TNFRSF4	0.178627	0.470116	0.0362354	0.179629	0.0337431	0.154415	0	0.0258784	0.0619694	0.201009	3.95183	0.263798
SDF4	0.82777	0.74869	0.462384	0.531808	0.474237	0.521962	0.663534	0.788242	0.464994	1.04035	1.01779	0.846446
B3GALT6	0.153765	0.123836	0.0955085	0.126113	0.0506372	0.142778	0.0453213	0.087179	0.2002	0.242695	0	0.19861
FAM132A	0.00766919	0	0	0.00632644	0	0	0	0	0	0	0	0
UBE2J2	0.264813	0.339119	0.325294	0.257323	0.309367	0.182835	0.253521	0.241665	0.382036	0.212266	0.204409	0.501745
SCNN1D	0.00325989	0	0.0094883	0	0	0	0	0	0.0274583	0.0136232	0	0
ACAP3	0.0351268	0.110711	0.147027	0.0564395	0.0772052	0.0786496	0.134819	0.0354693	0	0.177071	0	0.0717085
PUSL1	0.0865705	0.0740841	0.0943741	0.0725151	0.084435	0.0606021	0.075525	0.119565	0.160606	0.157762	0.121752	0.198461
CPSF3L	0.184858	0.235996	0.323076	0.297903	0.364491	0.326735	0.241511	0.23003	0.463944	0.460749	0.208366	0.291296
GLTPD1	0.0758983	0.0778761	0	0.0405354	0.0482827	0.0404688	0.0871938	0.0333845	0.16365	0.126367	0.120292	0.0522736
DVL1	0.0174731	0.0291786	0.0171793	0.00370274	0.0269913	0.0364508	0	0	0.0773291	0.0702844	0.0608761	0.125702
MXRA8	0.0451247	0.0155092	0.0514357	0	0.0674945	0.0221534	0	0	0	0.632266	0.188453	0
AURKAIP1	1.14151	1.18539	1.51138	1.26727	0.801526	1.10258	1.78304	1.43572	1.47131	1.22264	1.04994	1.37654
CCNL2	0.364111	0.28744	0.227554	0.210427	0.604211	0.467938	0.381793	0.292192	0.514045	1.00979	0.977184	0.549003
RP4-758J18.2	0.0623797	0.0299186	0.0457479	0.0115292	0.0596539	0.0256436	0.0696739	0.0343484	0.0795988	0.15089	0.0526319	0
MRPL20	1.06338	1.24179	1.12615	1.136	1.12436	1.03139	1.14737	1.47182	1.15143	1.01055	1.14148	1.54474
ANKRD65	0.0110201	0.041492	0.0120433	0.0279853	0.0105402	0.0471249	0	0.0441944	0	0.00850602	0	0.0506613
VWA1	0.0303337	0.0194391	0.0227634	0.00809954	0.0169188	0	0.00511051	0	0	0.0957812	0.0608761	0.0632139
ATAD3C	0.00292254	0.0421568	0.0105129	0.00711837	0.00971874	0.0366123	0.0564013	0.0184043	0	0.0322227	0	0
ATAD3B	0.0461284	0.068905	0.0838236	0.0906554	0.042507	0.0395331	0.00511051	0.101947	0.0234471	0.0751074	0.141498	0.127773
ATAD3A	0.0795704	0.144493	0.0892246	0.17057	0.0926014	0.0624508	0.0474612	0.0144025	0.0592822	0.0977922	0.0961501	0.115114
SSU72	1.24927	1.18815	1.43877	1.22826	1.05297	1.1529	1.04246	1.45166	1.10667	1.07395	1.15636	0.804306
AL645728.1	0.0262422	0.0127262	0.00979557	0.0575004	0.0391425	0.00733504	0.0484503	0.0144025	0.0391242	0.0317142	0.0585381	0.0350192
C1orf233	0.0111327	0.0107465	0	0.0637681	0	0.00889743	0.0683949	0.0149359	0	0.0162549	0	0
RP11-345P4.9	0.0246473	0.0320544	0.0387774	0.0266825	0.0173416	0.0222348	0.0422744	0	0.120735	0.0681402	0	0
MIB2	0.0736291	0.0720798	0.0164182	0.0288054	0.562387	0.220602	0.097588	0.0607373	0	0.162726	0.0741037	0.153501
MMP23B	0	0.0155212	0	0	0.409106	0.008837	0	0	0	0.0518853	0	0.0407356
CDK11B	0.181742	0.181315	0.207982	0.187453	0.190902	0.229074	0.310692	0.0944309	0.350936	0.354005	0.237856	0.45058
RP11-345P4.10	0.00252451	0.00819555	0	0	0.00993759	0	0	0	0	0	0	0
SLC35E2B	0.124086	0.129902	0.128379	0.0656659	0.300256	0.175049	0.256176	0.0278457	0.215659	0.316258	0.473647	0.192106
CDK11A	0.370295	0.269997	0.379384	0.230261	0.433336	0.32856	0.467525	0.135542	0.364592	0.504331	0.413001	0.520505
SLC35E2	0.00307425	0.0043746	0.0152954	0	0.04905	0	0	0	0	0	0	0.0350192
NADK	0.229232	0.271293	0.239148	0.302336	1.07457	0.196149	0.461213	0.457972	0.670483	0.282503	0.332816	0.34726
GNB1	0.804611	0.701567	0.682823	0.880101	0.999333	0.766533	0.781675	0.508669	0.677152	1.0119	0.259821	1.05159
C1orf222	0.00494481	0.0160684	0	0.0247419	0.0120123	0.015498	0	0.0510428	0	0	0	0
PRKCZ	0.00800043	0.0249817	0	0.0626371	0.0480447	0.0554346	0.0346854	0	0.0369129	0.0624505	0.232566	0
RP5-892K4.1	0.00283098	0	0	0	0	0	0.0742397	0	0.0574732	0	0	0
RP11-181G12.2	0	0	0	0	0.0121051	0	0	0	0	0.0303832	0	0
C1orf86	0.614784	0.861666	0.73154	0.911626	1.01406	0.631386	1.23475	0.698686	0.927152	1.07417	0.561211	1.31919
AL590822.2	0.00451397	0.015781	0	0	0.0122305	0	0	0	0	0	0	0
AL590822.1	0	0	0.010262	0	0	0	0	0	0	0.0235702	0	0
SKI	0.227724	0.109199	0.27528	0.0998387	0.242809	0.0981422	0.0765862	0.00575353	0	0.348874	0.243019	0.0823287
MORN1	0.00714938	0.0044609	0	0	0.0381746	0	0	0.0300971	0.0793974	0	0	0
RER1	0.946444	0.874798	0.726939	1.24893	0.888127	0.753277	0.666126	1.01681	0.802507	0.920621	0.746329	1.33849
PEX10	0.117341	0.123033	0.0227517	0.0656325	0.0863821	0.0408375	0.107952	0.074963	0.0588253	0.0323328	0.143482	0.0805877
PLCH2	0	0	0.0135495	0	0	0	0.0360836	0	0	0	0	0.0690401
PANK4	0.0410418	0.0656664	0.0139493	0.0676775	0.0673119	0.0925229	0.0797256	0.0616102	0.0315613	0.0347745	0.324738	0.090321
RP3-395M20.12	0.100972	0.0451497	0.0690359	0.0923059	0.0562411	0.0509205	0	0.227051	0.521781	0.0978403	0	0.046793
TNFRSF14	0.745747	0.397812	0.840186	0.591789	0.402601	0.761221	0.595317	1.43798	0.97684	0.318802	0.413942	0.844165
FAM213B	0.0715532	0.090355	0.00846548	0.054978	0	0.0116235	0.0297051	0.446388	0	0.0141978	0.194986	0
MMEL1	0.00912787	0.0305872	0.0332531	0.0116523	0	0.015498	0	0.238949	0.0699146	0.0172267	0	0
LINC00982	0.00314089	0.0157217	0	0.00299944	0	0	0	0	0	0	0	0
PRDM16	0	0.0156063	0	0.00299944	0	0	0	0	0	0	0	0
ARHGEF16	0	0	0	0	0	0	0	0	0	0	0	0.130779
MEGF6	0.015768	0	0.0262108	0	0	0	0	0	0	0	0	0
TPRG1L	0.0564767	0.0546116	0.0661579	0.0221722	0.133458	0.0268226	0.0330954	0.0149359	0	0.0434733	0.102709	0.0820605
WRAP73	0.0655502	0.115976	0.0770279	0.0816397	0.215972	0.111753	0.105246	0.065312	0.128242	0.0781479	0	0.0988392
TP73	0.00220144	0.00672375	0	0.00551925	0	0.0155344	0	0	0	0	0	0
TP73-AS1	0.0376107	0.0268111	0	0.0054813	0.0181287	0.0210918	0.0323389	0.0300971	0	0.00935483	0	0.0211942
SMIM1	0.0234959	0.217245	0.0294033	0.0778999	0	0	0	0.0523199	0.0305968	0.0131691	0.287314	0.128874
LRRC47	0.0680679	0.16405	0.124101	0.0700613	0.22758	0.114152	0.240588	0.142576	0.1868	0.0817597	0.280102	0.179479
CEP104	0.101418	0.169212	0.0916421	0.0971467	0.230567	0.088501	0.203345	0.124232	0.177153	0.132591	0.076067	0.275781
DFFB	0.0205279	0.00585247	0.0105129	0.00623779	0.0114697	0	0	0.0366349	0	0	0	0.0137926
C1orf174	0.125013	0.182433	0.188861	0.264893	0.143058	0.143538	0.162901	0.173554	0.187623	0.0676963	0.138074	0.107649
AJAP1	0.00563255	0	0.0163594	0	0.0690987	0	0	0	0	0.0780194	0	0
NPHP4	0.0274488	0.0360161	0.0493355	0.0147892	0.0513534	0.0200246	0.10594	0	0	0.0819283	0	0.0137926
KCNAB2	0.2382	0.160031	0.402052	0.221434	0.196724	0.084667	0.210155	0.519438	0.591928	0.246633	0.204583	0.726226
CHD5	0.00292254	0	0	0	0	0	0	0.00856816	0	0.0141978	0	0
RPL22	10.0527	12.986	13.6741	10.0372	15.2466	15.1328	15.0624	8.62551	10.5855	12.3615	12.366	9.17456
RNF207	0.00880999	0.00459801	0.0159809	0.0254593	0.0167923	0.110448	0	0	0.09806	0.0570378	0.39074	0.053886
ICMT	0.0950748	0.142596	0.0844317	0.168039	0.0527938	0.0716641	0.0625259	0.059889	0.0550586	0.258556	0.14042	0.179442
GPR153	0.00397253	0.0113472	0.0133515	0.00885502	0.141953	0.0945122	0	0.0331484	0.0347991	0.031232	0	0
ACOT7	0.0495911	0.448354	0.020197	0.275491	0.165399	0.224063	0.00511051	0.258507	0.0383065	0.104841	0.250205	0.307845
RP1-202O8.3	0.00563659	0.0193194	0	0	0	0	0.0422744	0	0.0305968	0.0179094	0	0
HES2	0.00733191	0.0141439	0.0149615	0	0	0	0.0453213	0.475166	0	0	0	0
ESPN	0.00748128	0.0249969	0.0398107	0.0402182	0.00914119	0.0351077	0	0	0	0.0162549	0.121505	0
TNFRSF25	0.0253161	0.00429344	0.0247406	0.00622288	0	0.0407498	0	0.0263888	0.0600737	0.0361639	4.00643	0.0407356
PLEKHG5	0.0409247	0.0142323	0	0	0.00902234	0	0	0	0	0.0580971	0	0.0211942
NOL9	0.0512689	0.0583251	0.0226912	0.084711	0.0398163	0.0652574	0	0.050428	0.120347	0.0659935	0.0526319	0.0340209
ZBTB48	0.0716499	0.127966	0.0245305	0.0543073	0.0651352	0.110949	0.103849	0.0659307	0.0942619	0.0874183	0.0791221	0.0340209
KLHL21	0.0398326	0.0206375	0.035621	0.00982957	0.0952638	0.0270667	0	0.0184105	0.068494	0.24364	0.148782	0.167915
PHF13	0.0123056	0.0641915	0	0.0550273	0.0463217	0.0202116	0.0281945	0	0	0.137125	0	0.0137926
THAP3	0.0451782	0.0632958	0.0179456	0.0969463	0.103354	0.0437404	0.00511051	0.123977	0.0297984	0.0268289	0.280211	0.0567299
DNAJC11	0.0676638	0.0791506	0.0498629	0.0126348	0.0742522	0.0318039	0.0928663	0.0540411	0.168863	0.0399696	0	0
RP11-312B8.1	0.00766571	0.00290945	0	0	0	0	0	0	0.0297283	0	0	0
CAMTA1	0.979322	1.14011	1.17655	1.20762	0.720149	1.25328	1.07572	1.19926	0.735101	1.22986	1.32085	0.745351
VAMP3	1.07864	0.437417	1.06967	0.848006	0.446567	0.242627	0.586403	0.545842	0.729517	0.805724	0.210412	0.238104
PER3	0.158859	0.0519034	0.0149298	0.0116163	0.0793461	0	0.0411941	0.227224	0.0347991	0.249015	0.130835	0
UTS2	0.0378151	0.542508	0	0.261143	0	0.0325228	0.251006	0.158203	0.0225715	0	0.364761	0.344393
TNFRSF9	0.0577329	0.267268	0.0159341	0.228654	0.00670916	0.116236	0	0.0114158	0	0.0470638	0.0629667	0.10374
PARK7	2.29219	3.06437	2.06851	3.06962	7.62603	2.63132	2.12165	3.16945	2.50204	3.11547	2.73998	3.03013
ERRFI1	0.52105	0.109149	0.602502	0.188633	0.297896	0.295697	0.00511051	0.132671	0.177388	4.62311	0.412876	0.22032
RP11-431K24.4	0.010645	0	0.0140037	0	0	0	0	0	0	0	0	0
SLC45A1	0	0.00500766	0	0.0114587	0.01055	0.0186583	0	0	0	0.0321072	0.0705871	0
RERE	0.436225	0.272324	0.19997	0.179606	0.504903	0.256901	0.187393	0.0461787	0.358975	0.680688	1.23931	0.211831
ENO1	4.78892	8.64216	5.65763	9.51832	1.97905	6.19972	3.46928	3.93346	4.53584	3.27816	7.00967	4.91646
ENO1-AS1	0.0368591	0.0188121	0	0.0189478	0.0173325	0	0	0	0.0315613	0	0	0
SLC2A5	0.169857	0.0898972	0.00299373	0.569111	0	0	0	0.26396	0	0.010574	0	0.0211942
GPR157	0.042134	0.0988699	0.0192832	0.0329277	0.0537073	1.54164	0	0.0628991	0.0611277	0.10177	0	0.0896257
RP3-510D11.1	0	0	0	0	0	0.0196473	0	0.00575353	0.0370332	0	0	0
RP3-510D11.2	0	0	0	0.0429027	0	0.0101717	0	0	0	0	0	0
H6PD	0.0461911	0.0677613	0.0532781	0.0446529	0.112536	0.188359	0.1036	0.0630602	0.0565001	0.147112	0.0699868	0.103029
SPSB1	0.0573211	0.0396475	0.0966231	0.089829	0.0312388	0.0227554	0	0.609268	0.0294586	0.290744	0.13532	0.0646822
SLC25A33	0.404505	0.312146	0.221446	0.362442	0.136301	0.79671	0.123356	0.239722	0.116819	0.320943	0.122146	0.394804
TMEM201	0.0189975	0.00828602	0.0273745	0.0400771	0.0358019	0.0153267	0	0	0	0.0257742	0.0741037	0
PIK3CD	0.0899205	0.139719	0.0536843	0.091385	0.153555	0.063157	0.307041	0.203754	0.27522	0.0677816	0.689641	0.236024
C1orf200	0.0151362	0.0043746	0	0.0126202	0	0	0.0270655	0	0	0.017135	0	0
RP11-558F24.4	0.00660708	0.0399204	0	0	0	0.0138472	0	0	0	0.132521	0	0
CLSTN1	0.311998	0.242346	0.138315	0.22874	0.214892	0.294558	0.181722	0.149691	0.209772	0.695635	0.119956	0.23827
CTNNBIP1	0.237633	0.318576	0.327933	0.230872	0.15555	0.51913	0.270009	0.334492	0.0837503	0.307098	0.337884	0.290567
LZIC	0.266476	0.311668	0.172709	0.407866	0.353477	0.228307	0.261677	0.1382	0.164904	0.349571	0.367511	0.562796
NMNAT1	0.0352627	0.0184942	0.1044	0.013549	0.0200547	0	0.137883	0	0.0613597	0	0	0.0211942
RBP7	0.114669	0.0332109	1.00993	0.00311582	0.0870457	0.0138472	1.55769	0.0611474	0.870005	1.11753	0.0608761	1.08012
UBE4B	0.105836	0.113215	0.114823	0.0843175	0.121369	0.163708	0.110104	0.0700127	0	0.22248	0.0699868	0.159245
KIF1B	0.74988	0.116769	0.2545	0.195796	0.134719	0.134664	0.169081	0.201558	0.216695	0.488713	0.122619	0.206827
PGD	0.399064	0.357977	1.20901	0.500419	0.670612	0.256286	0.847537	0.848738	0.549734	0.58073	0.0791221	0.585618
APITD1	0.0337397	0.064342	0.0262061	0.167809	0.11724	0.0229363	0	0.021972	0.0389299	0.0391753	0	0.0340209
APITD1-CORT	0	0	0	0.00636607	0.00683681	0	0	0	0	0	0	0
DFFA	0.223814	0.151431	0.109546	0.304673	1.12311	0.11809	0.0946902	0.215468	0.158452	0.345073	0.126105	0.163389
PEX14	0.0398815	0.0559701	0.0101857	0.0359058	0.104844	0.0726279	0.0987105	0.167999	0	0.0704434	0.084156	0.0576476
CASZ1	0.0124588	0.00735789	0.0146712	0.0554168	0.10694	0.0228192	0.0339931	0.0710544	0	0.0927645	0	0
C1orf127	0.00325989	0	0	0.00956916	0.0123501	0	0	0.00856816	0	0	0	0
TARDBP	0.595956	0.606322	0.556543	0.522338	0.910562	0.439696	0.494581	0.510777	0.380071	0.829739	0.975267	0.382476
RP4-635E18.8	0.0176123	0	0.0331151	0.0167742	0.0796077	0.0111876	0	0.0343484	0.100252	0.0231673	0.0963753	0.0966454
SRM	0.389969	0.923276	0.456619	0.594758	0.768063	0.521666	0.279599	0.837855	0.341793	0.766242	0.306391	0.259813
EXOSC10	0.126316	0.147296	0.178634	0.110443	0.23942	0.183356	0.0698198	0.0418078	0.191461	0.184902	0.300576	0.158422
RP4-635E18.6	0.0137833	0	0	0.00680816	0	0.00559382	0	0.027096	0	0	0	0
MTOR	0.0518644	0.0194479	0.0857795	0.0595221	0.0635773	0.0525301	0.0306657	0.021972	0.0637913	0.120594	0.197995	0.0693313
UBIAD1	0.0669515	0.02802	0.013968	0.0593423	0.107924	0.016424	0.0688716	0.021972	0.0627197	0.0719256	0.10587	0.0823956
FBXO2	0	0.00823311	0	0.0186285	0	0.0260002	0	0	0	0.0551318	0	0.129364
FBXO44	0.0455503	0.0753764	0	0.0499645	0.0331087	0.0112927	0.0588871	0.0305784	0.0234471	0.0372447	0.0791221	0.126709
FBXO6	0.157579	0.21406	0.205755	0.202494	0.291619	0.134341	0.186107	0.288558	0.27449	0.116376	0	0.245356
MAD2L2	0.267236	0.379441	0.236647	0.628543	0.470943	0.304608	0.301438	0.279672	0.339162	0.561532	0.0524753	0.502487
DRAXIN	0	0.00371742	0	0	0	0	0	0	0.0278214	0.0286972	0	0.032317
AGTRAP	0.264083	0.43334	1.39298	0.488429	0.0757498	0.0681256	1.71729	1.08865	1.26494	0.603184	0	0.68386
C1orf167	0.0142196	0.00583218	0	0.0143284	0	0	0	0	0	0	0	0
MTHFR	0.235771	0.157652	0.149133	0.145278	0.153075	0.33328	0.292347	0.063093	0.211327	0.127094	0.0608761	0.111351
CLCN6	0.0929392	0.0565285	0.109461	0.0307184	0.00965372	0.0497932	0	0.0333218	0.0386518	0.027367	0	0.141507
NPPA-AS1	0.0130106	0	0	0	0.00971874	0.00988296	0	0	0	0	0	0
KIAA2013	0.263633	0.145831	0.163266	0.128129	0.28546	0.0978139	0.200483	0.239645	0.331525	0.274128	0.262351	0.494171
PLOD1	0.174945	0.187756	0.173995	0.383658	0.132622	0.0607007	0.157852	0.0892982	0.0952864	0.716633	0	0.0253306
MFN2	0.105414	0.127825	0.072558	0.0892061	0.0748599	0.0846423	0.14693	0.108766	0.190486	0.15927	0	0
MIIP	0.187695	0.245459	0.150672	0.239045	0.450213	0.285681	0.34015	0.207254	0.324633	0.342961	0.0676599	0.201217
TNFRSF8	0.0381605	0.00990963	0.0443503	0.0236073	0	0.0101717	0.0265776	0	0.303749	0	0	0
TNFRSF1B	2.17941	0.732768	2.35535	1.28017	2.17311	0.635557	1.02477	0.882733	3.1035	1.46023	0.900246	1.80257
VPS13D	0.167818	0.0697443	0.20014	0.0596606	0.220473	0.09313	0.268468	0.0224038	0.116863	0.336646	0.060086	0.243289
DHRS3	0.605855	0.441127	0.38553	1.00105	0.035929	0.198806	0.0672668	0.694158	0.0431749	0.117856	1.3227	0.531312
RP11-474O21.5	0	0	0.00730142	0.0076946	0	0	0	0	0	0	0	0
C1orf158	0.00315175	0	0	0.0361135	0	0.0143245	0	0	0	0.0131691	0	0
PDPN	0.0445988	0.0637286	0.0908197	0.022213	0.0855159	0.00946569	0	0.0645686	0.0556296	0.643041	0	0.216432
PRDM2	0.295622	0.210883	0.342468	0.209191	0.415091	0.566901	0.393329	0.14893	0.240354	0.781994	0.505722	0.488463
KAZN	0.00891333	0	0.0248864	0.11636	0.0190838	0.00974402	0	0.021972	0	0.0448982	0	0
TMEM51	0.557766	0.343584	0.129361	0.600134	0.0301405	0.0410838	0.0153315	0.293224	0.0412923	0.0680878	0	0.134492
FHAD1	0.0601368	0.0347682	0.0138054	0.0377449	0.0157119	0.0247008	0.0567707	0.0149359	0.0305968	0.0404423	0	0
RP3-467K16.2	0.00821273	0	0	0.0315528	0	0.00930805	0	0	0	0	0	0
EFHD2	1.733	1.6952	3.03902	1.55948	0.512196	1.43984	2.09556	0.895321	2.20294	0.972504	0.670846	1.42208
CASP9	0.142227	0.139672	0.150899	0.0924136	0.114809	0.123015	0	0.0964969	0.0974072	0.131456	0.084156	0.0211942
DNAJC16	0.0841892	0.06555	0.0834013	0.0541358	0.0688038	0.0617336	0.0305909	0.134836	0.168912	0.0632349	0.0714725	0.087561
AGMAT	0.00912993	0	0	0.00380872	0.00683681	0	0	0	0	0	0	0.032317
RP4-680D5.2	0.0105739	0	0	0.00673277	0.0120123	0	0	0	0	0	0	0
DDI2	0.125776	0.0983487	0.0485749	0.0926533	0.169864	0.0657334	0.0618771	0.173534	0.0699146	0.126959	0	0.026943
PLEKHM2	0.204805	0.139298	0.0925553	0.10673	0.124724	0.0940679	0.0327006	0.21917	0.0306463	0.0866905	0.141063	0.149084
FBLIM1	0.074253	0.0318294	0.045723	0.0315759	0.0459249	0.0617872	0.0422744	0.0418598	0	0.764129	0	0.10514
RP11-169K16.9	0.0900084	0.109606	0.0882725	0.153527	0.112952	0.0580837	0.162629	0.170977	0.090563	0.0915148	0.0707489	0.0214317
SPEN	0.429975	0.443954	0.320196	0.232381	0.567124	0.475752	0.419692	0.121986	0.354699	0.60177	0.596567	0.279747
ZBTB17	0.0886681	0.0725537	0.155245	0.0292364	0.133573	0.0879052	0.158379	0.0518902	0.105968	0.0248382	0.220254	0.09919
C1orf64	0.0128729	0	0	0.0156087	0	0	0	0	0	0.0518853	0	0
EPHA2	0.0396081	0.0453075	0.0294792	0.0755621	0.299964	0.0434235	0.0519972	0.101691	0	0.107585	0	0.032317
ARHGEF19	0.014089	0.0315415	0.0107684	0.00754953	0.00807937	0.00930805	0.0336089	0.0278457	0.0278214	0.0233824	0	0
RSG1	0.00283098	0.00402225	0	0.0170199	0	0.00767702	0	0.0518339	0	0	0	0
FBXO42	0.108192	0.092174	0.0787607	0.122866	0.0687075	0.11954	0.246565	0.0826072	0.161438	0.0794358	0.0791221	0.203429
SZRD1	0.397356	0.387057	0.359704	0.360673	0.260272	0.194625	0.342515	0.285916	0.295231	0.35415	0.439426	0.244522
NECAP2	0.705423	0.618036	0.374117	0.907908	0.802035	0.595402	0.537007	0.757483	1.02584	0.431926	0.530351	0.518696
RP4-798A10.2	0.0190409	0.0211103	0	0	0.0104541	0.0245755	0	0.0388268	0	0	0.065229	0
RP4-798A10.7	0	0.0317699	0	0	0.00804861	0	0	0	0	0	0	0.026943
NBPF1	0.130847	0.0334164	0.0658305	0.0481799	0.0645274	0.103509	0.0828981	0.205355	0.0687094	0.21604	0.134605	0.0255989
CROCCP2	0.0344216	0.0827247	0.0800564	0.0668111	0.13529	0.0173512	0.104971	0.0567963	0.0383065	0.0659545	0	0.0757548
CROCC	0.054026	0.0111058	0.0331199	0.0149815	0.0574605	0.0329777	0.0331016	0.00856816	0.0274583	0.0554634	0.0963753	0.0211942
RP11-108M9.4	0.158261	0.172527	0.286885	0.229637	0.0435142	0.0486207	0.324643	0.186009	0.234338	0.0409571	0	0.0994685
RP11-108M9.6	0.0186625	0.00813681	0	0.0197265	0.0229613	0.0101717	0	0	0	0	0	0.0214317
MFAP2	0.0661005	0.0181307	0.0418814	0.00376113	0.0738132	0.0458843	0	0	0.0275382	0.7197	0.114992	0.0620633
ATP13A2	0.0535466	0.0672329	0.00598746	0.102015	0.635398	0	0.010221	0.0642601	0	0.139167	0	0.0714402
SDHB	0.733462	0.699736	0.741341	0.874251	0.560788	0.399108	0.589839	1.38597	0.777312	0.412246	0.428462	0.68327
PADI2	0.142012	0.172237	0.144945	0.272381	0	0.199966	0.0305909	0.0802876	0	0.0344985	0	0
PADI4	0	0.0712281	0.141292	0	0.0827899	0.00799165	0.0751223	0	0	0.126617	0	0.17084
RCC2	0.358731	0.277033	0.235166	0.44761	0.283381	0.1518	0.51625	0.206123	0.350785	0.302995	0.245075	0.298246
ARHGEF10L	0.106714	0.0543908	0.0691818	0.120983	0	0	0.0474158	0.0281627	0.0285124	0.0718415	0	0
IGSF21	0.267777	0	0.00299373	0.0254111	0	0	0.0153315	0	0	0.125337	0	0.0350192
ALDH4A1	0.018553	0	0.0174051	0.0139425	0.0173555	0.0183378	0	0.0217326	0.0507275	0	0	0
IFFO2	0.0154624	0.0141439	0	0.00311582	0.0357007	0.0901683	0.0305909	0.0410405	0	0.0435191	0	0
UBR4	0.211287	0.1287	0.295699	0.0986575	0.313654	0.147016	0.298237	0.209046	0.236397	0.301662	0.287259	0.177782
RP1-43E13.2	0.0203621	0.0180043	0.0545175	0.0114929	0.0268268	0	0.0603977	0	0	0.00854745	0	0.0997661
EMC1	0.0702904	0.0792061	0.0683431	0.032735	0.0959515	0.0603229	0.0444824	0.128673	0.0649092	0.0336751	0.151934	0.18234
MRTO4	0.14712	0.166772	0.132105	0.208271	0.176436	0.0946025	0.165031	0.401681	0.18409	0.264541	0.084156	0.342744
AKR7A2	0.410514	0.367203	0.329531	0.466026	0.629785	0.598622	0.277303	0.747732	0.307274	0.443433	1.16652	0.437015
PQLC2	0.0632809	0.0524463	0.0301394	0.0731462	0.0607786	0.113437	0.155347	0.0994293	0	0.0228135	0.0585381	0.250452
CAPZB	4.47991	3.0376	2.50079	5.04172	1.50734	3.20742	2.36676	1.87737	3.86749	2.28317	2.7834	4.01066
MINOS1-NBL1	0.00265809	0.015654	0	0.00214858	0	0.00924893	0	0	0	0	0	0
MINOS1	2.23733	2.5056	2.4833	3.45244	1.94364	1.71326	2.50078	1.82449	3.71582	2.54812	2.35686	2.70622
NBL1	0.138011	0.0665777	0.0729782	0.128125	0.0881201	0.0886181	0	0.120485	0.104303	1.01466	1.1448	0.524068
TMCO4	0.0965723	0.0635962	0.021713	0.105499	0.0316611	0.00988296	0	0.0484966	0.0950739	0.0582407	0	0.0978407
OTUD3	0.0405252	0.0539897	0.019711	0.0183748	0.040979	0.0260448	0	0.0859378	0	0.0603266	0.135156	0
PLA2G2D	0.0128566	0.0378228	0	0.0625222	0	0	0	0.397923	0	0	0	0
RP3-340N1.2	0.0254869	0	0	0.0260099	0	0	0	0	0	0.00850602	0	0
UBXN10-AS1	0	0.0559842	0.0375177	0	0	0.00924893	0	0.0366349	0	0	0.0705871	0
UBXN10	0.0167078	0.0396178	0	0.0416037	0.00885105	0	0.05326	0.0184105	0	0.0518853	0	0
CAMK2N1	0	0.0270179	0.0383966	0.0833983	0.0417282	0.0355343	0	0.0689714	0	0.0879294	0	0
MUL1	0.0555919	0.0860366	0.0243872	0.0960566	0.0442347	0.0423459	0.118097	0.254484	0.0664732	0.0437888	0.0473317	0.097486
FAM43B	0.0075967	0	0.00299373	0	0	0.00974402	0	0	0	0	0	0
CDA	0.0257151	0.0419142	0.717952	0.0449495	0	0	1.50929	0.396556	0.599822	0.165709	0	0.321601
PINK1	0.131344	0.105206	0.145448	0.177058	0.0939848	0.0472849	0.136706	0.348133	0.144083	0.130681	0.202936	0.0852777
PINK1-AS	0	0	0.013423	0.00494535	0	0	0	0	0	0	0	0
DDOST	0.858615	0.955699	0.516096	1.10718	0.867695	0.923734	0.475992	0.453121	0.586804	0.858065	1.27081	0.706019
KIF17	0.0270784	0.0526662	0.0163351	0.0337569	0.00777134	0	0.00511051	0.0709386	0	0.0138048	0	0
HP1BP3	1.1596	0.862044	1.15839	0.886979	1.57869	1.04066	0.880766	0.709122	0.912568	1.77141	1.52509	1.36879
EIF4G3	0.473319	0.461672	0.568534	0.181444	0.724989	0.476237	0.279441	0.162076	0.115724	0.639167	0.166408	0.43852
ECE1	0.0267916	0.126645	0.141108	0.0390852	0.130994	0.239596	0.309911	0.0248164	0.204155	0.343114	0.0524753	0.229856
NBPF3	0	0.00669243	0	0.00635698	0	0	0	0	0.0306463	0	0	0
ALPL	0.00332486	0.00522624	0	0.00421749	0.00953325	0	0	0	0	0	0	0.0137926
USP48	0.367588	0.557902	0.45111	0.202663	0.387333	0.320355	0.652178	0.273384	0.264221	0.492839	0.553166	0.746441
LDLRAD2	0.00566451	0	0.0192803	0.00279669	0.019584	0	0	0	0	0	0	0
HSPG2	0.0964553	0.0836857	0.0906673	0.0385163	0.14227	0.0837228	0.0628783	0.0395455	0.145361	0.394359	0.0629667	0.05926
LINC00339	0.0317505	0.0353054	0.0329608	0.0172763	0.00563184	0.008837	0.0773542	0	0	0	0	0.0600876
CDC42	5.03182	5.84569	7.09677	5.78115	2.94415	4.41318	5.82906	5.85093	7.94592	4.50253	6.19014	6.41559
WNT4	0.0369907	0.00402225	0.032739	0	0.0360371	0	0	0	0	0.339279	0	0
ZBTB40	0.0583128	0.0659873	0.0388917	0.0204882	0.0450278	0.0105827	0.0433164	0	0.0285124	0.0411238	0	0.0393915
C1QA	42.4637	6.8103	1.42515	27.729	0.0231572	0.0465881	0.853455	3.40122	2.33434	6.67639	0.183495	9.20841
C1QC	34.7717	6.57546	0.710661	31.2885	0.0625483	0.0674701	0.942106	2.9428	0.0924155	4.76153	0	9.0567
C1QB	45.6117	7.34193	1.13296	38.6652	0.0984535	0.0765658	1.34188	3.58432	0.82006	6.45837	0.112718	10.058
EPHB2	0.068993	0.0156068	0	0.0516002	0.00906643	0.00559382	0.0891031	0	0	0.0227721	0	0.0349868
KDM1A	0.147302	0.208502	0.277016	0.118867	0.317894	0.15707	0.124299	0.182702	0.186669	0.415935	0.592357	0.107397
LUZP1	0.315725	0.227689	0.182813	0.217664	0.186789	0.413266	0.116992	0.214351	0.0532924	0.38625	1.85381	0.366132
RP5-1057J7.6	0.00438005	0.023303	0	0	0.0206479	0.0227446	0	0	0.0351815	0	0	0
HNRNPR	1.11728	1.00299	1.18832	1.08539	0.979806	1.10971	0.615643	0.825204	1.28881	1.82648	1.35013	1.40428
ZNF436	0.0139369	0	0	0.0417848	0.00848112	0	0	0	0	0.0811186	0	0.0632139
C1orf213	0.00505937	0.00371301	0	0	0.00867867	0.0721832	0	0.0526949	0	0.0131691	0.0676599	0
TCEA3	0.0052661	0	0.0353031	0.0251566	0.00769438	0.102533	0	0	0.0225715	0.0893046	0.0791221	0
E2F2	0.00220144	0	0	0.0338288	0	0	0.00511051	0	0	0	0	0
ID3	0.72612	0.316989	0.449082	1.28174	0.178334	0.306965	0.260783	0.633371	0.197443	1.85907	0.279815	0.0749428
RPL11	26.0486	35.4372	35.3086	27.0954	38.1253	37.8592	39.1387	28.5663	33.2367	33.6094	35.2703	27.3205
TCEB3	0.175851	0.26875	0.202127	0.152944	0.30938	0.260045	0.127123	0.335348	0.21348	0.184446	0.494072	0.223464
RP5-886K2.3	0.0414861	0.0228399	0	0.0215124	0.0586722	0.0317841	0	0	0	0.0405204	0	0
PITHD1	0.281239	0.218811	0.151651	0.415128	0.378487	0.256261	0.119462	0.524797	0.368979	0.240133	0.588739	0.257949
LYPLA2	0.165863	0.174622	0.149784	0.297706	0.171513	0.204519	0.510774	0.343818	0.226995	0.255416	0.459088	0.449492
GALE	0.109548	0.0675524	0.0635564	0.125243	0.0499037	0.0485267	0.0704421	0.216158	0.223633	0.0367394	0.250745	0.0253306
HMGCL	0.186754	0.154785	0.0808327	0.284131	0.176564	0.1406	0.171897	0.360933	0.140315	0.0681437	0.0696709	0.134654
FUCA1	0.41381	0.145925	0.167825	0.374487	0.121803	1.40283	0.0459972	1.70015	0.114872	0.179318	1.1836	0.305324
PNRC2	0.129972	0.0817428	0.12874	0.0502674	0.15533	0.154845	0.0752987	0	0.0944283	0.262625	0.204568	0.0419662
SRSF10	0.300382	0.332023	0.245578	0.250382	0.758878	0.168129	0.198788	0.143918	0.283834	0.566857	0.796658	0.434298
IFNLR1	0.0722772	0.05658	0.00476735	0.0606487	0.318388	0.0130944	0	0.0487509	0	0.0558217	0	0.0858764
STPG1	0.0100127	0.0334526	0.0137516	0.0458525	0.0231145	0.0107826	0.0314068	0.0372598	0.0386518	0.0609438	0.0590797	0.0255989
NIPAL3	0.0698363	0.133672	0	0.0316321	0.216578	0.107438	0.00511051	0.00856816	0.0698047	0	0	0.20779
RCAN3	0.209367	0.175322	0.130451	0.105903	0.349475	0.188106	0.138192	0.108424	0.154539	0.115269	0.29907	0.429582
RP4-594I10.3	0.0101378	0.0234736	0.0667987	0.0124131	0.0523108	0.0229002	0.023084	0.0366349	0.0631735	0.0188184	0.084156	0.0214317
NCMAP	0	0.00573279	0	0	0.101926	0	0	0	0	0.0218771	0	0
SRRM1	2.09781	1.94088	1.81072	2.12068	2.17462	2.09953	1.83978	1.86791	2.28527	2.26911	2.77301	1.74601
CLIC4	0.251386	0.483892	0.211956	0.343997	0.138169	0.453218	0.28928	0.193738	0.220616	0.878492	0	0.578605
RUNX3	0.701688	1.27718	0.188746	0.927618	0.181543	0.385642	0.133703	0.182659	0.44593	0.183963	0.923195	1.76083
SYF2	0.908509	1.35718	1.69287	1.15925	1.2787	1.3917	2.26197	1.77846	2.13091	0.82572	1.21744	1.14168
C1orf63	2.17252	1.58452	2.49189	0.777325	2.71293	1.73468	1.93871	0.811896	2.50544	2.63307	3.51686	3.36741
RP3-465N24.6	0.00594998	0	0	0.00237324	0	0	0	0.0346717	0	0.010574	0	0
TMEM50A	1.79101	1.55139	1.8052	2.33063	2.07743	1.15531	1.73986	2.14745	1.68309	1.4628	1.96044	1.83206
RHCE	0	0.00312854	0	0	0.00769438	0.0107826	0	0	0	0	0	0
TMEM57	0.190771	0.196127	0.156285	0.153903	0.267884	0.237941	0.116509	0.229046	0.18761	0.239653	0.315839	0.494957
LDLRAP1	0.0179857	0.0346881	0.00846548	0.0259107	0.00948749	0.0382525	0.00511051	0.0709512	0.0315613	0.017135	0.139342	0.0789617
MAN1C1	0.069247	0.0105426	0	0.0120278	0.00683681	0.0299062	0.0844442	0.11901	0.027264	0.129234	0.0473317	0.0253306
RP1-187B23.1	0.0183079	0.00334654	0.0538962	0.0131759	0.00602526	0	0.0323389	0.0149359	0	0.0803273	0	0.0350192
SEPN1	0.12307	0.0782048	0.0814046	0.154496	0.0369975	0.0980813	0.0812141	0.0748058	0.0550084	0.209851	0.0473317	0.0255989
MTFR1L	0.0895195	0.169521	0.0554085	0.152982	0.154876	0.0882704	0.165054	0.281117	0.311838	0.15955	0.198363	0.0211942
AUNIP	0	0.00346682	0	0.0550519	0	0	0	0	0	0	0	0.032317
RP1-125I3.2	0.00427931	0	0.0313046	0	0	0	0	0	0	0	0	0
PAQR7	0.03806	0.108295	0.0546128	0.0187689	0	0.03646	0.126604	0	0.137028	0.108759	0.0714725	0.214566
STMN1	1.37655	1.26276	0.405801	6.71065	4.73319	1.46647	0.347364	0.308926	0.161641	3.72388	0.620515	1.73366
PAFAH2	0.0353448	0.021712	0	0.0362019	0.229083	0.00891893	0	0.0560077	0.0628246	0	0.0705871	0.0137926
SLC30A2	0	0.0621869	0	0	0	0.0105827	0	0	0	0	0	0
PDIK1L	0.0288979	0.0260339	0.0131849	0.042187	0.0185631	0	0.0369734	0.0919793	0	0.011324	0.237561	0.0916809
ZNF593	0.243024	0.434435	0.322131	0.380255	0.216548	0.253128	0.579217	0.632708	0.263443	0.336916	0.292625	0.130515
CNKSR1	0.00704763	0.0320396	0	0.0167621	0	0	0	0.0263888	0.0498624	0	0	0.153451
CEP85	0.0209832	0.041805	0	0.0628705	0.0116805	0.00467954	0.00511051	0.0593018	0.0769584	0.010574	0	0.136878
SH3BGRL3	6.75213	10.4757	15.5033	7.65423	4.43468	5.44827	17.4831	8.1084	13.1972	6.59864	4.78024	12.8531
UBXN11	0.0835637	0.167996	0.634685	0.26555	0.062888	0.0527405	0.522341	0.393497	0.671148	0.21001	0.292838	0.220248
CD52	1.06944	4.13347	8.62431	1.52711	1.0886	2.87044	10.7365	30.9127	21.6948	4.22499	22.9282	11.2166
AIM1L	0.00559447	0	0	0.0275337	0	0	0	0.0252604	0	0	0.0699868	0
ZNF683	0.0178541	0.0409501	0.0179238	0.0455441	0.0174751	0.0578652	0	0.0688861	0	0.126938	0	1.61781
DHDDS	0.119186	0.0804978	0.0580451	0.207987	0.0922495	0.0896569	0.05326	0.0832673	0.267625	0.155251	0.176318	0.194731
HMGN2	3.17804	4.48833	3.03303	11.0408	3.96803	3.66742	3.68101	2.67051	4.49171	5.23742	2.90011	5.00593
RPS6KA1	0.376872	0.476169	0.226663	0.345391	0.207305	0.261056	0.163112	0.612179	0.599367	0.113056	0.491242	0.506183
ARID1A	0.341101	0.262883	0.44253	0.259519	0.430695	0.173896	0.845106	0.111827	0.55795	0.523181	0.430374	0.43431
PIGV	0.0388669	0.0373502	0.0927038	0.0578239	0.0361272	0.0553535	0	0.0604033	0	0.0391467	0.149007	0.0509295
ZDHHC18	0.062749	0.0718941	0.0336335	0.0421407	0.0454385	0.201106	0.0747023	0.0263888	0.118159	0.0660138	0.0629667	0.0646339
SFN	0.0131771	0.199554	0	0.245025	0.00981422	0.0412831	0.11447	0.30806	0.0463444	0.0773297	0	0.128874
GPN2	0.0731197	0.105553	0.103489	0.165196	0.127111	0.0642564	0.0689663	0.137527	0	0.0859239	0.138409	0.05926
GPATCH3	0.0650174	0.0356479	0.166655	0.0550483	0.139838	0.0349362	0.0978011	0.0385665	0.0391242	0.0336348	0	0.0522736
NUDC	1.02294	0.932924	0.595866	1.26441	0.983435	0.615969	0.379151	1.00361	0.708564	1.13369	0.683934	0.702272
C1orf172	0.00506141	0	0	0	0	0	0	0	0.0314608	0	0	0
TRNP1	0	0.0239947	0.0166608	0.0601782	0	0.0207882	0	0.10894	0.145936	0	0	0.128874
FAM46B	0	0	0	0.0184998	0	0.00733504	0	0	0	0	0	0
SLC9A1	0.0222753	0.0703741	0.0346815	0.0567369	0.046423	0.0189585	0.0567071	0.147626	0.0370392	0.0835121	0.0791221	0.134425
WDTC1	0.072996	0.0960405	0.181318	0.0728211	0.169475	0.0410571	0.125842	0.150663	0.0916526	0.124009	0.157896	0.172566
TMEM222	0.0867799	0.102348	0.0447402	0.0754012	0.0818269	0.0784621	0.0669453	0.0502531	0.0278214	0.153213	0.0585381	0.183385
SYTL1	0.0145256	0.195663	0.127868	0.14863	0.0945686	0.144839	0.107974	0.0907343	0.603428	0.0927781	1.02655	0.38862
MAP3K6	0.0160023	0.00760621	0.0251163	0.040165	0	0.0541558	0.0297051	0.0519264	0.0917942	0.155322	0	0.0646822
CD164L2	0.00258012	0	0	0.0132876	0.0363434	0.0143245	0.0422744	0	0	0	0	0
GPR3	0.0164209	0.0040293	0	0	0	0	0	0	0	0.00935483	0	0
WASF2	1.29632	0.744674	0.994998	0.813924	1.49404	0.913866	0.936131	0.655297	1.52198	1.2948	1.0136	1.17056
AHDC1	0.0647094	0.0384456	0.0232485	0.0429319	0.0891005	0.023222	0.05326	0	0.0225715	0.0827767	0.0676599	0.0821581
FGR	0.47527	0.636864	2.04355	0.395928	0.036458	0.273784	1.65916	1.65156	3.34662	0.653869	0.223896	1.07185
IFI6	2.10838	1.61464	2.79444	6.20239	0.198898	0.240874	2.05563	9.69403	2.08886	1.6334	0.637304	2.02244
FAM76A	0.117875	0.154695	0.0365775	0.130278	0.290152	0.101192	0.0903656	0.0489804	0.138179	0.0812682	0.122462	0.313817
STX12	0.760513	0.423642	0.478859	0.719894	0.25737	0.694518	0.253173	0.4434	0.798043	0.45923	0.0741037	0.511135
PPP1R8	0.153587	0.17103	0.0914204	0.142509	0.230177	0.167406	0.0904096	0.261242	0.14435	0.149603	0.0806205	0.261971
THEMIS2	1.50411	1.01373	1.14668	0.874371	3.96593	1.07979	1.13693	0.828501	1.58294	0.729827	0.513129	0.602113
RPA2	0.396921	0.419594	0.25694	0.560064	0.826885	0.521249	0.178577	0.378566	0.179144	0.162374	0.757993	0.495338
SMPDL3B	0.00906763	0.0562644	0.0199725	0.0184224	0	0.0713363	0	0.0410405	0	0	0	0.026943
XKR8	0.0481655	0.0893696	0.0377553	0.0338997	0.0710019	0.0642776	0	0.0594598	0.0647343	0.0341058	0.112718	0.101226
EYA3	0.15884	0.125634	0.126794	0.0966968	0.0917484	0.0596511	0.136471	0.0569677	0.0698429	0.0927213	0.130673	0.129681
PTAFR	0.588571	0.612892	0.263516	0.509769	0.00914119	0	0.504849	0.128193	0.1351	0.116451	0	0.204481
DNAJC8	1.06951	1.21887	1.0272	1.44557	1.20308	0.91518	0.613507	0.959597	1.28147	1.2745	1.61388	1.16649
AL353354.2	0.0072059	0	0.0165508	0	0	0	0	0	0	0	0.084156	0
ATPIF1	1.5483	1.92391	1.0979	1.99699	1.70734	1.18475	1.45664	3.15873	1.12886	1.64958	2.9178	2.75225
RP5-1092A3.4	0.00944425	0.0165354	0	0	0.0113001	0.00982971	0	0	0	0.0622722	0	0
SESN2	0.233964	0.143847	0.121133	0.261458	0.00857714	0.201875	0.00511051	0	0.104487	0.110385	0.0791221	0.193395
MED18	0.037	0.0312319	0	0.0456578	0.00849459	0.0187599	0.0746203	0	0.0774308	0	0.0526319	0
PHACTR4	0.240241	0.172945	0.153181	0.310562	0.20296	0.152407	0.189686	0.50004	0.250778	0.317608	0.113933	0.148492
RCC1	0.103806	0.105136	0.0631391	0.169184	0.0338904	0.107548	0.129124	0.10644	0.153891	0.16706	0	0.107994
TRNAU1AP	0.258669	0.162077	0.167197	0.392466	0.224105	0.198646	0.191158	0.0602115	0.027264	0.143416	0.154913	0.235239
SNHG12	0.355486	0.343308	0.207322	0.764064	0.100507	0.180455	0.0649848	0.258374	0.12375	0.158812	0.450919	0.167867
TAF12	0.38587	0.375738	0.496403	0.568591	0.292774	0.437441	0.398424	0.468389	0.568727	0.433025	0.180306	0.478723
RAB42	0.239877	0.151348	0	0.881288	0	0.0116235	0	0.636531	0	0.0740141	0	0.032317
RP11-442N24__B.1	0.00584508	0.00843202	0	0	0.0184176	0	0	0	0	0	0	0
RNU11	0.056902	0.0180381	0.0716525	0.00687695	0.2741	0.008837	0.0985914	0.00856816	0	0	0.060086	0.0511978
GMEB1	0.132318	0.139301	0.119492	0.0749454	0.0638651	0.0792184	0.227323	0.105435	0.0609193	0.206271	0.218634	0.0391233
YTHDF2	0.492234	0.562717	0.355895	0.447277	0.695049	0.5028	0.343607	0.636063	0.489705	0.641287	0.574079	0.282949
EPB41	0.242319	0.220972	0.204789	0.131788	0.513557	0.377661	0.203931	0.109862	0.225465	0.178087	0.658789	0.455604
TMEM200B	0	0	0	0	0.00954627	0	0	0	0	0.0519694	0	0
SRSF4	0.528236	0.666753	0.444493	0.530056	0.785114	0.604495	0.801325	0.4189	0.693438	0.948972	0.704922	0.915039
MECR	0.0597037	0.06488	0.0760672	0.17079	0.038582	0.0303704	0	0.0848107	0.0644511	0.0633927	0	0.026943
PTPRU	0.00221073	0.0157708	0.0058679	0	0.00936049	0.0164487	0	0.0552744	0	0	0	0
MATN1	0.0102083	0	0.0094883	0	0	0	0	0	0	0.0218771	0	0
MATN1-AS1	0.00630132	0.015724	0.0179238	0.0137873	0.0108071	0.0186041	0	0	0.0297984	0	0.060086	0.118666
LAPTM5	9.51947	7.62185	7.43268	11.4251	4.32789	3.16276	5.64124	3.42121	6.0663	3.78371	2.22912	4.46299
SDC3	0.125384	0.00632131	0.0125744	0.0947698	0.00971874	0.0242523	0	0.0481089	0	0.276846	0.105107	0.091749
PUM1	0.479042	0.314206	0.325606	0.245478	0.626169	0.289663	0.426289	0.358764	0.22442	0.450517	0.54924	0.241332
SNRNP40	0.253585	0.369846	0.175219	0.546195	0.307113	0.329917	0.365098	0.31289	0.483008	0.385413	0.258891	0.411092
ZCCHC17	0.299201	0.271336	0.151094	0.409059	0.290521	0.170614	0.256552	0.523927	0.41665	0.341424	0.421241	0.315887
FABP3	0.0318135	0.0350131	0	0.341452	0.01124	0	0	2.08917	0	0.010574	0	0.0635825
SERINC2	0.0405892	0.103644	0.0391584	0.345542	0.106542	0.0228192	0.139684	0.847756	0	0.0582366	0	0.142667
RP11-439L8.3	0.00270881	0	0	0	0.172374	0	0	0	0	0.0218771	0	0
RP11-439L8.4	0	0	0	0	0.1505	0	0	0	0	0	0	0
TINAGL1	0.0361134	0.09093	0.0643836	0.035971	0.0182805	0	0	0.0915833	0.0334963	0.112811	0.0791221	0
PEF1	0.213027	0.341375	0.252826	0.319095	0.234107	0.254291	0.133525	0.192013	0.398881	0.385003	0.882282	0.288298
COL16A1	0.0212103	0.0142485	0.00938676	0.010332	0.0196899	0.0179504	0.00511051	0	0.102928	0.401906	0	0
BAI2	0	0.00277059	0	0	0.00683681	0	0	0	0	0.055335	0	0
RP11-84A19.4	0.0134347	0.0101003	0	0.00832508	0.00885105	0	0	0	0.0222489	0	0	0
PTP4A2	1.68629	2.11143	1.51099	1.31031	1.11931	2.91694	1.21238	1.11866	2.91338	1.63818	0.552273	2.07552
KHDRBS1	1.44252	1.45663	1.39454	1.35498	1.38008	1.36266	1.37094	0.58377	1.52867	1.78162	1.43467	1.24426
RP11-277A4.4	0.0114124	0	0	0.00838632	0.00683681	0	0.0360836	0	0.0685828	0.0128084	0	0
TMEM39B	0.10802	0.0674444	0.078026	0.187323	0.225128	0.0302885	0.14193	0.00746793	0.148923	0.0528035	0.255401	0.046793
KPNA6	0.208147	0.164474	0.20795	0.148046	0.422359	0.203162	0.21392	0.253833	0.279156	0.37409	0.154688	0.415562
TXLNA	0.183502	0.0646177	0.101829	0.101148	0.208352	0.109652	0.101844	0.133858	0.176016	0.29987	0.301039	0.0942548
CCDC28B	0.0472356	0.0765684	0.0609129	0.0676579	0.199999	0.308328	0.144963	0.0218704	0.077491	0.178514	0.141498	0.0965929
IQCC	0.00315175	0	0	0.00936772	0	0	0	0	0.0542806	0.017135	0	0.0137926
DCDC2B	0	0	0.00459408	0	0.010941	0	0	0	0	0.0328396	0	0
TMEM234	0.0580743	0.100503	0.0831218	0.0950224	0.0620516	0.034663	0.0336089	0.0437046	0.208162	0.0990453	0.0590797	0.0482707
EIF3I	0.92255	1.55715	1.21462	1.45464	1.3007	1.36907	1.07325	0.80677	0.685273	1.4975	2.02105	1.24035
FAM167B	0.0110801	0.00429344	0.0226874	0	0.0186761	0	0.0306657	0	0	0	0	0.0646822
LCK	0.0810352	0.0753262	0.0513493	0.0864382	0.0738278	0.229851	0.150133	0.123962	0.0391242	0.205645	1.28735	1.3567
HDAC1	0.219441	0.443683	0.285215	0.443793	0.385971	0.362919	0.332957	0.0675973	0.447196	0.22294	0.898513	0.721207
MARCKSL1	0.847406	1.11886	1.01631	0.4934	0.518339	5.28493	0.523492	0.264659	1.55973	3.72902	1.3562	0.241094
TSSK3	0.0137833	0.0047727	0	0	0	0.0105827	0.0352995	0	0	0.0162549	0	0
FAM229A	0.014269	0.00918069	0	0.00974424	0	0.0495256	0.069179	0.0510428	0.0314608	0.0199288	0	0
BSDC1	0.176633	0.273751	0.13985	0.114439	0.307077	0.138094	0.208056	0.220358	0.266084	0.316135	0.330045	0.296547
ZBTB8B	0.00503225	0.0114637	0	0	0	0.0109833	0	0	0	0	0	0
ZBTB8A	0.0210312	0.0285893	0.00846548	0.0201955	0.0165086	0.0216824	0	0	0.0340483	0.147974	0	0
ZBTB8OS	0.25574	0.541602	0.237764	0.372388	0.377028	0.255066	0.332117	0.915128	0.913325	0.304655	0.161248	0.369813
RBBP4	0.604909	0.639108	0.71557	0.745661	1.07916	0.672064	0.535861	0.422021	0.576408	1.08256	0.980434	0.510541
SYNC	0.041796	0.0501809	0.0427515	0.14065	0.0767769	0.0266186	0.023892	0	0.0598133	0.107783	0.17858	0.110877
KIAA1522	0.0128079	0.0636528	0	0.0573557	0.0117666	0	0	0.0217326	0	0	0	0.026943
YARS	0.160307	0.304562	0.15326	0.182925	0.147289	0.145435	0.11868	0.159711	0.0528665	0.218334	0.0806205	0.314763
S100PBP	0.108715	0.138365	0.136738	0.100435	0.322237	0.0727524	0.0543357	0.0681792	0.144321	0.1799	0.21059	0.187589
TMEM54	0.0232793	0.042367	0.0182482	0.0394546	0.00976362	0	0.0667043	0.103412	0	0.11434	0	0
RNF19B	0.169523	0.112383	0.624669	0.106859	0.0361785	0.0788274	0.154986	0.126731	0.0804281	0.158106	0	0.166254
AK2	0.534192	0.69138	0.599669	0.908858	0.673704	0.354966	0.262785	0.525632	0.385241	0.514387	0.783892	0.52902
ADC	0.0102857	0.0204526	0.0058679	0.0180317	0.154605	0	0	0	0	0.022869	0	0
TRIM62	0	0.00843202	0.0282358	0.0241527	0.031256	0.00767702	0	0.00856816	0.0386518	0.010574	0	0.090768
ZNF362	0.0763791	0.059535	0.0241161	0.0784	0.0503112	0.067343	0.0734444	0.00856816	0.0328097	0.134217	0.084156	0
PHC2	0.557208	0.448865	0.98686	0.254893	0.0784651	0.166061	0.764523	0.123376	0.702001	0.589409	0.217322	0.538033
SMIM12	0.429426	0.385802	0.380675	0.463024	0.485351	0.374844	0.279621	0.563562	0.290896	0.386618	0.708456	0.427032
GJB3	0	0.0187013	0.0182558	0.00763881	0	0	0	0	0	0	0	0
GJA4	0.00628868	0.0157708	0.00821726	0	0.00848112	0	0	0.0286682	0	0.0159678	0	0
DLGAP3	0.0723272	0.0219713	0.0654623	0.058825	0.038957	0.00891893	0	0	0	0.0327777	0	0.0350192
RP11-244H3.4	0.0202878	0	0.0133657	0.0271422	0.0311627	0	0	0.0184043	0.0315613	0	0	0
ZMYM6NB	0.00393944	0.0114637	0.0150127	0	0	0	0	0	0	0	0	0
ZMYM6	0.127324	0.0982108	0.0553832	0.169922	0.0730956	0.166475	0.0882143	0.034957	0.124957	0.105645	0	0.0813142
ZMYM1	0.063556	0.0788126	0.0538952	0.0854771	0.143969	0.0667329	0.117464	0.045203	0.030295	0.0472385	0.327118	0.0902811
SFPQ	2.73455	2.05178	2.91614	1.47394	2.55543	1.69557	2.07903	0.636073	1.78836	3.81379	3.13323	2.54688
ZMYM4	0.288545	0.193933	0.294704	0.091444	0.395965	0.212265	0.336646	0.0408454	0.120769	0.627618	0.492663	0.61398
KIAA0319L	0.134124	0.0791431	0.197277	0.0820807	0.166932	0.0705878	0.281158	0.0338568	0.122704	0.334939	0	0.107557
NCDN	0.0102813	0.0382933	0.0329566	0.0160994	0.0193901	0	0.0800203	0	0	0.00935483	0	0
RP4-728D4.2	0.0205383	0.00924967	0.0213106	0	0	0	0.0801358	0	0	0.0328396	0	0
TFAP2E	0.010938	0	0	0.00419768	0	0	0.0474158	0.0252604	0	0.0128084	0.0741037	0
PSMB2	0.857944	1.22941	1.01938	1.35547	0.987172	1.27382	0.645271	1.05542	0.981797	1.06041	1.00793	1.28493
C1orf216	0.0400266	0.0832683	0.0225361	0.024188	0.0216045	0.0229363	0	0.0724033	0.100905	0	0.1397	0.090768
CLSPN	0.0445447	0.0901463	0.0152954	0.427595	0	0.0578661	0.00511051	0	0.0412923	0.0265816	0.076067	0.101466
AGO4	0.197105	0.0884583	0.209525	0.110491	0.0514954	0.11832	0.605456	0.0512626	0.0309847	0.0484999	0	0.134219
AGO1	0.0754074	0.128771	0.0915482	0.111736	0.0517531	0.0275701	0.213555	0.0782106	0.273506	0.127544	0.131559	0.177417
AGO3	0.367242	0.175746	0.223125	0.22376	0.307822	0.397805	0.218947	0.18524	0.175874	0.433374	0.233706	0.263631
TEKT2	0.00265809	0.0395858	0.0174057	0.0407064	0	0.00467954	0	0.0263888	0	0.0292912	0.0590797	0
ADPRHL2	0.243471	0.270465	0.074826	0.387468	0.11799	0.152975	0.241891	0.222872	0.167764	0.0576377	0.0524753	0.336708
COL8A2	0.0326962	0.0262824	0.0364354	0.0317081	0.00602526	0.0296702	0	0.095534	0	0	0	0.0509295
TRAPPC3	0.591436	0.457999	0.328436	0.628723	0.589031	0.541303	0.295919	1.05083	0.922114	0.478547	1.00769	0.430899
MAP7D1	0.539876	0.503829	0.347871	0.437525	0.690152	0.48213	0.308548	0.62458	0.308224	0.569893	0.314602	0.513461
THRAP3	1.07696	1.05704	0.905487	1.05767	1.09765	1.12153	0.520582	0.616142	0.977886	1.13132	1.60538	1.09031
SH3D21	0.0432434	0.0554168	0.0234718	0.0387801	0.150414	0.310437	0	0.145489	0.0690954	0.0179023	0	0
EVA1B	0.216789	0.0946998	0.102726	0.120249	0.0574867	0.275837	0.256975	0.126797	0.0563884	0.633863	0.0666014	0.389028
RP11-268J15.5	0.012245	0.00949434	0	0	0	0.0188994	0	0.0283727	0	0.0489617	0	0
STK40	0.164597	0.129499	0.130754	0.113106	0.280119	0.0953711	0.110885	0.150277	0.194381	0.237343	0.146054	0.11649
LSM10	0.466611	0.60514	0.54893	0.417384	0.866757	0.369768	0.629482	0.358747	1.00475	0.671132	0.839874	0.894699
OSCP1	0.00275171	0.0371137	0.0131849	0.0988575	0.0196899	0.00889743	0	0.105368	0	0.0638234	0	0
MRPS15	0.648597	0.673702	0.659831	0.895891	0.743466	0.492823	0.273332	0.827073	0.618511	0.666171	0.527823	0.524922
CSF3R	0.713098	0.392672	2.22088	0.447554	0.0586871	0.176968	2.58555	0.26976	0.336807	0.767712	0.0473317	0.849275
LINC01137	0.0151977	0.0213781	0.0152954	0.0236646	0.00954627	0.00988296	0.0323389	0.00856816	0	0	0	0.0137926
ZC3H12A	0.307611	0.21773	0.457743	0.392771	0.173213	0.154731	0.117487	0.354566	0.109169	0.330435	0.389117	0.162358
MEAF6	0.60882	0.772876	0.588187	0.91695	0.816207	0.69128	0.527849	1.05201	0.604312	0.609635	1.92058	0.782072
SNIP1	0.0934403	0.0328221	0.0740897	0.0664198	0.0410009	0	0.216891	0.0352922	0.0551017	0.139269	0.206403	0.20586
DNALI1	0.0625876	0.0509339	0.0196687	0.182602	0.052588	0.0143245	0.0484503	0.145919	0	0.160374	0	0
GNL2	0.281134	0.187851	0.396575	0.321267	0.308954	0.178549	0.124933	0.159487	0.31996	0.306677	0.363488	0.263071
RSPO1	0	0	0.00459408	0	0	0	0	0	0	0.0581158	0	0
C1orf109	0.0315894	0.0537227	0.0278621	0.0436119	0.246993	0.062722	0.0297051	0.15237	0	0.0817413	0.0526319	0
CDCA8	0	0.0266704	0	0.268228	0	0.0193496	0	0.0328495	0	0.0172267	0	0.056656
MANEAL	0.00292254	0.00833521	0	0.018728	0	0.0105827	0	0	0	0	0	0
YRDC	0.102581	0.12054	0.166596	0.136997	0.138978	0.205349	0.0338293	0.179422	0.0686005	0.301365	0.203845	0.162097
C1orf122	0.407262	0.404252	0.268088	0.382889	0.404298	0.284226	0.20878	0.798241	0.280925	0.663744	0.487976	0.46084
MTF1	0.124647	0.0844163	0.111526	0.0949456	0.0719785	0.0576845	0.234004	0.0624064	0.228227	0.0756198	0	0.14758
INPP5B	0.0699643	0.165145	0.0193681	0.093162	0.0767989	0.137665	0.0574178	0	0.027264	0.0969974	0.205858	0.182094
SF3A3	0.287493	0.375212	0.324901	0.520147	0.368629	0.29733	0.0153315	0.374873	0.207704	0.446914	0.280322	0.482062
FHL3	0.220883	0.59004	0.24037	0.146474	0.0514552	0.122481	0.339824	0.0132215	0.105968	0.943645	0.276168	0.158316
UTP11L	0.366376	0.340036	0.211671	0.410293	0.304454	0.204718	0.172121	0.223997	0.423624	0.358847	0.150291	0.207632
POU3F1	0	0.0217635	0	0.0141299	0.00926226	0.0251474	0	0	0	0.0505326	0.156628	0
RRAGC	0.349674	0.21782	0.177898	0.448133	0.590039	0.441146	0.18286	0.316607	0.272086	0.2822	0.356385	0.186507
RP5-864K19.4	0.00252451	0.0155179	0.0269152	0.00838106	0.0241364	0.0138472	0.0721673	0.0184105	0	0.0168099	0	0.0137926
MYCBP	0.143001	0.212612	0.186773	0.27447	0.371544	0.175198	0.204835	0.251227	0.307067	0.213433	0.512663	0.026943
AKIRIN1	0.592796	0.495092	0.55879	0.337988	0.828617	0.459018	0.327994	0.450713	0.682248	0.476681	0.946762	0.726621
NDUFS5	2.48303	2.99094	2.87713	3.08946	3.45073	2.12998	2.97397	3.57896	2.4575	3.14128	2.78027	3.52634
MACF1	0.874214	0.718296	0.542317	0.540945	0.55429	0.691262	0.654789	0.157127	0.650914	1.33159	2.02778	1.36027
KIAA0754	0.0234577	0.00579542	0.00299373	0.0717064	0	0	0.0484637	0	0	0.0421938	0.0526319	0.105418
RP11-69E11.4	0.170906	0.00883353	0.045741	0.0449205	0.0238497	0.0104051	0	0.455375	0.0619414	0.115885	0.0714725	0.0700383
PABPC4	1.82084	0.803622	0.945446	0.715897	0.598625	0.952434	0.818233	1.16329	1.24911	0.66448	1.08965	0.665339
HEYL	0.00853796	0	0	0.00376113	0	0.00843233	0	0	0.0234471	0.0179094	0	0
PPIE	0.273841	0.357186	0.107782	0.417903	0.297064	0.206191	0.278397	0.388029	0.183603	0.235514	0.262743	0.284124
BMP8B	0.00679778	0	0	0.0236619	0	0	0.0338293	0	0	0	0	0
OXCT2	0.0747601	0	0	0.0377092	0	0.0664428	0	0.0552315	0	0.0283957	0	0
TRIT1	0.050882	0.085885	0.0440506	0.0959266	0.139076	0.0688624	0.103385	0.0246042	0.0285124	0.0179094	0.0825246	0.125787
MYCL	0.055599	0.117269	0.0689172	0.0571746	0.384211	0.261943	0.185824	0.0286682	0.0738212	0.0392817	0	0.0852777
MFSD2A	0.0919392	0.0589805	0.0392085	0.139845	0.12438	0.0111916	0.0476617	0.557464	0.0222489	0.0587957	0	0
CAP1	2.55168	3.25982	2.32457	3.41297	1.80143	3.30226	2.66403	2.37282	4.1201	1.43912	2.35405	3.71154
PPT1	2.51533	1.99523	1.51193	2.90718	0.196197	4.50817	2.51175	4.01389	1.53951	1.32227	0.77304	1.52906
RLF	0.4318	0.362796	0.486576	0.245134	0.287135	0.248277	0.335985	0.293509	0.185489	0.731972	0.527616	0.464421
RP1-39G22.7	0.0104268	0.0299713	0	0.0176624	0.0537266	0.0279867	0.0474158	0.105655	0.0542806	0	0	0.0567299
ZMPSTE24	0.275724	0.279008	0.387696	0.287754	0.182081	0.131747	0.455788	0.180368	0.335064	0.256757	0.295144	0.195742
COL9A2	0.0452319	0.0590759	0.0446104	0.062919	0.00849459	0.0372243	0.128378	0	0.173595	0.0328396	0.149385	0
SMAP2	2.0732	1.28196	4.05541	0.695878	2.26613	1.29615	3.65904	0.65415	4.05201	2.3376	5.17074	2.87115
ZFP69B	0.0181676	0.0131523	0	0.0107447	0.0292833	0.0852941	0	0	0.0305968	0.0334816	0	0
ZFP69	0.00647661	0	0.0275586	0.00380872	0.00670916	0.0445137	0	0.0225978	0	0.0138048	0.0741037	0
RP11-656D10.3	0	0	0	0.0095709	0.0218863	0.0103165	0	0	0	0	0	0
EXO5	0.0256326	0.0138368	0.00299373	0.0219293	0	0.0085142	0	0.00746793	0	0	0	0
ZNF684	0.0401768	0.0298501	0	0.0165816	0.0187345	0.0107826	0	0.0281627	0.112835	0.0128084	0	0
RIMS3	0	0	0	0.00299944	0.0383532	0	0	0	0	0	0	0
NFYC-AS1	0.0157194	0.0204037	0	0.0210524	0.00720471	0	0.0323389	0	0.0740664	0.0138048	0.0961501	0
NFYC	0.291401	0.36335	0.257513	0.394115	0.164536	0.278446	0.285491	0.333043	0.320793	0.0738623	0.159743	0.428869
CITED4	0.118087	0.089313	0.20583	0.232199	0.0347734	0.0568338	0.228394	0.187989	0.134075	0.153105	0.466711	0.188013
CTPS1	0.101954	0.0408463	0.0685982	0.112559	0.134398	0.0868374	0	0	0.0661939	0.0700241	0.199697	0.0407356
SCMH1	0.0283905	0.0436477	0.0239104	0.0210453	0.090663	0.104223	0	0	0	0.180835	0.456057	0.0340209
EDN2	0	0	0.0224937	0.0285895	0.00980575	0	0	0.0604033	0	0	0	0
HIVEP3	0.170373	0.0457185	0.03279	0.12667	0.276913	0.0701661	0.0769143	0.00746793	0.105512	0.108354	0.192329	0.170869
FOXJ3	0.130384	0.141734	0.163776	0.163569	0.292503	0.0943486	0.144697	0.0931206	0.157404	0.309511	0.432946	0.160766
RIMKLA	0	0.0462681	0	0.0120208	0	0	0	0	0	0	0	0
ZMYND12	0.0125004	0.0108442	0	0	0	0	0	0.0278243	0	0	0	0
PPCS	0.630236	0.66965	0.476966	0.552634	0.599944	0.493071	0.636708	0.549456	0.477619	0.516573	0.701402	0.838833
CCDC30	0.0209961	0.0404838	0.0243493	0.0129239	0.181944	0	0.0314688	0	0	0.0911335	0	0
PPIH	0.201542	0.290046	0.124816	0.413776	0.249616	0.239552	0.165479	0.196239	0.118457	0.338754	0.294464	0.166624
YBX1	11.8642	11.8985	10.4379	13.1578	6.69997	10.136	8.15204	16.3745	14.9918	9.17138	6.48016	9.30659
LEPRE1	0.1171	0.117061	0.0867679	0.0758479	0.120196	0.0597845	0.0297051	0.00575353	0.0994509	0.485953	0.170369	0.103025
C1orf50	0.0814434	0.145255	0.15503	0.230362	0.101141	0.193985	0.159262	0.102315	0.191244	0.0473923	0.252841	0.133736
CCDC23	0.660436	0.463721	0.203079	0.509358	0.245606	0.298509	0.579554	0.142184	0.502809	0.283914	0.0629667	0.586084
ERMAP	0.0832698	0.0572105	0.0427277	0.068462	0.0406421	0.027525	0.0925062	0	0.030295	0.0285401	0	0.120297
RP11-342M1.3	0.0353837	0.0112638	0.00983731	0	0.0104194	0.0196064	0	0.0888359	0	0.0168099	0	0
ZNF691	0.00641505	0.0273889	0	0.0479263	0.00993759	0.0312185	0	0	0	0.0188184	0	0.0852777
SLC2A1	0.0179962	0.3175	0.0745345	0.343113	0.307739	0.15521	0.0747626	0.142774	0.0274583	0.180386	0.0963753	0.196171
FAM183A	0.0446122	0.0909576	0.0463223	0.162412	0.0329741	0.0324796	0	0.223414	0.0297984	0.0600378	0.138247	0
EBNA1BP2	0.226308	0.491319	0.178508	0.405426	0.291672	0.175856	0.0636448	0.237963	0.360592	0.311154	0.0707489	0.168127
WDR65	0.00944425	0	0	0.0228647	0	0.0101717	0	0	0	0	0	0
TMEM125	0.00506753	0.0458923	0	0.00590207	0	0.0228192	0	0.00746793	0.0225715	0	0	0.0728231
C1orf210	0	0.00833521	0	0.00214858	0	0	0	0	0	0	0	0.032317
TIE1	0.0225421	0.0319588	0.0379829	0.00832508	0	0.0154235	0	0	0.0285124	0.0297726	0.060086	0
RP1-92O14.3	0.00523411	0.00341346	0	0	0	0	0	0.0184043	0	0	0	0
CDC20	0.0125267	0.0349732	0.0389	0.510583	0.00602526	0.0408435	0.0389864	0	0	0	0	0
ELOVL1	0.310402	0.292527	0.17588	0.499909	0.155911	0.220688	0.17239	0.197587	0.465115	0.196889	0.297514	0.373104
MED8	0.218184	0.243775	0.284343	0.379532	0.0781683	0.183547	0.291093	0.35244	0.169367	0.286647	0.0608761	0.359384
SZT2	0.0745046	0.0114353	0.0263913	0.0337818	0.0546704	0.0649984	0.0781084	0.0516563	0.100636	0.0783959	0.130552	0
HYI	0.125575	0.205541	0.0639381	0.23316	0.204864	0.0846318	0.0755116	0.199646	0.0370392	0.263937	0.780759	0.0804541
PTPRF	0.0274326	0.0177173	0.0165508	0.0588668	0.00980575	0.0249072	0	0.107186	0	0.0797633	0	0
KDM4A	0.0606747	0.0701853	0.0728042	0.0705132	0.150471	0.0305348	0.0397959	0.0332054	0.176702	0.0855622	0.130552	0.0255989
ST3GAL3	0.0359221	0.0184237	0	0.0130394	0.0162424	0.0324796	0	0.0418598	0	0.0721118	0.189943	0.0596198
IPO13	0.0295918	0.0552987	0.0244512	0.0350588	0.0443827	0	0.0357014	0.0641281	0	0	0	0
DPH2	0.0373907	0.0639778	0.0541908	0.0581038	0.0384548	0.0499138	0	0	0	0.066167	0.0707489	0.0481372
ATP6V0B	3.79463	3.11803	3.83818	4.26562	3.48869	2.12497	2.9029	8.1199	3.32441	1.98599	1.20796	1.90943
B4GALT2	0.009264	0.0341722	0.012599	0.0494307	0.0308352	0.0201323	0	0	0	0.0442496	0	0.0482707
CCDC24	0.03874	0.00785994	0.00727599	0.0269776	0	0	0.0381886	0	0.0737717	0.0407701	0	0.090768
SLC6A9	0	0.025073	0	0	0	0	0	0	0	0.0352327	0	0
DMAP1	0.101374	0.0634949	0.0896252	0.181141	0.196599	0.0619563	0.11637	0.134317	0.186078	0.141544	0.278675	0.128585
ERI3	0.191231	0.181471	0.144567	0.25397	0.2169	0.141374	0.24127	0.290586	0.211468	0.363019	0.253209	0.0620633
RNF220	0.130704	0.151059	0.11815	0.143837	0.174241	0.0510033	0.0828341	0.273441	0.137801	0.0700579	0.148782	0.26219
TMEM53	0.0473156	0.0578151	0.0249698	0.0481436	0.194412	0	0.0931992	0.10655	0.11245	0.0549013	0	0.0789617
C1orf228	0.0389035	0.189036	0.178888	0.0116546	0.240598	0	0.0897793	0.129316	0	0.0555345	0	0
KIF2C	0	0.0044609	0.00459408	0.230767	0	0.0139285	0.0349115	0	0	0.0172267	0	0.0275853
RPS8	26.032	33.7122	38.4764	23.7032	52.0169	42.6248	39.2502	30.0409	35.2221	40.4337	29.7859	24.612
BEST4	0.0148344	0.011183	0	0.00279669	0	0	0	0.0410405	0	0.0141911	0	0
PLK3	0.893483	0.36778	0.381555	0.584189	0.209203	0.463205	0.511692	0.315592	0.637401	1.12022	0.574062	0.447623
TCTEX1D4	0.00524284	0.00243119	0.00779035	0.0322438	0	0	0	0.0297919	0.0222489	0	0	0
BTBD19	0.0858385	0.00843202	0.0784111	0.0153281	0.0121829	0.0238628	0	0.0248164	0.0307208	0.183748	0	0.103523
PTCH2	0.087245	0.094267	0.0247571	0.0234115	0.530983	0.0234538	0.0265776	0.0321157	0.0817389	0.161611	0.244805	0.0211942
EIF2B3	0.183771	0.17795	0.0727909	0.137994	0.158581	0.0662184	0.0900382	0.130593	0.21852	0.176003	0.0791221	0.148447
HECTD3	0.0539792	0.0247575	0.0101857	0.0603027	0.046478	0.0181775	0.0270613	0.0144025	0.0346611	0.0736139	0.0714725	0
UROD	0.264159	0.277869	0.208287	0.334256	0.238718	0.197098	0.163785	0.505283	0.178869	0.202134	0.189632	0.0801305
MUTYH	0.089934	0.0866266	0.0140037	0.0471206	0.0843809	0.0716767	0.0888728	0	0.036265	0.0894334	0.084156	0.0943383
TOE1	0.0385868	0.0389027	0.0384533	0.0900007	0.042083	0.0213884	0.032176	0.0343484	0.0307208	0.0469177	0	0.0907992
TESK2	0.0778917	0.0747597	0.0157052	0.0363588	0	0.00733504	0.0444824	0.0598403	0.122883	0	0	0.128874
CCDC163P	0.00275171	0.00323615	0	0	0.0104194	0	0	0.0263888	0	0	0	0.026943
MMACHC	0.0121483	0.00323615	0.00299373	0.0132331	0	0	0	0	0	0	0	0
PRDX1	4.67056	4.2215	1.69913	7.94137	1.16554	1.87919	2.64377	10.045	2.25179	2.24556	1.1892	3.20189
AKR1A1	1.58153	1.30359	0.618033	2.05423	0.813695	0.671918	0.73092	2.57023	0.951912	0.946516	0.155628	0.858671
NASP	0.722158	0.604895	0.528081	1.09727	0.691041	0.614113	0.470301	0.163367	0.334437	0.922852	0.746369	1.06575
CCDC17	0.0208572	0.0443988	0.0391148	0.0076946	0.0362416	0.00906874	0.039336	0.10003	0	0.0161221	0	0
GPBP1L1	0.331356	0.37622	0.249411	0.421374	0.389803	0.234178	0.290424	0.341529	0.423089	0.428907	0.819796	0.235053
TMEM69	0.191375	0.1727	0.278383	0.182113	0.0859759	0.0736803	0.198493	0.117657	0.380143	0.209685	0.060086	0.281543
IPP	0.0232282	0.00346682	0.0165259	0	0.0207085	0.0107694	0	0.0346717	0	0.0665118	0.195902	0.0651691
MAST2	0.0554893	0.0566573	0.0356874	0.0919319	0.0296131	0.0333205	0.00511051	0	0	0.112516	0.0524753	0.0866008
PIK3R3	0.0822552	0.067621	0.00459408	0.124403	0.0912317	0.0704283	0.00511051	0.0275431	0	0.153043	0.0699868	0.0535111
TSPAN1	0.0627861	0.317106	0.0252866	0.674154	0.0271571	0.0509312	0.261598	0.835015	0.0704912	0	0	0.128874
POMGNT1	0.181343	0.0632079	0.0926603	0.100414	0.17428	0.124528	0	0.195821	0.133612	0.166837	0.0714725	0.266139
LURAP1	0	0.0107256	0	0.0300693	0	0	0	0	0	0	0	0
RAD54L	0.00546134	0.00699375	0	0.0381705	0	0	0	0	0	0.0300351	0	0
LRRC41	0.213979	0.220162	0.163777	0.292988	0.359289	0.154409	0.265819	0.0842778	0.167748	0.556993	0.401838	0.130126
UQCRH	3.32078	4.32891	4.28496	4.03079	2.3694	3.77442	5.08185	2.57315	3.61446	3.55965	3.3646	3.9139
NSUN4	0.087196	0.0302321	0.0976194	0.0672388	0.217406	0.0455823	0.0357762	0.0423884	0	0.0550773	0.113933	0.0214317
FAAH	0.0189625	0.0127578	0.0212997	0.0305629	0.0444731	0.0101717	0.070033	0.0263888	0	0.0484904	0	0
LINC00505	0	0	0	0	0.100293	0	0	0	0	0	0	0
MKNK1	0.841892	0.342364	0.388986	0.427549	0.219421	0.0959352	0.196654	0.198352	0.268686	0.190334	0.719834	0.33535
MOB3C	0.119283	0.0376548	0.0495296	0.0628607	0.0288717	0	0.099361	0.0297919	0.194824	0.0985904	0.0773377	0.0482707
ATPAF1	0.134769	0.156317	0.156564	0.227938	0.0997387	0.101892	0.029801	0.138205	0.0264794	0.159649	0.344721	0.26245
EFCAB14	0.680061	0.502228	0.540627	0.435052	0.854204	0.360391	0.397676	0.376715	0.516467	0.621506	0.72795	0.745509
CYP4B1	0	0	0	0.00538687	0	0.0155344	0	0	0	0	0	0
PDZK1IP1	0.0197629	0.158948	0	0.39256	0	0.0453295	0.0336089	0.541466	0.0642705	0	0.084156	0
TAL1	0	0.0320792	0.00459408	0	0.0113001	0	0	0	0	0	0	0
STIL	0.0181346	0.0044609	0	0.0725019	0.0269376	0	0.00511051	0	0	0.0516802	0.0526319	0
CMPK1	0.973509	1.03945	0.727214	1.11936	1.22399	1.00646	0.975543	1.7564	0.565744	0.940348	1.55009	0.836679
FOXD2-AS1	0.0231287	0.00541373	0	0	0.0120123	0	0	0	0	0.0141978	0	0
FOXD2	0.00342424	0.00290945	0	0	0	0	0	0	0	0.010574	0	0
SPATA6	0.0952574	0.0428	0.147734	0.0830342	0.0451983	0.051791	0.071781	0	0.417534	0.10634	0	0.209206
AGBL4	0	0	0	0.0128273	0.00720471	0	0	0	0	0.0159678	0	0
BEND5	0.0105322	0.00743965	0	0	0.034221	0.0673409	0	0	0	0.00854745	0	0
ELAVL4	0.0955016	0.117028	0	0.042138	0	0	0	0	0	0	0	0.0794849
RP5-850O15.4	0	0.00573279	0	0	0.0121829	0	0	0.0300971	0	0	0	0
FAF1	0.185875	0.150344	0.168489	0.187286	0.127165	0.207156	0.150101	0.13751	0.179724	0.180979	0.433261	0.253954
CDKN2C	0.21886	0.141341	0.00299373	0.367161	0.0935565	0.332379	0.0647038	0	0.0285124	0.0674726	0	0.223752
RNF11	0.33083	0.36359	0.393077	0.313024	1.24973	0.245153	0.499167	0.289121	0.264319	0.425943	0.377606	0.687636
TTC39A	0.00221073	0	0	0.00956916	0.208514	0.00559382	0	0	0	0	0	0.0253306
RP11-275F13.1	0	0.00277059	0	0	0.034376	0	0	0	0	0	0.0699868	0
EPS15	0.441026	0.279673	0.514714	0.242382	0.689999	0.38128	0.580092	0.211113	0.465518	0.456819	1.52234	0.499253
OSBPL9	0.259402	0.287835	0.0641101	0.129406	0.385679	0.457276	0.150198	0.286316	0.301342	0.218352	0.287249	0.121412
NRD1	0.805571	0.802576	0.863044	0.586117	1.34245	0.815714	0.673208	0.319566	0.688365	0.950293	1.02056	1.33306
RP4-657D16.3	0.00388181	0	0.01721	0	0	0	0	0	0.0309847	0	0	0
TXNDC12	0.692183	0.576236	0.599968	0.941884	0.598382	0.43375	0.400052	0.736257	0.488029	0.73106	0.71778	0.470256
KTI12	0.0346883	0.0903643	0.0294323	0.0481591	0.105204	0.0308652	0.0937606	0.121221	0.068105	0.0807135	0.328272	0
BTF3L4	0.86813	0.80323	0.777879	1.24403	0.505745	0.523953	1.2463	0.82282	0.850499	0.79948	0.702746	0.870918
ZFYVE9	0.0173655	0.00946302	0.0107578	0.00712869	0.00979941	0.00982971	0	0	0	0.165892	0.306478	0
CC2D1B	0.0817192	0.045027	0.0254235	0.0149181	0.0443137	0.0717847	0.077677	0.0194656	0.027876	0.01983	0	0.0211942
ORC1	0.0162103	0.00421086	0	0.0167356	0.0120298	0	0.010221	0	0	0	0	0.0669768
PRPF38A	0.420959	0.410329	0.410856	0.384439	0.460971	0.250947	0.213438	0.335727	0.186719	0.35538	0.88582	0.27084
ZCCHC11	0.731726	0.73821	0.355808	0.335915	1.40051	0.272893	0.315551	0.134067	0.158546	1.60158	1.69499	0.780002
GPX7	0.102231	0.118341	0.053378	0.0887804	0.409673	0.0217952	0.020442	0.0184105	0	0.544997	0.140258	0.0478135
FAM159A	0.0822409	0.140606	0.0164617	0.0825211	0.0272105	0.0297401	0.0381886	0	0	0.160203	0.0590797	0.104441
COA7	0.00588433	0.025972	0.0173833	0.0425908	0	0.0569483	0	0.0305784	0	0	0	0.0340209
ZYG11B	0.116856	0.049134	0.0812931	0.0638949	0.0697041	0.0126712	0.215664	0.158691	0.168094	0.127252	0.194525	0.0852777
ECHDC2	0.160538	0.130646	0.0885314	0.111381	0.160938	0.177426	0.010221	0	0.0346611	0.247793	0.285928	0.181529
SCP2	1.41619	1.67111	1.30118	1.94984	1.36355	0.823564	1.24371	1.96451	1.23111	1.20444	1.72278	1.28455
PODN	0	0	0	0	0	0.00946569	0	0	0	0.0885844	0	0
CPT2	0.0983399	0.0610036	0.0211841	0.111331	0.00971874	0.0694539	0.0692132	0.0882989	0.0562973	0.030446	0	0
C1orf123	0.250714	0.259734	0.285026	0.329461	0.230821	0.227847	0.378125	0.358131	0.584826	0.377606	0.435456	0.183366
MAGOH	0.723896	1.00034	0.899008	0.983252	0.944586	0.563396	0.765684	0.843255	0.842801	0.800506	0.749433	0.905449
RP5-1024G6.5	0	0.0157708	0	0	0	0	0	0	0	0	0	0
RP5-1024G6.8	0.0036619	0	0	0	0.0382856	0.0314193	0	0	0	0	0	0
LRP8	0.0131219	0.0144674	0	0.0158856	0.142032	0.039792	0	0	0.0347991	0	0	0.135205
RP11-117D22.2	0.0106921	0	0	0	1.26742	0	0	0	0.0274583	0.0320898	0	0
NDC1	0.0587616	0.065458	0.0123805	0.147061	0.0255751	0.0207596	0.0634811	0.0689714	0.0222489	0.0768662	0	0.097486
YIPF1	0.158547	0.13723	0.170354	0.203806	0.135106	0.115396	0.0682674	0.027624	0.219282	0.111007	0.254373	0.0340209
HSPB11	0.507459	0.697153	0.429627	0.764559	0.684182	0.714981	0.490866	0.402351	0.518396	0.544253	0.755269	0.778598
LRRC42	0.0850587	0.0904098	0.0118405	0.109646	0.0812594	0.0534672	0.0270655	0.0966087	0.027264	0.18259	0.143401	0.0461096
LDLRAD1	0	0.010199	0	0.0227411	0.022876	0	0	0.0281158	0	0	0	0
RP4-758J24.5	0.00221073	0	0.00979557	0	0.0174952	0	0	0.0627731	0	0.028964	0	0
TMEM59	2.5047	2.72088	1.83806	2.92285	2.7743	1.35662	2.19191	3.816	2.61034	2.56521	2.88895	1.96651
TCEANC2	0.0560066	0.0679547	0.0273987	0.0522456	0.0613919	0.0559225	0.059673	0.0395836	0.0899335	0.0141911	0	0.0822916
AL357673.1	0	0	0.00299373	0	0	0	0	0	0	0.0188184	0	0
CYB5RL	0	0.00471979	0	0.0104737	0	0	0	0.0132215	0	0	0	0
MRPL37	0.245397	0.213709	0.142603	0.427334	0.198086	0.216097	0.139734	0.220154	0.262088	0.198175	0.204803	0.168267
SSBP3	0.0974504	0.113991	0.11606	0.147318	0.0170257	0.0999068	0.275382	0.0286682	0.0619809	0.305851	0.418074	0.0694649
ACOT11	0.0424369	0.0438363	0	0.0462364	0	0	0	0.00856816	0	0.00850602	0	0
TTC4	0.0263321	0.0418817	0.0350476	0.0152782	0.03056	0	0	0.0510428	0	0.0479808	0.102709	0.0137926
DHCR24	0.0304096	0.0388514	0.00730142	0.064757	0	0.00467954	0.0576522	0.0149359	0.0592822	0.0188184	0	0.0275853
USP24	0.148455	0.0472142	0.124172	0.0589154	0.515948	0.0813231	0.0994826	0.0571898	0.124059	0.212755	0.0524753	0.0620633
PPAP2B	0.0352809	0.0227606	0.124105	0.0194232	0.0288145	0.326247	0	1.6621	0	0.393208	0	0
PRKAA2	0	0.0128739	0.0184711	0.0172497	0.0218643	0.0173532	0	0.0248164	0	0	0	0
C1orf168	0.00494481	0.0121998	0	0.0336927	0	0	0.0327006	0	0	0.0135142	0	0
OMA1	0.134778	0.147221	0.0834151	0.12309	0.134791	0.107675	0.188315	0.181521	0.0801592	0.108691	0.34225	0.0567299
TACSTD2	0.417088	0.856765	0.049212	0.897116	0.0714321	5.79028	0.227128	0.81582	0.0842673	0.363992	0	0.383519
MYSM1	0.300421	0.190793	0.367957	0.130486	0.469311	0.295582	0.273219	0.0333218	0.236537	0.357233	0.28653	0.583051
JUN	7.33174	6.4988	1.95132	12.2416	1.97643	2.64783	2.47385	6.8732	1.23291	16.916	5.94622	5.21924
FGGY	0.0391455	0.0818525	0.0176285	0.0800618	0.0715331	0.0720705	0.109095	0.133836	0.0535562	0.0128084	0	0.0632139
HOOK1	0	0.0319037	0	0.00299944	0.0194173	0	0	0	0	0	0.172471	0.0255989
CYP2J2	0	0	0	0	0.0120202	0.0107826	0	0	0	0.014266	0	0
C1orf87	0.011104	0	0	0.0165784	0	0	0	0.0114158	0	0	0	0
NFIA	0.0822824	0.024582	0.0808281	0.0662134	0.0546007	0.0293617	0.175792	0.0453892	0.122515	0.196913	0	0.0350192
TM2D1	0.303355	0.448678	0.380344	0.293453	0.729051	0.353985	0.594096	0.486243	0.396377	0.715127	0.772377	0.691569
RP11-430G17.3	0	0.00541373	0	0	0.0123501	0.024682	0	0	0	0	0	0
INADL	0.00896207	0.0242216	0.00846548	0.0332042	0.0219034	0.0554497	0.0713075	0.0281158	0	0.022978	0.0699868	0.0350192
L1TD1	0.0138229	0	0	0.0264979	0	0	0	0.0114158	0.186489	0	0	0
USP1	0.241497	0.348949	0.207888	0.721397	0.41223	0.239527	0.407205	0.21367	0.243805	0.332505	0.338239	0.63063
DOCK7	0.202619	0.117208	0.0679982	0.113899	0.0302151	0.125459	0.0900276	0.149144	0.0654453	0.191972	0.254619	0.125097
ATG4C	0.298172	0.259906	0.0450376	0.356	0.227444	0.0426369	0.333443	0.242324	0.163569	0.0891199	0.060086	0.0461096
ALG6	0.0350211	0.0706781	0.057788	0.0977846	0.102955	0.0170604	0	0.0871256	0.100927	0.0808122	0.29742	0.0567299
ITGB3BP	0.0849175	0.11423	0.122286	0.480909	0.151765	0.109343	0.20787	0.0785246	0.198765	0.252707	0.157958	0.139219
EFCAB7	0.00810092	0.0107256	0.0182482	0.0348902	0.0215809	0.0138472	0	0	0.0768521	0.0391039	0	0.12344
DLEU2L	0.00275171	0.0177406	0.0961478	0.0523555	0.0414215	0.0242345	0	0	0	0.0136232	0	0.0340209
PGM1	0.163783	0.218998	0.0804116	0.224314	0.232806	0.110175	0.257192	0.0777659	0.146181	0.232039	0.529874	0.219714
ROR1	0	0.00351524	0.00299373	0	0.0117666	0.0638052	0	0	0	0.077144	0	0.046295
CACHD1	0.0142697	0.00880786	0.0292442	0	0.0184413	0.0231552	0	0	0	0.0467171	0	0
RAVER2	0.0110261	0.00452411	0	0	0.00896363	0.0291954	0	0	0	0	0	0
JAK1	1.53788	1.10085	1.92618	0.915264	2.08286	2.51925	1.00026	1.06	1.8028	2.12617	3.22707	2.75775
AK4	0.0212077	0.0553976	0.021242	0.116905	0	0.0251474	0.0699986	0.474541	0	0.0168099	0	0.0916809
LEPR	0.0372203	0.0116635	0.0962716	0.0190836	0.0421841	0	0.100771	0.119448	0.0389299	0.0863075	0	0.0137926
LEPROT	0.844895	0.506595	1.10145	0.64503	1.05048	0.362834	0.58445	1.51185	0.678203	1.1975	1.12724	0.819381
PDE4B	1.72614	0.848695	1.96867	0.660238	2.22353	1.61303	0.355189	0.150658	0.521596	0.905679	1.53355	1.98876
SGIP1	0.00221603	0.00878495	0.0212829	0	0	0	0	0	0	0.0425301	0.279047	0
TCTEX1D1	0.0701374	0.0611345	0.0316017	0.0633639	0	0	0.00511051	0	0	0	0.0676599	0.0211942
WDR78	0.0185844	0.016399	0.0192832	0	0.0156094	0	0	0.0527777	0	0.0773297	0	0
MIER1	0.560465	0.486107	0.499783	0.428474	0.493218	0.520487	0.483221	0.325284	0.521801	0.681313	1.0101	0.72307
SLC35D1	0.0452563	0.0306532	0.0620875	0.0161088	0.019396	0.0820881	0.0360836	0.063917	0	0.134157	0.115599	0.167172
IL23R	0	0.0336392	0	0	0	0.0101717	0	0	0	0	0.805116	0
IL12RB2	0.0130317	0	0	0.00783285	0.0120298	0.0218898	0	0	0	0.0128084	0	0.0423883
SERBP1	2.65905	2.45733	2.23891	2.78042	2.9375	2.32756	1.78329	2.15294	2.48222	2.93668	3.58415	2.72604
GADD45A	0.304359	0.332718	0.429828	0.238453	0.978159	1.32662	0.15341	0.708553	0.243434	1.61684	0.63653	0.362211
GNG12	0.0141025	0.00924179	0.0105815	0.0519575	0.0275753	0.0186335	0.0419008	0.0982992	0.030295	0.214203	0.381141	0
WLS	0.156631	0.00862306	0.097451	0.0729906	0.0647886	0.0916315	0.0652541	0.037345	0.170025	0.810177	0.134261	0.111633
DEPDC1	0	0	0.00459408	0.156879	0.0120298	0.0324824	0.010221	0	0	0.0942027	0	0.0137926
LRRC7	0.0033518	0.0290002	0	0.0119186	0.0105402	0	0	0	0	0.0716493	0	0.0340209
LRRC40	0.113819	0.062332	0.086167	0.135421	0.114883	0.0863106	0.0661682	0.0263888	0.095176	0.109666	0.149192	0.0349868
SRSF11	1.21721	1.25751	1.26983	1.29946	1.85771	1.33372	1.02016	0.973437	1.13905	2.20018	2.11487	1.81405
ANKRD13C	0.160797	0.0621107	0.0682994	0.0669007	0.148262	0.0782139	0.18186	0.00746793	0.0654093	0.180176	0.130547	0.137184
HHLA3	0.0348909	0.0801918	0.00938676	0.097849	0.0559596	0.0107826	0.0562384	0.171472	0.0346611	0.0619841	0.190543	0.0407356
CTH	0.00934629	0.0250948	0	0.0411765	0.019396	0.0308115	0.023084	0.0855536	0	0.0268289	0	0
PTGER3	0.00524284	0.00802111	0	0	0	0.023119	0	0	0	0	1.08249	0
ZRANB2	0.43603	0.551733	0.41557	0.536165	1.08411	0.348719	0.427827	0.269184	0.891539	0.820318	0.936219	0.962128
NEGR1	0.012131	0	0	0.00338726	0.02041	0.144522	0.00511051	0	0	0.0588186	0.238597	0
LRRIQ3	0.00685913	0.00459801	0	0	0.0128986	0	0	0	0	0	0	0
FPGT	0.036238	0.0915904	0.103271	0.0679118	0	0.0322338	0.144883	0.159599	0.164823	0.0831947	0.0526319	0.218137
C1orf173	0.0184556	0.0370443	0.0172574	0.0202183	0.0101631	0.0193535	0.0444824	0	0	0.0310011	0.176736	0
CRYZ	0.0568368	0.105471	0.0266515	0.234549	0.0753706	0.0432332	0.166274	0.203653	0.0297984	0.0927099	0.357077	0.115565
TYW3	0.180286	0.192104	0.178264	0.241336	0.234101	0.161281	0.197819	0.202447	0.153634	0.139344	0.386547	0.120126
ACADM	0.433825	0.470129	0.329042	0.446577	0.645547	0.256696	0.466894	0.275919	0.324418	0.480964	0.328509	0.598508
RABGGTB	0.634024	0.673038	0.300273	0.700156	0.543678	0.4184	0.501684	0.599543	0.633082	0.47336	0.58137	0.573043
ST6GALNAC3	0.00704763	0.00449638	0.110948	0	0	0.0293616	0	0	0	0.0648032	0.0963753	0
PIGK	0.116072	0.106984	0.0405793	0.25085	0.23644	0.108071	0.0369734	0.142575	0.0591868	0.146776	0.117319	0.0391233
AK5	0	0.013794	0	0.00839006	0	0.00924893	0	0.0774549	0	0	0	0
ZZZ3	0.075069	0.147463	0.1198	0.124656	0.214598	0.115617	0.162701	0.245171	0.149068	0.0843825	0	0.0137926
USP33	0.343052	0.253637	0.285788	0.279994	0.451645	0.290591	0.668993	0.0735418	0.576249	0.502209	0.547188	0.240392
FAM73A	0.0901968	0.13835	0.0211513	0.0966526	0.0977811	0.0902405	0.128997	0.165188	0.138021	0.204774	0.176771	0.162376
NEXN	0	0	0	0.110612	0.00981422	0	0.0550554	0.0446756	0.152165	0.00850602	0	0
FUBP1	0.479508	0.546394	0.638727	0.531706	0.574762	0.523735	0.217504	0.331906	0.420042	0.649209	1.45787	0.815549
DNAJB4	0.382316	0.309252	0.0855693	1.00711	0.613437	0.136368	0.111916	0.123627	0.185024	0.332148	0.197328	0.225604
GIPC2	0.0096579	0	0.00459408	0.035844	0.010941	0	0	0	0	0	0	0
RP11-386I14.4	0.672587	0.60134	0.448458	0.165241	0.670549	0.047032	2.03548	0.122563	0.338682	0.21785	0.482242	1.18345
IFI44L	0.673195	0.135681	0.468687	1.32888	1.08796	0.0285802	0.1431	0.441402	0.681344	0.39055	0.645989	0.170143
IFI44	0.627641	0.183224	0.40975	0.562412	0.238353	0.00930805	0.32878	0.0694893	0.527165	0.359858	1.97419	0.221525
ELTD1	0.0304726	0.0103635	0.0349453	0	0.0267598	0.00874498	0	0	0.0656788	0.0352327	0	0
LPHN2	0.0157861	0.00743965	0.0146663	0.0135907	0	0	0	0	0.0383065	0.0857209	0	0
RP11-475O6.1	0	0	0	0	0.0623069	0.008837	0	0	0	0	0	0.0137926
TTLL7	0.0109639	0.0592225	0.00914219	0.00627717	0.00979941	0.0655113	0.039336	0	0	0.0481324	0	0
PRKACB	0.476774	0.256567	0.127864	0.414515	0.545976	0.197421	0.0771457	0.30374	0.191007	0.317071	0.689593	0.341098
SAMD13	0.00332486	0.0233719	0.0114921	0	0.0136275	0.00930805	0	0.034957	0	0	0.0707489	0
DNASE2B	0.0238009	0	0	0.0101836	0	0	0	0.184201	0	0	0	0
RPF1	0.255323	0.352376	0.158218	0.318489	0.486923	0.228732	0.350753	0.287206	0.331834	0.206117	0.375644	0.356615
GNG5	3.08816	3.1452	3.01897	3.86571	2.57442	3.49015	2.37365	3.14035	4.29073	2.92374	1.65028	2.80021
CTBS	0.466884	0.381093	0.503149	0.473841	0.266801	0.191776	0.65337	0.645072	0.674553	0.481294	0.252119	0.685837
SSX2IP	0.0326934	0.0556523	0.0477681	0.0446958	0.256972	0.0753608	0.149266	0.0584748	0.066622	0.376365	0.076067	0.0651691
LPAR3	0.017769	0.0418142	0.0290689	0	0	0	0	0	0	0	0	0.053886
MCOLN2	0.140625	0.184456	0.0166827	0.150989	0.67247	0.384285	0.0411941	0.0467832	0	0.082665	0	0.0253306
WDR63	0.00714626	0	0	0.0337291	0	0.0164487	0	0	0	0.0738922	0	0
MCOLN3	0.0199543	0.00557646	0.0107684	0.0217916	0.0200668	0.0453287	0	0.0770236	0.0234471	0.582589	0	0
SYDE2	0	0.00402225	0	0	0.0101631	0	0	0	0	0.0135142	0.10587	0
C1orf52	0.341129	0.322326	0.257776	0.298697	0.361746	0.25048	0.215228	0.336179	0.430181	0.382136	0.427619	0.325949
BCL10	0.310178	0.34658	0.364644	0.369523	0.246135	0.262947	0.324989	0.50319	0.325632	0.514658	0.269003	0.315414
RP11-131L23.1	0.0122517	0.01815	0	0.0076946	0	0	0	0	0	0	0	0
DDAH1	0.013681	0.0480369	0	0.0501401	0.021107	0.0197127	0.0879454	0.0343484	0.0300149	0.0525538	0	0.0253306
CYR61	0.137186	0.162033	0.230741	0.0596257	0.206148	0.332188	0.100683	0.0160361	0.0879415	2.46158	0.326801	0.17673
ZNHIT6	0.115762	0.108251	0.0261167	0.115166	0.0750681	0.0641457	0.0323389	0.0445803	0.113082	0.235934	0.272388	0
COL24A1	0	0	0	0	0.446286	0	0	0	0	0.0303881	0	0
ODF2L	0.287109	0.157205	0.21262	0.197568	0.470581	0.244575	0.140379	0.203725	0.0919092	1.88587	0.987038	0.583232
RP4-612B15.3	0.00922321	0.0150762	0	0.0194667	0.0498383	0.0116235	0	0	0.0668618	0	0.0773377	0.0211942
SH3GLB1	1.28181	1.1821	1.84841	1.2358	1.11965	0.745219	1.73021	1.45249	1.96044	1.28924	1.46842	1.42168
2019-09-15	1.64687	1.63161	1.36817	1.49145	2.59273	1.54183	1.4164	2.85835	1.56823	1.97914	2.52154	1.26865
HS2ST1	0.115946	0.0822437	0.0375195	0.148203	0.0651089	0.0510024	0.18122	0.450831	0	0.169344	0.145723	0.0843151
LMO4	0.617489	0.614016	0.232914	0.673805	0.622284	0.367759	0.344482	0.605785	0.284745	1.75026	1.04313	0.289002
PKN2	0.45746	0.5111	0.43194	0.306385	0.555227	0.529043	0.774912	0.193018	0.91282	0.76193	0.79958	0.45208
GTF2B	0.526635	0.53268	0.513402	0.363966	0.608895	0.574445	0.261523	0.434387	0.673999	0.222218	0.724026	0.709809
CCBL2	0.0755374	0.209542	0.184699	0.0924124	0.231653	0.20089	0.0736854	0.0555499	0.111218	0.21485	0.0946634	0.0932775
RBMXL1	0.172584	0.173742	0.124584	0.114462	0.141458	0.116858	0.168605	0.0658546	0.0592891	0.114326	0.138247	0.0832899
GBP3	0.230813	0.105243	0.123258	0.174405	0.0333423	0.113527	0.100884	0.327594	0.182514	0.476757	0.0608761	0.111962
GBP1	0.817981	0.44789	0.512092	0.87319	0.113573	0.163858	0.396907	0.122447	0.884498	1.89682	0.128196	0.344912
GBP2	1.26171	0.365104	0.70859	0.941798	0.0451745	0.088154	1.00941	0.154747	1.86343	0.531634	1.07763	0.610175
GBP7	0.00450556	0.0155712	0	0.0595695	0	0.0194284	0	0	0	0	0	0
GBP4	0.491304	0.215758	0.177196	0.429975	0.0211256	0.281212	0.419987	0.112284	0.72756	0.320799	1.52156	0.288109
GBP5	0.163816	0.105723	0.171266	0.108169	0.0316657	0.0208992	0.219561	0.0637935	0.174388	0.0890097	0.722556	0.251331
LRRC8B	0.0751815	0.0738105	0.0446389	0.0905784	0.0772702	0.0430199	0.0499114	0.0940127	0.0869365	0.0344914	0.0524753	0.137505
RP5-1007M22.2	0.0245653	0.0379522	0.0303184	0.0110154	0.0164512	0.0513697	0	0.00746793	0.0537097	0.00850602	0.060086	0.0350192
LRRC8C	0.331621	0.213454	0.26557	0.106854	0	0.128994	0.101768	0.111106	0.17065	0.062549	0.274974	0.225974
LRRC8D	0.0830954	0.081258	0.169405	0.027994	0.274563	0.00946569	0.479252	0.134776	0.141921	0.0597442	0.148782	0.357187
ZNF326	0.280705	0.243641	0.27394	0.266786	0.573787	0.216508	0.277272	0.238663	0.345607	0.455742	0.721598	0.169171
RP4-665J23.1	0.00795699	0	0	0	0.0193098	0	0	0	0.027876	0.0159678	0	0
ZNF644	0.520724	0.390349	0.504018	0.366102	0.762573	0.452981	0.3247	0.243448	0.417381	0.498131	0.776745	0.773012
HFM1	0	0.0118011	0	0	0.0136736	0	0	0	0	0	0.0524753	0
CDC7	0.0225221	0.0277734	0.00983731	0.0225079	0.0274404	0	0	0	0	0.0418167	0.110298	0.056656
TGFBR3	0.0238374	0.0159718	0.0811132	0.0163963	0.144896	0.0230642	0	0	0.0234471	0.132969	0.065229	0
BRDT	0	0	0.0198933	0	0.00848112	0.0103165	0	0	0.0340483	0	0	0.0350192
EPHX4	0.0036619	0.00429344	0.00299373	0	0	0	0	0	0	0	0	0
BTBD8	0.00389503	0.0151271	0	0.0143763	0	0	0	0.0248164	0	0	0.0629667	0
KIAA1107	0.0112423	0.00666378	0.0058679	0.00311582	0.00971874	0.0138472	0	0.0228316	0.0314608	0.0604327	0	0.0211942
GLMN	0.0918684	0.109165	0.0137516	0.116236	0.159242	0.135521	0.0350488	0.0538246	0.183536	0.176019	0.489854	0.0832575
RPAP2	0.135285	0.177322	0.126016	0.0847181	0.430381	0.138858	0.265972	0.0575874	0.15891	0.332898	0.899442	0.134869
GFI1	0.00503306	0.016465	0.0149615	0	0.0716385	0.00982363	0.110824	0.0277256	0	0.0213559	0.68408	0.0832465
EVI5	0.249503	0.282621	0.261531	0.245057	0.345598	0.0609918	0.281906	0.146891	0.555754	0.40198	0	0.342403
RPL5	10.7114	14.5768	12.0723	8.53262	14.9397	16.8658	11.7834	9.17529	10.3552	14.2441	17.9679	9.1606
FAM69A	0.0731387	0.0778816	0.00299373	0.073786	0.350048	0.102141	0	0.1095	0	0.0719584	0	0.0700383
MTF2	0.402752	0.341824	0.210432	0.413948	0.46167	0.34897	0.34457	0.317681	0.192504	0.326204	1.21439	0.406171
TMED5	0.94483	0.538688	0.941328	0.749243	0.898976	0.616903	0.459745	0.675072	0.65112	0.645124	0.53141	1.08182
CCDC18	0.12125	0.120127	0.0602175	0.156166	0.203684	0.0180821	0.101889	0.0238107	0.0731056	0.087762	0.145723	0.076953
DR1	0.318022	0.555547	0.376203	0.434473	0.56265	0.288773	0.294301	0.195755	0.346203	0.41593	0.698484	0.551304
FNBP1L	0.075865	0.090777	0.00727599	0.0680965	0.190602	0.154762	0.0299383	0	0	0.183906	0.439739	0
BCAR3	0.0166996	0.057985	0	0.0491889	0.0293786	0.219974	0.0270655	0.0839897	0	0.0215437	0.105264	0.125702
DNTTIP2	0.843251	0.493496	1.01375	0.681587	0.6207	0.38743	0.518062	0.209778	0.559713	0.712946	0.643318	0.358007
GCLM	0.0840227	0.0949838	0.0294836	0.115971	0.0761078	0.048902	0.0608609	0.189587	0.0225715	0.233925	0.0699868	0.39773
ARHGAP29	0.0407759	0.0473877	0.119679	0.00982957	0.0292541	0.0322738	0.132673	0.0462947	0.349897	0.249436	0.060086	0
ABCD3	0.0531428	0.0995377	0.0772476	0.146984	0.0714786	0.0772779	0.188268	0.0413372	0.116846	0.162711	0.0526319	0.0255989
F3	0.0977178	0.085896	0.0590043	0.0671197	0.0340409	0.0787202	0.0500257	0.097891	0.0234471	1.07433	0.0666014	0.117721
LINC01057	0	0	0	0.0122723	0	0.0314193	0	0	0	0.0135142	0	0
SLC44A3	0.00265809	0.00582577	0.00459408	0.00279669	0.0123501	0.0300677	0	0	0	0	0.0825246	0
CNN3	0.15578	0.0869929	0.29927	0.0960654	0.139878	0.151565	0.0649354	0.0300658	0.0850777	2.16345	0.394163	0.225951
RP4-639F20.1	0.0120416	0	0	0.00283812	0.0103636	0.024682	0	0	0	0	0	0
ALG14	0.0469901	0.0713373	0.00727599	0.0739229	0.114153	0.0908822	0.0409136	0.0354693	0.0574954	0.0474757	0	0.0902369
RWDD3	0.0184949	0.0193222	0.0192336	0	0.0111504	0.0199022	0	0.00856816	0	0.021966	0	0.0211942
PTBP2	0.0623304	0.0931689	0.0575196	0.0237182	0.0567188	0.0648521	0.0453213	0	0.092962	0.133545	0.131754	0.139164
DPYD	0.634371	0.421913	1.12564	0.228565	0.0319588	0.0292551	1.09874	0.109434	0.483258	0.398032	0.620865	0.89074
SNX7	0.124878	0.123042	0.0415318	0.309522	0	0.0495226	0	0.0897584	0	0.0838687	0	0.0255989
LPPR4	0.00926366	0	0.00299373	0	0.019584	0	0	0	0	0.0605429	0	0
PALMD	0.0319872	0.0223753	0.0650655	0.0201576	0.029105	0.00988296	0	0.0567604	0	0.0312781	0	0
FRRS1	0.0300444	0	0	0.00237324	0	0.0192421	0	0.0891219	0	0.0128084	0	0.0978407
AGL	0.088942	0.0901275	0.0411544	0.0922196	0.219518	0.108619	0.0998333	0.118878	0.13122	0.189699	0.0526319	0.192092
RP5-884G6.2	0	0	0	0	0.100498	0	0	0	0	0	0	0
SLC35A3	0.13919	0.117715	0.0819378	0.0814393	0.183828	0.0807425	0.0780197	0.0905727	0.176041	0.103538	0.503658	0.178754
HIAT1	0.234594	0.265898	0.247977	0.225894	0.229523	0.162422	0.306987	0.529325	0.118731	0.278173	0.311964	0.493108
SASS6	0.0602278	0.0200018	0.0331368	0.0969474	0.0241613	0.0316938	0.0311061	0.0390753	0	0.0481645	0.152134	0.0717085
TRMT13	0.151537	0.160482	0.0566477	0.14386	0.144919	0.0761763	0.0270655	0.00575353	0.265756	0.172272	0.121752	0.0647221
LRRC39	0.00450556	0	0	0.0268997	0	0	0	0.032687	0	0	0	0
DBT	0.0395982	0.118357	0.0505908	0.0755498	0.127733	0.0258672	0.0381886	0.0642598	0.0867753	0.131722	0.290596	0.0567299
RP11-305E17.6	0.00589386	0	0	0.00809954	0	0	0	0	0	0	0	0
RTCA	0.261234	0.240904	0.206065	0.371468	0.185296	0.286817	0.273018	0.179538	0.393844	0.335757	0.301835	0.1866
CDC14A	0.113054	0.0492093	0.0244873	0.0589261	0.240987	0.114473	0.107281	0.0472255	0.0921623	0.117819	0.526968	0.106728
VCAM1	0.00668577	0.109572	0.0149687	0.0151548	0	0.0717003	0	0.00856816	0.0340483	0	0.0666014	0.0907992
EXTL2	0.0395972	0.109762	0.0150746	0.0594375	0.0958448	0.019896	0	0.0950935	0.114337	0.165708	0.0608761	0.0482707
RP4-549L20.3	0.010289	0.00863536	0.0121059	0	0	0	0.023084	0	0.027876	0.0268289	0	0
SLC30A7	0.267733	0.238595	0.28369	0.236679	0.521688	0.197798	0.390846	0.126167	0.239655	0.273973	0.446846	0.319784
DPH5	0.130737	0.134938	0.114539	0.126181	0.138456	0.0774296	0.119666	0.0657331	0.0346611	0.111125	0.290929	0.25552
AC093157.1	0.00733191	0	0	0	0.00914119	0	0	0	0.0272804	0	0	0
RP11-421L21.2	0.0136405	0	0	0	0	0	0	0	0	0	0	0
RP11-421L21.3	0.0277494	0.0390277	0	0.0226373	0.00563184	0	0	0	0	0.0398754	0	0
S1PR1	0.035858	0.0215429	0.0640822	0.0109714	0.0327271	0.144337	0.0270613	0.00746793	0	0.0702994	0.0707489	0
RNPC3	0.195243	0.106356	0.213465	0.124906	0.160997	0.0744197	0.22446	0.0961161	0.0784436	0.200293	0.196182	0.191475
AMY2B	0	0.0155467	0.0470339	0.0134857	0.0170105	0.00559382	0.0419008	0	0	0.017135	0	0
PRMT6	0.0501332	0.00421086	0.0327092	0.0428312	0.0419043	0.00843233	0.0854118	0	0.0542806	0.0606744	0.131559	0
NTNG1	0	0	0	0	0.00895215	0	0	0	0	0.0472141	0	0
VAV3	0.182168	0.221419	0.194921	0.183644	0.423953	0.898864	0.24302	0.150726	0.0922142	0.140666	0.203322	0.371091
VAV3-AS1	0.0110437	0.00500766	0.030248	0	0	0.017218	0	0	0	0	0	0
RP11-356N1.2	0	0	0.0454515	0	0	0	0	0	0	0	0	0
SLC25A24	0.515763	0.311952	0.460045	0.376044	0.277749	0.328713	0.338009	0.441435	0.754209	0.399052	0.167287	0.443011
RP11-483I13.5	0.00780766	0.00585247	0	0	0.0197757	0	0	0	0	0	0	0.0646822
FAM102B	0.345714	0.179914	0.201643	0.0886018	0.0432421	0.0431827	0.0425512	0.00856816	0.108911	0.0726913	0	0.312217
HENMT1	0.0727163	0.125646	0.0385984	0.0751569	0.0484028	0.0332142	0.0420918	0.15937	0.162062	0.0466527	0.0745962	0.145465
PRPF38B	1.75234	1.13051	0.953498	1.25895	1.54305	1.07657	0.776732	0.679528	1.66029	1.43744	1.47254	1.60439
STXBP3	0.432794	0.318974	0.528603	0.498391	0.272983	0.634961	0.56168	0.206119	0.64895	0.490781	0.477587	0.622003
GPSM2	0.0602722	0.0322675	0.0165414	0.0975569	0.0392844	0.0362205	0	0.0225978	0	0.127653	0.0714725	0.0137926
CLCC1	0.123997	0.0135801	0.0360531	0.140922	0.104106	0.140388	0.0712903	0.1701	0.0747362	0.160384	0.0961501	0.0620633
WDR47	0.0965959	0.0852184	0.0602569	0.096422	0.181928	0.193553	0.0411941	0.0523564	0.0606949	0.10958	0.274355	0.130666
TAF13	0.199294	0.160827	0.38005	0.048753	0.207883	0.100611	0.146874	0.126958	0.326076	0.342239	0.105107	0.110428
RP5-1065J22.8	0.0520837	0.0192462	0	0.0384067	0.0114697	0.0200578	0	0	0	0.036903	0	0.0349868
TMEM167B	0.278396	0.401302	0.485301	0.313178	0.353716	0.274867	0.43139	0.227409	0.31336	0.314378	0.487974	0.612766
SCARNA2	0.0342287	0.00543806	0	0	0.0191271	0.00843233	0.0305909	0	0.030295	0.00850602	0	0
C1orf194	0.115092	0.137824	0.0765798	0.400105	0.107515	0.080086	0.0314688	0.503286	0.167989	0.153256	0.0745962	0.161001
KIAA1324	0.0320836	0.013755	0.0252972	0.0114929	0.0232752	0.0239062	0	0	0	0.0683602	1.08884	0
SARS	0.469741	0.703908	0.352098	0.552291	0.585893	0.389656	0.515108	0.624715	0.705927	0.567274	0.658457	0.62925
CELSR2	0.0167352	0.0069317	0	0.0402519	0.00936049	0.0241679	0	0	0	0	0	0.0214317
PSRC1	0	0.0103988	0.0245114	0.0590652	0.00965372	0.0131912	0.0360836	0	0.033053	0.0161221	0	0
SORT1	0.337459	0.221581	0.376405	0.285503	0.269504	0.0116235	0.401421	0.203432	0.598039	0.107949	0.172804	0.465439
PSMA5	1.01038	0.996121	0.9045	1.27027	0.790639	0.907669	0.655464	0.728719	0.816548	0.768469	1.03623	1.08894
ATXN7L2	0.0128462	0.0167883	0	0.00521136	0	0.0241637	0	0	0	0.0414602	0	0
CYB561D1	0.0151335	0.0278783	0	0.00590207	0.0218376	0.0131912	0	0	0.0278214	0	0	0.026943
GNAI3	0.892733	0.669078	0.617729	0.948605	0.308397	0.464915	0.479829	0.589403	0.912837	0.768973	0.86099	0.855835
RP5-1160K1.3	0.02338	0	0	0.0109714	0	0.00946569	0.0323389	0	0	0.00854745	0	0
AMPD2	0.328771	0.247776	0.400669	0.170974	0.0209318	0.0774178	0.376942	0.174823	0.589596	0.34171	0.577301	0.348262
GSTM4	0.210649	0.215123	0.0236822	0.31808	0.049087	0.247891	0.00511051	0.106533	0	0.117638	0.0524753	0.136474
GSTM2	0.0199104	0.0122347	0.028584	0.0120337	0.0357512	0.0811044	0	0.0321157	0	0.0565518	0	0
GSTM1	0	0.00933618	0	0.00907386	0.00980575	0.0113225	0	0.00575353	0	0	0	0
GSTM5	0	0.0107256	0	0	0	0.00559382	0	0	0	0.073957	0	0
GSTM3	0.165611	0.0484722	0.0197225	0.0875705	0.0208076	0.0409444	0	0.0510069	0.0225715	0.369925	0.130835	0
RP11-195M16.3	0.0133093	0.015724	0	0	0	0	0	0	0	0	0	0
CSF1	0.0591587	0.490553	0.0672552	0.257879	0.00720471	0.0606687	0.0389864	0.310763	0.0314608	0.225867	0.268676	0.151979
AHCYL1	0.453706	0.288388	0.377982	0.323284	0.485953	0.273144	0.326423	0.342499	0.325476	0.950724	0.427494	0.303327
STRIP1	0.0842115	0.028136	0.045764	0.0709211	0.0843801	0.068445	0.0346991	0.0238107	0.036265	0.221207	0	0.227082
RP4-773N10.4	0	0.00833521	0.00299373	0	0	0	0	0	0	0.0650544	0	0
KCNC4	0	0.00748486	0	0.00237324	0.0192704	0.0107826	0	0.0305402	0	0.0494638	0.0791221	0
RP5-1074L1.1	0	0	0	0.0104362	0	0	0	0	0	0	0	0
RBM15	0.0701903	0.0601736	0.0874987	0.0937641	0.0720948	0.08049	0.0595062	0.0510774	0.0507614	0.0827788	0.0473317	0.210874
SLC16A4	0	0	0	0.0144184	0.01055	0	0	0	0	0.0615553	0	0
RP5-1074L1.4	0.00349251	0	0	0	0.00804861	0	0	0	0	0	0	0.0567299
LAMTOR5-AS1	0.00220144	0.0148851	0.0192494	0.0380281	0.0108071	0.00974402	0	0.0480921	0	0	0	0
LAMTOR5	1.48781	1.66129	2.04566	1.81123	1.85206	1.18116	1.88089	3.87868	2.27807	1.80279	1.22676	1.96669
RP11-284N8.3	0.00502301	0	0.00994663	0.0139088	0	0.0154174	0	0	0	0.216421	0	0.0978407
KCNA3	0.00563255	0.0489206	0.00846548	0.0115356	0.0200018	0.044971	0.0240624	0	0.0315613	0.121748	0.0590797	0.0866008
CD53	2.75459	2.97419	2.71319	3.10535	1.89351	1.19477	2.27771	1.89042	2.99614	1.40427	3.50105	2.78262
LRIF1	0.136358	0.174908	0.208262	0.11511	0.208694	0.195106	0.0587477	0.117939	0.120307	0.0839645	0.0585381	0.0897526
DRAM2	1.23867	0.784425	0.866667	1.30622	0.605434	0.571996	1.51505	1.20279	0.819451	0.44296	0.393732	0.75884
CEPT1	0.236041	0.234104	0.117488	0.263057	0.182678	0.233673	0.173837	0.226345	0.404166	0.114749	0.4056	0.135207
RP5-1180E21.5	0.0126725	0.0109306	0.0149437	0.0267437	0.00563184	0	0	0	0.0572799	0.021966	0	0
DENND2D	0.0709478	0.0785538	0.0955399	0.175117	0.130293	0.154492	0.231271	0.325243	0.0977631	0.0450445	0.719564	0.461152
CHI3L2	0.0175885	0.00851689	0.00730142	0.028382	0.0122305	0	0	0.040102	0.0278214	0	0	0
PIFO	0.0337103	0.131368	0.0220789	0.356576	0.048892	0.0281237	0.0692132	0.315476	0	0.010574	0	0.0537486
OVGP1	0.0189573	0	0.0181576	0.0133189	0.0505748	0.00946569	0	0	0	0.0136232	0	0
WDR77	0.195123	0.232056	0.190569	0.22293	0.187165	0.259338	0.173232	0.165001	0.12167	0.308671	0.329878	0.350788
ATP5F1	1.63389	1.80778	1.92728	2.12106	1.64468	1.63892	1.60104	1.54664	1.70906	1.45945	1.53907	2.0726
C1orf162	3.61503	3.27879	4.6204	2.52638	0.662392	3.7997	4.99483	1.00613	5.88449	1.86886	0.263122	2.89325
ADORA3	0.551834	0.180224	0.0990374	0.631321	0.0251817	0.154496	0.126195	0.222439	0.0272804	0.0330406	0	0.137561
RAP1A	2.25466	2.08275	2.45913	2.55001	1.11113	1.43962	1.9242	1.14389	2.22506	0.995443	1.71667	2.00894
LINC01160	0.00821273	0	0	0.00214858	0	0.0128454	0.00511051	0	0	0	0	0
FAM212B	0.0255959	0.0235535	0.129507	0.0152601	0.0187886	0.0200558	0.0339931	0	0.120166	0	0.0666014	0
DDX20	0.0746214	0.0771755	0.0152954	0.114576	0.0468502	0.209236	0.0659837	0.069935	0.0314608	0.0162549	0.118159	0.0616062
KCND3	0	0.00545182	0	0.00673277	0	0.0403051	0	0	0	0.0221632	0	0
CTTNBP2NL	0.922706	0.415961	0.178594	0.561683	0.128568	0.99202	0.314624	0.0963729	0.0274583	0.684394	0.206625	0.438806
WNT2B	0.0404161	0.0291303	0.0058679	0.0214897	0.0120314	0.035814	0	0	0	0	0	0.0255989
ST7L	0.0704051	0.0870145	0.103111	0.0762415	0.107237	0.0536428	0.0637673	0.0143217	0.0594465	0.201477	0.0705871	0.0940173
CAPZA1	1.84202	2.38721	1.94497	2.55782	1.61909	1.64169	2.18564	1.72714	2.34092	1.43536	1.0504	2.64748
MOV10	0.131763	0.0632592	0.0479671	0.0975787	0.0103165	0.0284953	0.0449152	0.00575353	0.144489	0.0400315	0.0629667	0.257488
RP11-426L16.3	0.0036212	0	0	0	0	0	0.00511051	0	0.0272804	0.0138048	0	0
RHOC	1.18326	1.08539	0.721416	1.08758	0.649782	1.78268	0.352917	0.827899	5.21545	1.60778	2.72716	1.59026
PPM1J	0.01336	0.0507038	0	0.00279669	0.151497	0.181368	0	0	0	0.0218771	0	0.026943
RP11-426L16.8	0.0200737	0.00243119	0	0.00515228	0	0.124009	0	0	0	0	0	0
RP3-522D1.1	0.177797	0.0548935	0	0.178367	0	0.21023	0	0	0	0	0	0.032317
SLC16A1	0.177423	0.0956746	0.133029	0.168994	0.0692421	0.0624771	0.0484637	0.0328495	0.0633115	0.477952	0	0.0855011
SLC16A1-AS1	0.0208894	0.00974526	0.0152681	0.0298081	0.0434984	0.0507205	0	0	0	0.0455188	0.0524753	0
LRIG2	0.0449328	0.0601111	0.0353918	0.020715	0.0780581	0.0376852	0.0657888	0	0.0741596	0.070721	0.0791221	0.209305
MAGI3	0.0118659	0.00748811	0.0366799	0.0109626	0.0136275	0.0589716	0	0	0	0.0442034	0.065229	0
PHTF1	0.220773	0.265318	0.13522	0.193462	0.437016	0.147158	0.0484503	0.146987	0.0519595	0.199289	0.846077	0.443968
RSBN1	0.156286	0.265462	0.140836	0.205697	0.374105	0.1801	0.146836	0.152035	0.144095	0.333165	1.4894	0.663809
PTPN22	0.35733	0.623833	0.314054	0.33653	0.343586	0.539413	0.21253	0.0981289	0	0.243934	3.33855	1.34478
BCL2L15	0.00221073	0	0	0.0271052	0	0	0	0	0.0351815	0.0388096	0	0
AP4B1	0.0395788	0.0262635	0	0.0355483	0.0442103	0.0253676	0.0505609	0.0285216	0.126161	0.0128084	0.11117	0.215646
DCLRE1B	0.0432316	0.0123593	0.0143005	0.0343069	0	0.0131937	0	0.0248249	0.0553343	0	0	0.0253306
RP5-1073O3.7	0.0347263	0.0150003	0.00476735	0.0157149	0	0	0	0	0	0	0.235582	0
HIPK1	0.289472	0.297168	0.336089	0.310286	0.374933	0.171461	0.585801	0.211619	0.395719	0.327653	0.628884	0.387818
OLFML3	1.03929	0.154617	0.0687266	0.988684	0.0542888	0.048149	0.00511051	0	0	1.47192	0.123062	0.306088
SYT6	0.0276362	0	0	0.0118033	0	0	0	0	0	0	0	0
TRIM33	0.246963	0.232038	0.180666	0.141677	0.260941	0.272308	0.313333	0.26003	0.481233	0.460869	0.710498	0.460127
BCAS2	0.830308	0.586413	0.531759	1.55764	0.627805	0.300416	0.340692	0.79312	0.726309	0.498852	0.610688	0.539476
DENND2C	0.00292254	0	0	0	0.00804861	0	0	0	0	0	0	0
NRAS	0.260449	0.279799	0.216304	0.237436	0.195607	0.11716	0.158208	0.545655	0.188	0.220042	0.135816	0.311904
CSDE1	1.70108	1.81518	1.67135	1.12895	2.20131	1.97593	1.77463	2.16653	1.91175	2.20306	1.91215	1.25554
SIKE1	0.214144	0.186268	0.246927	0.330091	0.190365	0.124825	0.280992	0.244105	0.245271	0.304673	0.451513	0.313132
TSPAN2	0	0.0428338	0.00918815	0	0.0393697	0.193059	0.175662	0.0184043	0	0	0.084156	0
RP4-666F24.3	0	0	0	0	0.021627	0	0	0	0	0	0.0629667	0
VANGL1	0.0402526	0.0119666	0	0.0309905	0.0198024	0	0	0	0	0.0693603	0	0.0554526
SLC22A15	0.0208056	0.0215588	0.0854747	0.0109714	0	0	0.144775	0.116116	0.0591587	0.0136232	0	0.148411
ATP1A1	1.26016	1.2724	1.50891	0.962698	0.572665	1.92159	0.945806	0.663767	1.98758	0.817937	1.69765	1.28406
CD58	0.516875	0.855568	0.664966	0.69755	0.0983936	0.48438	0.220985	0.540241	0.147763	0.328854	1.28452	0.359019
IGSF3	0	0.0176817	0	0	0.0101213	0	0	0	0	0	0	0.0340209
CD2	0.129071	0.257325	0.156846	0.275919	0.191496	0.261973	0.295918	0.030014	0.103454	0.404632	4.30689	2.32938
PTGFRN	0.0723135	0.0313986	0.0196733	0.105462	0	0	0.0423507	0.00575353	0	0.0499509	0	0.0567299
CD101	0.0256206	0.0406291	0.033266	0.030325	0.01124	0	0.0576564	0	0.112321	0	0	0.097725
TTF2	0.0927898	0.191634	0.066252	0.1205	0.13024	0.250491	0.0671911	0.0586235	0	0.169105	0.0526319	0.128038
VTCN1	0	0.0141654	0.00476735	0.0256852	0	0.00559382	0	0	0	0	0.0961501	0
MAN1A2	0.315033	0.219348	0.343588	0.160171	0.567871	0.407209	0.209594	0.133293	0.173718	0.413187	0.375411	0.440115
FAM46C	0.0455735	0.387124	0.122035	0.0490583	0.0604908	0.138762	0	0	0	0.145248	0.687144	0.0736013
GDAP2	0.122949	0.128798	0.163387	0.0884249	0.117742	0.0384836	0.114954	0.196824	0.145476	0.0549961	0.255861	0.151752
WDR3	0.0501291	0.109	0.0604959	0.113561	0.0844483	0.0513376	0.162504	0.0132215	0.075991	0.124979	0.2156	0.0734124
SPAG17	0.0326413	0	0	0	0	0.0128454	0	0	0	0.0322441	0	0.0646822
TBX15	0	0	0	0	0	0	0	0.0184105	0	0.0378869	0	0
WARS2	0.0781264	0.0717638	0.0730513	0.0938941	0.0436685	0.0748213	0.125015	0.00575353	0.0927257	0.150087	0.296625	0.135983
RP11-418J17.1	0.0206984	0	0.0146712	0.0112782	0.0260604	0	0	0	0.0498624	0.0168099	0	0
ZNF697	0.00978807	0.0043746	0.0471398	0.0109714	0.00683681	0	0	0.0395785	0.0307208	0.036075	0	0
PHGDH	0.0183339	0.0752069	0	0.0771982	0.0123501	0.0267547	0.0425512	0.0252604	0.0389299	0.0959742	0.0526319	0
NOTCH2	0.224624	0.133704	0.411208	0.0930045	0.421736	0.298554	0.96062	0.418055	0.616037	0.328158	0.509769	0.648694
RP11-439A17.7	0.360046	0.152407	0.17315	0.143624	0.234689	0.191989	0.282789	0.0144025	0.209275	0.124298	0.131597	0.209848
FAM72B	0.050129	0.00280587	0.0528167	0.0769888	0.0117666	0.008837	0.0834222	0.0269787	0	0	0.060086	0
RP11-439A17.9	0.00252451	0.00421086	0	0.00515228	0	0	0.0323389	0	0	0	0	0
FCGR1B	0.382845	0.178893	0.299132	0.340992	0	0	0.541075	0.0853887	0.103605	0.0808075	0	0.179011
RP11-343N15.5	0.965528	0.239395	0.531802	0.19269	0.766673	0.641365	0.90865	0.114942	0.679399	0.352842	0	0.643239
RP11-423O2.5	0	0	0.014437	0	0.0191923	0	0	0	0	0.0131691	0	0
RP11-782C8.1	0.00321786	0.00389812	0	0.0140122	0	0	0	0	0	0.0328396	0	0
RP11-782C8.5	0	0.00973361	0	0.0225869	0	0	0.0422744	0	0	0	0	0
RP6-206I17.1	0.00279823	0.00802111	0.0499373	0	0	0.00988296	0	0	0	0	0.0705871	0.0211942
RP6-206I17.2	0.00817059	0.00402225	0	0	0	0.0102084	0	0	0	0.0141911	0	0
FAM72D	0.0132941	0	0.00459408	0.0419958	0.0167167	0.0146701	0	0.0252604	0.0389299	0.0778671	0	0.0350192
LINC00623	0.00275171	0	0	0.00551925	0	0.00988296	0	0	0	0	0	0
AL592284.1	0.0870061	0.0892557	0.183262	0.173568	0.0258096	0.0553473	0.26185	0.356933	0.0942642	0.0978335	0	0.31964
RP11-640M9.1	0.100694	0.143002	0.0810562	0.151165	0.0410803	0.0994451	0.369414	0.134964	0.149736	0.224678	0.647467	0.700141
NBPF9	0.0326259	0.0593091	0.140264	0.0277922	0.0524616	0.0138472	0.135344	0.176065	0.112357	0.0531237	0.0696709	0.135342
PDE4DIP	0.263967	0.234706	0.148387	0.424203	0.142952	0.476217	0.340093	0.538667	0.0834909	0.287768	0.282659	0.235482
AL590452.1	0.0173546	0.00802111	0.0287611	0.0284735	0	0.0270019	0	0	0.0351815	0.0707037	0	0.0651691
RP11-326G21.1	0	0	0.0138054	0.0125033	0.0171347	0.0187869	0.0369734	0	0	0	0	0
NOTCH2NL	0.337377	0.35953	0.596795	0.335206	0.633211	0.681841	0.424332	1.14784	0.872871	0.607927	0.74763	0.397746
RP11-458D21.5	0	0	0	0.00419768	0.0211615	0	0	0	0	0	0	0
NBPF10	0.323809	0.263015	0.668557	0.127628	1.07539	0.383024	0.871432	0.430881	0.802956	0.488197	0.880144	0.627347
RP11-458D21.1	0	0	0	0.0112834	0.00563184	0.00982971	0	0	0	0.010574	0.0676599	0
TXNIP	2.56765	2.60717	3.4298	1.53657	1.71312	1.8989	11.6445	3.51539	9.62302	3.60231	12.1507	8.79758
POLR3GL	0.536537	0.545075	0.363003	0.515809	0.430036	0.336838	0.632358	0.883696	0.757733	0.329849	1.08307	0.884437
ANKRD34A	0	0.00748811	0	0	0	0	0	0	0	0.0271941	0	0
RP11-315I20.1	0.0094378	0.00389812	0.0107684	0	0.0341271	0.0128454	0	0	0.0351815	0.0359758	0	0
LIX1L	0.132821	0.145403	0.119925	0.102132	0.228109	0.157287	0.175797	0.197135	0.203223	0.22336	0.234936	0.244157
RBM8A	1.41895	1.75648	1.3791	1.86631	1.89014	1.40694	1.53655	1.15433	1.3909	1.94465	2.57834	1.77144
PEX11B	0.0516417	0.110492	0.0256607	0.032759	0.208983	0.030829	0.127399	0.177566	0.111612	0.151469	0.153718	0.0690401
ITGA10	0	0.013046	0.00918815	0	0	0.0105827	0	0	0	0	0.0608761	0.0728231
ANKRD35	0.00283098	0.0429288	0	0.0376385	0.0268018	0	0.0653648	0.0510428	0	0.0488498	0.0590797	0.0488118
PIAS3	0.0301768	0.0233172	0.05472	0.0279835	0.11648	0.0155344	0.00511051	0	0	0.231408	0.122046	0.0255989
NUDT17	0.027557	0.0179477	0	0.0151223	0.188213	0.0188779	0	0	0	0.0757818	0	0
POLR3C	0.134221	0.0751802	0.0385107	0.16856	0.11713	0.0299072	0.0660922	0.0717422	0.25985	0.111595	0.117003	0.0632139
RNF115	0.364735	0.289905	0.276438	0.351597	0.394834	0.558558	0.310805	0.203465	0.417973	0.27902	1.24874	0.620522
CD160	0.0295238	0.00658508	0.0172744	0.0172843	0.00895215	0.0298182	0	0	0	0.017135	0	0.145978
PDZK1	0	0.00545182	0	0	0.00683681	0	0	0	0	0	0.176736	0
GPR89A	0.0434757	0.0531923	0.0198784	0.140094	0.0672835	0.100425	0.134497	0.11146	0.0903195	0.0621837	0.0526319	0.0488118
GPR89C	0	0.00621983	0	0	0.0121829	0	0	0	0	0	0.0473317	0
NBPF11	0.020425	0	0.0338645	0	0.0120202	0	0	0	0	0.0328396	0.0473317	0.0211942
NBPF12	0.0482462	0.0307782	0.0388421	0.00421749	0.10076	0.109665	0.0454504	0	0.110661	0.0286972	0	0
PRKAB2	0.0524718	0.0625214	0.0184711	0.0694194	0.0535706	0.021011	0	0.0713725	0.0383065	0	0	0.181773
RP11-337C18.8	0.0357924	0.00402225	0.0332152	0	0.0585488	0.0194284	0.0270613	0.0300971	0	0.0547116	0	0.046295
FMO5	0.0298442	0.0419439	0.057533	0.0184189	0.0384141	0	0.0879227	0	0.0346611	0.0162549	0	0
CHD1L	0.185643	0.284936	0.243395	0.209756	0.424986	0.156137	0.211453	0.0980601	0.057971	0.147763	0.122046	0.147229
BCL9	0.0391443	0.0832764	0.0256762	0.0136777	0.0541888	0.0328759	0	0	0	0.187454	0.131488	0
ACP6	0.00855892	0.0363159	0	0.00991685	0.0336716	0.0238286	0	0	0	0.0129963	0.225662	0.121094
GPR89B	0.00506019	0	0	0.00376113	0.0111504	0	0	0	0	0	0	0
NBPF24	0	0	0	0	0.022238	0.0126257	0	0	0	0	0.0961501	0
NBPF14	0.100488	0.0555127	0.158185	0.019637	0.0807814	0.0810441	0.0725953	0	0.351438	0.074177	0.0473317	0.0482707
NBPF20	0.00848989	0.0155293	0.00299373	0.00279678	0.0710013	0.0138472	0	0	0.0225715	0	0	0
NBPF15	0.00964317	0.0098909	0.0201331	0.0117274	0.0322233	0.018262	0	0	0	0.0416319	0	0
RP11-666A1.5	0	0	0	0.00380872	0.00563184	0.008837	0	0	0	0	0	0.0632139
NBPF16	0.00937584	0	0.0107578	0.00279669	0	0	0	0	0	0.0548867	0	0
RP11-14N7.2	0.0223095	0.0241411	0.0410603	0.0604783	0.0425684	0.0483855	0	0.0225978	0.0370392	0.304953	0.285915	0.170977
RP11-403I13.5	0.00668577	0	0	0.0314333	0	0.00982363	0	0	0	0	0	0
RP11-403I13.4	0.00758662	0.00868492	0	0.00754953	0	0	0	0	0	0	0	0
RP11-403I13.8	0.0204991	0.0309667	0.00950372	0.0296592	0.0186824	0.0105827	0.0270613	0	0.0334963	0.0328396	0.0526319	0.112875
FAM72C	0	0	0	0.0240719	0	0	0	0	0	0	0	0
RP11-277L2.4	0.0144089	0.0354826	0.00846548	0.0507151	0.011753	0.0124524	0	0.0604033	0	0.0403941	0.178777	0.350136
RP11-277L2.3	0.0163625	0.014879	0.0845204	0.0252315	0.0101495	0.0609214	0.133989	0.0849143	0	0	0	0
RP11-277L2.5	0	0	0	0	0	0	0	0.062053	0	0	0	0
RP11-353N4.1	0.00794666	0.0239341	0	0.0353036	0	0.0124524	0	0.245721	0	0	0	0
RP11-353N4.5	0	0	0.00299373	0.0355552	0	0	0	0	0	0	0	0
FCGR1A	1.45816	0.604094	0.869382	2.06226	0	0.0102084	0.884819	0.507533	0.251886	0.236564	0	0.522175
HIST2H2BF	0.00558063	0.00880786	0.00476735	0.0131742	0.0120123	0.0112927	0	0	0.0222489	0	0	0
RP11-196G18.3	0.00315175	0.00545182	0	0.00279678	0	0	0.027994	0	0	0	0	0.129268
RP11-196G18.23	0.00660734	0	0.0179238	0.00586465	0.00563184	0.0120146	0.0422744	0	0	0	0	0
HIST2H2AA3	0.273965	0.240221	0.304461	0.139698	1.01351	0.316353	0.433017	0.298493	0.747787	0.229594	0.17353	0.0753177
RP11-196G18.24	0	0.009995	0.0182482	0.0164092	0.0161587	0	0	0	0	0	0	0.0742832
HIST2H2BE	0.190664	0.177237	0.0587114	0.0362383	0.856439	0.273455	0.205425	0.150695	0.178738	0.120614	0.0696709	0.0749428
HIST2H2AC	0.253923	0.193074	0.365797	0.452498	0.500008	0.201553	0.259975	0.0611049	0.254148	0.532081	0.517218	0.333549
HIST2H2AB	0	0.00658508	0	0.00992294	0	0.0222348	0	0	0	0	0	0
BOLA1	0.0623432	0.053525	0.0211111	0.0511837	0.155532	0.0284406	0.198634	0.0978852	0	0.101912	0.065229	0.0275853
SV2A	0	0	0	0	0	0.0266925	0	0	0	0.049843	0.236509	0
SF3B4	0.287476	0.377276	0.262869	0.295119	0.448061	0.301066	0.271573	0.222208	0.314581	0.399876	0.412363	0.305154
MTMR11	0.0255891	0.0284413	0.452398	0	0.0116805	0	0.329391	0.00746793	0.636267	0.162795	0	0.0839324
OTUD7B	0.0380071	0.0211627	0	0.017958	0.00563184	0.0291038	0.023084	0	0	0.228901	0	0.170664
VPS45	0.095031	0.0657754	0.0676241	0.201068	0.200943	0.0390186	0.292765	0.0295642	0.113992	0.124873	0.298856	0.174049
PLEKHO1	1.43947	1.21731	0.599684	0.996718	0.677178	1.97635	0.754203	0.880627	0.646934	0.899663	0.471468	1.18278
ANP32E	0.431622	0.503208	0.271087	1.07133	0.214103	0.622167	0.348018	0.232952	0.285008	0.586201	3.27742	0.713642
APH1A	1.04446	0.738118	0.621737	1.0458	0.877562	1.22449	0.526333	0.964476	0.514651	0.855049	0.771379	0.601008
C1orf54	1.53443	0.92405	0.21634	1.90785	0.044214	7.31527	0.161108	0.326048	0.101049	0.71804	0	0.682955
C1orf51	0.0182265	0	0	0.023855	0.0117666	0	0	0	0	0.0138048	0	0
MRPS21	1.28949	1.35876	1.02232	1.73778	1.5092	1.22185	2.07616	1.04567	1.40071	1.32016	1.45745	1.35365
PRPF3	0.106966	0.082963	0.107432	0.126428	0.0819657	0.0305019	0.156903	0.0942885	0.133085	0.206941	0.176996	0.0600876
RPRD2	0.14228	0.0959004	0.100901	0.071502	0.256872	0.191586	0.258429	0.0926517	0.125904	0.129086	0.26294	0.272194
TARS2	0.0838235	0.0812959	0.0260159	0.126055	0.027651	0.0419077	0.0453213	0.0374877	0	0.100668	0	0.0940173
ECM1	0.339437	0.0808562	0.310292	0.0575555	0.256924	0.291835	0.0491608	0.0149359	0.369902	4.1283	0.425054	0.27977
LINC00568	0	0.00761966	0	0.0225869	0	0	0	0	0	0.0543943	0	0
RP11-54A4.2	0.00815234	0	0	0	0	0	0	0	0	0	0	0.0211942
ADAMTSL4	0.0647862	0.0525488	0.081053	0.024607	0	0.0152623	0.0903645	0.0373396	0.0941935	0.210822	0	0.0736013
ADAMTSL4-AS1	0.0165083	0.00341346	0	0.0108958	0.0103165	0	0	0	0	0	0	0.026943
MCL1	7.47185	5.25544	10.4883	3.97238	6.75892	5.08948	7.83759	1.74987	5.05784	7.30462	4.92061	7.67716
ENSA	1.28682	1.49599	1.12056	1.51785	1.52541	2.99321	0.901342	1.19489	1.14873	1.13341	2.05481	1.3245
GOLPH3L	0.0485948	0.09404	0.0196482	0.083692	0.0854279	0.0860306	0	0.0323788	0	0.0705258	0	0.0350192
HORMAD1	0.00545379	0	0	0	0	0	0.0861986	0	0.0272804	0	0	0
CTSS	11.3352	5.31536	22.7496	6.77128	4.31536	3.30437	26.6302	18.8066	28.4101	7.63671	0.965686	13.0839
CTSK	0.0355144	0.0103506	0.0351982	0.02515	0.0450209	0.0222821	0.00511051	25.2868	0	0.528131	0	0.0349868
ARNT	0.133626	0.121119	0.133932	0.101735	0.14221	0.101467	0.136032	0.140253	0.0278214	0.142068	0.130073	0.155738
SETDB1	0.0800075	0.095647	0.0994743	0.0458489	0.103796	0.069228	0.1881	0.0961073	0.0562973	0.150549	0.231375	0.110007
CERS2	0.213226	0.247881	0.221628	0.202075	0.440775	0.15943	0.133973	0.262104	0.122932	0.440248	0.493924	0.495394
ANXA9	0	0.00371742	0	0.032346	0.00720471	0.00843233	0	0	0	0	0	0
FAM63A	0.0253023	0.0298729	0.0189663	0.0574456	0.0122305	0.0231615	0	0.0372364	0	0.0228135	0	0.046793
PRUNE	0.0329788	0.00494093	0.0322835	0.0172394	0.0281633	0	0	0.0343919	0.0234471	0.0607921	0.132349	0
BNIPL	0.0235725	0	0.00784188	0.0124131	0	0.0211163	0	0	0	0	0	0
C1orf56	0.843048	0.644573	0.463023	0.748776	0.341	0.447708	0.79489	0.68922	1.20636	0.543303	0.885536	1.22454
CDC42SE1	1.18165	0.983208	1.11176	1.31641	0.563704	0.860006	1.46551	0.656865	1.3461	1.25412	1.90039	1.53585
MLLT11	0.137745	0.14349	0.0154758	0.0971154	0.0737287	0.0188175	0.04041	0.0299107	0.0914226	0.491353	0.141336	0.18679
GABPB2	0.108104	0.0658094	0.043965	0.0648416	0.107026	0.00467954	0.0939141	0.0403825	0.0698426	0.0590463	0.112561	0.22605
SEMA6C	0.0065223	0.0141439	0.0182482	0.0167061	0	0.00843233	0	0.0114158	0	0	0	0
TNFAIP8L2	0.345501	0.555142	0.207736	0.504993	0.0371703	0.0862466	0.545028	0.202653	0.646936	0.0952146	0.0741037	0.245336
SCNM1	0.530356	0.538757	0.439415	0.41234	0.437184	0.484139	0.487638	0.329375	0.371327	0.263495	0.28724	0.296197
LYSMD1	0.00221603	0	0	0	0.0230551	0	0	0	0	0.0240881	0	0.0211942
VPS72	0.15285	0.161514	0.0893249	0.230343	0.054105	0.195645	0.373278	0.0592002	0.171685	0.225178	0.241717	0.0890468
PIP5K1A	0.160011	0.0974778	0.0996447	0.0929239	0.305084	0.0485148	0.0776232	0.0597106	0.154455	0.173816	0.119414	0.21171
PSMD4	0.94334	1.10671	0.883235	1.22632	0.837835	0.986731	1.03147	0.914081	1.39863	0.856143	0.931201	0.953275
RP11-126K1.2	0.036398	0.0339625	0.0182558	0.0262646	0.0314699	0	0.0316881	0	0.122616	0	0	0.0423883
ZNF687	0.0323033	0.0156751	0.0253424	0.0355787	0.0654985	0.0852568	0.00511051	0.0184105	0.0264794	0.0567839	0.112561	0.0646822
PI4KB	0.181411	0.182031	0.142177	0.181332	0.168156	0.295214	0.060604	0.137587	0.306043	0.352809	0.291567	0.258895
RFX5	0.208565	0.197427	0.130441	0.203383	0.155941	0.223574	0.248966	0.0642592	0.121555	0.231569	0.211974	0.0705225
RP11-126K1.6	0.0789827	0.0914188	0.0134621	0.076604	0.064328	0.0572375	0.0445526	0.0297919	0	0.0256423	0	0.106844
SELENBP1	0.00815696	0.0167164	0	0.0202183	0.0290271	0.0173532	0	0	0	0.11292	0.0590797	0.032317
PSMB4	0.471915	0.76961	0.45249	0.654172	0.720318	0.770375	0.598844	0.638167	0.631086	0.709816	0.687525	0.601046
POGZ	0.242302	0.183199	0.191248	0.181405	0.37797	0.317701	0.0747079	0.093816	0.142521	0.622719	0.140706	0.123171
CGN	0	0.0329316	0	0.0481767	0	0.0105827	0	0	0	0	0	0
TUFT1	0.0088943	0.0169573	0.0374976	0.0320938	0	0.0333222	0	0	0	0.0624114	0	0.0916809
SNX27	0.390045	0.229979	0.612752	0.219076	0.126043	0.167487	0.647436	0.432767	0.876922	0.362974	0.428648	0.32485
RIIAD1	0.00396852	0.00622545	0	0.038419	0	0	0	0	0	0	0	0
MRPL9	0.317955	0.36615	0.293295	0.359754	0.314553	0.30942	0.225471	0.199077	0.368398	0.365252	0.574218	0.558558
OAZ3	0.0233358	0.00278289	0	0	0	0.0210718	0	0.0241578	0	0	0	0
TDRKH	0.0392966	0.00867678	0	0.0448113	0	0	0	0.00575353	0.0581163	0.0235319	0.125139	0
RP11-98D18.9	0.0071094	0.0157217	0.0172574	0.0150243	0.0258776	0	0	0	0	0	0	0
LINGO4	0	0	0	0	0	0	0	0	0	0	0.203793	0
RORC	0	0.0175957	0	0.0119978	0	0	0	0.0217326	0	0	1.97586	0
THEM4	0.0478514	0.101902	0.0137621	0.110844	0.116548	0.237871	0	0.123229	0.103256	0.0618577	0.413732	0.142154
S100A10	3.79201	9.09214	16.5917	7.88412	1.60167	7.56416	15.2357	4.02321	8.42575	3.92651	2.73754	8.16404
S100A11	14.5259	15.8827	18.3063	21.8314	3.31089	5.39215	20.02	26.3471	23.0217	8.24164	3.79597	12.8543
TCHH	0.393673	0.033043	0.00598746	0.206874	0	0.159604	0	0	0.027876	0.0829584	0	0.21952
LOR	0	0	0	0	0	0.0594735	0	0	0	0	0	0
S100A9	2.02202	6.81809	112.668	4.76222	0.32391	0.227684	136.816	5.80014	10.8048	25.5402	0.312905	42.6545
S100A12	0.00749709	0.131986	9.12227	0.0266129	0.0555736	0	9.87204	0	0.103438	2.12894	0.0524753	5.42354
S100A8	0.610198	3.47433	63.8044	1.83671	0.166728	0.166046	93.1145	1.3583	4.47267	12.9831	0.416392	34.1485
S100A6	5.17873	14.6349	34.0596	12.5038	8.24839	3.708	53.6185	35.0063	36.2343	12.5259	4.61116	19.2451
S100A4	8.02267	14.5814	33.5626	12.6622	3.16353	0.909691	58.0973	2.85531	51.0263	10.2939	11.5281	25.4292
S100A3	0.00397253	0.00466267	0	0	0.0188682	0	0	0	0	0	0	0
S100A2	0.0177675	0.172822	0.0259451	0.476215	0.0200565	0.0842414	0.114213	0.412222	0	0.0518853	0	0.032317
S100A16	0.156785	0.128745	0.183336	0.100816	0.102439	0.135949	0.0352995	0.0808667	0.10439	0.751542	0.076067	0.0211942
S100A14	0.00522585	0.0378472	0	0.0231477	0	0	0	0.0445699	0	0	0	0
S100A13	0.335554	0.305178	0.296359	0.437285	0.339794	0.285711	0.342296	0.800521	0.149657	3.14579	0.405783	0.346409
S100A1	0	0.0335895	0	0.00835573	0	0	0	0.0690636	0.0542806	0	0	0.0632139
RP1-178F15.4	0.00506753	0	0	0.00299944	0	0	0	0.0328495	0	0	0	0
CHTOP	0.369926	0.366454	0.220104	0.454585	0.298749	0.194584	0.285162	0.219609	0.342725	0.456306	0.579152	0.675454
SNAPIN	0.399707	0.396956	0.259285	0.528022	0.520708	0.267428	0.363173	0.295909	0.370079	0.210654	0.270878	0.400982
ILF2	0.730357	0.898975	0.595655	1.05918	0.8391	1.02939	0.460693	0.424291	0.559755	0.957078	0.796151	0.442988
NPR1	0.00221603	0	0.00299373	0	0	0.00946569	0	0	0	0	0	0
INTS3	0.146334	0.103177	0.108938	0.0469477	0.133714	0.211125	0.148131	0.0741345	0.119642	0.236072	0.259309	0.098422
SLC27A3	0.0897185	0.16135	0.168205	0.0432961	0.0850465	0.0501094	0.368912	0.1811	0.313521	0.0715476	0	0.37343
GATAD2B	0.25059	0.252903	0.273623	0.142101	0.475571	0.265454	0.207325	0.050428	0.0940986	0.455925	0.250845	0.27895
DENND4B	0.204686	0.0987315	0.091183	0.146744	0.178526	0.0954505	0.131057	0	0.274891	0.0795051	0.12997	0.279625
CRTC2	0.110877	0.120463	0.0331537	0.13296	0.232896	0.134654	0.11808	0.100981	0.217841	0.0303041	0.121435	0.146693
SLC39A1	0.442557	0.454715	0.432381	0.574119	0.321378	0.208246	0.410937	0.674681	0.127716	0.687791	0.419978	0.216427
CREB3L4	0.0174501	0.0740961	0.06462	0.0172995	0.0703046	0.0209826	0.0419008	0.0340137	0.090599	0.0266132	0	0.113057
JTB	1.48577	1.60028	1.52885	1.47729	2.42572	1.26396	1.63848	2.22225	1.6089	1.62108	2.32485	1.95059
RP11-422P24.11	0.00620676	0	0	0	0	0	0.0449152	0.027096	0	0	0	0
RAB13	0.679255	0.322873	0.793663	0.396827	0.384653	0.36148	0.157661	0.927335	0.0713072	0.81443	0.181174	0.22806
RPS27	38.4873	57.4888	51.5747	40.0905	76.5829	63.5273	70.4664	37.1655	66.5809	48.4483	69.924	57.4716
TPM3	4.57745	4.10269	5.69065	4.54147	3.58438	6.45746	3.68447	1.61399	6.20593	3.42638	5.07305	5.36713
C1orf43	1.18298	1.14228	0.815103	1.49721	1.107	0.858253	0.912657	1.39716	1.18991	0.909396	1.39611	1.05478
UBAP2L	0.323927	0.156713	0.305313	0.244119	0.308495	0.314441	0.184111	0.181411	0.277154	0.318708	0.1349	0.301608
HAX1	0.510207	0.7705	0.480401	0.67826	0.71133	0.653894	0.635756	0.302242	0.772407	0.485961	1.14331	0.66213
ATP8B2	0.0161928	0.027355	0.00846548	0	0.101265	0.0353181	0	0	0.0278214	0.261059	0.128699	0
RP11-350G8.5	0.0299252	0.00861315	0.0114921	0.0129115	0.0262679	0	0	0.0184043	0	0.0362321	0	0
IL6R	0.451922	0.197096	0.381606	0.189974	0.13356	0.491414	0.0839783	0.145957	0.216619	0.328468	0	0.246833
SHE	0.00543389	0	0.00459408	0.00338726	0	0.0637302	0	0	0	0	0	0
TDRD10	0	0	0	0	0	0.0345849	0	0	0	0	0	0
UBE2Q1	0.233904	0.161997	0.284105	0.186154	0.275607	0.339055	0.490836	0.154881	0.263098	0.215808	0.367607	0.194445
ADAR	0.684464	0.564788	0.729456	0.570156	0.77745	0.497923	0.635795	0.337426	1.00923	0.588529	0.929342	1.61884
KCNN3	0	0.0129446	0.00459408	0	0	0.00843233	0.0422744	0	0	0	0	0.0340209
PMVK	0.622477	0.283007	0.418274	0.743451	0.248685	0.2624	0.485811	0.564952	0.972378	0.460321	0.0806205	0.379418
RP11-307C12.13	0.0190057	0.00341346	0	0.0401243	0	0.0374638	0	0	0	0	0	0
PBXIP1	0.237691	0.255153	0.179794	0.122527	0.289301	0.403956	0.196227	0.214567	0.350407	0.401516	2.59917	0.505642
PYGO2	0.0120872	0.0246915	0	0.0576167	0.0955478	0.028641	0.113895	0.0225978	0.100319	0.0585176	0.153273	0.0557588
RP11-307C12.12	0.00649534	0.00735789	0	0.00299944	0.0479871	0.0164331	0	0.00746793	0	0	0.0526319	0
SHC1	0.145044	0.0530395	0.151271	0.145114	0.0888948	0.0633611	0.220907	0.0740213	0.116187	0.466126	0.102709	0.105509
CKS1B	0.300291	0.41705	0.209797	2.36294	0.743622	0.39896	0.182864	0.134922	0.611253	0.370938	0.139208	0.534899
FLAD1	0.120912	0.258068	0.097123	0.10353	0.110195	0.275426	0.17959	0.251176	0.138654	0.149347	0	0.159008
ZBTB7B	0.0966902	0.0803426	0.0769941	0.0854407	0.0430481	0.0528363	0.075017	0.0738223	0.231465	0.025316	0.298128	0.0393915
RP11-307C12.11	0.00522585	0	0.00918238	0	0	0	0	0.0144025	0	0	0	0
ADAM15	0.120487	0.0456803	0.232439	0.103391	0.0300468	0.174444	0.218708	0.184362	0.0588365	0.216522	0.121505	0.0255989
EFNA4	0.0161822	0.0415638	0.0316588	0.0236467	0.0867738	0.0455151	0.0240624	0.00746793	0.0351815	0.0541285	0.0773377	0
EFNA3	0	0.0219486	0	0.0124536	0	0	0.0535742	0	0	0	0	0
EFNA1	0.0220189	0.0611077	0.0125853	0.0864779	0.019898	0	0	0.0874993	0	0	0.0961501	0
SLC50A1	0.351655	0.357064	0.134566	0.323687	0.382868	0.257421	0.116703	0.385806	0.21334	0.281545	0.384705	0.204294
DPM3	0.537073	0.45414	0.372988	0.508474	0.318422	0.263609	0.582387	0.634907	0.541085	0.654872	0.952853	0.635648
KRTCAP2	0.92707	1.29589	0.93792	1.16861	1.37962	0.775248	1.35121	1.18672	1.37506	1.45149	0.765281	1.22989
MUC1	0.032603	0.522093	0.0524	0.727897	0.0433961	0.166207	0.44336	0.997201	0.110437	0.122523	0	0.217419
THBS3	0.0431636	0.0109346	0.0390066	0.0132103	0.0267704	0.0113225	0.0339931	0	0	0.0517805	0.0666014	0
RP11-263K19.4	0	0	0	0	0	0.0401341	0	0	0	0.0223522	0	0
MTX1	0.334061	0.277637	0.327367	0.320417	0.202402	0.294626	0.278245	0.562887	0.416434	0.242799	0.167287	0.467754
GBA	0.163186	0.10396	0.115787	0.29993	0.0559571	0.06199	0.133661	0.552477	0.190214	0.16283	0	0.0393915
FAM189B	0.0529338	0.097186	0.0391041	0.0464103	0.031316	0.0291857	0.0339931	0.0144025	0	0.0901608	0.0707489	0.0349868
SCAMP3	0.221117	0.198768	0.0833407	0.229065	0.293713	0.105375	0.10668	0.134575	0.0962161	0.108603	0.0707489	0.0940611
CLK2	0.0700124	0.0763987	0.0432048	0.0384951	0.135399	0.0113225	0.089967	0.127794	0.0501097	0.190487	0	0.123171
HCN3	0	0	0	0.00765864	0	0.0109833	0	0	0.0541328	0.0162549	0.0526319	0.0211942
FDPS	0.376052	0.58511	0.374448	0.678312	0.553117	0.57668	0.303116	0.445018	0.581611	0.394478	0.627463	0.399362
RUSC1-AS1	0.00503306	0.00573279	0	0	0	0	0	0	0	0	0	0
RUSC1	0.104816	0.107287	0.0572756	0.188752	0.0602744	0.107588	0.0722914	0.0896608	0.230523	0.104608	0.186673	0.110877
ASH1L	0.79901	0.577091	0.542544	0.309964	0.825633	1.06453	0.616641	0.375026	0.451045	1.11491	1.48849	0.64772
MSTO1	0.0408389	0.0179856	0.00779035	0.0391196	0.0517661	0.0144912	0.100721	0.071529	0.0274583	0	0.0825246	0.0393915
YY1AP1	0.179091	0.15246	0.200266	0.0947256	0.157406	0.185086	0.192038	0.108643	0.0929284	0.287376	0.0629667	0.235194
DAP3	0.627503	0.555583	0.444787	0.544565	0.570906	0.531208	0.648601	0.201181	0.363783	0.379182	0.252647	0.455875
GON4L	0.248358	0.224146	0.166241	0.283777	0.312088	0.273296	0.157754	0.155331	0.150115	0.624133	0.423927	0.246689
SYT11	0.16445	0.116955	0.0693339	0.0980847	0.0284458	0.11265	0.0339931	0	0.114818	0.197328	0.126105	0.165137
RIT1	0.422186	0.268548	0.614184	0.517659	0.119478	0.156849	0.445839	0.555935	0.205013	0.454406	0.333864	0.634069
KIAA0907	0.16239	0.135781	0.103865	0.104175	0.295799	0.12313	0.228669	0.0559961	0.0907481	0.123201	0.348719	0.314611
ARHGEF2	0.220857	0.141302	0.25013	0.195218	0.159841	0.179125	0.507658	0.302432	0.126559	0.340344	0.0741037	0.321628
SSR2	2.43408	2.82582	2.54792	2.19201	2.9133	2.36036	2.01156	1.72542	1.98904	4.99247	3.63293	2.7622
UBQLN4	0.0533601	0.0742191	0.0151965	0.0562162	0.0951416	0.0837042	0	0.115635	0.0690747	0.159776	0.065229	0.0478135
LAMTOR2	1.55744	1.52103	1.54271	2.02422	0.714795	0.898553	2.25681	1.05642	2.04945	0.855712	0.820472	1.87425
RAB25	0.0349292	0.0308344	0.0115057	0.120338	0	0.051865	0	0.126364	0	0.0302338	0	0.0340209
MEX3A	0.0127181	0	0.00299373	0	0	0.0200315	0.0265776	0	0	0.220174	0	0.0916809
LMNA	3.51733	2.06777	1.70324	1.32029	0.593269	1.87684	0.69362	0.66632	0.389126	6.34282	0.235483	1.26591
SEMA4A	0.391249	0.308712	0.308019	0.296175	0.335538	0.270854	0.354907	0.233468	0.132646	0.411797	0	0.3173
SLC25A44	0.171778	0.0280388	0.0630639	0.051632	0.17028	0.109629	0.143192	0.0842593	0.0463444	0.0911575	0.132638	0.221045
PMF1	0.384452	0.408988	0.402901	0.431065	0.551224	0.239627	0.471065	0.443986	0.253855	0.599472	0.638693	0.785335
BGLAP	0	0.0124734	0	0.00673277	0.00914119	0.0104051	0.0339931	0	0	0	0	0
PAQR6	0.00713397	0.0234883	0.0276219	0	0.010941	0	0	0	0	0	0	0
SMG5	0.0594846	0.0609432	0.0482128	0.0601463	0.173174	0.0425708	0.0783819	0.102395	0.0509054	0.131911	0.0699868	0.0810515
TMEM79	0	0	0	0.0105432	0.0202545	0	0	0.0217326	0	0	0.0473317	0
C1orf85	0.270498	0.0900679	0.165004	0.554589	0.0951258	0.0376852	0.0744053	0.524912	0.191427	0.178164	0	0.177835
CCT3	1.0103	1.05752	0.545659	1.35766	1.10955	0.758188	0.359617	0.860346	0.580471	1.17114	0.637417	0.924289
RP11-98G7.1	0.0155665	0	0	0.0399545	0	0.0104051	0	0	0	0	0	0
MEF2D	0.22853	0.190797	0.289588	0.157808	0.433947	0.161769	0.110534	0.0691797	0.144763	0.244713	0.222842	0.264428
IQGAP3	0	0.00494093	0	0.14739	0	0	0	0	0	0	0	0.032317
TTC24	0	0	0	0	0.105731	0	0	0	0	0	0	0
APOA1BP	0.369857	0.514952	0.331547	0.467241	0.613699	0.248862	0.707631	0.50098	0.349651	0.437856	0.58264	0.285771
GPATCH4	0.231369	0.269806	0.157996	0.289503	0.103958	0.0687836	0.0742678	0.164503	0.0964253	0.261497	0.231307	0.195623
RP11-284F21.9	0	0	0	0	0.0284293	0	0	0	0	0	0	0
BCAN	0.00344111	0	0	0.00809954	0	0	0	0	0	0	0	0.0728231
NES	0.0432814	0.0148181	0.0699504	0.00837396	0.0687595	0.0852374	0	0	0	1.15581	0	0
CRABP2	0.312348	0.0988885	0.299998	0.0348328	0.263548	0.258768	0	0.16575	0.326782	2.94091	0.337659	0.1923
ISG20L2	0.260758	0.167426	0.273478	0.222749	0.43372	0.237861	0.132515	0.151113	0.213783	0.428294	0.206452	0.262398
RRNAD1	0.0989205	0.0713116	0.0633498	0.0454657	0.0433314	0.0453068	0.091317	0.11885	0.0939052	0.0820244	0.126198	0.210361
MRPL24	0.270647	0.342776	0.105484	0.329245	0.218608	0.165585	0.205384	0.289266	0.185719	0.301505	0.401782	0.181894
HDGF	0.380872	0.361436	0.494239	0.668106	0.793333	0.444404	0.496991	0.632761	0.433025	0.810762	0.176082	0.546751
PRCC	0.323805	0.290447	0.258232	0.265264	0.418517	0.162951	0.33334	0.125059	0.223778	0.433357	0.438843	0.494412
SH2D2A	0.0895248	0.108386	0.0522133	0.0518667	0.113145	0.0326085	0.010221	0	0	0.0992497	0.355829	0.461629
NTRK1	0	0.237056	0	0	0	0	0	0	0	0	0.251867	0
PEAR1	0.00304155	0	0.00994663	0	0	0	0	0	0	0.0643755	0	0
LRRC71	0.0135728	0	0	0.0229636	0	0	0	0.0604033	0	0	0	0
ARHGEF11	0.0392891	0.0100138	0.0445304	0.023443	0	0	0.0948672	0.083062	0.0981609	0.135924	0	0.0211942
ETV3	0.384031	0.241602	0.392578	0.243105	1.31226	0.863708	0.0504318	0.123758	0.0757109	0.302321	0.293217	0.51228
RP11-71G12.1	0	0	0	0	0.430788	0	0	0	0	0.0297726	0	0
FCRL5	0.00270881	0.185416	0	0	0.107554	0	0	0	0	0.0388096	0	0
FCRL3	0	0	0.0181576	0	0	0	0	0	0	0.0150259	0	0.0609639
FCRL2	0.00292254	0.0395572	0	0	0	0	0	0	0	0.0388096	0	0
FCRL1	0.0257139	0	0	0.00311582	0	0	0	0	0.0300149	0	0	0
KIRREL	0.00344111	0.0117989	0.0131198	0	0	0.019441	0	0	0	0.124394	0	0
CD1D	0.530771	0.525305	0.795513	0.199042	0.00683681	0.460668	0.781382	0.0620265	0.158157	0.0971915	0	0.24899
RP11-404O13.5	0.544218	0.350697	0.0463158	0.371378	0.00563184	0.0841004	0.0501472	0	0.0389299	0.0368835	0	0.0679872
CD1A	0.0282067	1.03658	0	0.385197	0	0	0	0	0	0	0	0.538261
CD1C	0.329278	2.80145	0.148678	0.790941	0	0	0.244978	0.0568942	0	0.150978	0	1.26902
CD1B	0.0210858	0.0783071	0.0398536	0.0697119	0	0	0	0	0	0	0	0.0253306
CD1E	0.405635	2.29267	0.0741592	0.518907	0	0.198702	0.0419008	0.0114158	0	0.0487378	0	0.436046
MNDA	2.77669	2.15903	5.96597	2.25291	0.0381187	1.35658	11.7851	0.759646	4.25274	1.77559	0.243181	3.61274
PYHIN1	0.0434823	0.0388177	0.0521239	0.0319986	0.0284382	0.0827371	0.0551362	0.0149359	0.0570249	0.124249	0	1.19937
IFI16	3.05153	2.02837	2.05538	2.89621	2.2544	1.80583	2.68925	1.43043	2.67835	3.0943	2.62704	4.09208
AIM2	0.0899387	0.0835184	0.0755574	0.03125	0.00947858	0.302339	0.0357762	0.00575353	0.0815259	0.180011	0	0
CADM3	0	0	0.0121059	0	0	0.0669433	0	0	0	0.0518853	0	0
DARC	0.0550966	0.00694994	0.152593	0.0054813	0.0489821	0.0555982	0	0	0.124185	0.0353763	0	0.026943
FCER1A	0.651216	3.83662	0.137605	0.727508	0.42398	0	0.0484503	0	0	0.138579	0	0.388415
DUSP23	0.816259	0.744116	0.640933	0.755408	0.190461	0.414961	1.01969	1.32975	0.623634	0.295063	0.17716	0.621161
FCRL6	0.0364361	0.0219685	0	0.00719598	0	0.113252	0	0	0.0370392	0	0	0.274161
SLAMF8	0.609164	0.346927	0.0467871	0.399402	0.0120649	0.337998	0.121683	0.335572	0	0.0681766	0	0.199066
CCDC19	0.0202718	0.0387715	0.051092	0.0357643	0	0.0312713	0	0.0978038	0	0	0	0
TAGLN2	2.00709	4.20103	3.26838	3.23313	5.46605	4.81108	2.35985	2.046	2.20878	2.52771	4.68427	3.40441
SLAMF9	0.0230841	0.124808	0.0579783	0.0677275	0	0.0829233	0	0.0292005	0	0.02484	0	0
LINC01133	0.00904936	0.00593711	0	0.012714	0	0	0	0	0	0	0	0
PIGM	0.0427701	0.0110496	0.026871	0.0428181	0.0393282	0	0.174359	0.0801187	0.102745	0.0528408	0.0585381	0.060618
KCNJ10	0	0.00479027	0	0	0	0	0	0.0132215	0	0	0	0
IGSF8	0.0696671	0.185084	0.0427877	0.064716	0.0491729	0.0374034	0.153165	0.157031	0.141882	0.130526	0.241652	0.210992
ATP1A2	0	0	0	0	0.0237335	0	0	0	0	0.105122	0	0
ATP1A4	0	0.0111497	0	0	0	0.019896	0	0.027624	0	0	0	0
RP11-536C5.7	0.0161124	0	0	0	0.00807937	0.00874498	0	0	0	0.0179094	0	0
PEA15	0.890875	1.2653	0.451412	1.00412	0.584308	0.385234	0.191203	0.203394	0.173898	0.491608	0.134605	0.421202
DCAF8	0.119683	0.111043	0.141069	0.201505	0.11749	0.140309	0.176921	0.180705	0.206573	0.249286	0.379772	0
PEX19	0.0721173	0.074045	0.105235	0.0899798	0.080756	0.0542477	0	0.141283	0.0582651	0.175355	0.191666	0.226039
COPA	0.582055	0.531227	0.647712	0.398477	1.07947	0.352021	0.344775	0.377781	0.428529	1.172	0.675481	0.773328
NCSTN	0.261666	0.265698	0.206455	0.317607	0.338	0.110358	0.395845	0.326977	0.428532	0.242824	0.342109	0.188515
VANGL2	0.00402696	0	0	0.00417787	0	0	0	0	0.0222489	0.0776759	0	0
SLAMF6	0.00344111	0.00924967	0.0408813	0.018414	0.012341	0	0	0.00856816	0	0.0494638	0.292819	0.0982331
CD84	1.10383	0.530902	0.583051	0.639954	0.141799	0.746855	0.292759	0.572541	0.122888	0.147422	0.315588	0.613415
SLAMF1	0.0366598	0.0513259	0.0624005	0.0177137	0.0204651	0.0410723	0	0	0	0.00850602	0.312743	0
CD48	1.37081	1.50469	2.96755	1.06518	0.672134	2.1533	2.84393	1.41981	4.72887	1.20033	1.06944	2.11775
SLAMF7	0.373799	0.385628	0.0296888	0.193885	1.40756	1.47783	0.106581	0.640508	0.139702	0.135558	0	0.26405
LY9	0.0917996	0.220246	0.0153625	0.0492673	0.55983	0.0958216	0.010221	0.132366	0.0285124	0.198613	0.076067	0.128141
CD244	0.0495314	0.0592101	0.0376026	0.0386247	0	0.0488674	0.247418	0.0321157	0.298595	0.0296184	0	0.198891
ITLN1	0	0	0.0182482	0	0	0	0	0.0932738	0.0294586	0	0	0
F11R	0.159283	0.218142	0.0509972	0.209298	0.128028	0.412039	0.141235	0.159957	0.0369129	0.0439473	0.134261	0.221355
TSTD1	0.25206	0.687877	0.115012	0.486673	0.853731	1.11207	0.295967	0.955868	0.490198	0.183681	2.25236	0.728143
USF1	0.0407479	0.00655254	0.00727599	0.0147001	0.0295344	0.023126	0.0521053	0	0.0497073	0.0179094	0.076067	0
ARHGAP30	0.715486	0.569914	0.731742	0.399157	0.281503	0.651383	0.572414	0.228265	0.860918	0.498348	0.599516	0.94687
PVRL4	0	0.0181111	0	0.0227721	0	0.00559382	0.0240624	0.0797298	0	0	0	0
KLHDC9	0.00616478	0.0428893	0.0125744	0.0238372	0.0112874	0	0	0.0542132	0.0225715	0.0470308	0	0
PFDN2	1.38969	1.55737	0.941469	1.61282	1.47547	1.1646	0.956557	1.4089	1.36769	1.08947	1.1543	1.49416
NIT1	0.150253	0.15306	0.137349	0.194664	0.109819	0.0809736	0.468065	0.23106	0.114439	0.0493836	0.225817	0.199072
DEDD	0.113696	0.152977	0.11066	0.117731	0.0807005	0.0965571	0.1638	0.0775105	0.154039	0.172755	0.120962	0.107348
UFC1	1.28659	1.55528	1.09537	1.37689	1.72822	1.29376	1.29368	1.75002	1.24386	1.08505	1.50363	1.28468
USP21	0.0200219	0.0231312	0.0179456	0.0297385	0	0.0108393	0	0.00856816	0.0309847	0.0131691	0	0
PPOX	0.0524871	0.0698156	0.0771982	0.0616828	0.0624298	0.0362085	0.0454504	0.0795676	0.0225715	0.0261654	0.245365	0.123085
B4GALT3	0.0874155	0.248867	0.267461	0.131647	0.185237	0.146937	0.10296	0.233303	0.218133	0.150149	0.102709	0.0823287
ADAMTS4	0.0241252	0.0120122	0	0.00376113	0.0466905	0.0299945	0	0	0	0.360425	0	0
NDUFS2	0.589492	0.763329	0.543284	0.641355	0.499616	0.469705	0.41149	0.7703	0.716075	0.616317	0.303561	0.633114
FCER1G	20.3397	14.4657	21.7002	19.7112	10.526	1.05316	18.2685	11.5185	32.5218	6.57469	4.28974	16.1072
TOMM40L	0.164332	0.041287	0.222268	0.0470524	0.0315595	0.0293253	0.0867143	0.00746793	0	0.0431619	0	0.0616062
NR1I3	0.0107541	0.0121306	0.0707554	0.0102061	0	0.0125836	0	0	0	0	0	0
MPZ	0.0154681	0.0144005	0.0195352	0	0.00720471	0	0	0	0	0	0	0
SDHC	0.738185	0.999877	0.593314	1.06463	0.751309	0.776636	0.673918	1.4837	0.873305	0.649266	0.749291	0.950029
C1orf192	0.0138743	0.0206508	0.0115057	0.093157	0.0231954	0.0273277	0	0.191473	0.0306463	0.0131691	0	0.0506613
RP11-122G18.5	0	0	0.0186241	0	0	0.0213884	0	0	0	0	0	0
FCGR2A	5.40264	1.55043	2.84297	3.47126	0.06322	0	1.20569	0.436655	1.09157	0.904877	0.0699868	2.2557
HSPA6	1.86347	2.5839	0.201148	10.739	0.142985	1.31786	0.611318	2.15185	0.57547	1.11815	0	0.389142
FCGR3A	4.60311	0.655495	1.49126	3.50061	0.0103636	0.0131661	0.609437	0.397512	17.5979	1.14065	0	2.11598
FCGR2B	2.37933	3.00254	1.13052	2.61938	0.0423154	0.020032	0.340236	1.61579	0.272323	0.637176	0	0.822955
FCGR3B	0.0235455	0.0213764	0.0162595	0.012161	0	0	0.0444824	0.0510069	0.583237	0.125928	0	0
FCRLA	0.00438005	0	0.0166827	0	0.200843	0	0	0	0	0.0276096	0	0
FCRLB	0.0106752	0.0400744	0.0690009	0.0653106	0.0148181	0	0.0306657	0	0	0	0	0.105509
DUSP12	0.108104	0.065856	0.0850096	0.176356	0.0826749	0.0753459	0.211845	0.133981	0.0947488	0.121112	0.198199	0.222892
RP11-474I16.8	0.0343334	0.0365958	0.0198716	0.0537845	0.0440709	0.0101717	0.0331016	0.00575353	0	0.0286972	0	0
ATF6	0.829064	0.411854	0.786104	0.310013	0.278486	0.363792	0.61768	0.439926	0.623851	0.571694	0.558442	0.528514
OLFML2B	0.488192	0.120428	0.0320383	0.175099	0	0.0128454	0.00511051	0.0389259	0	0.140537	0.0629667	0.303537
NOS1AP	0.00221603	0.00823862	0	0	0	0.0131912	0	0	0	0.021966	0	0
SH2D1B	0.015463	0.026111	0.00476735	0.0250833	0.0390774	0.008837	0.0674368	0	0.16593	0	0.737439	0.227141
UHMK1	0.372447	0.436124	0.419122	0.336	0.629357	0.548773	0.613374	0.563933	0.521818	0.444023	0.865093	0.36544
RP11-359K18.3	0.0233158	0.0036034	0.00727599	0.00950441	0	0	0	0	0	0	0	0
UAP1	0.21101	0.202321	0.114232	0.14938	0.207354	0.131528	0	0.0924823	0.0225715	0.278179	0.688487	0.195486
DDR2	0.0225823	0.00452411	0	0	0.0623193	0.0354373	0.00511051	0	0.0537421	0.601009	0.0524753	0.0137926
HSD17B7	0.101596	0.104073	0.0569492	0.159044	0.117761	0.120192	0.0240624	0.0346717	0.105161	0.0952449	0.171099	0.283279
RGS4	0	0	0	0.0128273	0	0	0	0	0	0.0844852	0	0
RP11-267N12.3	0	0.00982324	0	0.0169872	0	0	0	0	0.0264794	0	0.0963753	0
NUF2	0.0187785	0.0349426	0.0179456	0.360529	0.0193492	0.0584167	0	0.0132215	0	0	0	0.0842412
PBX1	0.0531411	0.126475	0.0878058	0.0372289	0.0358736	0.104092	0	0.0285216	0	0.740519	0.225488	0.0214317
RP11-306I1.2	0.00906763	0.00418404	0	0	0	0	0	0.0144025	0	0	0	0
MGST3	1.14119	0.884802	0.58277	1.80029	0.545673	1.01044	1.17742	4.55147	1.33461	1.21972	1.17676	0.831981
ALDH9A1	0.289786	0.248832	0.0943522	0.181755	0.273322	0.190385	0.245338	0.560693	0.187221	0.415744	0.330418	0.219363
TMCO1	0.882576	0.859356	0.805872	1.28846	1.1869	0.472837	0.673213	1.34011	1.36712	1.21782	1.04603	1.12758
RP11-466F5.8	0.00935352	0	0	0	0.0122305	0	0	0.0374877	0	0	0	0
UCK2	0.101389	0.110553	0.00476735	0.135017	0.281368	0.104122	0	0.163868	0.0678521	0.0436767	0	0.026943
FAM78B	0.00399931	0.00277059	0	0	0	0	0	0	0	0.0161221	0	0
POGK	0.0945197	0.070712	0.142353	0.216332	0.16282	0.0935635	0.0704552	0.169656	0.187207	0.0863631	0.18909	0.0488118
TADA1	0.0107388	0.0274868	0	0.00918339	0	0	0	0.0252604	0	0.0138048	0	0
ILDR2	0	0	0	0.00380872	0	0	0	0	0	0.0128084	0.0963753	0.026943
GPA33	0.00906763	0	0	0.0104614	0	0	0	0	0	0	0.0963753	0.0852777
RP11-277B15.3	0	0	0	0.0400167	0.0140661	0	0	0.0343484	0	0	0	0
POU2F1	0.139314	0.0804411	0.0785879	0.128389	0.123744	0.173851	0.248244	0.030014	0.299986	0.137701	0	0.381444
CD247	0.104585	0.13406	0.06122	0.0824107	0.12061	0.0963126	0.349506	0.068667	0.189745	0.213961	0.611511	1.381
RP11-104L21.3	0	0	0	0	0	0	0	0	0	0.0307409	0.065229	0
CREG1	2.42398	0.665325	1.28599	2.9014	0.122685	0.679864	0.960864	3.42099	0.731546	0.623382	0.516355	0.674343
RP3-455J7.4	0.00252451	0.00924967	0	0.04311	0	0	0.0453213	0	0.0389299	0	0	0
RCSD1	0.769532	0.437563	0.543852	0.297263	0.592746	0.139251	0.794047	0.139222	1.03122	0.430552	0.76685	0.718274
MPZL1	0.312472	0.228767	0.209701	0.316943	0.338783	0.213651	0.256388	0.330871	0.246263	0.506967	0.0526319	0.05926
MPC2	0.739409	0.972725	0.454073	1.41741	0.685035	1.09778	0.36978	1.04744	0.479745	0.565796	1.41295	0.849394
DCAF6	0.14629	0.196843	0.0861598	0.218265	0.242022	0.312409	0.0756528	0.222108	0.204977	0.08229	0.367988	0.198695
GPR161	0	0	0.0158195	0	0.00971874	0.0127279	0	0.00575353	0.0297984	0.0697267	0	0
TIPRL	0.312316	0.362048	0.299327	0.49637	0.235618	0.177342	0.206605	0.626151	0.261187	0.426708	0.478515	0.432242
SFT2D2	0.44326	0.328606	0.339226	0.384248	1.50496	0.617264	0.600747	0.212478	0.729541	0.332013	0.108208	0.412611
TBX19	0.019234	0.0235212	0.0173595	0.0114771	0.130823	0.0375007	0.119799	0	0.0542806	0	0.0676599	0
XCL2	0.0962802	0.0725741	0.0543359	0.0814225	0.0352302	0.0842257	0.145104	0.170134	0.142874	0.686947	17.1174	2.29284
XCL1	0.059404	0.0341485	0.0268573	0.0930259	0.0834052	0.0519076	0.157423	0.174083	0.096227	0.56469	9.68885	2.33243
DPT	0.00934063	0	0	0	0	0.00559382	0	0	0	0.119258	0	0
ATP1B1	0.694069	0.514926	0.0097248	0.959291	0.027776	0.633858	0.151329	2.22087	0.0389299	0.1398	0.343375	0.38848
NME7	0.141301	0.0699026	0.0590669	0.0967462	0.0594602	0.0341145	0.14924	0.175781	0	0.122003	0.313868	0.0930881
BLZF1	0.11065	0.122739	0.106913	0.0667334	0.0871403	0.0889874	0.0362166	0.118433	0.0953741	0.170302	0.119077	0.21016
SLC19A2	0.192565	0.0196892	0.0619465	0.0908273	0.0387213	0.0333718	0.0362166	0.202379	0	0.0536024	0.207897	0
F5	0	0.00429344	0.174009	0.00237324	0	0	0.0587477	0	0	0.0530446	0	0
C1orf112	0.0405206	0.00690442	0	0.0784151	0.00926226	0	0	0	0.0386518	0.0304246	0	0.0651691
SELL	0.219673	0.401495	2.24471	0.188061	4.53772	0.372033	1.15732	0.0974443	0.583885	0.812401	0	1.77906
METTL18	0.0235113	0.0426938	0.018271	0.0554883	0.0677331	0.0369567	0.128129	0.0300658	0	0.0328396	0	0.0340209
SCYL3	0.0309682	0.0120377	0.00299373	0.0404959	0.0395063	0.0422018	0.0449152	0	0.0794399	0.0347745	0.302407	0.141962
KIFAP3	0.102892	0.0729003	0.0398536	0.104635	0.207138	0.0492939	0.0523073	0.0333464	0.173656	0.18798	0.359464	0.310326
GORAB	0.0287472	0.033273	0	0.0944931	0.019383	0.0361093	0.039336	0.0677885	0.0720944	0.021966	0	0
PRRX1	0.0216488	0.00827155	0.0602094	0	0.0596391	0.0268169	0	0	0	0.858934	0	0.0214317
RP1-79C4.4	0	0	0	0.00237324	0.0105402	0.00946569	0	0	0.0234471	0.100658	0	0
RP1-45C12.1	0	0	0	0	0.0471114	0	0	0	0	0	0	0
FMO4	0.0269804	0.00760621	0	0.00838106	0.0180392	0	0	0.0238107	0.0278214	0.0392894	0	0
PRRC2C	2.38529	1.98178	2.21455	1.35306	2.85503	1.9726	1.21485	1.06974	2.10909	2.74819	3.27269	3.04854
VAMP4	0.0881785	0.121553	0.14803	0.0566891	0.0970419	0.0582974	0.0381886	0.343437	0.290897	0.0795787	0.315936	0.145192
METTL13	0.0688672	0.0757582	0.0349855	0.0812903	0.105012	0.0592258	0.0824757	0.123361	0.0573366	0.0612937	0	0.171645
DNM3	0.0116315	0	0.00598746	0	0	0.024682	0	0	0	0.0388096	0.222968	0
DNM3OS	0	0.0114011	0.0174355	0	0	0	0	0	0	0.107493	0	0
PIGC	0.183016	0.189159	0.172198	0.242834	0.179364	0.0620433	0.291473	0.165863	0.231055	0.163482	0.118159	0.0774075
SUCO	0.275281	0.232822	0.235535	0.240605	0.177028	0.353278	0.102333	0.137826	0.140198	0.383385	0.18982	0.285044
FASLG	0.0224533	0	0	0.00380872	0.00563184	0.008837	0.0360836	0	0.0745715	0.0681402	0	0.0907508
TNFSF18	0.236878	0.0117418	0.00299373	0.0676827	0	0.0168647	0	0	0	0.0415514	0	0
TNFSF4	0.0340003	0.0642709	0	0.00884602	0.026269	0.0605592	0.023892	0	0	0.0541624	0.849351	0.0680418
RP11-296O14.3	0.00904065	0.00459801	0.00727599	0	0.0454202	0.0126257	0	0	0.123926	0.060981	0.153827	0.150447
PRDX6	1.73613	2.21066	1.43072	2.07484	1.88822	1.23007	1.0733	2.03001	1.12909	1.73854	0.864967	1.96384
KLHL20	0.0785478	0.0998608	0.0239258	0.0640789	0.143671	0.0620988	0.0898334	0.0556253	0.0845862	0.0984286	0.203568	0.301042
CENPL	0.0234023	0.0238465	0	0.0896734	0.0797132	0.0252093	0	0.00746793	0.0234471	0.0976256	0.134261	0.0714402
DARS2	0.0150003	0.0423306	0.0313184	0.0600585	0.0328455	0.0252058	0.0652714	0	0.030295	0.0136232	0.0590797	0.0423883
ZBTB37	0.0590864	0.051162	0.0999202	0.0532991	0.0505989	0.0465209	0.0802932	0.0305402	0.027876	0.149885	0.206367	0.026943
RC3H1	0.23092	0.205931	0.253759	0.110274	0.138264	0.121457	0.296419	0.134578	0.277222	0.245875	0.406275	0.285496
RP11-160H22.3	0.0149113	0.00960084	0.0107578	0	0	0.00843233	0.0306657	0.0283727	0	0.0150259	0	0
RABGAP1L	0.383032	0.21227	0.35393	0.444096	1.44875	0.335639	0.426983	0.174472	1.49102	0.514326	1.05669	0.620811
GPR52	0	0	0.0101857	0	0.0280311	0	0	0	0	0.0161221	0	0
CACYBP	1.21955	1.37449	0.64694	2.39207	0.59315	1.13382	0.672891	0.480104	1.3259	0.673682	1.05413	1.49468
MRPS14	0.302075	0.511493	0.317549	0.476207	0.313671	0.268357	0.442887	0.392057	0.232662	0.438865	0.327281	0.219067
KIAA0040	0.0571032	0.10179	0.110592	0.0597733	0.0794888	0.0891379	0.0845291	0.0388268	0.161076	0.0172267	0	0.0137926
RP11-318C24.2	0.0116728	0.00748811	0.0189336	0	0	0	0	0	0	0	0	0
RFWD2	0.219257	0.264415	0.346041	0.223086	0.190221	0.234913	0.308817	0.297412	0.14578	0.104319	0.338122	0.260944
RP11-492I21.1	0	0.00452411	0	0	0.0128986	0	0	0	0	0	0	0.0255989
RP11-195C7.1	0	0	0.0128451	0.00299944	0.0120202	0	0	0	0	0	0	0
SEC16B	0.00769711	0	0	0	0	0	0	0	0	0.0564946	0	0
RASAL2	0.149828	0.0627095	0.0189951	0.0788853	0.00807937	0.171331	0	0.0517812	0	0.0424197	0	0.0720929
RALGPS2	0.071478	0.117439	0.129715	0.00338726	0.234938	0.0716109	0.0689775	0	0.058259	0.223219	0.0707489	0.0488118
FAM20B	0.0386085	0.0395984	0.0476603	0.0316089	0.0752403	0.125296	0.0357762	0	0.0863754	0.192489	0.065229	0.091749
TOR3A	0.311568	0.631534	0.150926	0.400165	0.410348	0.852974	0.0982275	0.760083	0.194083	0.18465	0.491135	0.234342
ABL2	2.37916	0.243901	0.485541	0.551981	0.217271	0.199103	0.0800109	0.516822	0.118628	0.7341	0.153226	0.562179
SOAT1	0.775188	0.440928	0.474794	0.639456	0.0704539	0.328867	0.353662	2.33078	0.335805	0.432278	0.44842	0.533577
AXDND1	0.0052661	0	0	0	0	0.0106666	0	0.0321157	0	0	0	0
TOR1AIP2	0.481172	0.386694	0.473579	0.343107	0.513996	0.559178	0.302482	0.541959	0.452018	0.763261	0.538682	0.367219
RP11-533E19.7	0.0121663	0	0	0.0205231	0.0122305	0	0.0693424	0	0	0.0135142	0.136701	0
TOR1AIP1	0.311347	0.215135	0.189677	0.297246	0.279003	0.274119	0.307232	0.319272	0.37067	0.167226	0.352494	0.284303
RP11-533E19.5	0.0131247	0.00466267	0.0231423	0.0298114	0	0.0271769	0	0.0132215	0	0	0	0
CEP350	0.949206	0.533151	0.834017	0.464565	0.977831	1.27287	1.22542	0.454917	0.830162	1.153	1.08613	0.669597
QSOX1	0.358592	0.387823	0.557262	0.459464	0.0357831	0.102952	0.490831	0.376926	0.259854	0.322097	0.554264	0.541438
RP5-1180C10.2	0.0193245	0.00479027	0.0301989	0.0146569	0.0347934	0.0164487	0	0	0.0294586	0.014266	0.0714725	0
ACBD6	0.273611	0.14839	0.078765	0.205232	0.219782	0.186325	0.159373	0.0785859	0.256062	0.279175	0.290145	0.261241
XPR1	0.0710939	0.042379	0.151129	0.0636245	0.0731351	0.113251	0.220841	0.0462286	0.1868	0.121451	0	0.168271
KIAA1614	0	0	0	0.00380872	0	0	0	0	0	0.0310315	0	0.0253306
RP11-46A10.4	0.00997787	0.00573279	0	0.0121443	0	0	0	0	0	0	0	0
STX6	0.535691	0.502959	0.481902	0.398469	0.154973	0.177436	0.223519	0.0613307	0.117037	0.339219	0.174935	0.401923
MR1	0.308521	0.153522	0.18175	0.195685	0.209947	0.120042	0.229628	0.220942	0.395796	0.0946453	0.121752	0.198884
IER5	1.98298	1.18234	0.745333	3.81652	0.312226	1.43201	0.806921	0.382067	1.37058	1.21873	0.599296	1.43001
RP11-309G3.3	0.0251103	0.0201473	0.0125853	0.163104	0.0283145	0.0234843	0.00511051	0.0184105	0	0.00850602	0	0
GLUL	8.80251	4.57526	7.01213	8.58959	2.15148	0.243885	4.14803	9.19915	4.2074	3.59239	0.94214	4.40419
RNASEL	0.068275	0.0235534	0.0266011	0.0458392	0.0834177	0.0085142	0.0321718	0.0144025	0.167945	0.121405	0.0699868	0
RGS16	0.623038	0.576414	0.0642967	4.50409	0.0736019	0.0295563	0	0.0114158	0	0.433792	0.620042	0.441783
RP11-317P15.4	0.0240272	0.0122149	0	0	0	0	0	0	0	0	0	0
NPL	0.542636	0.0784503	0.344708	0.799717	0.00980258	0.0203435	0.200948	2.82247	0.458804	0.200114	0	0.169166
DHX9	0.529133	0.438451	0.59687	0.344383	0.642011	0.360646	0.370412	0.225066	0.471505	0.775512	0.339887	0.438846
LAMC1	0.0573395	0.0219007	0.158086	0.00237324	0.112807	0.0170361	0	0.0678712	0.0305968	0.393833	0	0
LAMC2	0.0322908	0.0957333	0.0202824	0.0653748	0	0.0340611	0	0.0171363	0	0.0218771	0	0.0350192
NMNAT2	0	0.0121375	0	0.0165784	0	0	0	0.0224092	0	0	0	0
SMG7	0.109085	0.155437	0.167374	0.119985	0.215673	0.15462	0.383362	0.126183	0.154515	0.20431	0.234774	0.319903
NCF2	0.858154	1.09892	2.63874	0.623815	0.147074	0.0525671	2.13929	0.975127	2.9457	0.988058	0	1.22511
ARPC5	3.79324	5.03559	4.28414	5.21684	2.85819	3.18287	3.86083	5.63425	5.80299	3.13841	2.42196	4.66912
RGL1	0.503027	0.0415483	0.218412	0.0561616	0.0170073	0.0138472	0.166953	0.231435	0.0706855	0.143283	0	0.257735
COLGALT2	0.0108521	0.0103225	0.00299373	0.0096474	0.0215847	0	0	0	0	0.00854745	0	0
TSEN15	0.158374	0.235136	0.0804228	0.318199	0.156289	0.162527	0.199047	0.105216	0.0545444	0.224586	0.256751	0.165824
C1orf21	0.113533	0.208804	0.0473266	0.438703	0.0340354	1.13879	0	0.105657	0.0307208	0.120205	0	0.350414
EDEM3	0.273015	0.221559	0.304	0.147943	0.19	0.10532	0.277944	0.141102	0.132313	0.271827	0	0.339572
FAM129A	0.443242	0.379677	0.321447	0.260119	0.518041	0.973783	0.170213	0.222526	0.115622	0.361878	1.30061	0.658424
RNF2	0.129402	0.220573	0.206515	0.172696	0.14862	0.167541	0.292021	0.406083	0.118337	0.205633	0.147222	0.371019
TRMT1L	0.115323	0.111053	0.0334278	0.0797042	0.0830761	0.0843891	0.0925407	0.0614247	0.0529057	0.0680003	0.0705871	0.135692
SWT1	0.0559577	0.049528	0	0.0301747	0.0116805	0.0386828	0.0338293	0	0	0	0	0
IVNS1ABP	1.21067	1.19094	3.32978	0.790131	0.379853	0.645269	0.962768	0.94623	0.702048	1.20136	2.03971	1.92299
GS1-279B7.2	0.00502301	0	0	0	0	0	0	0	0	0.0129963	0	0.0255989
HMCN1	0.00279823	0	0.0304377	0	0	0	0.0314688	0	0	0	0	0
TPR	0.877392	0.783598	0.907891	0.716878	1.45938	1.0432	0.623818	0.612475	1.02188	1.68681	1.27233	1.29349
C1orf27	0.196083	0.153757	0.0848701	0.201192	0.217251	0.0736078	0.0734353	0.114228	0.0611277	0.184186	0.0524753	0.190892
PTGS2	1.2875	0.913983	1.7605	0.890894	0.210693	0.112409	0.634473	0.218386	1.05362	0.425747	0.0524753	0.28752
RP5-973M2.2	0.00987333	0.00530586	0	0.0243308	0	0	0	0	0	0	0	0
PLA2G4A	0.166018	0.068447	0.0498067	0.121623	0.0894881	0.0533542	0.0867209	0.0805272	0	0.0376251	0	0.0749428
RGS18	0.574969	0.434446	0.975185	0.480699	0.280277	0.881931	1.52466	0.0400262	2.0984	0.234735	0.286912	0.754371
RP5-1011O1.3	0.00858705	0.00819555	0	0	0	0	0	0	0	0	0	0
RGS1	28.809	28.2799	2.89791	37.3971	24.1483	19.6987	1.10865	6.12841	1.22447	6.86704	15.8219	17.2004
RGS13	0.0930633	0.311303	0.0350918	0.0154448	0.706484	0.0749283	0	0	0	0.0898845	0	0.11344
RGS2	14.0705	10.1998	12.6528	14.6481	35.5554	5.14137	13.9165	5.72209	9.70791	7.83643	3.68428	13.1584
UCHL5	0.285185	0.280721	0.244849	0.357646	0.398874	0.12193	0.148604	0.0935178	0.121465	0.324587	0.277867	0.321518
TROVE2	0.499834	0.468484	0.522385	0.56241	0.990989	0.527288	0.367438	0.193285	0.27399	0.680054	0.88088	0.562595
RP11-101E13.5	0	0	0.00696406	0.0179177	0	0.0117526	0	0	0	0	0	0
GLRX2	0.196803	0.204013	0.282147	0.155634	0.112397	0.164787	0.126492	0.167328	0.363698	0.169727	0	0.205832
CDC73	0.492634	0.302623	0.443444	0.418791	0.714834	0.290208	0.454297	0.297109	0.413444	0.3663	0.457845	0.46915
RP11-563D10.1	0	0	0	0	0	0	0	0	0	0	0.218323	0
RP11-476B1.1	0	0	0	0.0054813	0.303753	0.0702033	0	0	0	0.0457403	0	0
CFH	0.0119767	0.0157204	0.0201552	0.0149244	0	0	0.00511051	0	0	0.00854745	0.670216	0
ASPM	0.038597	0.0251957	0.0521799	0.591987	0.0144117	0.0847786	0.0440969	0	0.0626204	0	0	0.249541
ZBTB41	0.0450132	0.0697059	0.06877	0.0740176	0.0914484	0.0510752	0.110495	0.124227	0.138819	0.0811907	0	0.0646822
DENND1B	0.327518	0.636504	0.123291	0.26719	0.298258	1.0455	0.176677	0.148515	0.118927	0.225773	0.438152	0.689659
C1orf53	0.0266156	0.0398324	0.015124	0.0367509	0	0	0.0422744	0.0184043	0.094624	0.0541624	0	0.0214317
NEK7	0.305481	0.235126	0.270571	0.3446	0.226154	0.379299	0.179201	0.44262	0.342617	0.163257	1.07176	0.535808
PTPRC	6.58729	6.15665	7.0138	4.446	3.26551	5.96529	5.58333	1.28121	10.2806	4.00142	10.8217	13.4514
MIR181A1HG	0.649697	0.428083	0.313813	0.413497	0.0121051	0.711102	0.288465	0.12743	0.259605	0.333585	0.0963753	0.496493
NR5A2	0.0105136	0	0.0398295	0.00619023	0.0104541	0	0	0	0.0222489	0.0541624	0	0
ZNF281	0.176652	0.195245	0.892592	0.128578	0.221229	0.319787	0.432368	0.564753	0.379703	0.391227	0.351673	0.403731
KIF14	0.0069874	0.00425845	0.0110394	0.186826	0	0	0	0	0	0.0172267	0	0
DDX59	0.146453	0.100528	0.159989	0.123336	0.162567	0.105305	0.150247	0.128138	0.263736	0.104361	0.0585381	0.0743476
RP11-92G12.3	0.011104	0.0157267	0	0	0.0117666	0	0	0	0.027264	0	0	0
CAMSAP2	0.157122	0.0596499	0.0455673	0.0520583	0.0300296	0.0227328	0.0888558	0.027096	0	0.301897	0	0.0646822
C1orf106	0	0	0	0.0100551	0	0	0	0.0217326	0	0	0	0
KIF21B	0.0586157	0.00346682	0.00597258	0.0129115	0	0.0481029	0	0	0.0314608	0.0632093	0.0473317	0.0214317
RP11-168O16.1	0.0325833	0	0	0.0426986	0	0	0	0	0	0.0141978	0	0
TMEM9	0.205157	0.147426	0.0832893	0.275802	0.210389	0.0528141	0.0270655	0.0550493	0.142837	0.547066	0.309103	0.105474
LAD1	0.0276376	0.0242533	0	0.0769877	0.00804861	0.652567	0.0810248	0.0904832	0	0	0	0.0593515
RP11-134G8.8	0	0	0	0.0147873	0	0	0	0	0	0.0358187	0	0
PHLDA3	0.0144369	0.0549811	0.0135495	0.10338	0.0273353	0.124894	0.076322	0.653023	0.027876	0.18157	0	0.032317
CSRP1	0.418566	0.41923	0.155652	0.395638	0.167337	0.73842	0.224914	0.091842	0.275499	1.05408	0.0590797	0.215562
RP11-134G8.7	0.00944687	0.00871971	0	0.00635698	0	0.027779	0	0	0	0	0	0
RPS10P7	0.0327896	0.0104368	0.0241236	0.00864215	0.0104541	0.0214627	0	0	0.0591618	0.0336199	0	0
AC096677.1	0.0684275	0.0249019	0.0172998	0.0206807	0	0.221928	0.0449152	0	0	0.0427232	0	0.046295
NAV1	0.100387	0.130914	0.0485814	0.12634	0.011661	0.430991	0	0.0517569	0.0274583	0.0933369	0.0585381	0.0781408
IPO9-AS1	0.0114826	0.00452411	0.0352849	0	0	0.0101717	0	0	0.0572326	0	0	0.0214317
IPO9	0.0871284	0.149001	0.0861466	0.0791945	0.184368	0.101642	0.00511051	0.0470464	0.0867951	0.212653	0.157121	0.076953
SHISA4	0.05433	0.071242	0.0212877	0.111921	0.01984	0.224822	0.071781	0	0.0495129	0.0644597	0.0473317	0
LMOD1	0.0154435	0.00554118	0.0174427	0.00619023	0	0.00930805	0	0	0	0.0817429	0	0
TIMM17A	0.547818	0.701963	0.437435	0.612329	0.381882	0.612309	0.671843	0.869537	0.505016	0.598421	0.591815	0.655267
RNPEP	0.581182	0.570013	0.582878	0.766436	0.283554	0.465442	0.465658	0.446467	0.897791	0.216313	0.196359	0.335145
RP11-465N4.4	0	0.0176067	0	0.0130351	0	0.0101717	0	0.0604033	0	0.011324	0	0
ELF3	0.139115	0.553605	0.11608	0.536024	0.213645	0.142258	0.349042	0.59346	0.129473	0.0424611	0.213755	0.201697
ARL8A	0.371681	0.236476	0.403536	0.351308	0.234505	0.156213	0.242143	0.380319	0.290342	0.33931	0.420699	0.330343
PTPN7	0.338123	0.532575	0.315041	0.392402	0.216843	0.257863	0.0925145	0.157161	0.0234471	0.227848	1.34654	1.04532
UBE2T	0.0497219	0.0510419	0	0.322504	0.0407618	0.0692374	0.010221	0.0607373	0	0.0719175	0	0.217552
PPP1R12B	0.0816051	0.0368443	0.0385332	0.0467139	0.0498338	0.204025	0.0846978	0	0.0932324	0.222051	0	0.0695688
SYT2	0	0.0617566	0	0.00299944	0.0105402	0	0	0	0	0	0	0.026943
KDM5B	0.202282	0.198902	0.159007	0.0694372	0.126934	0.262143	0	0.284873	0.0812002	0.658345	0.546224	0.0861139
PCAT6	0.0211891	0.00530586	0.0176601	0	0.0244972	0.0173532	0	0.0629135	0	0.0357524	0.0585381	0
RABIF	0.177408	0.214401	0.221617	0.358592	0.154751	0.151468	0.212229	0.206677	0.280814	0.137201	0.129125	0.159242
KLHL12	0.0720962	0.072925	0.0363073	0.0518583	0.0404834	0.0539631	0.102781	0.147092	0.107472	0.0832125	0.0526319	0.0818122
ADIPOR1	0.792012	0.579211	0.746983	0.758781	0.542521	0.390125	0.543874	1.45966	0.512825	0.508288	0.565185	0.464827
CYB5R1	0.363068	0.145575	0.240231	0.290339	0.0806096	0.11455	0.171066	0.385208	0.1256	0.174515	0.138409	0.21635
TMEM183A	0.449106	0.590385	0.629738	0.470424	0.460475	0.284374	0.650096	0.699255	0.470418	0.521628	0.783352	0.500429
ADORA1	0.00399931	0.0487655	0	0.0108958	0	0.0127279	0.0420918	0	0	0	0.0791221	0
MYBPH	0	0.00429344	0	0	0.0999307	0	0	0	0	0	0	0
CHI3L1	0.00474665	0.0157708	0	0.0390538	0	0	0	5.35654	0	0	0.0806205	0.0255989
CHIT1	0.00389455	0.00917827	0	0.0163548	0	0	0.0419008	16.474	0	0	0	0.161191
RP11-134P9.3	0.0314711	0.059925	0.0120433	0.0256759	0.0285211	0.00467954	0.120764	0	0.0431749	0.0179094	0	0.0137926
LINC01136	0.0290742	0.00748811	0.0279344	0	0.0481126	0	0.0454504	0	0.0305968	0.0161221	0	0
BTG2	3.33735	2.68356	3.09318	1.86537	7.26903	2.93352	1.54058	0.695432	2.76617	2.85197	4.49301	2.04195
FMOD	0.00430627	0.00277059	0.0333221	0.00970666	0.0529081	0.0116235	0.00511051	0	0	0.1439	0	0
ATP2B4	0.176469	0.173852	0.173402	0.179099	0.412807	0.292358	0.29143	0.0485076	0.158552	0.540734	0.706767	0.387131
LAX1	0.0172551	0.149723	0	0	0.0320271	0.00843233	0	0	0	0	0.0806205	0.11594
ZC3H11A	0.43704	0.394184	0.538381	0.275479	0.61608	0.276863	0.403922	0.217609	0.334561	0.756492	0.624886	0.227158
ZBED6	0.176932	0.112039	0.10462	0.0762357	0.216947	0.121921	0.0346854	0.00856816	0.0334963	0.400736	0.363221	0.102054
SNRPE	1.316	1.8848	1.94211	2.17397	1.70637	1.75061	2.81345	1.70435	1.64685	2.34357	1.29582	1.68273
SOX13	0.011104	0.00290945	0.0253399	0.00214858	0	0.00889743	0	0	0	0.0188184	0	0
ETNK2	0.0182319	0.00421086	0	0	0	0	0	0	0	0.011324	0	0
REN	0.0036212	0.0107256	0	0	0	0	0	0	0	0	0	0
PLEKHA6	0	0.0141475	0	0	0	0	0	0	0	0	0	0
PPP1R15B	0.524567	0.312321	0.969118	0.286178	0.24317	0.315354	0.206646	0.370189	0.777144	0.904337	0.550232	0.433021
PIK3C2B	0.00582289	0.0286337	0.0291816	0.0170161	0.00912467	0	0.0311061	0	0	0.103771	0	0.112221
MDM4	0.453625	0.653521	0.606483	0.357744	1.22485	0.273013	0.839839	0.470895	0.739597	0.998346	0.822254	0.898007
NFASC	0.00506753	0	0	0	0	0	0.0791294	0	0	0	0	0
TMEM81	0	0	0	0	0	0.00467954	0	0	0	0.0350444	0	0
RBBP5	0.107931	0.10765	0.082894	0.105051	0.174465	0.0788202	0.0644864	0.112521	0.189044	0.22812	0.23472	0.173212
DSTYK	0.0655237	0.018239	0.0249163	0.0888556	0.0852635	0.0117526	0	0.0366349	0.14866	0.425536	0.128542	0.191107
NUAK2	0.0179275	0.0163445	0.0202037	0.035555	0.0279947	0.23037	0.0720179	0	0.0716874	0.162873	0	0.0632139
CDK18	0.034737	0.0206887	0	0.0348473	0	0.015498	0	0.104669	0.0309847	0	0	0
MFSD4	0	0	0	0.00551925	0	0	0.0723092	0	0	0	0	0
ELK4	0.182927	0.162218	0.203584	0.154942	0.320584	0.253403	0.127411	0.266515	0.0952717	0.422465	0.441446	0.564842
SLC45A3	0.0103053	0.176263	0	0.0105432	0	0	0	0	0	0	0	0
NUCKS1	1.63757	1.65102	0.959885	2.95304	1.5776	1.50954	0.834763	1.26314	0.950473	2.78948	2.23208	1.28156
RAB7L1	0.197497	0.182381	0.0563411	0.214724	0.085049	0.702493	0.106177	0.10794	0.324719	0.161219	0.0963753	0.357517
SLC41A1	0.0171013	0.0254907	0.0359687	0.0403855	0.0121051	0	0	0	0	0.0874454	0.120172	0
RP11-312O7.2	0.241601	0.114863	0.127961	0.0575448	0.221053	0.157122	0.0659136	0.00856816	0.312916	0.164896	0	0.0350192
FAM72A	0.105559	0.0463434	0.0749679	0.153696	0.055112	0.0748072	0.107062	0	0.0549167	0.0474978	0	0.260023
C1orf186	0.025617	0.290708	0.0430899	0.113997	1.38529	0.136544	0.0357762	0.209669	0.0307208	0.172291	0	0
RP11-38J22.6	0	0	0	0	0.0437408	0	0	0	0	0	0	0
CTSE	0	0.0270081	0	0.0200999	0	0	0	0	0	0	0	0
SRGAP2	1.14988	0.32679	0.853972	0.376442	0.962082	0.445052	0.598141	0.0624137	0.7174	0.513181	0	0.661732
IKBKE	0.181399	0.111852	0.132297	0.131577	0.0438484	0.0131661	0.160608	0.06541	0.0592882	0.114344	0.150757	0.223446
RASSF5	0.564489	1.07747	0.50991	0.381893	0.932351	0.850637	0.530064	0.141895	0.92164	0.28926	1.80555	0.768096
EIF2D	0.116334	0.0943217	0.0768329	0.0546421	0.117082	0.18157	0.0500257	0.114896	0.0604491	0.120877	0.24496	0.0785148
RP11-343H5.6	0.00476174	0	0.0166545	0.00237324	0	0	0	0.00856816	0	0	0.0707489	0
DYRK3	0.0145247	0	0.0165508	0.00777505	0.0408683	0.0166611	0	0.0910625	0	0.0246695	0.192707	0
MAPKAPK2	0.286126	0.253041	0.444862	0.12452	2.27056	0.148867	0	0.0784072	0.280953	0.480082	0.409924	0.263522
IL10	0.703708	0.0508794	0.575346	0.219225	0	0	0.275073	0.110066	0.100244	0.316134	0	0.204406
IL19	0.0325936	0.0212273	0.00731482	0	0	0	0	0	0	0.00850602	0	0
IL20	0	0	0	0.0132617	0	0	0	0	0	0.0135142	0	0.0827558
IL24	0.0373113	0	0	0	0	0	0	0	0	0	0	0.046295
FAIM3	0.132116	0.0523803	0.0400972	0.0436128	0.0458271	0.0308401	0.0240624	0.179755	0.0285124	0.162993	0.385859	0.195311
PIGR	0.188804	0.943915	0.0336865	1.4399	0.082165	0.113421	0.375224	2.13694	0.0594844	0.0351352	0.0707489	0.234014
YOD1	0.0436495	0.0299104	0.074847	0.0172504	0.0954025	0.0706239	0.0306925	0.0734985	0	0.0457921	0	0.032317
PFKFB2	0.0621647	0.0183458	0.00784188	0.0786409	0.74301	0.00998052	0.0270655	0.0263888	0.0463444	0.0702433	0	0
C4BPB	0.0157058	0	0	0	0.0346821	0	0	0	0	0.0159678	0	0
C4BPA	0	0.0426024	0	0.0162368	0	0.0111916	0	0.0952372	0	0	0	0
CD55	1.20414	1.55772	9.14374	0.538178	3.40016	1.89806	1.81715	0.634154	5.94531	2.00921	0.532532	2.88896
CR1	0.249487	0.0235708	0.11169	0.0115199	0	0	0.0787904	0.230754	0.207089	0.0255152	0	0.171641
CR1L	0.0228827	0	0	0.0280089	0	0	0.00511051	0	0	0	0	0
CD46	0.731042	0.529471	0.952792	0.639749	0.529924	0.637844	0.822012	0.602236	1.01106	0.896518	1.19968	0.935281
CD34	0.0421011	0.0154841	0.0250904	0.00380872	0.0312435	0.0174075	0	0.00746793	0	0.137609	0.111013	0
PLXNA2	0.0629036	0.0500626	0.0254555	0.0162339	0	0.0109833	0	0	0	0.0590104	0	0
CAMK1G	0.0143576	0	0	0	0	0.00891893	0	0	0	0	0	0
LAMB3	0.00700881	0.0660688	0.0821846	0.224204	0.0100485	0.112343	0.0640347	0.0722526	0.0225715	0.0310078	0	0.032317
RP1-28O10.1	0	0.010145	0	0	0	0.043259	0.0394421	0	0	0.0141911	0	0
G0S2	5.60197	8.53347	19.3522	16.2844	0.12052	5.01057	1.22216	6.59583	5.62878	3.77784	0.330489	2.00726
HSD11B1	0	0.0142535	0.0166545	0	0	0	0	0.227992	0	0	0	0
TRAF3IP3	0.177386	0.313191	0.232506	0.26183	0.171137	0.0689391	0.880255	0.223423	0.888514	0.218483	1.25022	0.492693
C1orf74	0	0.0107256	0	0.0171564	0.0096918	0.0138472	0	0	0	0	0	0
IRF6	0.0206652	0.0306914	0	0.0880674	0.00848112	0.0138472	0.0453213	0.0879109	0	0.0159678	0	0
DIEXF	0.0336481	0.0209503	0.0299516	0.0214563	0.0322068	0.0124524	0.124449	0.118173	0.0389299	0.0131691	0	0.156918
SERTAD4-AS1	0	0.0176067	0.0177139	0.0204086	0.00602526	0	0	0	0.0314608	0	0	0
HHAT	0.00397253	0.0103673	0.0140037	0	0.00896363	0.00467954	0	0	0	0	0.0608761	0.026943
RCOR3	0.175571	0.148256	0.106738	0.19724	0.241946	0.0715818	0.223837	0.0743688	0.419552	0.162197	0.247613	0.218882
TRAF5	0.214845	0.228684	0.129766	0.136932	0.0481937	0.514736	0.0919546	0.0548181	0.0631225	0.30675	0.517874	0.274125
SLC30A1	0.252653	0.159224	0.0601998	0.248654	0.0865976	0.142836	0.204317	0.231509	0.269886	0.0150259	0.076067	0.0904997
NEK2	0	0.00425845	0	0.111127	0	0.0173532	0	0	0	0	0	0
RP11-122M14.1	0	0.009995	0	0.0060485	0	0	0	0.030014	0	0	0	0
LPGAT1	0.36313	0.361025	0.503483	0.283843	0.480436	0.639426	0.452764	0.213488	0.331449	0.569689	0.4982	0.355412
INTS7	0.0184248	0.0509494	0	0.0285103	0.0927979	0.0265672	0.0798999	0.0414298	0	0.0317071	0.140574	0.138249
DTL	0.00220144	0.0441203	0	0.0562238	0.0104194	0.0201804	0	0	0	0.0290083	0	0.0461096
PPP2R5A	0.155191	0.217592	0.230149	0.149505	0.20832	0.214295	0.509737	0.34892	0.372885	0.235458	1.14824	0.528062
TMEM206	0.167825	0.171509	0.0986919	0.26478	0.155639	0.149841	0.144097	0.115282	0.107671	0.0727667	0.076067	0.0340209
NENF	1.22898	0.947349	0.507671	1.36127	1.19045	0.959537	0.89343	2.58416	0.664979	1.77633	0.426636	0.86804
RP11-61J19.4	0.00314089	0	0.0299234	0	0	0	0	0	0.0300149	0.0352327	0	0
ATF3	3.69933	1.30079	1.86108	2.17439	1.48727	1.19339	0.624046	1.01678	1.30195	4.11694	1.4647	1.0853
FAM71A	0.00491544	0.0129274	0.00918238	0.00687695	0	0	0	0	0.0544314	0	0	0
RP11-338C15.3	0.01096	0	0.0239411	0.0114929	0.00992999	0.00843233	0	0	0	0	0	0
BATF3	0.224885	0.181975	0.132317	0.0847383	0.0399078	1.41931	0.248374	0	0.492454	0.0979282	0	0.127622
NSL1	0.40149	0.345622	0.219709	0.598744	0.483867	0.299397	0.332272	0.287262	0.568206	0.392576	0.229559	0.609788
TATDN3	0.160242	0.128259	0.0572622	0.160929	0.705095	0.11776	0.138722	0.075855	0.326917	0.174992	0.0825246	0.0393915
C1orf227	0.0181099	0	0	0	0	0	0	0.00746793	0	0	0	0
FLVCR1-AS1	0.00754752	0.0166441	0	0.0140733	0.0631177	0	0.0357762	0	0.0347991	0	0	0
FLVCR1	0.0767237	0.118217	0.0866014	0.113736	0.154656	0.120143	0.0338293	0.0224092	0.0847108	0.18272	0	0.0488118
VASH2	0.0200672	0	0	0	0.784069	0	0	0	0	0.115153	0	0
ANGEL2	0.13596	0.146188	0.115182	0.115493	0.256801	0.176908	0.136251	0.0760367	0.0575753	0.260316	0.327225	0.0940611
RPS6KC1	0.161119	0.101265	0.132581	0.0506834	0.094288	0.150165	0.0416298	0.0425652	0.240797	0.197365	0.120292	0.0721237
PROX1	0	0.00277059	0.00598746	0	0	0	0	0	0	0.0620871	0	0
SMYD2	0.0864421	0.0603867	0.0443352	0.12438	0.177515	0.0448395	0.121769	0.311468	0.0391242	0.160161	0	0.115612
PTPN14	0.0197442	0.00926593	0.0137822	0.0101181	0.0204295	0.0103165	0	0	0	0.197362	0	0
CENPF	0.103648	0.0536332	0.08659	1.02288	0.0476472	0.156636	0.010221	0.0224092	0	0.21073	0.0699868	0.294975
KCTD3	0.080968	0.044476	0.0553429	0.0134774	0.011661	0.0416882	0	0.070387	0.0739233	0.0808087	0.191974	0.0478135
ESRRG	0.0036683	0.00880786	0.0137765	0.00838106	0	0.0152623	0	0	0	0.0268011	0	0
GPATCH2	0.190522	0.148423	0.0433109	0.129191	0.172086	0.0687616	0	0.068637	0.0978851	0.434931	0.252313	0.224586
SPATA17	0.00494481	0.00672375	0	0.00712869	0	0	0	0	0.0294586	0.0141911	0	0.0482707
RRP15	0.116747	0.179245	0.10451	0.224842	0.0880385	0.0317106	0.128157	0.544392	0.217251	0.190747	0.212093	0.166053
TGFB2	0.0625475	0.0222871	0	0.0272724	0.0119554	0	0.00511051	0	0	0.0665201	0	0
LYPLAL1	0.222205	0.158458	0.235431	0.347046	0.107555	0.132375	0.386263	0.635661	0.468601	0.148944	0.0707489	0.405588
EPRS	0.518223	0.451504	0.380782	0.393063	0.280928	0.569501	0.292016	0.235943	0.311951	0.463801	0.584039	0.573597
BPNT1	0.0556	0.0740569	0.031697	0.0597594	0.0546004	0.0328802	0.121514	0	0.102212	0.0803714	0.0825246	0.137276
IARS2	0.300643	0.2211	0.256286	0.270093	0.322438	0.146856	0.299628	0.208082	0.0222489	0.202836	0.186191	0.210278
RAB3GAP2	0.171755	0.131072	0.24051	0.128778	0.231582	0.157688	0.21357	0.024164	0.322986	0.263785	0.208272	0.232013
MARK1	0.00494481	0	0	0.0225869	0	0.00988296	0	0	0	0.053945	0	0
C1orf115	0	0.0169445	0.0160629	0.0363263	0	0.0266499	0	0	0	0	0	0
2019-03-02	0.00582289	0.00903755	0	0.0233256	0	0.00767702	0	0	0	0	0	0
2019-03-01	0.0110578	0.00726871	0.0708074	0	0	0	0.261275	0.0374877	0	0.0485476	0	0
HLA-AS1	0.00344111	0	0.0116695	0	0.00769438	0	0	0	0	0	0	0
HLX	0.139591	0.215636	0.167917	0.0749415	0.103232	0.0933671	0.300492	0.245312	0	0.0582366	0	0.0736013
DUSP10	0.237728	0.409102	0.105463	0.387583	0.0928176	0.250089	0.100454	0.706838	0	0.0709661	0.889704	0.163764
RP11-400N13.3	0	0	0	0	0	0.00467954	0	0.0448183	0	0.0135142	0	0
TAF1A	0.0182479	0.00351524	0.0196329	0.033906	0.0217705	0.0265751	0	0.0300971	0.122686	0.0518853	0	0.0255989
MIA3	0.586566	0.40345	0.290595	0.261431	1.09136	0.742989	0.395401	0.169662	0.375494	1.02405	0.351569	0.420589
RP11-378J18.8	0.00550872	0	0	0	0.0141054	0.00843233	0	0.0225978	0.0272804	0.0714299	0	0
AIDA	0.421267	0.320281	0.224385	0.405396	0.98769	1.31227	0.33131	0.119774	0.349547	0.433616	0.584726	0.361158
BROX	0.674539	0.438442	0.508222	0.634084	0.453352	0.447955	0.616084	0.397056	0.752019	0.323878	0.21647	0.624383
FAM177B	0.0226825	0.00351524	0	0.00279669	0.0745546	0	0	0	0	0	0	0
RP11-452F19.3	0.159414	0.130456	0.0669819	0.0581783	0.178045	0.125357	0.0511279	0.0132215	0.0618562	0.0748654	0.0590797	0.102746
DISP1	0.0311711	0.0423691	0	0.00722421	0.0665594	0.0193005	0.0394421	0	0.0306463	0.0141911	0.0526319	0
TLR5	0.266377	0.0880472	0.241981	0.112551	0.00976362	0.054883	0.357	0.0406839	0.218554	0.112917	0	0.391539
CAPN8	0.0209498	0.0191842	0.0190736	0	0.0122834	0	0	0	0	0	0	0
CAPN2	0.220541	0.190621	0.773423	0.182302	0.17489	0.479719	0.913044	0.257352	0.904889	0.588852	0.127228	0.677664
TP53BP2	0.750634	0.233465	0.640468	0.0870111	0.23706	0.620414	0.331985	0.0853008	0.168812	0.834895	0.205143	0.820132
RP11-504P24.8	0.0071863	0.0118011	0	0.0134085	0	0	0	0	0.0297283	0	0.0696709	0.032317
RP11-504P24.4	0.00704763	0.00583218	0.0146663	0	0	0.0128454	0	0	0	0	0	0
FBXO28	0.177653	0.10686	0.11897	0.219255	0.138047	0.128785	0.0966447	0.121499	0.12657	0.0837274	0.0963753	0.090768
DEGS1	0.62936	0.810939	0.314064	1.23798	0.434035	0.707356	0.0501472	0.485837	0.540626	0.615386	0.581855	0.651395
RP11-365O16.6	0	0.00425845	0	0	0	0.00998052	0	0	0	0.0135142	0	0
NVL	0.127436	0.0318999	0.0170968	0.137495	0.0684609	0.0878018	0.0985914	0.0560811	0.176931	0.0714148	0	0.0465248
CNIH4	0.395576	0.574955	0.862692	0.615215	0.256372	0.24112	0.667745	0.699047	4.44287	0.637419	0.27486	0.722964
WDR26	0.432655	0.222916	0.601897	0.353173	0.593022	0.179995	0.399988	0.379448	1.30812	0.31219	0.343936	0.434724
CNIH3	0.0030714	0.00522624	0	0.0347957	0.0164512	0.0200841	0	0.1985	0	0.025641	0.105264	0
RP11-100E13.1	0	0	0	0	0	0	0	0.0809409	0	0	0	0.0253306
DNAH14	0.0191983	0.0434341	0.0140508	0.0380231	0.0109318	0.00467954	0.0521053	0.00575353	0.0340483	0.0997743	0.0585381	0.0419662
LBR	0.797664	0.57983	0.779569	0.903393	0.866186	0.937311	0.941157	0.310741	0.337169	0.85691	0.540307	1.29372
ENAH	0.0284764	0.0248562	0.0199837	0.0361426	0.0444357	0.0290781	0	0	0	0.514146	0	0
SRP9	1.20949	1.51529	1.00219	2.06931	1.22813	1.0713	1.1563	1.61763	1.02902	2.16757	1.28264	1.33049
EPHX1	0.0800071	0.0410262	0.0924478	0.124453	0.145696	0.0166611	0.0306657	0.812538	0.0611277	0.22182	0.135876	0
RP11-285F7.2	0.0121057	0.00727024	0.00299373	0.00237324	0.0364544	0	0	0.0252604	0.0234471	0	0	0
TMEM63A	0.118026	0.135484	0.0441251	0.0101396	0.299359	0.0482479	0.141524	0.178174	0.129592	0.0646426	0.581424	0.202129
LEFTY1	0.00545379	0.0901841	0	0.137235	0.0338904	0.0102084	0.136565	0.125089	0.0804591	0	0.102709	0
PYCR2	0.38366	0.267581	0.133046	0.365514	0.512365	0.248683	0.170375	0.264768	0.275607	0.235779	0.841155	0.328795
SDE2	0.30841	0.154561	0.205129	0.0940946	0.401826	0.106854	0.123852	0.149742	0.259524	0.231212	0.415514	0.207837
H3F3A	16.6002	16.3513	24.6361	15.4555	11.4818	15.4647	23.1655	9.10499	22.2449	18.2283	14.5487	18.7455
ACBD3	0.472344	0.326685	0.333473	0.528469	0.37552	0.360059	0.357674	0.292968	0.444596	0.706368	0.382573	0.408786
LIN9	0.00956493	0.0140738	0	0.0956562	0.0360359	0	0.0474158	0.0357675	0	0.0141978	0.0806205	0
PARP1	1.07966	0.80539	0.284498	1.47139	0.774639	1.31559	0.230665	0.436073	0.635518	0.774971	0.721775	1.45439
ITPKB	0.185486	0.0387643	0.0147798	0.0260205	0.0418116	0.0368754	0.023892	0.280827	0.0651312	0.0923695	0.472431	0.102019
ITPKB-AS1	0.0291361	0	0	0	0	0	0	0.0263888	0.0297283	0	0	0
PSEN2	0.0428756	0.0621934	0.0131474	0.0553388	0.0120649	0.234343	0	0.214578	0	0	0.220142	0.026943
ADCK3	0.0793568	0.0714631	0.0515809	0.0619656	0.0103636	0.0317377	0.0811852	0.128097	0.0962108	0.0188184	0.40798	0
CDC42BPA	0.051076	0.100047	0.0315307	0.0451843	0.0598761	0.0785639	0.0444824	0.0292005	0	0.386054	0	0
ZNF678	0.0260809	0.0289155	0.0171685	0.0298506	0.0185986	0	0	0	0	0.03932	0	0
SNAP47	0.0616854	0.122628	0.0514791	0.0657466	0.0729844	0.0980438	0	0.00575353	0.0785268	0.0745384	0	0.0525419
JMJD4	0.0405752	0.0749251	0.032118	0.0370692	0.0539875	0.0249399	0	0.0378761	0.0294586	0.073983	0.0714725	0.145967
WNT9A	0	0	0.0158195	0	0	0	0	0	0	0.0679684	0.0676599	0
ARF1	2.15851	1.94831	2.0648	2.36683	2.58696	1.58361	1.84445	2.10404	1.80152	2.38236	1.8664	1.91831
C1orf35	0.224663	0.282248	0.219267	0.524867	0.317557	0.345307	0.278749	0.156948	0.433065	0.135127	0.119233	0.404039
MRPL55	0.488788	0.744016	0.473305	0.974379	0.574259	0.620271	0.690164	0.532202	0.325745	0.734969	0.578895	0.283824
GUK1	2.62078	2.40908	2.84231	2.51671	3.81269	1.56696	2.33854	3.83825	1.74996	2.93279	2.31823	3.05812
GJC2	0	0	0.0094883	0.0213385	0	0	0	0	0	0	0	0
IBA57	0.104107	0.00550096	0.0500293	0.101126	0.0213272	0.024682	0.0346991	0.00575353	0.089065	0.0278007	0.0825246	0.112005
OBSCN	0.0141477	0.0147478	0	0	0.00807937	0	0.0957113	0	0	0	0	0.0916809
TRIM11	0.0965436	0.0559967	0.140016	0.0939122	0.161774	0.142307	0.13829	0.0225978	0.0431749	0.0826913	0.256516	0.128129
TRIM17	0.00399931	0	0.018271	0	0	0.0359168	0	0	0	0.0428883	0	0.0211942
HIST3H2A	0	0	0.0180035	0.00754953	0	0.0107694	0	0	0.0577533	0	0	0
RNF187	0.45404	0.49245	0.452803	0.683227	0.379554	0.314535	0.41692	0.260502	0.771395	0.411256	0.21222	0.638237
RHOU	0.287847	0.0635665	0.258726	0.112951	0.182788	0	0.121226	0.108935	0	0.40202	0	0
RAB4A	0.485273	0.497499	0.270813	0.670181	0.717285	0.566206	0.374293	0.79619	0.269563	0.314381	0.113933	0.653375
CCSAP	0.28838	0.102966	0.0310227	0.190997	0.114175	0.139687	0.166107	0.0396629	0	0.220087	0.302005	0.210217
NUP133	0.0724373	0.101733	0.0547135	0.0597391	0.0613288	0.024033	0.0365173	0.0449936	0.0285124	0.0869795	0.0825246	0.090778
ABCB10	0.11557	0.0951155	0.0325267	0.062063	0.0560482	0.0521833	0.0535608	0.0312786	0.0718029	0.027821	0.123381	0.0567299
TAF5L	0.151421	0.0615235	0.0421678	0.0908171	0.0851152	0.123859	0.0346854	0.0963653	0.130468	0.0609803	0.0524753	0.0993557
URB2	0.0151251	0.0207104	0.00299373	0.0151461	0.0217932	0.00998052	0.0521053	0	0	0.0853106	0.150595	0
RP11-552D4.1	0.0101187	0.00633234	0.0176285	0.0533756	0	0	0	0	0	0	0	0
GALNT2	0.190234	0.167942	0.186303	0.143134	0.43316	0.135929	0.180938	0.178767	0.184598	0.142551	0.231848	0.418639
PGBD5	0.0101016	0	0	0.0158781	0.00954627	0	0	0	0	0.134406	0	0
COG2	0.119072	0.120591	0.0480493	0.0643256	0.101845	0.077178	0.140569	0.0538483	0.220757	0.0684214	0.28845	0.134078
C1orf198	0.0221554	0.0148741	0.0247858	0.0371176	0	0.0326902	0	0.0624227	0.0391242	0.0742304	0.214012	0.0525419
TTC13	0.021761	0.0802126	0.035469	0.0550538	0.138022	0.106655	0.0749303	0	0.0264794	0.0389935	0.102709	0.167847
ARV1	0.0633439	0.0667427	0.0153782	0.0864442	0.142068	0.0640512	0.0265776	0.102084	0.0654253	0.113176	0.0961501	0.0255989
FAM89A	0.0272637	0.00278289	0.180167	0.0113901	0.0108071	0	0.023084	0.111014	0.0570249	0.135716	0	0.0255989
C1orf131	0.183273	0.184095	0.102243	0.183451	0.139388	0.15752	0.42854	0.150131	0.3254	0.173725	0.248914	0.481466
GNPAT	0.139736	0.198459	0.0811731	0.244941	0.183988	0.105542	0.337907	0.251263	0.296516	0.192016	0.102709	0.271846
EXOC8	0.075283	0.0392553	0.0159809	0.026603	0.0801118	0.0763131	0.0796166	0.0278243	0.161668	0.0475439	0.076067	0.155817
SPRTN	0.10824	0.0794801	0.0792461	0.0507562	0.0763674	0.0951982	0.0723826	0.123272	0.153846	0.148369	0.198226	0.0600876
EGLN1	0.268072	0.383716	0.232407	0.312329	0.136671	0.264674	0.213113	0.206043	0.156745	0.156749	0.436273	0.243459
RP11-295G20.2	0.0462315	0.111381	0.284001	0.0673427	0.0305678	0.0308792	0.387626	0.00856816	0.230314	0.12452	0	0.179536
TSNAX	0.355133	0.293677	0.263748	0.352214	0.206307	0.187418	0.250762	0.360397	0.345629	0.16321	0.360583	0.197582
LINC00582	0	0.026643	0	0	0	0.0350829	0	0	0	0	0	0
DISC1	0.127194	0.0405186	0.0945404	0.0941803	0.0486988	0.0720844	0.0668075	0.135368	0.12798	0.0380073	0	0.0673361
SIPA1L2	0.196934	0.096832	0.103025	0.124804	0.0480866	0.0331997	0.0911546	0.0911215	0.0541679	0.159447	0	0.131982
MAP10	0.0223395	0.051118	0.0166894	0.00515228	0.0251277	0	0	0.021972	0	0.011324	0.0773377	0
NTPCR	0.174251	0.182315	0.097553	0.260902	0.155086	0.114631	0.244648	0.444205	0.122939	0.284552	0.200277	0.0730526
PCNXL2	0.0648824	0.0758481	0.0215755	0.0594521	0.0200931	0.0664737	0.0265776	0	0	0.0848652	0	0.21524
MLK4	0.0360643	0.0265852	0.0094883	0.0225927	0.0391249	0.0102734	0.0444261	0.0518339	0	0.0172267	0	0
KCNK1	0.0273059	0.0188784	0.0274854	0.0167621	0.0420039	0.0261902	0.0402013	0.0600078	0	0.302813	0	0
SLC35F3	0.0112014	0.00371742	0	0.0314609	0.443465	0	0	0	0	0.0322441	0	0
RP5-827C21.4	0.0282605	0.0338364	0	0.0392678	0.0104541	0.017218	0	0	0.11872	0.0932823	0.0714725	0.128874
COA6	0.383382	0.449042	0.329459	0.486626	0.166198	0.191344	0.300072	0.414909	0.385704	0.36741	0.240133	0.373169
TARBP1	0.17393	0.0945383	0.0594253	0.120121	0.369442	0.109054	0	0.00856816	0.0347991	0.135764	0.135	0.162923
IRF2BP2	1.16571	1.03464	1.00246	0.760252	4.01009	0.750963	0.85839	0.831035	0.623702	1.7181	1.24787	1.47549
RP4-781K5.2	0.00749717	0.0036034	0	0.00302652	0	0	0	0	0	0.00850602	0	0
RP11-443B7.1	0.0591987	0.0515908	0.127325	0.052379	0.150338	0.0190876	0.0948317	0.143586	0	0.0978223	0.13419	0.046295
RP11-443B7.3	0.00366254	0.00818873	0.0419988	0.00626192	0.0116805	0	0.0866826	0	0	0.011324	0	0.0255989
RP4-597N16.4	0.00258012	0.0114637	0	0	0.00720471	0	0	0.0285216	0	0	0	0
TOMM20	1.37519	1.39696	1.35059	0.9682	1.75337	1.17023	1.02047	0.90624	1.21966	1.48085	1.09476	0.778151
RBM34	0.138396	0.122063	0.0679608	0.107826	0.112769	0.12146	0.010221	0	0.126749	0.110281	0.0524753	0.176002
ARID4B	0.782539	0.802512	0.797926	0.688065	1.3308	0.999153	0.655912	0.373759	0.54066	1.17671	1.40012	1.73757
GGPS1	0.202127	0.248652	0.239561	0.271635	0.295557	0.189079	0.12878	0.320367	0.183138	0.375703	0.276336	0.611698
TBCE	0.0573303	0.0439541	0.0152928	0.052957	0.0616749	0.0188375	0.0798376	0.144033	0.0278214	0.0495876	0.0526319	0.0858764
B3GALNT2	0.109939	0.0747593	0.0701622	0.113278	0.0548333	0.0631902	0.023892	0.0278457	0.100042	0.26031	0.311443	0.0675651
GNG4	0	0	0	0.0114929	0	0	0	0	0	0.0518853	0.139342	0
LYST	0.243243	0.497312	0.952093	0.178075	0.301158	0.537107	1.89528	0.268074	3.82075	0.899883	0.349335	1.20829
NID1	0.0403106	0.0120203	0.049207	0.00752552	0.0317348	0.069811	0	0	0.119105	1.21	0	0.0214317
GPR137B	0.710928	0.661367	0.104723	0.685171	0.0295094	0.565201	0.151299	0.413833	0.369161	0.164231	0.0696709	0.624668
ERO1LB	0.441872	0.171359	0.238407	0.258399	0.523397	0.314719	0.242894	0.024164	0.238022	0.26043	0.194276	0.319036
EDARADD	0.00325989	0.00402225	0	0	0.00804861	0.0126257	0	0	0	0.0273244	0	0
LGALS8	0.361137	0.345141	0.507542	0.386529	0.269414	0.027257	0.473756	0.204084	0.182221	0.143862	0.167623	0.413914
RP11-385F5.5	0.00865461	0.00658508	0	0.00754374	0.0359965	0	0	0	0	0	0	0
HEATR1	0.0760207	0.103015	0.064776	0.0375338	0.495254	0.0426929	0.0944271	0.021972	0.11953	0.221161	0.0791221	0.0862945
MTR	0.252427	0.294067	0.138678	0.150003	0.414007	0.093365	0.102416	0.0962909	0.176688	0.257853	0.295869	0.343541
FMN2	0	0.00622545	0	0	0.0101631	0	0	0	0	0.0288307	0	0.0482707
GREM2	0	0.00277059	0	0	0	0.00559382	0	0	0	0.110986	0	0
RGS7	0	0	0	0	0.358378	0.00982363	0	0	0	0.159815	0	0
FH	0.262467	0.213805	0.205886	0.290807	0.330224	0.193793	0.274353	0.181102	0.0804591	0.219572	0.257619	0.322492
KMO	0.193181	0.0709679	0.118759	0.184354	0.345188	0	0	0.473668	0.114759	0.0929567	0.076067	0.0596198
OPN3	0.574077	0.42366	0.217918	0.474426	5.69939	0.30633	0.124242	0.430753	0.239459	0.557669	0.313558	0.505427
CHML	0.714742	0.342611	0.464702	0.282144	4.39006	0.19712	0.251534	0.215443	0.323838	0.585239	0.0714725	0.398954
WDR64	0.00270881	0.0220797	0	0	0.233157	0	0	0	0	0.0702433	0	0
EXO1	0.00220144	0	0	0.0673558	0	0.00733504	0.010221	0	0	0.0290083	0	0.0137926
RP11-261C10.3	0.00314089	0	0.0324893	0	0.0307781	0	0.023892	0	0	0.0141978	0	0
CEP170	1.71223	0.499177	0.950442	0.5425	0.444171	0.67969	0.367109	0.337939	0.312116	0.676529	1.10485	0.683328
SDCCAG8	0.706799	0.539912	0.354024	0.638869	0.391023	0.33706	0.736034	0.261272	0.440932	0.263495	0	0.455061
AKT3	0.0296022	0.0188357	0.0461016	0.0326497	0.0543945	0.0155344	0.0521053	0.091494	0.0716874	0.107223	0.357935	0.0393915
ZBTB18	0.0938694	0.0614141	0.115868	0.0634519	0.810671	0.0261902	0.148527	0.0369408	0.0742085	0.0575765	0	0.146887
ADSS	0.566775	0.610417	0.433786	0.438648	0.295685	0.564423	0.602205	0.689531	0.633917	0.79941	0.974373	1.00539
DESI2	0.29095	0.23376	0.206849	0.230173	0.314105	0.369346	0.0634811	0.195514	0.072277	0.317249	0.309569	0.220766
COX20	0.685344	0.623514	0.37985	1.14355	0.51389	0.345688	0.510667	0.670934	0.570061	0.364353	1.19388	0.591866
HNRNPU-AS1	0.570541	0.139734	0.434592	0.215946	1.00488	0.186498	0.322041	0.226421	0.25539	0.74523	0.135	0.296066
HNRNPU	3.23139	2.47376	3.44761	2.42672	3.4905	2.28514	3.01565	1.43707	2.80431	4.05176	4.13122	3.37177
RP11-156E8.1	0.0291931	0.00494093	0.0465105	0.00783285	0.0490659	0	0	0.00746793	0.0278214	0.0172267	0	0
EFCAB2	0.0702718	0.071973	0.0818839	0.170161	0.0920283	0.164116	0.147787	0.352233	0	0.0647238	0.144853	0
KIF26B	0.0305767	0.00833521	0.0163351	0.0128225	0	0.023465	0	0	0	0.139472	0	0.0255989
SMYD3	0.0949654	0.321561	0.0514706	0.0839972	0.104589	0.0565636	0	0.0748175	0.088586	0.158576	0.233265	0.144496
TFB2M	0.0482255	0.0585512	0.0145407	0.0406559	0.0668393	0.0565357	0.0888862	0.00856816	0.0647889	0.053892	0	0.097486
CNST	0.188979	0.163311	0.188279	0.0831265	0.213565	0.0885619	0.0894767	0.0636132	0.213679	0.174317	0.0590797	0.120584
SCCPDH	0.184391	0.244509	0.128511	0.543141	0.268925	0.121052	0.184317	0.652426	0.3265	0.391842	0.573536	0.193219
AHCTF1	0.248122	0.169888	0.295859	0.101366	0.160002	0.180711	0.157578	0.0890464	0.294085	0.337602	0.451127	0.188778
ZNF670	0.0170364	0.0228074	0.0623685	0.0520185	0	0	0.0265776	0.0363745	0	0.058232	0	0
ZNF695	0.00325989	0.0132878	0	0.026202	0	0	0	0	0	0	0	0
ZNF669	0.0773967	0.0844291	0.0431823	0.114815	0.0634831	0.0753334	0.0409136	0.0144025	0.0391242	0.0529683	0.320265	0
ZNF124	0.109417	0.145017	0.16261	0.116201	0.0735548	0.138578	0.131026	0.0961704	0.127082	0.197162	0	0.0852187
RP11-488L18.10	0.131024	0.0997951	0.167266	0.104194	0.186944	0.153625	0.0346991	0.0485074	0.131695	0.298674	0.327347	0.16125
RP11-488L18.8	0	0.00278289	0.00821726	0	0.0148181	0.00998052	0	0	0	0	0	0
ZNF496	0.0387489	0.0123805	0.0607869	0.0404717	0.0597762	0.0565115	0	0.0149359	0	0.0994403	0.0705871	0
NLRP3	3.62729	1.08438	5.40896	0.453573	0.0501674	0.983444	1.46273	0.200666	1.36254	2.36426	0.505425	3.07792
GCSAML	0	0.176375	0	0.0101836	0	0	0	0.0299107	0	0	0	0
OR2C3	0	0.0106741	0	0	0.0221558	0	0	0	0	0.0159678	0	0
TRIM58	0	0.0207612	0.0110394	0.0163548	0.0108071	0	0.0299383	0	0	0	0.0608761	0.163591
SH3BP5L	0.0153216	0.0331816	0.0094883	0.0571911	0.0401469	0.0224192	0.00511051	0.0346717	0.0225715	0.0136232	0	0.163104
ZNF672	0.233366	0.24748	0.202925	0.269912	0.378461	0.259321	0.163248	0.205004	0.130412	0.141992	0.166046	0.0564508
ZNF692	0.0348956	0.0453796	0.013423	0.102137	0.0181999	0.0870477	0.0306657	0.0438818	0.0647859	0.0468451	0	0.108225
PGBD2	0.0275079	0.0661422	0.0324276	0.0260827	0.0251237	0.0233129	0.0338293	0.0300971	0.0305968	0.0754379	0.115599	0
FAM110C	0.00777579	0.0168187	0.0146663	0.00421749	0.0103636	0	0	0	0	0	0	0
SH3YL1	0.151643	0.1312	0.0488085	0.26811	0.139886	0.204226	0.00511051	0.131888	0	0.111534	0.31019	0.0832575
ACP1	0.669219	0.948316	0.63203	0.908443	0.807203	0.525165	0.874694	1.31287	0.79017	0.597597	1.02635	0.537788
FAM150B	0	0.00243119	0	0.00417787	0	0	0	0.10737	0	0	0	0
TMEM18	0.27643	0.280006	0.19066	0.214311	0.260575	0.139637	0.314164	0.129767	0.328872	0.336859	0.308503	0.153319
PXDN	0.0176595	0.0234672	0.0288712	0.00515228	0.0941266	0.0262557	0	0.0224092	0	0.487419	0.0524753	0
MYT1L	0.0101626	0.00334654	0	0	0	0	0	0	0	0	0	0
TSSC1	0.192208	0.131397	0.0644342	0.205552	0.286367	0.280118	0.175604	0.196866	0.223339	0.164289	0.913673	0.226892
TRAPPC12	0.187343	0.254858	0.176991	0.186552	0.199085	0.131163	0.144677	0.226817	0.349558	0.203596	0.191666	0.032317
TRAPPC12-AS1	0.00270881	0.0174767	0	0.0135456	0	0.00982971	0	0	0	0.00854745	0	0
ADI1	0.628012	0.752511	0.664069	0.81486	1.06808	0.414257	0.940069	0.819905	1.00078	0.830364	1.0542	0.648858
AC142528.1	0	0.00632131	0.0211513	0.0122707	0.00965372	0	0	0	0.0275382	0	0	0
AC108488.4	0.0140649	0	0	0.0076946	0.0104541	0	0.0352995	0.102288	0	0	0	0
RNASEH1	0.0845588	0.175331	0.178458	0.131119	0.23171	0.159667	0.0331045	0.227953	0.119941	0.141017	0.174935	0.139046
RNASEH1-AS1	0.0377268	0.0237598	0.00950372	0.046267	0.024196	0.0204023	0.129213	0.0624227	0.063529	0.0170949	0.153112	0.0481372
RPS7	13.4088	19.6732	18.8434	12.0831	21.5056	22.064	20.0167	12.6183	17.3056	18.5817	23.5226	17.097
AC017076.5	0.0033518	0.009966	0	0	0	0	0.0492252	0	0	0.00854745	0	0
CMPK2	0.0470493	0.0432928	0.0771699	0.13409	0.00947858	0.00998052	0.0709876	0.118917	0.0557765	0.041327	0	0
RSAD2	0.122523	0.0261448	0.0379454	0.141019	0.0145875	0	0.0484503	0.134994	0.0911935	0.021966	0	0
RNF144A	0.0231849	0	0.0160982	0.00279669	0.00720471	0.0241205	0	0	0	0.136391	0.126579	0.0478135
AC092580.4	0.0944942	0.09934	0.0779503	0.109834	0.0933332	0.102423	0.107911	0.207196	0.0999542	0.115871	0.477296	2.22225
LINC00299	0	0.0058709	0	0	0	0	0	0	0.0225715	0	1.83963	0.0728231
AC011747.3	0.00826967	0	0	0	0	0	0.00511051	0	0	0	0	0
AC011747.4	0.0094586	0	0	0.00279678	0.0112874	0.0789795	0	0	0	0	0	0
ID2	6.13595	5.82012	3.59303	8.7427	2.02407	15.9654	3.28453	0.976437	4.36143	3.21018	26.5602	8.37758
KIDINS220	0.473881	0.229098	0.431647	0.217137	0.24845	0.369369	0.2657	0.302923	0.496465	0.719272	0.644804	0.296088
MBOAT2	0.0131251	0.076361	0.0285679	0.0565797	0	0.174835	0.0957146	0	0.0351815	0.177123	0.247039	0
ASAP2	0.034824	0.0586467	0.0218435	0.054066	0.421567	0.0933614	0	0.0625363	0	0.088106	0	0.0393915
ITGB1BP1	0.379351	0.339956	0.28993	0.492711	0.284478	0.353043	0.147704	1.68976	0.712234	0.449967	0.518249	0.307169
CPSF3	0.148731	0.125214	0.0986316	0.206944	0.203456	0.206166	0.129098	0.0465182	0.127769	0.168713	0.120962	0.0946216
IAH1	0.780162	0.731203	0.810633	0.772635	0.644825	0.555484	0.722781	0.81056	1.38179	0.481861	0.864234	0.638274
ADAM17	0.760403	0.61524	0.68915	0.389272	0.331354	0.268184	0.663701	0.496495	1.30886	0.466685	0.280737	0.460578
RP11-214N9.1	0.0310565	0.00314854	0	0.00376113	0	0	0.0613314	0	0.070585	0.0172267	0	0
YWHAQ	0.961342	1.56169	0.830175	1.48967	0.809335	0.877421	0.699552	1.44168	0.664156	2.0065	2.94827	1.29201
TAF1B	0.127066	0.0889785	0.205792	0.0921345	0.0857413	0.0901729	0.194106	0.123317	0.199738	0.155949	0.0696709	0.160672
RP11-95D17.1	0.0309912	0.0110451	0	0.014835	0.00848112	0.00982363	0	0.0298263	0	0.0330163	0	0.0214317
GRHL1	0.0140124	0.00280587	0	0.0349944	0.00683681	0	0	0.0496086	0	0	0.065229	0
RP11-254F7.2	0.0389078	0.0132656	0.0738282	0.0314971	0	0.0254141	0.0352995	0.0285216	0.0722208	0.0371691	0.358759	0.0784748
KLF11	0.126335	0.0629041	0.0995404	0.0767237	0.0252467	0.0272438	0.115822	0.0344014	0.158412	0.146344	1.03305	0.0619621
RRM2	0.0516681	0.0506888	0.0301611	0.822959	0.0165605	0.0266846	0.0484361	0	0	0.100397	0.0666014	0.378682
C2orf48	0	0	0	0.00521136	0	0	0	0	0	0	0	0.0137926
HPCAL1	0.457934	0.533541	0.476684	0.627919	0.38914	0.226588	0.586304	0.75603	0.634174	0.644919	0.452458	0.559443
ODC1	0.230621	0.198181	0.111668	0.199559	0.838601	0.384369	0.122528	0.174376	0.25421	0.559361	0.320346	0.350341
NOL10	0.17139	0.152016	0.133693	0.287616	0.113565	0.148228	0.31663	0.0533349	0.0529057	0.264816	0.411919	0.116109
RN7SL832P	0.00314089	0.0155293	0.00476735	0.0558155	0.0370657	0	0.0323389	0	0	0.0331945	0	0
ATP6V1C2	0.00443206	0.0373109	0	0	0	0.0213653	0.039336	0.0238107	0.100252	0	0.0707489	0
PDIA6	2.25071	2.10071	1.50854	2.61601	1.83537	1.18198	1.25431	1.91064	1.28885	2.70724	1.94048	1.49898
PQLC3	0.444808	0.421456	0.398826	0.558242	0.202094	0.44994	0.379717	1.00316	1.02287	0.472627	0.321267	0.612386
ROCK2	0.186482	0.123871	0.242609	0.112543	0.187291	0.119046	0.0306925	0.320786	0.197204	0.275561	0.0629667	0.0467623
E2F6	0.144504	0.0616676	0.0387603	0.00903039	0.0557885	0.0247895	0.0922371	0.0530822	0.06619	0.220128	0.129125	0.0672968
GREB1	0.0616026	0.02065	0.0297101	0.00419768	0.0626676	0.0562341	0	0	0	0.538668	0.0699868	0
LPIN1	0.342209	0.372781	0.115119	0.214202	4.31969	0.16053	0.0394421	0.0609703	0.101825	0.746862	0.573794	0.600857
TRIB2	0.0316636	0.223995	0.0343523	0.0510187	0.012341	0.0131912	0	0	0.0460186	0.177077	0.546484	0.127686
FAM84A	0.00474665	0.00833521	0.0241386	0.00982957	0.0112874	0	0	0	0.0370392	0.0461983	0	0
NBAS	0.157258	0.0952534	0.0764919	0.0480912	0.254729	0.114542	0.0314068	0.0427431	0.172355	0.171926	0.128209	0.199746
DDX1	0.364871	0.540151	0.214447	0.34651	0.222062	0.154566	0.359079	0.333925	0.432056	0.535068	0.283773	0.174129
FAM49A	0.98892	0.74311	0.919655	0.329688	0.526742	1.2683	0.609536	0.350672	0.868629	0.343928	0	0.803746
SMC6	0.20569	0.171674	0.231988	0.233992	1.00175	0.201477	0.248359	0.203636	0.209663	0.454932	0.167623	0.272502
GEN1	0.0270581	0.0177327	0.0157586	0.0595123	0.0509227	0.0282654	0	0	0.0573706	0.0363481	0	0
KCNS3	0.0114508	0	0	0.0101474	0	0	0	0	0	0.00850602	0	0.0350192
RDH14	0.140288	0.163793	0.0654546	0.179399	0.336381	0.176642	0.225667	0.371895	0.0391242	0.188897	0.200562	0.451302
LINC00954	0	0.0194957	0.0138054	0.00783285	0.0596828	0	0.0330954	0	0	0.014266	0.122146	0.0255989
TTC32	0.065659	0.0887336	0.158606	0.0804687	0.0837695	0.0983592	0	0.208116	0.175556	0.160684	0.146782	0.163411
RP11-79O8.1	0.00389455	0	0.014437	0.00376113	0.0128986	0	0	0	0	0	0	0
WDR35	0.0425689	0.0202046	0.0230114	0.0295155	0.00867867	0	0	0.0346717	0.0225715	0.0720391	0.0676599	0
LAPTM4A	3.38142	3.56799	2.35771	3.88468	3.22256	1.44783	1.63133	3.15002	1.97469	8.03583	1.29541	1.85209
SDC1	0.0212494	0.15897	0	0.0434987	0.00683681	0.0333222	0	0.135234	0	0.114438	0	0
PUM2	0.354577	0.343078	0.321259	0.305272	0.511558	0.320956	0.183942	0.253484	0.391652	0.562195	0.85841	0.638036
RHOB	5.03579	1.19662	2.33638	6.92778	0.315968	0.254228	4.74577	1.59637	6.85932	3.22301	0.947249	3.04098
HS1BP3	0.144066	0.0423341	0.0363583	0.128004	0.0164389	0.0321459	0.0719765	0.126162	0.0947723	0.0670484	0.0825246	0.060618
GDF7	0.00332486	0	0.0195911	0	0	0.0312004	0	0	0	0.178761	0	0
AC012065.7	0.00588116	0.00277059	0	0	0.00981422	0	0	0	0	0.044454	0	0
C2orf43	0.0477259	0.0791821	0.0253484	0.0625159	0.0828441	0.0300426	0	0.00746793	0.0297984	0.0567119	0.0526319	0
KLHL29	0.0072059	0	0	0	0.00720471	0.0104051	0	0	0	0.010574	0	0
ATAD2B	0.240904	0.285415	0.250196	0.104434	0.246267	0.508722	0.320805	0.0681632	0.214583	0.17335	0.506086	0.271459
UBXN2A	0.190715	0.162242	0.242432	0.179054	0.719179	0.370609	0.129363	0.0492843	0.0676795	0.27959	0.466998	0.0631604
MFSD2B	0.00502301	0.0271826	0	0.00279678	0.0101258	0.0174075	0	0	0	0	0	0
C2orf44	0.0147872	0.018109	0	0.0141234	0.0430274	0	0	0	0	0.0135142	0	0
FKBP1B	0.0714011	0.048114	0.0140508	0.0623742	0.00948749	0.518953	0.0952964	0	0	0.038052	0.0791221	0
SF3B14	1.13165	1.496	1.3616	1.78289	1.14457	1.05152	1.35709	1.68058	1.67755	1.6278	1.53705	1.30221
FAM228B	0.0689555	0.121875	0.102967	0.0456565	0.154256	0.0581303	0.023084	0.0114158	0.100058	0.0432545	0.0714725	0.0987031
TP53I3	0.195436	0.1158	0.117863	0.195311	0.0563943	0.0420263	0.333971	0.078712	0.0691136	0.287136	0.0773377	0.281152
ITSN2	0.95634	0.678975	0.653396	0.649867	0.816183	0.86427	0.447914	0.501915	1.13313	0.552605	1.28702	1.15462
NCOA1	0.226709	0.149343	0.3106	0.085866	0.521164	0.203006	0.0970039	0.101211	0.167497	0.57522	0.671748	0.378712
PTRHD1	0.66746	0.811414	0.728051	0.786982	1.38233	1.13415	1.1832	0.333483	0.74997	0.678689	0.417919	0.424364
CENPO	0.0219826	0	0.0094883	0.0228704	0.0467224	0.0497514	0.0422744	0	0	0.0303959	0	0.0275853
ADCY3	0.126194	0.088084	0.0058679	0.0397845	0.150296	0.117053	0.00511051	0.267555	0	0.170423	0	0.0940173
DNAJC27	0.0299293	0.0325854	0.0297768	0.0711465	0.102814	0.0714043	0	0.0583866	0.0657838	0.0799983	0	0.0697024
DNAJC27-AS1	0.0308544	0.0118538	0	0.00903039	0.0101258	0	0	0.0561245	0	0	0.261971	0
POMC	0.0551814	0.0522498	0.0190736	0.111187	0.193907	0.0668737	0.0270613	0.0644356	0.0763418	0.117013	0.149007	0
RP11-458N5.1	0	0.00712675	0.0166608	0	0.0387827	0	0	0.0510069	0	0.0168099	0.138409	0.0350192
DNMT3A	0.158009	0.144572	0.0852436	0.186554	0.147973	0.0654561	0.0601567	0.0225978	0.120722	0.161895	0.442118	0.0997413
DTNB	0.0997279	0.0300317	0.0187482	0.157961	0.0283712	0.0125836	0.0153315	0.105161	0.0431749	0.0518853	0.117319	0
AC104699.1	0	0.0412695	0	0	0	0	0	0	0	0	0	0
ASXL2	0.214737	0.169724	0.139332	0.150812	0.727502	0.20237	0.224094	0.0878551	0.192022	0.516675	0.631373	0.529818
KIF3C	0.0174372	0.0114811	0.0178955	0.0144129	0.0297249	0.0539544	0	0	0	0	0.0825246	0
AC013449.1	0	0.0151132	0.0162865	0.00927662	0.011753	0	0.0425512	0	0	0.0470308	0	0
RAB10	1.49573	1.11273	1.07496	1.54748	0.784895	1.49428	1.22908	1.24989	2.46912	0.980954	0.94395	1.1396
GAREML	0.00265809	0.0232404	0	0.0202437	0.0342603	0	0	0	0	0.0243787	0	0
HADHA	1.38383	1.15914	1.62147	1.38248	1.18472	1.28282	1.61853	0.628886	1.26844	1.24067	1.25331	1.28336
HADHB	0.855668	0.603861	0.611945	0.81787	0.489183	0.632645	0.992178	1.0447	0.522957	0.558557	0.75447	0.863821
GPR113	0.0085913	0	0	0	0.00980575	0	0	0	0	0	0	0
EPT1	0.0439335	0.0302971	0.0284641	0.066817	0.0278312	0.095723	0.0704421	0.0407913	0.0309847	0	0.1349	0.0801305
DRC1	0.00494481	0	0	0.0141299	0	0	0	0	0	0	0	0
C2orf70	0.00935352	0.0232104	0	0.0367967	0	0.0143245	0.0299383	0.0510069	0	0	0	0
SLC35F6	0.290862	0.0990171	0.140572	0.247259	0.0610954	0.147175	0.18312	0.476742	0.214989	0.3193	0.165049	0.141355
CENPA	0.010568	0.00425845	0.00459408	0.18593	0.0231572	0.0287087	0.010221	0	0	0.0172267	0	0
MAPRE3	0.0468798	0.100602	0.0346437	0.0626486	0.00953325	0.0638655	0.0281945	0.106494	0.0222489	0.22579	0.0705871	0
TMEM214	0.0947202	0.194001	0.0616406	0.0870849	0.278183	0.104516	0.0597637	0.0672558	0.0877028	0.217649	0.118159	0.0211942
AGBL5	0.0200561	0.0103546	0	0.0594924	0	0	0	0	0.0678521	0.070384	0.18861	0
OST4	4.21181	6.06589	4.88457	4.95614	7.88887	5.05952	4.93182	5.1373	4.79379	5.40138	6.69996	5.78146
EMILIN1	0.0739542	0.0718064	0.0921077	0.0529692	0.150211	0.0881951	0.00511051	0.0115071	0	1.00262	0.0998069	0.0137926
KHK	0.0331971	0.0291374	0.010262	0.0401066	0.00867867	0.0407115	0.0394421	0.027096	0	0.0231673	0.0473317	0.0470306
CGREF1	0	0	0	0	0	0.0300965	0	0	0	0	0	0
PREB	0.130003	0.201177	0.0843772	0.18843	0.188432	0.102924	0.163244	0.147876	0.112252	0.231097	0.172442	0.112859
SLC5A6	0.0786774	0.0422143	0.00664792	0.0238341	0.109872	0.0337491	0.0382059	0.0430707	0.036265	0.0905009	0.227822	0.060618
ATRAID	0.9678	0.96237	0.616142	1.10557	1.17763	0.738037	0.586795	1.53701	0.893632	1.07003	0.588947	0.962605
CAD	0.0473422	0.0612868	0	0	0.00857714	0	0.0422744	0.027096	0.0309847	0.0757374	0	0.0137926
UCN	0.0137931	0.00905297	0	0	0.0121051	0.0166611	0	0.104587	0	0.0135142	0	0.032317
MPV17	0.362129	0.252786	0.178212	0.340205	0.214606	0.211494	0.0879189	0.38231	0.114487	0.315779	0.298249	0.231637
GTF3C2	0.0688347	0.0538426	0.0959204	0.0778169	0.116808	0.109049	0.0316881	0.00575353	0.0940981	0.0296363	0.065229	0.151386
AC074117.10	0.00620133	0.0421935	0.0176285	0.0135712	0.0123501	0.0344104	0	0	0	0	0	0.0728231
EIF2B4	0.0817016	0.159147	0.070383	0.12198	0.222479	0.125385	0.182971	0.231468	0.0890507	0.153326	0.465528	0.102713
SNX17	0.625529	0.75283	0.590588	0.569158	0.795508	0.680034	0.884268	0.643084	1.15623	0.624953	0.758734	0.59925
ZNF513	0.0396192	0.0462757	0.103927	0.031337	0.0827037	0.0280949	0	0.00575353	0.0275382	0.0595909	0	0.0646822
PPM1G	0.712711	0.743117	0.527029	0.897344	1.31225	1.00029	0.42031	0.38491	0.706316	0.835194	0.843961	0.770757
NRBP1	0.480299	0.482933	0.397624	0.428002	0.309975	0.424083	0.273299	0.761176	0.498895	0.614701	0.927415	0.297579
KRTCAP3	0.0183682	0.0317149	0	0.0392418	0	0.0173532	0	0	0	0.0541624	0.0741037	0
IFT172	0.0175374	0.0100989	0	0.0408279	0.0239079	0	0	0.0652157	0	0.0162549	0	0
FNDC4	0.00221603	0.00751832	0.00758781	0	0.0250512	0	0	0	0	0.0653288	0	0
ZNF512	0.0714498	0.0262661	0.0196546	0.0776093	0.0373645	0.0155344	0.027994	0.0623882	0.0412923	0.0987887	0.076067	0.0844081
CCDC121	0.0622735	0.00409704	0	0.0616942	0	0.0145291	0	0	0.0490509	0	0.0705871	0
GPN1	0.0910145	0.201842	0.092926	0.334216	0.172812	0.168321	0.095744	0.0675108	0.116593	0.206515	0.214229	0.223856
SUPT7L	0.135827	0.125626	0.100757	0.182777	0.179661	0.128162	0.0817856	0.132351	0	0.136933	0.130547	0.272168
SLC4A1AP	0.183391	0.201582	0.185414	0.230244	0.216756	0.124334	0.146911	0.15691	0.245303	0.056049	0.599675	0.270137
MRPL33	1.16488	1.5362	1.67603	1.4695	0.945703	0.784079	2.73826	1.01008	1.48544	1.52504	0.973389	1.42453
RBKS	0.129237	0.0357533	0.0851466	0.0509673	0.0466495	0.00906874	0.0365193	0	0.145659	0.0440892	0.0526319	0.143788
BRE	0.273903	0.299102	0.257523	0.325017	0.152062	0.113836	0.270554	0.141026	0.280855	0.236609	0.440001	0.202971
FOSL2	1.22951	0.654532	1.70676	0.888659	1.49175	0.338993	1.20178	0.761611	0.745085	1.6049	1.33399	1.8502
RP11-373D23.3	0.0166108	0.0154834	0.0441529	0.0146088	0.0924748	0.0634393	0	0.109431	0.0495293	0.0552192	0.0825246	0.090778
PLB1	0.189359	0.109684	0.137679	0.0648204	0.0231265	0.0456353	0.0790593	0	0.177882	0.0772352	0	0.0744107
PPP1CB	2.40196	2.42584	3.63721	2.63937	1.55866	2.27065	1.48313	2.9366	2.14479	1.98216	2.69963	2.7128
SPDYA	0.0393189	0.0215394	0.108082	0.0101474	0.0779274	0.0785732	0.0464861	0.0238107	0.0274583	0.0872143	0	0.0904997
TRMT61B	0.0320638	0.0184653	0.0298795	0.0261302	0.0404647	0.0660219	0.077868	0.197097	0.151868	0.0891102	0.0707489	0.0137926
WDR43	0.310982	0.408103	0.275621	0.398494	0.336631	0.417558	0.143961	0.462357	0.354758	0.484513	0.396604	0.484459
FAM179A	0.0191536	0.0303162	0.0176285	0	0.04481	0	0.0306657	0.027096	0	0.0680073	0	0
CLIP4	0.120925	0.0539443	0.363553	0.0172493	0.13194	0.171948	0.18952	0.490399	0.492511	0.385816	0.195058	0.17224
ALK	0.00476174	0	0	0.0117073	0	0	0	0.0498718	0	0	0	0
YPEL5	0.920568	1.29675	1.26179	0.808321	5.23884	1.93333	1.18726	0.879764	1.22974	1.40124	2.36463	1.68596
LBH	0.0998127	0.109625	0.0633303	0.0994907	0.117841	0.0574151	0.0393939	0.0263888	0.0309847	0.736177	0.324504	0.484676
LCLAT1	0.0297397	0.0860521	0.0716121	0.0751502	0.026522	0.0452778	0.0346854	0.0837247	0.0537421	0.167486	0.0714725	0
CAPN13	0	0.010199	0	0.0686825	0.0244972	0	0.0419008	0.00575353	0	0	0	0.0978407
EHD3	0	0.00760621	0	0	0	0	0.0240624	0	0.0294586	0.0645716	0	0
XDH	0	0	0	0	0	0	0.0323389	0	0	0	0	0
RP11-1057B6.1	0.00769711	0	0	0	0.00958754	0.0146701	0	0.0278457	0	0.0494638	0	0
MEMO1	0.0773992	0.102821	0.0381338	0.0223987	0.0381877	0.108645	0.0731171	0.0852614	0.0779056	0.126165	0.170479	0
DPY30	0.559728	0.722365	0.627879	1.10831	0.444779	0.559765	0.587126	1.189	1.10037	0.830708	1.32404	0.959527
SPAST	0.18106	0.0976515	0.166215	0.0375796	0.0893361	0.0726827	0.195047	0.0443875	0.106595	0.248422	0.139658	0.0214317
RP11-563N4.1	0.00447383	0.00341346	0.00459408	0	0.0188191	0	0.0311061	0	0	0	0	0
SLC30A6	0.0762271	0.0608603	0.00979557	0.069143	0.0380162	0.027432	0.0750053	0.0510069	0.0869306	0.0243787	0	0.0465248
NLRC4	0.0255844	0.0160441	0.152006	0.0875516	0	0.0102012	0.225965	0	0.334593	0.0198715	0	0.111351
YIPF4	0.475877	0.513862	0.595234	0.560616	0.545812	0.356104	0.420392	0.520089	0.551526	0.867084	0.591489	0.754211
AL133245.2	0.00402722	0.00312854	0.0114921	0.00970666	0.0243985	0.00930805	0	0	0	0	0.0963753	0.0211942
BIRC6	0.624797	0.46253	0.548148	0.355597	0.753001	0.571098	0.490761	0.275658	0.485223	0.824126	0.907137	1.05415
TTC27	0.0220513	0.049355	0.0104192	0.0884302	0.0270588	0.0407944	0	0.0388268	0.0305968	0.027821	0.0806205	0.046295
LTBP1	0.0399061	0.0378723	0.0247795	0.00982957	0.0555652	0.0131937	0	0	0	0.626131	0.147325	0
RASGRP3	0.411605	0.371483	0.0808929	0.546873	0.00901965	0.339792	0.0270655	0.424017	0.0582651	0.128046	0	0.317405
FAM98A	0.0357325	0.101604	0.0529613	0.107844	0.0786723	0.020593	0.0314068	0.0688832	0	0.236325	0.0705871	0
AC073218.2	0.00494481	0	0	0.0191587	0	0	0.0419008	0	0	0.0161221	0	0
RP11-490M8.1	0.0113666	0.00658508	0	0.0128273	0.0100485	0.00559382	0	0.00856816	0.0272804	0.103293	0	0
CRIM1	0.03491	0.0431402	0.0735507	0.0234119	0.27599	0.0389245	0	0.0706053	0	0.180746	0.118624	0.231899
FEZ2	1.077	0.459828	0.439835	0.767266	1.35443	0.321506	0.512646	0.23562	0.494745	0.472968	0.330428	0.481007
AC007382.1	0.0037452	0.00243119	0	0.00777505	0	0	0	0	0	0	0	0.0214317
STRN	0.158048	0.102377	0.192109	0.131678	0.0349184	0.160161	0.16719	0.159125	0.267697	0.0737992	0.259215	0.0806916
HEATR5B	0.112201	0.112178	0.0488679	0.0647696	0.340371	0.0896579	0.0944	0	0.0893143	0.11576	0.0590797	0.117953
GPATCH11	0.183971	0.1405	0.0475332	0.166058	0.496766	0.0334671	0.142385	0.118177	0.0869016	0.0869781	0.0806205	0.147133
EIF2AK2	0.687554	0.385717	0.364272	0.787172	0.595656	0.181786	0.462665	0.338281	0.61768	0.744112	0.806451	0.437214
CEBPZ-AS1	0.223057	0.335018	0.201378	0.403167	0.335829	0.181967	0.249928	0.457511	0.211351	0.385116	0.544844	0.163758
CEBPZ	0.449298	0.309787	0.456527	0.480655	0.839625	0.344903	0.502405	0.489793	0.548904	0.81741	1.32465	0.451801
NDUFAF7	0.0463923	0.0990846	0.0549239	0.0497636	0.151671	0.092286	0.127814	0.0666725	0.0612234	0.138455	0.27835	0.0600876
PRKD3	0.197587	0.309666	0.112926	0.147829	0.348717	0.419256	0.27032	0.151532	0.0772233	0.537161	0.139159	0.362667
QPCT	0.0756892	0.475861	0.573435	0.0672031	0.0293929	0.508477	0.379288	0.251343	0	0.420149	0.1487	0.603158
CDC42EP3	0.187835	0.236024	0.168256	0.191691	0.0210273	0.219662	0.995448	0.390648	1.06915	0.231065	0.406441	0.454345
RMDN2	0.034215	0.0486808	0.0561796	0.0192685	0.0722667	0.00733504	0	0.127829	0.135452	0.0343617	0.084156	0
CYP1B1	0.0427157	0.0371938	0.512119	0	0.0558754	0.055255	0.450335	0.444756	0.146717	0.725756	0	0.124784
ATL2	0.0739551	0.0860807	0.121058	0.137153	0.196732	0.171781	0.0704552	0.110286	0.0830568	0.258114	0.117003	0.0488118
HNRNPLL	0.384417	0.500407	0.205041	0.423956	0.0999344	0.24902	0.280024	0.225394	0.102083	0.36998	0.498967	0.427943
GALM	0.58943	0.549125	0.0716189	1.04626	0.103883	0.126978	0.0586479	0.909839	0	0.0695157	0.393757	0.438152
SRSF7	2.77993	2.46801	1.33915	2.65222	7.8032	4.70385	1.68201	1.71074	1.91221	3.43048	3.11502	3.75788
GEMIN6	0.153931	0.119986	0.110873	0.16531	0.135163	0.0719956	0.201413	0.138417	0.312509	0.106137	0	0.139093
DHX57	0.0818166	0.0215782	0.048693	0.0269736	0.0576252	0.0610146	0.224362	0.0160361	0.0585229	0.110177	0.231532	0.280764
MORN2	0.198359	0.205997	0.17027	0.31333	0.101252	0.0616248	0.154436	0.347609	0.131501	0.385927	0.0707489	0.161146
ARHGEF33	0.00221603	0	0	0.00283812	0	0.0194284	0.00511051	0	0	0.010574	0.0608761	0
SOS1	0.189476	0.148578	0.171219	0.122495	0.198667	0.215415	0.224338	0.189617	0.417288	0.232122	0.51006	0.169007
MAP4K3	0.216127	0.066554	0.0932694	0.0420842	0.157579	0.111271	0.0240624	0.157236	0.0761428	0.100508	0	0.0470306
AC007246.3	0.0722512	0.0962976	0.0156635	0.0453373	0.0722688	0.0394026	0	0.142722	0.117619	0.0963606	0	0
THUMPD2	0.180824	0.069797	0.0444269	0.141045	0.37907	0.0677491	0.128772	0.0788451	0.0924144	0.191922	0.284541	0.0810964
SLC8A1-AS1	0.00316205	0.0107256	0	0	0.034104	0	0	0	0	0.0129963	0	0
SLC8A1	1.781	1.53227	1.03919	1.07538	0.0459611	0.565093	1.10506	0.217505	1.39877	0.68792	0.568118	1.32871
AC104654.2	0.00316205	0	0	0	0.0156128	0	0	0	0	0	0	0
PKDCC	0.0176015	0.0187994	0	0.0253537	0.0424431	0.00946569	0	0	0	0.262996	0.0526319	0
AC083949.1	0.0109956	0.00914783	0.00983731	0	0	0	0	0	0	0	0	0
EML4	0.969068	0.589453	0.586168	0.39855	0.504395	0.454585	0.762007	0.477273	0.839698	1.02054	4.51613	1.42876
COX7A2L	1.19225	1.59201	1.75288	1.34359	2.22762	2.21665	1.84483	2.06011	1.52346	1.79975	1.48004	0.915476
MTA3	0.0423482	0.0737988	0.0298564	0.0775959	0.0433139	0.0586132	0.0893412	0.12342	0.0300149	0.0464965	0	0.100544
OXER1	0.00368313	0.0113376	0.0258308	0	0	0	0	0.027096	0	0	0	0
HAAO	0.126904	0.0994732	0.0920858	0.16554	0.0443983	0.0262274	0.0492252	0.318036	0.164007	0.045705	0	0.0621673
THADA	0.103578	0.125322	0.0896282	0.109127	0.283009	0.0528783	0.111363	0.0631645	0.0688305	0.0771762	0.0608761	0.068194
ZFP36L2	7.98202	4.74858	5.21198	3.60916	13.9078	2.33395	5.40238	4.04426	3.80284	7.17288	20.7471	12.7055
AC010883.5	0.0107396	0.00952321	0.0785822	0.00754374	0.0159612	0	0	0	0	0.0318147	0.0963753	0.107135
PLEKHH2	0.0406193	0	0.0170716	0	0.0438221	0.0451785	0	0	0.0234471	0.494173	0	0
DYNC2LI1	0.0735185	0.0921571	0.0290601	0.0922679	0.0515945	0.0990327	0.0311061	0.125392	0.0978046	0.154642	0	0
LRPPRC	0.391581	0.372933	0.231089	0.252664	0.268922	0.259696	0.202958	0.123811	0.313801	0.35753	0.503676	0.235896
PPM1B	0.622678	0.426975	0.711705	0.394739	0.510032	0.299389	0.515072	0.362733	0.604446	0.827958	1.59123	0.759281
PREPL	0.131102	0.181176	0.0481548	0.195648	0.228258	0.0703902	0.100061	0.152793	0.0234471	0.223114	0.397517	0.126133
CAMKMT	0.0376644	0.0502231	0.0689805	0.0538864	0.060647	0.032874	0.0742723	0.0980827	0.0939374	0.038776	0	0.0253306
SRBD1	0.208758	0.182127	0.108014	0.198849	0.164641	0.0877452	0.128557	0.0769102	0.361791	0.108441	0.0608761	0.305302
PRKCE	0.0481417	0.0312562	0.0479691	0.0264586	0.0950545	0.0102012	0.156502	0.15645	0.089119	0.0923149	0.0526319	0
EPAS1	0.186492	0.121108	0.18393	0.0636555	0.0492014	0.094114	0	0.359268	0.139027	0.578655	1.35506	0.207753
ATP6V1E2	0.0387795	0.0391385	0.0747904	0.0390147	0.0653731	0.0111916	0.00511051	0.0560811	0.0617557	0.0624862	0.0666014	0.0255989
RHOQ	1.38589	0.468711	1.11947	0.47263	0.391857	0.270179	0.596372	0.586241	0.990382	0.907281	0.380854	0.700198
PIGF	0.207017	0.200464	0.190523	0.246437	0.21947	0.102989	0.175443	0.219134	0.311721	0.236196	0.141198	0.204405
CRIPT	0.325673	0.379708	0.364489	0.466935	0.310853	0.24655	0.383446	0.683564	0.192769	0.411982	0.549719	0.57792
SOCS5	0.0740474	0.0768551	0.0451827	0.0215769	0.34838	0.0737913	0.0306657	0.0567963	0.0321825	0.381908	0	0
RP11-333I13.1	0.00665036	0	0.0140508	0	0	0	0	0	0	0	0	0
MCFD2	0.283163	0.323168	0.22383	0.364708	0.370373	0.248748	0.20183	0.284862	0.108436	0.318971	0.137188	0.175042
TTC7A	0.163889	0.128633	0.469669	0.0927556	0.326258	0.0742303	0.268295	0.0309773	0.030295	0.15077	0.349996	0.268612
AC073283.7	0.00252451	0.00531813	0	0	0.00937884	0.0106666	0.0425512	0	0	0	0	0
CALM2	6.22627	7.57655	8.6418	9.71721	6.47575	5.20763	10.8628	9.74432	11.9135	6.67383	5.56707	7.2089
AC073283.4	0	0.00346682	0	0	0	0	0.0352995	0	0	0.0141978	0	0
BCYRN1	0.00459141	0.0043746	0.0228266	0	0.0500154	0	0	0.0388268	0	0	0	0
EPCAM	0.0908226	0.291473	0.0675338	0.392217	0.0404265	0.284303	0.237318	0.48705	0.146743	0.166362	0.273981	0.117012
MSH2	0.0544195	0.172019	0.0643022	0.065156	0.0641555	0.0448463	0.0413271	0.0401454	0.118116	0.048328	0.415876	0.0736948
MSH6	0.110206	0.147367	0.0501872	0.165102	0.0437637	0.114629	0.0290025	0.02944	0.110816	0.170701	0.249544	0.0137926
FBXO11	0.324974	0.199873	0.330198	0.242861	0.351104	0.236716	0.332116	0.110486	0.335897	0.330276	0.362503	0.542736
AC079807.2	0.00744716	0.0214395	0	0	0.0150917	0.0102012	0	0	0	0	0	0
FOXN2	0.246738	0.308071	0.349567	0.191231	0.287622	0.604562	0.803751	0.143165	0.539836	0.186835	0.118081	0.420828
RP11-191L17.1	0.0176226	0.0305635	0.025465	0.0246695	0	0.0164487	0	0.00746793	0.0978333	0.0150259	0	0
PPP1R21	0.22861	0.249108	0.146509	0.0875059	0.17566	0.113844	0.165166	0.178513	0.27791	0.117713	0.134605	0.0887593
STON1	0	0.0273995	0.00476735	0.00250079	0.00954627	0	0	0.00856816	0	0.0309936	0.195687	0
NRXN1	0.00430627	0	0	0.00619023	0	0	0	0	0	0.102247	0	0
GPR75-ASB3	0.0462564	0.0380251	0.0829857	0.0647136	0.0323635	0.0393958	0.0402013	0.021972	0	0.106004	0	0
CHAC2	0.0138498	0.048173	0.0219077	0.0948075	0.032688	0	0.0571077	0.0650335	0	0	0	0
ERLEC1	0.418563	0.875493	0.330098	0.438975	0.740734	0.226979	0.279281	0.89351	0.303269	1.04137	0.505616	0.273999
PSME4	0.437981	0.120536	0.29329	0.354599	0.278028	0.228762	0.424936	0.138584	0.255174	0.637743	0.39888	0.306292
ACYP2	0.294732	0.201629	0.115945	0.297484	0.432348	0.112911	0.118265	0.285404	0.305381	0.14814	0.52131	0.442044
C2orf73	0	0	0	0.0235189	0.00857714	0	0	0	0	0	0	0
SPTBN1	0.139319	0.153164	0.179249	0.10799	0.110135	0.0516638	0.20256	0.517319	0.0783255	0.257273	0.594096	0.0137926
RTN4	2.96702	2.3871	2.77509	2.52142	2.18222	3.65934	2.53388	3.45057	2.91293	4.38427	4.48609	1.76513
CLHC1	0.0166933	0.0107256	0.0198955	0.0165784	0	0	0.0338293	0	0	0.0188184	0.219948	0
RPS27A	25.2588	33.8856	33.8289	23.8487	43.9824	35.3518	41.6356	16.8034	31.5383	32.7111	42.886	34.2675
MTIF2	0.270248	0.120627	0.169714	0.248862	0.153953	0.142494	0.173147	0.205168	0.250109	0.363328	0.277153	0.158753
CCDC88A	1.46455	0.802793	0.895092	0.918455	1.65553	1.22838	0.758214	0.514567	0.581939	0.847876	0.700358	0.953519
CCDC104	0.187623	0.347242	0.0788348	0.197736	0.30362	0.133973	0.0402013	0.179354	0.0710815	0.396393	0.600709	0.0490169
SMEK2	0.545613	0.355571	0.410035	0.336204	0.616183	0.509409	0.513055	0.359766	0.33992	0.592023	1.40621	0.310389
RP11-554J4.1	0.0229943	0	0.0794875	0.0327343	0.0309419	0.0289767	0.0314688	0	0	0.0179094	0	0.026943
PNPT1	0.199066	0.181288	0.117031	0.211536	0.213716	0.128787	0.168576	0.0506536	0.233631	0.164072	0.255411	0.118244
EFEMP1	0.0156869	0.012429	0.00299373	0.0135582	0.0313514	0	0	0.0281158	0	0.0864288	0	0
VRK2	0.305045	0.258716	0.331645	0.256475	0.176502	0.218544	0.116066	0.152633	0.341745	0.144145	0.21713	0.140441
FANCL	0.0685328	0.0745337	0.0366736	0.0913283	0.0509942	0.0608941	0	0.0354693	0.0225715	0.202104	0.165049	0.0728231
LINC01122	0	0	0.00821726	0	0.101369	0	0	0	0	0.0172267	0	0
AC007381.2	0	0	0	0	0.0959078	0	0	0	0	0	0	0
BCL11A	0.0296925	0.160236	0	0.0309657	3.67107	0.271701	0.103014	0.356837	0.0225715	0.325464	0.211446	0.153591
PAPOLG	0.949107	0.24743	0.180374	0.231703	0.126237	0.222312	0.129929	0.118278	0.216858	0.484936	0.0676599	0.456706
REL	5.95612	3.02876	3.00826	2.47787	3.66435	4.54114	1.33718	1.01125	1.87185	2.91015	3.88514	5.00358
PUS10	0.0704856	0.0488442	0.0184594	0.0215293	0.0981191	0.106171	0	0	0.147207	0	0	0
PEX13	0.178098	0.209831	0.0708641	0.276977	0.105349	0.14509	0.0314068	0.152508	0.158478	0.211809	0.192525	0.219168
KIAA1841	0.0951863	0.0489425	0.0406746	0.0716701	0.03187	0.0289351	0.0723522	0.0648316	0.0613671	0.0682822	0	0
C2orf74	0.0089022	0.00978036	0	0.00579613	0	0	0.0444261	0.027096	0	0	0	0
AHSA2	0.251043	0.105573	0.209254	0.114266	0.361065	0.209805	0.255749	0.109634	0.0866452	0.416843	0.0526319	0.249323
USP34	0.439784	0.398228	0.572629	0.21942	0.568325	0.744431	0.48809	0.235437	0.62537	0.646903	1.20963	0.741931
RP11-355B11.2	0.00397253	0.0123835	0.00779035	0	0	0	0	0.027096	0.0222489	0	0.0745962	0
XPO1	0.605587	0.591438	0.340434	0.651351	0.61109	0.497908	0.448846	0.14692	0.498437	0.765365	0.661571	0.62268
FAM161A	0.0151258	0.0395506	0	0.0361985	0.0270747	0	0.0311061	0	0	0.138161	0.176457	0
CCT4	0.889524	1.11298	0.687946	1.43933	0.859421	0.764084	0.94943	1.0619	0.983345	0.961618	1.1823	0.962883
COMMD1	0.367674	0.379195	0.419663	0.466391	0.436085	0.40721	0.328259	0.301037	0.212665	0.348147	0.531674	0.491743
[truncated: 14,348 more rows]

## Sheet: Tumor.Myeloid.AverageExpression
	0	1	2	3	4	5	6	7	8	9	10	11	12	13
RP11-34P13.7	0.00234164	0.00382002	0	0.00267041	0	0	0	0.00208728	0	0	0	0	0	0
AL627309.1	0.0245932	0.00537652	0.0256225	0.00624769	0.00561076	0.0305689	0.066743	0.0209134	0.0247179	0.0135557	0.0108378	0.0224685	0.0987128	0
AP006222.2	0.201218	0.208811	0.31749	0.177647	0.324085	0.284018	0.234197	0.518724	0.354101	0.181778	0.0761622	0.0643279	0.271819	0
RP4-669L17.10	0.00300968	0.0105264	0.000404868	0.00368131	0.00411605	0.00895513	0	0.00104746	0	0.00626614	0	0.0214701	0	0
RP5-857K21.4	0	0.000602039	0	0	0	0	0	0.00421065	0	0	0	0	0	0.0542597
RP11-206L10.3	0.0114788	0.0131667	0.0204368	0.00773624	0.0108002	0.0290793	0.0489113	0.013313	0.00379487	0.0319996	0	0.0126079	0	0.0477102
RP11-206L10.2	0.0108865	0.0139857	0.0245577	0.017222	0.0224859	0	0.0407105	0.0186507	0.0147563	0.00323837	0	0.0195316	0	0
RP11-206L10.9	0.0168188	0.0252947	0.0111889	0.01526	0.0284147	0.0211102	0.0131036	0.0026374	0.00817299	0.0181514	0	0.0165968	0	0
FAM87B	0.00295222	0.00601255	0.00187284	0.00282732	0.0105253	0	0.00226957	0.00295573	0.00773505	0	0	0	0	0
LINC00115	0.0577873	0.0593201	0.0359743	0.0552478	0.0446379	0.044497	0.0441246	0.0551325	0.0608962	0.0506378	0.0124124	0	0	0.125406
FAM41C	0.02314	0.0364591	0.0478643	0.0436264	0.0439901	0.0460637	0.0247414	0.0403132	0.0618547	0.0452486	0	0.126262	0	0
RP11-54O7.1	0.000575284	0	0	0	0	0.00302593	0	0	0	0	0	0.0160537	0	0.0477102
RP11-54O7.3	0	0	0	0	0	0.0053554	0.00211692	0	0	0.00503806	0	0	0	0
SAMD11	0.00589224	0.00349977	0.00430706	0.00615323	0.0110143	0.0300528	0.00716485	0.0115342	0	0.00591193	0	0.00811528	0	0.0845059
NOC2L	0.278091	0.277248	0.295987	0.24719	0.273592	0.301299	0.267758	0.197343	0.24814	0.254744	0.103554	0.265652	0.283633	0.164231
KLHL17	0.018826	0.0115747	0.0104781	0.00661283	0.0166231	0.00349762	0.00949547	0.0170596	0.00446275	0.0043792	0.0437468	0.0622419	0	0
PLEKHN1	0.0185598	0.00126285	0.0149211	0.0066544	0	0.00377138	0.00507591	0.0277149	0	0.0279542	0	0.0214701	0	0
RP11-54O7.17	0.00165032	0.00638474	0.000519225	0.00239728	0.0359962	0	0.00457748	0	0	0	0.0224434	0	0	0
HES4	0.159052	0.120369	0.112117	0.118357	0.488929	0.166568	0.0822582	0.0923432	0.210672	0.142676	0.72854	0.242224	0.494011	0.173497
ISG15	2.47088	2.71506	3.808	1.03667	1.72712	3.56603	2.19002	2.34777	1.00797	2.31865	4.82952	3.42742	1.92923	1.19739
AGRN	0.108997	0.0678068	0.096458	0.0558258	0.0361892	0.146379	0.0458556	0.08254	0.0284228	0.0602216	0.0472871	0.025827	0.0968542	0
RNF223	0	0.00111791	0	0	0	0.011075	0.0017168	0	0	0	0.0244154	0	0	0
C1orf159	0.0225972	0.033669	0.0419028	0.0238181	0.0231365	0.0444928	0.0369199	0.0427529	0.0145427	0.0417202	0	0.0241866	0	0
RP11-465B22.8	0.0125595	0.00654812	0	0.00835595	0	0.0349422	0	0	0	0.0108111	0	0	0	0
TTLL10	0.00798914	0.00997446	0.0044662	0.0170612	0.00950796	0.00182759	0.00302934	0.00461827	0.0210022	0.00769657	0.0659784	0	0	0
TNFRSF18	0.0711127	0.0727745	0.0817275	0.0642364	0.0325631	0.0302481	0.0855782	0.12958	0.0243194	0.839015	0.150873	0.24735	1.16591	0
TNFRSF4	0.0707927	0.0383186	0.15433	0.0559813	0.081237	0.0231783	0.0378098	0.135272	0.0166012	0.268531	0.0862285	0.458332	1.49641	0.430798
SDF4	0.83104	0.902151	0.967295	0.744103	0.538617	0.760291	0.9873	0.670279	0.687762	0.875332	0.524969	0.446759	0.533752	0.517392
B3GALT6	0.191944	0.154556	0.128823	0.149502	0.109837	0.110286	0.166353	0.125502	0.0356176	0.135584	0.0481007	0.0505706	0	0.137661
FAM132A	0.00103376	0.00461269	0.0143714	0.00976455	0.00336909	0.0058061	0	0	0	0.00506056	0	0	0	0
RP5-902P8.12	0	0.000961621	0	0	0.00261042	0	0	0	0.00636233	0	0	0	0	0
UBE2J2	0.3339	0.38072	0.278661	0.351554	0.313009	0.269953	0.333759	0.284062	0.348172	0.337495	0.102545	0.315882	0	0.205793
SCNN1D	0.0083605	0.00226517	0.000498946	0.00673116	0.00863039	0.0014536	0	0.00158454	0.00709264	0.00543504	0	0	0	0
ACAP3	0.0441904	0.124517	0.0587822	0.0434634	0.0549378	0.0509746	0.0436858	0.0164404	0.0367805	0.0564886	0.12218	0	0	0.102883
PUSL1	0.0708325	0.137371	0.0804412	0.0882097	0.0899752	0.0799732	0.116833	0.0668287	0.078181	0.103763	0	0.106518	0.181443	0
CPSF3L	0.252767	0.346775	0.264244	0.207008	0.207561	0.251456	0.265658	0.19601	0.20048	0.32429	0.226124	0.116204	0.249059	0.337135
GLTPD1	0.0799943	0.0874449	0.110088	0.085197	0.0354165	0.0885877	0.0920489	0.0710771	0.088846	0.0974253	0	0.0434018	0	0.0930613
DVL1	0.0395635	0.0430073	0.0502103	0.0254489	0.00237899	0.0338156	0.0193754	0.049057	0.0273741	0.0186521	0	0	0	0
MXRA8	0	0.00207966	0.023981	0	0	0.0104448	0.00782105	0.0318915	0	0.0122185	0.0399997	0.0328589	0	0
AURKAIP1	1.44612	2.15614	1.56307	1.47632	1.09232	1.76815	1.8319	1.30193	1.78901	1.49678	1.1871	1.12629	1.13695	1.93359
CCNL2	0.210805	0.213802	0.219439	0.209083	0.264059	0.214789	0.264902	0.321139	0.292943	0.291447	0.14577	0.292252	0.106285	0.379139
RP4-758J18.2	0.0615387	0.0646022	0.0728791	0.0674155	0.0396352	0.0690663	0.0457295	0.0479104	0.0481859	0.0870914	0.0440685	0	0.14208	0
MRPL20	1.40573	1.66772	1.45082	1.4569	0.971015	1.48577	1.60715	1.07976	1.42177	1.42152	1.38072	0.90356	1.10636	1.17546
RP4-758J18.13	0.00302443	0.000800221	0.00388713	0	0	0	0	0.00142696	0.0111536	0	0	0	0	0
ANKRD65	0.0291313	0.0431835	0.0436446	0.0560626	0.0217516	0.0193728	0.0193302	0.0436637	0.024018	0.00250412	0.0511929	0.0443168	0.0535699	0.0845059
VWA1	0.0251438	0.0423421	0.0192866	0.0304604	0.0159444	0.0440218	0.0285291	0.0435593	0.0131232	0.0163458	0.0083636	0.0390062	0	0
ATAD3C	0.00752275	0.0118902	0.026784	0.0179062	0.0224267	0.0373732	0.0180808	0.00532274	0.00959458	0.0321234	0	0	0	0
ATAD3B	0.0749424	0.116175	0.0709782	0.0818187	0.0566693	0.102174	0.0464535	0.0603142	0.0824642	0.0510159	0.0372542	0.0330769	0.12948	0
ATAD3A	0.104122	0.196294	0.0940973	0.0972632	0.103818	0.125517	0.151381	0.0675774	0.0484291	0.121144	0.017972	0.119173	0	0
SSU72	1.24627	1.2318	1.11525	1.35667	1.15162	1.02164	1.41385	1.02195	2.36966	1.23611	1.49266	0.882996	1.04334	0.829842
AL645728.1	0.017265	0.0187347	0.0132386	0.0192203	0.0113491	0.00613313	0.0187106	0.0183182	0.0153258	0.0286819	0	0	0	0
C1orf233	0.0202238	0.0525246	0.039369	0.0218338	0.0164176	0.0255139	0.0347105	0.0206564	0.0244644	0.0341222	0.017972	0	0	0
RP11-345P4.9	0.0488686	0.0175509	0.0234077	0.0204487	0.0572625	0.0278386	0.019769	0.0193126	0.0633998	0.0228976	0.0445423	0.0940336	0.0740609	0
MIB2	0.0832016	0.0814946	0.0770634	0.0669638	0.0988179	0.0737627	0.0630925	0.153336	0.12715	0.228925	0.120549	0.0926959	0	0.649006
MMP23B	0.00227507	0.00336925	0.0113423	0.00226663	0.00944524	0.0253863	0.00577476	0.0222154	0.00432405	0.0212588	0.0139658	0	0	0.120697
CDK11B	0.171872	0.345613	0.172351	0.159015	0.164717	0.210529	0.136453	0.173658	0.130469	0.213507	0.369923	0.105407	0.342363	0.343241
RP11-345P4.10	0.00599138	0.00785061	0.00570588	0.00158777	0.00380602	0.00519266	0.00619138	0.00608643	0.0227191	0	0.0329776	0	0	0
SLC35E2B	0.0830713	0.0715442	0.121868	0.064756	0.0793391	0.15457	0.0717546	0.101989	0.0829158	0.144787	0.0236609	0.0964009	0	0.482936
RP11-345P4.7	0.000916936	0	0.0054956	0	0	0	0	0	0	0	0	0	0	0
CDK11A	0.256574	0.38718	0.250502	0.270169	0.202222	0.290824	0.222374	0.187691	0.101232	0.315486	0.400465	0.381031	0.157695	0.394134
SLC35E2	0.00223716	0.00647344	0.00985628	0.00625453	0	0.0118148	0.00303949	0.00612457	0.00695642	0	0	0.0143781	0	0
NADK	0.365704	0.289969	0.494322	0.296738	0.202857	0.402268	0.318845	0.387649	0.299627	0.334889	0.438618	0.12734	0	1.17371
GNB1	0.910048	1.22576	0.999355	0.990598	0.600447	0.879214	0.949363	0.947991	0.606342	0.93445	0.594121	0.601452	0.268518	1.0716
RP1-140A9.1	0.00261308	0.000714024	0.00108757	0	0	0	0	0.0045885	0	0	0	0	0	0
TMEM52	0.00190132	0.00116242	0.00177181	0	0.00392094	0	0.00349288	0.00539364	0.00834454	0	0	0	0	0
C1orf222	0.00872523	0.00187824	0.00206552	0.0127094	0.00629141	0	0.00384953	0	0.00602305	0.00482486	0	0	0	0
GABRD	0	0	0.00319964	0	0.0031072	0	0	0.00652982	0	0	0	0	0	0
PRKCZ	0.0325191	0.0214159	0.0278917	0.0304155	0.0237934	0.0501851	0.0223633	0.0189348	0.0171791	0.0507307	0.0128912	0.0291818	0	0
RP5-892K4.1	0.00241815	0	0.00715929	0.00133414	0	0.0014536	0.0036778	0.00341542	0.00358169	0.00592957	0	0	0	0
C1orf86	1.04377	0.945735	0.889724	0.970007	0.571109	0.93973	0.929291	0.755161	0.729235	1.0234	0.598299	0.458047	0.51621	0.761847
AL590822.2	0.00304352	0.00098537	0.00116832	0	0	0.00393137	0.00477051	0	0	0.0105622	0	0	0	0
AL590822.1	0.00291493	0.00709815	0.00760722	0.00952873	0.00527635	0	0.00364812	0.0118573	0	0.00552837	0	0	0	0
SKI	0.183976	0.193058	0.176951	0.0897569	0.116037	0.123425	0.128597	0.0796544	0.0634221	0.200989	0.133031	0.0284479	0.206457	0.0954203
MORN1	0.0130947	0.00555569	0.0105529	0.0195179	0.0438303	0.0215775	0.00980984	0.0125488	0.0240303	0.00118875	0.0849166	0.0166414	0	0.0817875
RER1	1.26811	1.62411	1.17072	1.12153	0.915024	1.34592	1.4676	0.869305	1.04424	1.13775	0.849319	0.694321	0.547694	0.736233
PEX10	0.108289	0.126007	0.115961	0.0619649	0.078169	0.101283	0.120506	0.0666844	0.123023	0.0809369	0.0239263	0.0400412	0.173106	0
PLCH2	0	0.00444019	0.00139323	0.00174961	0.00509611	0	0.00359549	0	0	0.0160098	0	0	0	0
PANK4	0.0258901	0.0436139	0.0550608	0.0680375	0.0493816	0.0529406	0.0385218	0.0289547	0.0496689	0.0557648	0.116963	0.0244643	0.143728	0.0408938
HES5	0	0	0.00883685	0	0.00822063	0	0	0	0.00547736	0.00173101	0.0083636	0	0	0
RP3-395M20.12	0.0602585	0.040807	0.0400166	0.0824565	0.126059	0.0446831	0.0704524	0.189166	0.174246	0.0824138	0.0985129	0.105819	0	0.0542597
TNFRSF14	0.657796	0.483006	0.930019	0.415841	0.484301	0.766597	0.824552	1.16664	1.16865	0.669711	0.521662	0.516057	0.567799	0.752295
RP3-395M20.9	0	0.00156493	0.00320666	0.00259866	0.0072307	0.000979433	0	0.0132776	0.0251292	0	0	0.0184627	0	0
FAM213B	0.115324	0.0735343	0.127888	0.0557952	0.0616078	0.116785	0.0579381	0.347954	0.751271	0.0578191	0.0386758	0	0	0
MMEL1	0.0405928	0.0192808	0.00551635	0.00805351	0.00202167	0.106791	0.012292	0.010838	0.104431	0.0203631	0	0.085079	0.234885	0.125406
TTC34	0.000999149	0.00644514	0.0111991	0.00221011	0.00156505	0.00243086	0.00211481	0.00901911	0	0.010575	0	0	0	0
LINC00982	0	0.00160017	0	0	0	0.01335	0	0	0	0	0	0	0	0
PRDM16	0	0.00239805	0	0	0	0.000914342	0	0.00124895	0	0	0	0	0	0
ARHGEF16	0.0146841	0.0161016	0.00244689	0.00473551	0.00780113	0.0143789	0.00382334	0.00707367	0.00153587	0	0.0083636	0	0.0365145	0
MEGF6	0.00920407	0.0148034	0.0547563	0.0118406	0.0126473	0.00528947	0.00502179	0.0417585	0.00827802	0.0303226	0	0.0125192	0	0
RP11-46F15.2	0	0	0.00356742	0	0	0	0.0027636	0.00674818	0	0.00430142	0	0	0	0
TPRG1L	0.0522619	0.048437	0.0873286	0.0321338	0.0258239	0.0388501	0.0551264	0.113809	0.0439947	0.048274	0.0311156	0.0328058	0.182347	0.138422
WRAP73	0.104831	0.140649	0.131131	0.104983	0.12968	0.119339	0.0817778	0.0926256	0.0962298	0.126943	0.0546948	0.0683677	0	0.14609
TP73	0.0139379	0.0139476	0.00590508	0.00847345	0.00948317	0.00305458	0	0.0161782	0.00364983	0.0204695	0	0	0	0
TP73-AS1	0.0358328	0.0262763	0.0299624	0.0254867	0.0112902	0.0370536	0.0133556	0.034443	0.035153	0.0368485	0.0274243	0	0	0
SMIM1	0.0947487	0.0208519	0.0455515	0.0336859	0.0335977	0.0390997	0.0646747	0.0542261	0.0134294	0.0234465	0	0.0634125	0.178804	0
LRRC47	0.139811	0.141776	0.163768	0.168057	0.0766622	0.115529	0.125103	0.100488	0.066964	0.127084	0.0083636	0.0305751	0	0.202853
CEP104	0.108167	0.11405	0.107698	0.143072	0.0485548	0.116718	0.152194	0.103784	0.0351659	0.173586	0.0619249	0.0690915	0	0
DFFB	0.0218573	0.0244638	0.0374038	0.0206343	0.0057909	0.0199571	0.00740262	0.00632254	0.0109851	0.0110452	0	0.0303833	0	0
C1orf174	0.159316	0.24275	0.170081	0.177828	0.19153	0.1708	0.153808	0.131938	0.150811	0.129835	0.064694	0.104072	0.177447	0
LINC01134	0.00194919	0.00329183	0.00262183	0.00146209	0.00434965	0	0	0.00479004	0	0	0	0	0	0
NPHP4	0.0149452	0.0216162	0.0372351	0.0129023	0.0200734	0.00661179	0.00773514	0.0179709	0.00432405	0.0242062	0.017972	0.0184627	0	0
KCNAB2	0.308214	0.406377	0.474194	0.279067	0.180089	0.318543	0.360213	0.403325	0.393472	0.356007	0.33265	0.115584	0	0.307569
RPL22	10.5699	10.6038	10.5916	13.6697	9.19404	11.2752	10.744	13.3042	9.025	9.94218	11.2171	14.3795	12.7238	16.4291
RNF207	0.0285672	0.00905869	0.010176	0.0463994	0	0.018265	0.0189701	0.0095091	0.00605517	0.0322614	0.0416158	0.0285281	0	0
ICMT	0.141391	0.340585	0.177116	0.151779	0.0660007	0.143946	0.198064	0.0917889	0.130853	0.146111	0.0499748	0.0616136	0.108648	0.0542597
LINC00337	0.000974288	0.00549725	0.000759296	0.00093002	0	0.00678237	0.00243767	0	0	0.00590094	0	0.0320941	0	0
GPR153	0.00141341	0.00405658	0.00268642	0	0.00592826	0	0.00134261	0.00186414	0.0208957	0	0	0.025827	0.0987128	0.0482074
ACOT7	0.0992273	0.499049	0.110344	0.174172	0.13927	0.158035	0.121339	0.0789429	0.327202	0.17028	0.0132906	0.254322	1.13173	0.651913
RP1-202O8.3	0.00526784	0.0114357	0.00455669	0.00204026	0.00262299	0.00342906	0.00522223	0.00343365	0.00888179	0.00801178	0	0	0	0
HES2	0.0176113	0.0122774	0.00423495	0.00890401	0.00201858	0.041029	0	0.0130328	0.413002	0.029618	0.0240743	0	0	0.0816187
ESPN	0.0590495	0.0625179	0.0141597	0.0437544	0.0265418	0.179169	0.0144871	0.0400535	0.0169204	0.0376294	0.0293412	0.110888	0.0749131	0
TNFRSF25	0.0173747	0.0114318	0.0375795	0.0222746	0.0077732	0.0265737	0.0174068	0.0192475	0.0214108	0.19924	0.0496283	0.0617123	0	0
PLEKHG5	0.0045939	0.00509252	0.00347818	0.0139974	0	0.0146267	0	0	0.00602305	0.00185257	0.0494805	0.0438494	0.0820856	0
NOL9	0.0448182	0.0798796	0.0761486	0.0434899	0.0150088	0.082701	0.0495057	0.0509938	0.0561222	0.0692214	0.0507141	0.0101188	0	0.129115
ZBTB48	0.101732	0.0974076	0.104885	0.11185	0.0960056	0.0819466	0.0901002	0.0701509	0.0701359	0.0766505	0.0949362	0.125384	0.423678	0.0788793
KLHL21	0.0205848	0.0223899	0.0527116	0.0145599	0.0523285	0.0328136	0.017059	0.232237	0.0382881	0.0501686	0.0446561	0.0407835	0.0820856	0.167819
PHF13	0.0267703	0.0270355	0.0357316	0.0210104	0.0394499	0.0439439	0.0239483	0.105091	0.0404019	0.0378868	0.0108378	0.0729867	0.0978091	0
THAP3	0.0918537	0.0905656	0.100487	0.0593317	0.0816364	0.068573	0.0885137	0.13904	0.101694	0.0770538	0.0765046	0.0369254	0.0968542	0.22758
DNAJC11	0.0699716	0.0806089	0.0952389	0.0292634	0.0371936	0.0429161	0.0710584	0.0411163	0.0289193	0.0615551	0.10735	0.0345016	0.0365145	0.0729868
RP11-312B8.1	0	0.000788461	0.0017341	0.00363874	0	0	0	0	0.0166469	0.00666379	0	0	0	0
CAMTA1	1.13305	1.46021	0.889363	1.12442	1.11516	1.16497	1.01133	0.890194	1.2001	0.957915	1.09434	1.12899	0.812354	1.2428
RP11-338N10.3	0	0	0.00396427	0	0	0	0.00186747	0	0	0	0	0	0	0
VAMP3	0.872421	0.770866	0.838871	0.570052	0.781161	0.670694	1.10931	0.674394	0.461028	0.573209	0.356846	0.145344	0.246852	0.305789
PER3	0.0884355	0.0633799	0.131042	0.0437044	0.0589544	0.0677208	0.10019	0.142806	0.123996	0.074144	0.115757	0	0.0740609	0
UTS2	0.435212	0.314665	0.393267	0.631364	0.262678	0.220472	0.0475002	0.337841	0.188498	0.48592	0.120152	0.054048	0.689098	0
TNFRSF9	0.10242	0.116127	0.0506543	0.236342	0.0384	0.0940206	0.0488891	0.109333	0.0560181	0.179051	0	0.171714	1.49209	0.0788793
PARK7	2.6844	3.68374	2.63833	3.18323	2.73663	3.09979	2.73331	2.39505	2.81046	2.95391	1.77296	2.65254	2.97796	6.85073
ERRFI1	0.129648	0.0383455	0.0922987	0.0522594	0.208807	0.0899259	0.274571	0.178223	0.200941	0.147121	0.243221	0.0850657	0.0978091	0
RP11-431K24.1	0.00352862	0.00464145	0.00264183	0.000992676	0	0.00123944	0.00484723	0	0	0.00400831	0	0.0117785	0	0.102374
SLC45A1	0.00106337	0.00343031	0.00483335	0	0.00308996	0.00923731	0.0100444	0.00567123	0	0.0109539	0	0	0	0
RERE	0.198268	0.172717	0.130756	0.189858	0.120288	0.213014	0.22344	0.0880831	0.127678	0.207939	0.0856513	0.257715	0.135227	0.0859254
RP5-1115A15.1	0	0.000832297	0.000762157	0	0	0	0	0.00718231	0	0.00320765	0	0	0	0
ENO1	9.51152	11.1306	9.22066	10.601	4.75243	8.60826	8.51346	16.2829	2.93512	7.60439	4.09859	5.91443	5.67879	1.93132
ENO1-AS1	0.0120891	0.0192928	0.00633065	0.0147717	0.020222	0.0156743	0.0172799	0.0252806	0.00364983	0.0230936	0	0	0	0
CA6	0	0.00221974	0	0	0	0.00873513	0	0.00430362	0	0.0105863	0	0	0	0
SLC2A5	0.331021	0.246731	0.637307	0.0390261	0.200231	0.297415	0.490125	1.65455	0.271985	0.303251	0	0.0484089	0	0
GPR157	0.0326037	0.0196692	0.0325363	0.10733	0.04929	0.00882412	0.0130575	0.10437	0.111871	0.0357007	0	1.38391	0.111259	0
RP3-510D11.1	0	0.000628207	0.00427509	0	0.00314186	0	0.00239057	0.00270762	0	0.00685717	0	0	0	0
RP3-510D11.2	0.00460723	0.00349203	0.0219424	0.00413489	0.0065513	0.00421626	0.00667945	0.0162524	0.0586254	0	0.0463263	0	0	0
H6PD	0.06835	0.0545013	0.0918731	0.0338674	0.0317549	0.105489	0.0712392	0.0526733	0.0895537	0.0865279	0.118997	0.23898	0	0
SPSB1	0.0390395	0.0273881	0.0207079	0.0296475	0.056482	0.0423001	0.0396749	0.232651	0.719155	0.0782982	0.0265175	0.056356	0.295474	0.143777
SLC25A33	0.148751	0.225496	0.0972437	0.244384	0.537504	0.14993	0.226137	0.165494	0.311305	0.210906	0.426884	0.43786	0.134324	0.0817875
TMEM201	0.00612514	0.0152834	0.0177971	0.0169363	0.013009	0.0349145	0.0114593	0.0132114	0.00765441	0.0234379	0	0.0320941	0	0
PIK3CD	0.153222	0.215496	0.120662	0.149596	0.103582	0.130554	0.109543	0.10796	0.0669519	0.268348	0.0591344	0.0501863	0.072704	0.31251
C1orf200	0.00942274	0.00319394	0.00275254	0.00363481	0.00326847	0.00309647	0.00657372	0	0	0.00309983	0	0.0197299	0	0
RP11-558F24.4	0.00434436	0.00154523	0.0069613	0.00115797	0.00118175	0.00768716	0.00121748	0.0109158	0.00396834	0.00651026	0	0	0.0885395	0.0517352
CLSTN1	0.210161	0.261533	0.238732	0.177133	0.106696	0.250051	0.234847	0.149199	0.107217	0.218671	0.0890764	0.264607	0.105565	0.0477102
CTNNBIP1	0.336316	0.490403	0.304694	0.473619	0.307625	0.387899	0.301379	0.247206	0.2312	0.341776	0.277928	0.457271	0.0365145	0.290511
LZIC	0.30618	0.433044	0.336137	0.350587	0.228096	0.326096	0.377606	0.49831	0.210389	0.29224	0.521105	0.170795	0.269576	0.355759
NMNAT1	0.0421435	0.0508294	0.0857303	0.0478778	0.017331	0.0870529	0.075949	0.0581025	0.0565612	0.034752	0.0491794	0	0	0.102374
RBP7	0.0116693	0.0104693	0.0614403	0.00827396	0.0321982	0.0351318	0.0717888	0.0503031	0.0163172	0.0918166	0.986802	0	0	0
UBE4B	0.0886086	0.0919438	0.115697	0.0725944	0.0930546	0.118452	0.0981739	0.0677512	0.131609	0.116053	0.0670226	0.0281974	0.0365145	0.0810708
KIF1B	0.192961	0.100089	0.18378	0.0508831	0.317944	0.117549	0.252842	0.224441	0.322156	0.208024	0.16971	0.0427061	0	0.0517352
PGD	0.511434	0.618879	0.558155	0.563441	0.437544	0.460596	0.629628	0.638408	1.01286	0.450714	1.19977	0.233954	0.380933	0.499426
APITD1	0.0410014	0.258585	0.0301924	0.0630033	0.0355651	0.0441855	0.0475603	0.0369477	0.0273522	0.0460177	0.0290262	0	0	0
APITD1-CORT	0.00146115	0.000685288	0.000824766	0	0	0	0	0	0	0	0	0	0	0
DFFA	0.212167	0.214993	0.230056	0.15311	0.159476	0.231846	0.21377	0.144872	0.140242	0.237773	0.0645818	0.114919	0	0.0814047
PEX14	0.0801192	0.0723221	0.151422	0.0704137	0.0449013	0.0996285	0.0741786	0.122222	0.114905	0.06587	0	0.0747848	0	0
CASZ1	0.0312929	0.011845	0.00695213	0.00250915	0.0106062	0.0345969	0.0107219	0.0038395	0.0142172	0.0112849	0.0108378	0	0.0820856	0
C1orf127	0.00954691	0.0119647	0.0082384	0.00253058	0.0078591	0.0098335	0.00577844	0	0.0330581	0.00740952	0	0	0	0
TARDBP	0.435277	0.643897	0.443872	0.495866	0.236197	0.466549	0.500972	0.297414	0.385317	0.497886	0.458217	0.371474	0.217715	0.328346
RP4-635E18.8	0.0184716	0.0092064	0.0158314	0.0116018	0.0123526	0.0274716	0.0108324	0.0102092	0.0401296	0.0127824	0	0	0	0.0408938
SRM	0.610623	0.913018	0.531307	0.769576	0.484119	0.603797	0.768909	0.3072	0.684794	0.64762	0.55236	0.394695	0.0832667	0.70876
EXOSC10	0.115542	0.193152	0.16213	0.142575	0.100867	0.104268	0.13329	0.145958	0.135988	0.159092	0.0744127	0.141637	0.155971	0
RP4-635E18.7	0	0	0.00275738	0.00267376	0	0	0.00202644	0.00300015	0	0	0	0	0	0
RP4-635E18.6	0.00836281	0.0149138	0.00837429	0.0101023	0.00532342	0.0133373	0.00486165	0.00628782	0.00179759	0	0	0	0	0
MTOR	0.0484015	0.0628656	0.0453351	0.040353	0.0289939	0.094492	0.0585658	0.02353	0.0430958	0.0489267	0	0.0125192	0	0.31451
UBIAD1	0.0609456	0.11002	0.0726365	0.0734956	0.0469226	0.0582836	0.0799019	0.0485046	0.109055	0.0936785	0.109913	0.040079	0.0832667	0.0517352
FBXO2	0.00197899	0.00853012	0.0211677	0.012682	0.00171992	0	0.00430354	0.0204281	0.00854708	0.144467	0.0132906	0	0	0.0482074
FBXO44	0.0601665	0.0622917	0.0689308	0.0882012	0.0264229	0.0482834	0.0611923	0.0576411	0.0241415	0.133478	0.0414295	0	0	0.127642
FBXO6	0.177975	0.206349	0.274307	0.289729	0.143843	0.27355	0.237723	0.139672	0.137339	0.260143	0.24341	0.287556	0.0820856	0.276835
MAD2L2	0.31153	0.661919	0.330513	0.408303	0.364695	0.219077	0.513347	0.307586	0.519418	0.542702	0.489399	0.243948	0.148974	0.653505
DRAXIN	0.0126413	0.00334203	0.0103402	0.00945803	0.00357018	0.00930097	0.00149259	0.0165415	0	0.0796861	0	0.0134868	0	0.102374
AGTRAP	0.618748	0.478398	0.671118	0.314265	0.233206	0.473621	0.750532	0.763939	0.753661	0.67207	0.929336	0.0295995	0.0749131	0.127087
C1orf167	0.00494277	0.00141894	0	0	0.00443195	0	0.00786373	0.00379087	0	0	0	0	0	0
MTHFR	0.142713	0.169452	0.157938	0.18997	0.252086	0.134853	0.133901	0.0920218	0.118869	0.163331	0.325294	0.135097	0	0.109791
CLCN6	0.0510393	0.064272	0.0961477	0.0674651	0.088425	0.0375927	0.0548905	0.0444379	0.0783752	0.0268997	0.0942596	0.0183377	0	0
NPPA-AS1	0.00584186	0.00712911	0.00724629	0.00189716	0	0.0305497	0.0192484	0.00481693	0	0	0	0	0	0
NPPB	0	0	0.00251413	0	0	0	0	0.0103556	0	0	0	0	0	0
KIAA2013	0.287645	0.280334	0.292175	0.210851	0.112958	0.23572	0.229966	0.314754	0.243193	0.300424	0.076515	0.158879	0	0.142447
PLOD1	0.341227	0.365915	0.400771	0.192102	0.16004	0.288622	0.305822	0.383599	0.0686185	0.274723	0.07124	0.049103	0.0365145	0.209912
MFN2	0.0988027	0.12317	0.143701	0.0640093	0.0901349	0.115596	0.0694608	0.0607178	0.0704367	0.0736568	0.0988904	0.069507	0.145163	0.198036
MIIP	0.19028	0.335211	0.28505	0.22704	0.173175	0.202819	0.310366	0.161485	0.256589	0.225375	0.200352	0.188176	0.442427	0.594063
TNFRSF8	0.0203354	0.00582115	0.00935364	0.0216817	0.0212445	0.0172822	0.0321116	0.0153782	0.0106852	0.0223807	0.0477336	0.0369965	0.222519	0
TNFRSF1B	1.11667	0.682867	0.780967	0.956229	1.68325	0.608008	1.18829	0.77298	0.828633	1.42439	2.51553	0.464983	0.201344	0.632107
VPS13D	0.0984677	0.115089	0.1197	0.0965644	0.0866755	0.109551	0.115338	0.132936	0.0685812	0.127346	0.0608472	0.0160537	0.232267	0.0859254
RP5-888M10.2	0.000917528	0	0.000858952	0	0.00873111	0	0	0	0	0	0	0	0	0
DHRS3	0.961767	0.708843	0.716463	0.575018	0.579021	0.72316	0.653667	0.797878	0.549731	0.570054	0.152172	0.249835	0.10714	0.171783
RP11-474O21.5	0.00634887	0.00280981	0.00844592	0.00201853	0.00542084	0.00346799	0.0032733	0.00259431	0	0.00374189	0	0	0	0.090712
C1orf158	0.0218375	0.00589021	0.00112227	0.00760904	0.00395418	0	0.00277696	0	0.0205447	0	0	0	0	0
PDPN	0.155255	0.0645967	0.236884	0	0.0373596	0.240924	0.404575	0.337407	0.01299	0.128407	0	0	0	0
PRDM2	0.163385	0.176511	0.194757	0.178314	0.128223	0.25934	0.242736	0.259379	0.261432	0.308784	0.413708	0.337309	0.20872	0.274964
KAZN	0.0114777	0.0115693	0.000824766	0.0123045	0.0171379	0.00712903	0.0113718	0	0.0147909	0.00801499	0	0	0.164171	0
TMEM51	0.667444	0.518363	0.737283	0.584049	0.479182	0.552046	0.466747	1.10927	0.231423	0.407107	0.0679243	0.0234522	0.0365145	0
FHAD1	0.0743257	0.0466203	0.0573578	0.0456228	0.0622233	0.103582	0.0801171	0.111729	0.0331481	0.0576008	0.0555302	0.0316608	0	0
RP3-467K16.2	0.00547827	0.00468118	0.00645767	0.00438398	0.00355448	0	0.0033956	0.00205477	0	0.00549055	0	0.0369965	0	0
RP3-467K16.7	0	0	0.00173401	0	0.00527857	0.00347242	0	0.00674818	0	0	0	0	0	0
RP3-467K16.4	0.00147642	0.00189575	0.0012221	0.00177587	0	0	0.00240465	0	0.00578505	0	0	0	0	0
EFHD2	1.84587	2.08033	1.51392	2.47343	1.18589	1.6723	2.24086	0.858826	0.706129	1.63433	1.30245	1.74251	2.16847	0.658551
CASP9	0.0641326	0.0791632	0.0657645	0.090789	0.0896715	0.0810475	0.0814071	0.0567441	0.0818781	0.0425771	0.0964026	0.125674	0	0.131606
DNAJC16	0.120464	0.0491907	0.0695742	0.0486912	0.0397377	0.13795	0.0848112	0.0615982	0.0549614	0.0843041	0.0343411	0.0134868	0.0365145	0.0891012
AGMAT	0.015512	0.00917173	0.0255613	0.00345403	0.011318	0.0202084	0.00709199	0.00261455	0.00521753	0.0559281	0	0	0	0
RP4-680D5.2	0.00441852	0.00236056	0	0	0	0	0.00282533	0	0	0	0	0	0	0
DDI2	0.102316	0.0861641	0.167345	0.132852	0.101081	0.165748	0.100655	0.170448	0.186482	0.0888716	0.0984937	0.0896054	0.0365145	0.174132
PLEKHM2	0.125431	0.149472	0.280849	0.101494	0.0929716	0.221165	0.147118	0.379866	0.165405	0.139356	0.0165428	0.00841057	0	0
SLC25A34	0	0.00211673	0.0122732	0.00341534	0.0116808	0.0036672	0.00964915	0.00184014	0.00578505	0	0.0103185	0	0	0
FBLIM1	0.0391386	0.0174555	0.0470376	0.0259791	0.0166447	0.0651382	0.036903	0.0449447	0	0.0406131	0.0392471	0	0.0885395	0
RP11-169K16.9	0.10767	0.0784864	0.124496	0.0760316	0.131269	0.0975299	0.142235	0.155533	0.128221	0.120993	0	0.0204203	0.0749131	0.152296
SPEN	0.264169	0.33007	0.286194	0.310759	0.205136	0.305596	0.25145	0.287503	0.195898	0.327534	0.259736	0.286876	0.234599	0.386713
ZBTB17	0.0884413	0.0998113	0.100676	0.0689573	0.0563689	0.0700725	0.0787791	0.221848	0.0949519	0.0642936	0.0546209	0.0377939	0.242795	0
C1orf64	0	0	0.0091624	0	0.00714113	0.00680379	0.00167963	0.0162413	0.0176939	0	0.0334544	0	0	0
HSPB7	0.00112277	0.000590505	0.0106164	0	0.00413712	0	0.00422093	0.0216586	0	0	0	0	0	0
CLCNKA	0	0	0.00686	0	0.0016807	0	0	0.0103586	0	0	0	0	0	0
EPHA2	0.0492146	0.02323	0.0272459	0.0220773	0.0384794	0.0213984	0.0233878	0.0120666	0.022366	0.0410329	0	0.0224737	0	0.35942
RP11-276H7.2	0	0.00531287	0.00227451	0.00773855	0.00269781	0	0	0	0	0	0	0	0	0
RP11-276H7.3	0	0.00134652	0.000378597	0	0	0	0	0.00420877	0	0	0	0	0	0
ARHGEF19	0.0169073	0.0213112	0.0137524	0.027752	0.00431363	0.0493118	0.018248	0.00126245	0	0.0241027	0.0484294	0	0	0
C1orf134	0.000789256	0.00236469	0	0	0	0	0.000904437	0	0.00214284	0	0	0	0	0
RSG1	0.00860315	0.00761925	0.0186263	0.00676305	0.00738962	0.0084218	0.0149793	0.00783974	0.00587565	0.00545672	0	0	0	0
FBXO42	0.118379	0.119826	0.135466	0.105799	0.0783582	0.164105	0.103703	0.156532	0.0800444	0.0977316	0.0516932	0.0468246	0.0749131	0.0477102
SZRD1	0.349853	0.450403	0.415214	0.332819	0.209693	0.31028	0.37501	0.406718	0.373249	0.370832	0.2024	0.372899	0.514353	0.378241
SPATA21	0	0	0.00144403	0	0.00547111	0	0	0	0	0	0	0	0	0
NECAP2	0.65083	0.602849	1.07655	0.575198	0.544794	0.75142	0.96248	0.833617	0.64676	0.836823	0.451433	0.565288	0.316857	0.547536
RP4-798A10.2	0.00283705	0.00995819	0.00299777	0.000760225	0.0106392	0.0308838	0.00312451	0.0127632	0.00526131	0	0	0.0163111	0	0
RP4-798A10.7	0.00510756	0.00486367	0.00886074	0.00364333	0.00339648	0.00990538	0.00383809	0.0145209	0.0144183	0.00366936	0	0	0	0.102374
NBPF1	0.071103	0.0586414	0.203081	0.0639646	0.0647048	0.205502	0.0893667	0.114407	0.176204	0.105282	0.0083636	0.183985	0	0
CROCCP2	0.0550409	0.058828	0.0750869	0.0724847	0.0822749	0.0856924	0.0887178	0.0859729	0.0638224	0.144445	0.0540664	0.0788365	0	0.102858
CROCC	0.0340451	0.02572	0.0474905	0.0344021	0.0312841	0.0370782	0.0157567	0.0593394	0.0115068	0.0658321	0.0862936	0.0200822	0.105405	0
RP11-108M9.4	0.353417	0.358196	0.2008	0.272745	0.343381	0.356274	0.146732	0.251838	0.414024	0.237686	0.411783	0.128689	0.153037	0.125406
RP11-108M9.6	0.0092122	0.020165	0.0136993	0.0044959	0.0190018	0.0322186	0.00563149	0	0.0100238	0.0306489	0	0	0	0
MFAP2	0.00518584	0.00523274	0.0389076	0.00749618	0.0026522	0.058933	0.0467147	0.0297996	0.0120413	0.0118083	0	0.013753	0	0.0816187
ATP13A2	0.0591849	0.0946141	0.188226	0.0418778	0.0426133	0.155814	0.102974	0.101773	0.0547381	0.0853664	0.0538721	0	0	0.482629
SDHB	0.758873	0.870802	0.869078	0.794729	0.838746	0.891317	0.875018	0.805953	1.2912	0.773447	0.58315	0.398684	0.800303	0.903497
PADI2	0.173684	0.0983722	0.0503561	0.173505	0.254492	0.080111	0.0541578	0.0326101	0.0967903	0.12934	0	0.223425	0	0
PADI1	0.00288641	0	0	0.00181712	0	0.00287594	0	0	0.00379761	0	0	0	0	0
PADI4	0.00448603	0.000712889	0	0	0	0	0	0	0	0.0367374	0.19921	0.0359651	0.243329	0.159435
RCC2	0.329073	0.589027	0.351556	0.324857	0.256161	0.354906	0.231782	0.131738	0.124068	0.292873	0.108091	0.21365	0.0968542	0.223586
ARHGEF10L	0.112143	0.0608847	0.224383	0.0277934	0.150992	0.176493	0.0831249	0.0946281	0.0620902	0.143682	0.0497773	0	0	0
IGSF21	0.161176	0.103355	0.356268	0.00944829	0.364368	0.0794272	0.376409	0.0992481	0.00359517	0.18394	0	0	0	0
KLHDC7A	0.00124155	0.00362289	0	0	0.0108972	0.00880876	0	0	0	0	0	0	0	0
PAX7	0	0	0	0	0	0.0375435	0	0	0	0	0	0	0	0
ALDH4A1	0.0163896	0.0281605	0.0329016	0.0135797	0.00834118	0.0185121	0.0239485	0.0221212	0.0325793	0.00191615	0	0.0103015	0.1626	0
IFFO2	0.0214437	0.0148055	0.0222766	0.0189802	0.0186417	0.00621617	0.0171816	0.0273493	0.0287685	0.0205657	0	0.0462141	0.243521	0
UBR4	0.137415	0.176808	0.344606	0.105192	0.161977	0.243707	0.240414	0.410065	0.199788	0.187125	0.192803	0.112483	0	0.384282
RP1-43E13.2	0.0226965	0.0156935	0.00874597	0.025439	0.0115447	0.0101464	0.0117987	0.00572669	0.00858767	0.011738	0	0.0558709	0	0.0816187
EMC1	0.0833371	0.109806	0.11811	0.084794	0.0808893	0.161182	0.088759	0.123275	0.0398853	0.103099	0.0363226	0.0984147	0.111259	0
MRTO4	0.144359	0.283419	0.218994	0.179081	0.128377	0.256752	0.261608	0.213712	0.294846	0.144176	0.087134	0.136402	0.0365145	0.136047
AKR7A3	0.00140983	0.00149416	0.000501549	0	0	0.0187079	0	0.00831878	0	0	0	0.0195316	0	0
AKR7A2	0.507858	0.692479	0.41442	0.487573	0.385482	0.248697	0.476145	0.324807	0.568129	0.390738	0.26639	0.432767	0.290136	0.992322
PQLC2	0.1121	0.0987634	0.145213	0.107033	0.0273061	0.133262	0.157695	0.117104	0.106436	0.0873162	0.037633	0.165153	0	0.0810708
CAPZB	4.55489	4.00599	5.50827	4.38922	4.262	3.96573	5.41078	3.40546	1.68652	4.37453	3.03647	3.38385	3.01558	1.67853
MINOS1-NBL1	0.00924471	0.00446349	0.00845038	0.00407518	0.00188839	0.0203922	0.0196461	0.003477	0	0.00932492	0.0233774	0	0	0
MINOS1	3.00615	3.64913	2.78792	2.72432	3.00049	2.79449	2.78055	1.8278	1.88218	2.41331	2.38747	1.68558	1.63832	1.08254
NBL1	0.0695713	0.0763672	0.190773	0.0275734	0.0518765	0.051258	0.248529	0.1756	0.0501765	0.2843	0.0977476	0.0696235	0.265344	0
TMCO4	0.0644266	0.0667536	0.0866938	0.0466957	0.0531609	0.0815782	0.0521431	0.0688919	0.0611913	0.0696339	0.0478864	0.0808427	0	0
RNF186	0.0026922	0.0025788	0	0	0.00700756	0.00382082	0	0.00626409	0.00489079	0.00254924	0	0	0	0
OTUD3	0.0081386	0.037505	0.0310981	0.0233369	0.0131708	0.0259813	0.0335572	0.0287122	0.0171152	0.0277235	0.0356414	0.0101188	0.0987128	0
PLA2G2D	0	0.000837777	0.0645501	0.00347082	0.00122592	0.0620567	0.00744252	0.00399914	0.470766	0.0109143	0	0	0	0
RP3-340N1.2	0.00556609	0.0172705	0.00826887	0	0.0132923	0	0.0242875	0.0519245	0	0.0116244	0	0	0	0
PLA2G2C	0.00101749	0.00064861	0	0	0	0	0.00558379	0.00205824	0.00989561	0.00185257	0	0	0	0
UBXN10-AS1	0.0119166	0.00734253	0.00742941	0.00306792	0.00251079	0.0594344	0.00487934	0.0217184	0.00394524	0.0206954	0	0	0	0
UBXN10	0.0169217	0.00569158	0.00499708	0.0146571	0.0150526	0.0247575	0.0197904	0	0.0277359	0.00167123	0.0165428	0.0244861	0	0
CAMK2N1	0.0274661	0.0168123	0.00524102	0.0138755	0.0186654	0.0299787	0.0209858	0	0.0190328	0.0291913	0.049001	0.0241866	0	0
MUL1	0.11802	0.107393	0.11213	0.0718102	0.0624642	0.110327	0.0864929	0.0715572	0.091985	0.0762955	0.0124124	0.0323616	0	0
CDA	0.00612749	0.00347979	0.0157918	0.00625938	0.00857542	0.00765645	0.0125865	0.0136613	0.486262	0.0442973	0.985011	0	0	0
PINK1	0.139039	0.0649204	0.195335	0.0609175	0.0810326	0.137823	0.130137	0.141523	0.346494	0.16284	0.0184015	0.0764909	0	0.107699
PINK1-AS	0.0028818	0.00654557	0.00631727	0.00964122	0.0151252	0.0110209	0.00934686	0	0.00488457	0.0183812	0	0	0.108648	0
DDOST	0.959335	1.06603	0.815526	1.00956	0.923654	1.08419	0.937408	0.602566	0.541297	0.912622	0.409145	0.799641	0.329869	1.12912
KIF17	0.0909381	0.0959786	0.0148212	0.100681	0.039654	0.0225475	0.0161431	0.00974682	0.095248	0.0238184	0	0	0	0.123168
HP1BP3	0.792998	1.54517	0.803399	0.732103	0.642826	0.692886	0.743127	0.751922	0.529444	0.987949	0.926412	0.750676	0.908814	0.945608
RP5-930J4.4	0.00171292	0.000943365	0	0	0.00477326	0	0	0	0	0.0117621	0.0469814	0	0	0
EIF4G3	0.18093	0.22343	0.231905	0.244637	0.138955	0.218161	0.223258	0.164717	0.153045	0.21435	0.0685645	0.304358	0.196044	0.358471
ECE1	0.0471506	0.0276173	0.0294689	0.0352396	0.019922	0.0823398	0.0337445	0.0206665	0.0609221	0.105183	0.0961997	0.197882	0	0
NBPF3	0.00545385	0.00491997	0.022374	0.00151482	0.00315611	0.00789177	0	0.0111785	0.0223013	0	0	0	0	0
ALPL	0.0161371	0.00834257	0.00570433	0.00362392	0.0176903	0.0126489	0.010605	0.00598894	0	0.0161667	0	0	0	0
RAP1GAP	0.00632655	0.00308654	0.0109134	0.00705325	0	0.032667	0	0.01717	0.00214284	0.00864552	0	0.0224737	0	0
USP48	0.219974	0.379748	0.279942	0.280345	0.164475	0.235645	0.22006	0.197975	0.242373	0.220267	0.202239	0.199981	0.37586	0.399453
LDLRAD2	0	0	0	0.00902283	0	0.00179678	0.00313525	0.00211251	0	0	0	0.0221635	0.0740609	0
HSPG2	0.0244392	0.0334468	0.0905118	0.057562	0.0458291	0.121149	0.041901	0.109316	0.013469	0.0217442	0	0.0555571	0.204118	0.166048
RP1-224A6.3	0.00262864	0.000539579	0.00744915	0.00149414	0	0	0.00364341	0.00370686	0.00703092	0	0	0	0	0
LINC00339	0.0134282	0.0411081	0.0907982	0.0130472	0.0140499	0.0884688	0.0190182	0.0383318	0.0224246	0.0285841	0.0643797	0.0119669	0	0.13815
CDC42	5.11749	4.93932	3.31251	5.7476	6.22004	3.75342	5.09365	2.69772	4.86534	5.19337	6.78688	3.95743	5.50957	2.32059
RP1-224A6.9	0.00313826	0.00632975	0.000868131	0	0	0	0.0101203	0	0	0.00164626	0.0133424	0	0	0
WNT4	0	0.000647606	0	0	0	0	0.0029308	0	0	0	0	0	0	0
ZBTB40	0.0258577	0.0307804	0.0330677	0.0181085	0.0287636	0.0460606	0.0263258	0.0689392	0.0113101	0.0784984	0.0128912	0.0306027	0	0.102374
C1QA	31.5681	20.8745	36.8975	18.0057	28.502	27.0065	38.7207	7.01141	1.41293	17.8457	1.6417	0.446161	0.706202	0.197462
C1QC	29.5475	21.7526	34.9692	16.3663	33.005	27.7446	33.0216	6.46946	1.38818	17.9483	0.518716	0.234809	0.591459	0.410489
C1QB	31.7493	25.3713	38.3672	17.4187	36.188	34.599	50.1791	4.93745	1.46838	20.4485	1.39677	0.632827	0.371839	0.411946
EPHB2	0.105045	0.0393651	0.12088	0.00892382	0.0451219	0.0628061	0.0691836	0.0295875	0	0.07	0	0	0.0535699	0
KDM1A	0.118702	0.184044	0.110345	0.122504	0.0653155	0.131903	0.21658	0.0860887	0.0813342	0.138206	0.105205	0.31533	0.367571	0.563912
LUZP1	0.317715	0.314935	0.281686	0.154687	0.159458	0.276273	0.329679	0.186847	0.179526	0.320357	0.0755702	0.123567	0.0365145	0.198012
RP5-1057J7.6	0.00707359	0.016069	0.0170203	0	0.0110307	0.0352036	0.00474303	0.00547223	0.00489022	0.0374546	0	0	0	0
HNRNPR	0.8196	1.46241	0.69898	0.914436	0.83544	0.930189	1.00982	0.49221	0.796653	1.00231	0.646042	0.732327	0.794751	0.482158
ZNF436	0.0127993	0.0196599	0.0364072	0.00288321	0.0130707	0.00491032	0.0127605	0.0194577	0.0139402	0.0151899	0	0	0	0
C1orf213	0.0113602	0.00770551	0.00453456	0.00909855	0.0236287	0.0185353	0.0024361	0.0158595	0.02416	0.021251	0.0128912	0	0	0
TCEA3	0.00538493	0.019262	0.0124616	0.0120455	0.0067714	0.0963026	0.00279504	0.0117304	0	0.019292	0.0363153	0.105163	0	0
ASAP3	0.0007245	0.00164504	0.000990435	0	0.00527857	0.00848547	0	0	0	0	0	0	0	0
E2F2	0.00839014	0.0771944	0.00169733	0.00222827	0.012786	0.0123252	0.00486089	0.00415045	0.00385016	0.00969459	0	0	0	0
RP1-150O5.3	0	0	0	0	0	0.00929502	0	0	0	0.00229298	0	0	0	0
ID3	0.602448	0.721644	1.08629	0.373129	1.13269	0.637563	0.705455	0.707692	1.25769	0.931176	0.570303	0.612658	0.275581	0.647149
RPL11	27.2024	23.7307	21.7218	33.6965	27.1184	26.9484	25.7972	26.5758	32.006	26.3556	36.4083	33.39	44.2344	40.9894
TCEB3	0.163186	0.229349	0.20909	0.176983	0.0844267	0.204869	0.227929	0.161581	0.165285	0.201769	0.049618	0.147497	0.105565	0.165911
RP5-886K2.3	0.0190145	0.0221243	0.0272907	0.0256503	0.0340181	0.0444114	0.0125922	0.0357231	0.0581759	0.0188837	0.0108378	0.0325925	0	0.199806
PITHD1	0.258113	0.519402	0.469143	0.277638	0.211706	0.402352	0.304597	0.368076	0.384613	0.363704	0.223748	0.237334	0.194827	0.351832
LYPLA2	0.255338	0.235965	0.354313	0.214344	0.159926	0.284172	0.316807	0.186625	0.231494	0.312353	0.251355	0.210288	0.105565	0
GALE	0.200291	0.195967	0.252404	0.164325	0.153684	0.291456	0.161067	0.158734	0.15181	0.244622	0.109077	0.0939339	0.213114	0
HMGCL	0.258738	0.267471	0.305108	0.174765	0.149855	0.378665	0.253699	0.297456	0.278179	0.231653	0.0871953	0.261174	0.0365145	0.154109
FUCA1	0.334906	0.20559	1.00621	0.210003	0.269506	0.629104	0.516034	0.231052	1.00968	0.412899	0.308485	1.33198	0.0365145	0.199298
CNR2	0	0.00172205	0.00701245	0	0	0.00374451	0	0	0	0.00493243	0	0.030845	0	0
PNRC2	0.0809115	0.108931	0.0617438	0.0560912	0.0123734	0.0163001	0.06511	0.0599039	0.00667121	0.0622128	0	0.020469	0	0.0482074
SRSF10	0.242538	0.440596	0.172904	0.257251	0.190078	0.173622	0.235245	0.195301	0.152336	0.210869	0.120346	0.171398	0.133369	0.0408938
IFNLR1	0.110602	0.061847	0.0192365	0.0414799	0.094288	0.0117234	0.0444845	0.0358126	0.060098	0.0293485	0	0.0303833	0.0987128	0.0729868
GRHL3	0	0.00484104	0	0.00175395	0	0.00304057	0.00156257	0	0	0	0	0	0	0
STPG1	0.0454096	0.0462252	0.017381	0.0254361	0.0151938	0.0370083	0.0369781	0.0428844	0.0100918	0.00356624	0.0167044	0	0	0
NIPAL3	0.0741335	0.110473	0.0755457	0.0967939	0.0395965	0.104282	0.0697997	0.0357386	0.0223862	0.247	0.0952883	0.0326506	0	0.254855
RCAN3	0.162587	0.166081	0.130534	0.217363	0.129935	0.136401	0.131951	0.134183	0.166168	0.309368	0.0631461	0.130245	0.137016	0.402421
RP4-594I10.3	0.0250398	0.0166043	0.021314	0.0244592	0.0336451	0.0339413	0.0231333	0.0231791	0.0573789	0.0519414	0.0293412	0	0	0.0482074
NCMAP	0.00150636	0.000743218	0	0.00251375	0.0067965	0.0102571	0	0.00235967	0.00214284	0	0	0	0	0
SRRM1	1.6911	2.26237	1.31062	2.10114	1.76936	1.78574	1.6551	1.31511	1.57358	1.8602	1.46292	1.63317	2.76317	1.00407
CLIC4	0.547086	0.504484	0.475125	0.407742	0.228609	0.368225	0.33391	0.63472	0.303052	0.281025	0.0950932	0.166831	0.429678	0
RUNX3	0.423618	1.03814	0.270551	1.20862	0.672357	0.503983	0.239396	0.209364	0.12411	0.990112	0.315075	0.316294	0.224055	0.215743
RP4-799D16.1	0	0	0	0.0159213	0	0	0	0	0	0	0	0	0	0
SYF2	1.24378	1.07445	0.940482	1.17612	0.995056	1.08723	1.03421	1.50413	1.49444	1.30038	1.72118	1.12141	1.85333	1.81282
C1orf63	1.04928	0.886523	0.991908	1.23232	1.24151	1.3963	1.25024	1.2364	1.38566	1.62724	1.94756	1.03818	2.37103	1.80034
RP3-465N24.6	0.00314668	0.00111659	0.00164304	0.0026428	0.00460288	0.00353728	0.00186891	0	0.00838964	0	0	0.0188242	0	0
TMEM50A	2.50622	2.17476	1.98236	1.80401	1.88872	2.30139	2.1972	1.62917	2.20569	1.98707	2.19209	1.24799	2.04561	2.37073
RHCE	0	0	0	0	0	0	0.00374722	0	0	0.00191615	0	0	0	0
TMEM57	0.160399	0.146158	0.130646	0.108181	0.0412207	0.13774	0.204136	0.167688	0.0793705	0.204115	0.0687491	0.2067	0.355029	0
LDLRAP1	0.0398835	0.0782473	0.0637937	0.0502329	0.0338449	0.0508142	0.0427024	0.047866	0.0406318	0.0926463	0	0	0	0
RP11-70P17.1	0.00113572	0.000553633	0.00104982	0	0	0.00267907	0.00341009	0.00420877	0	0.00417386	0	0	0	0
MAN1C1	0.0340321	0.0388448	0.0758512	0.0313731	0.0140602	0.0466866	0.0679038	0.0143695	0.00219054	0.0642332	0	0.0480622	0.158313	0
RP1-187B23.1	0.0186331	0.00476615	0.0228635	0.00212392	0.00954689	0.0205358	0.0182482	0.00252853	0	0.00767762	0	0	0	0
SEPN1	0.117993	0.178237	0.217542	0.0954053	0.0577676	0.204061	0.178235	0.129134	0.0960163	0.108055	0.0607606	0.139777	0	0.0482074
RP1-317E23.3	0	0.00114129	0.00187116	0	0	0	0	0.00355529	0.00580503	0	0	0	0	0
MTFR1L	0.195683	0.137909	0.171483	0.157516	0.126199	0.135442	0.151655	0.158316	0.188727	0.199529	0.0783023	0.118788	0.152283	0.0930613
AL020996.1	0.00102351	0.00344979	0.00138756	0	0	0	0.00398804	0.00135264	0	0.00595189	0.0103185	0	0	0
AUNIP	0.00436391	0.0535255	0.00201706	0.019332	0.00862634	0.00399021	0.00645747	0.00442691	0	0.0182367	0	0	0	0
RP1-125I3.2	0.011263	0.0029632	0.0114139	0	0.00941643	0.00375281	0	0.00726335	0.00176667	0	0	0	0	0
PAQR7	0.0575246	0.0240266	0.0308674	0.058475	0.0774019	0.0456301	0.0354588	0.0360946	0.0249792	0.0400116	0.100413	0	0.159135	0
STMN1	1.55346	14.1754	1.75496	1.55745	2.45197	1.94469	0.991383	0.863425	0.80972	2.30159	0.440452	1.25258	3.1457	3.97683
PAFAH2	0.0344306	0.0515576	0.05716	0.0338807	0.0111646	0.0995133	0.045493	0.0589886	0.0683782	0.0166661	0.0285417	0.0304296	0.180121	0.456379
SLC30A2	0.0130968	0.00356366	0.00397238	0.0069821	0	0	0	0	0	0.00208985	0	0	0.420648	0
TRIM63	0	0	0	0	0	0	0	0	0.00783734	0	0	0	0.626981	0
PDIK1L	0.041573	0.0517995	0.039563	0.0261529	0.00914039	0.0572834	0.0280926	0.0335762	0.022198	0.0369244	0.0378636	0	0.0535699	0.0477102
ZNF593	0.433219	0.377536	0.381972	0.45408	0.264602	0.550179	0.446746	0.342548	0.365537	0.372015	0.363739	0.257211	0.898714	0.183779
CNKSR1	0.00843351	0.00612975	0.0187496	0.00752241	0.00316049	0.04029	0.00769557	0.0133102	0.012191	0.00897802	0	0.0251271	0	0.0542597
CEP85	0.0144856	0.0614591	0.0442351	0.0154418	0.0248503	0.0478037	0.018649	0.0171322	0.0179385	0.0278002	0	0.0269399	0	0
SH3BGRL3	8.9904	10.9913	12.3319	13.9098	8.55971	14.6021	10.8375	11.9532	10.3273	14.4354	17.8242	5.90122	15.7512	5.71379
UBXN11	0.124976	0.236726	0.188255	0.112201	0.147882	0.160875	0.139248	0.165957	0.526904	0.231459	0.475693	0.133205	0.0365145	0.0867483
CD52	0.657064	1.91531	2.29772	2.8581	2.30088	2.13499	1.20063	2.38724	34.7149	8.83207	22.7663	4.23393	14.6526	2.66273
AIM1L	0.00349634	0.00201976	0.00465861	0.00996967	0.00435948	0.00281123	0.00324224	0	0	0.0454832	0	0	0	0
ZNF683	0.0176375	0.0184269	0.0671834	0.0136363	0.0800216	0.00961199	0.00372014	0.0481678	0.101332	0.666484	0.0611382	0.0664964	0	0.0482074
LIN28A	0	0	0.00143578	0	0	0	0	0	0	0	0	0.0213107	0	0
DHDDS	0.129535	0.149894	0.180899	0.0880397	0.129048	0.131456	0.124412	0.107485	0.139469	0.133107	0.112381	0.12104	0	0.189607
HMGN2	4.54389	16.8577	3.13996	5.72943	4.2882	3.89672	3.61704	2.63351	2.77678	4.90582	3.77808	3.78172	3.63482	4.37382
RPS6KA1	0.419677	0.431585	0.369776	0.619521	0.387067	0.434212	0.362761	0.257573	0.546271	0.350287	0.213047	0.164504	0.224524	0.26712
RP5-968P14.2	0	0.00264502	0.00364922	0	0	0	0	0	0.00408605	0	0	0	0	0
ARID1A	0.259041	0.448768	0.340483	0.285131	0.208344	0.34811	0.316646	0.183447	0.222128	0.42647	0.316185	0.379752	0.358495	0.183872
PIGV	0.0496741	0.0463064	0.0383601	0.032298	0.0475722	0.0636299	0.0414083	0.0152028	0.0708982	0.0582429	0.0673917	0.0227267	0	0
ZDHHC18	0.0668859	0.0667139	0.0709398	0.0713252	0.0137236	0.0919126	0.0594374	0.0459936	0.035889	0.137862	0.0642719	0.196261	0.0832667	0.0408938
SFN	0.0513389	0.0335349	0.0271396	0.0271176	0.118632	0.105439	0.0388396	0.0425345	0.0775418	0.0835642	0.0130724	0	0.06977	0.158912
GPN2	0.120545	0.124722	0.0941971	0.103429	0.0893069	0.154421	0.134918	0.102629	0.0705708	0.136229	0.0897067	0.128967	0	0.0814047
GPATCH3	0.0758309	0.079615	0.0766428	0.0565084	0.0832521	0.0568564	0.0652822	0.0850668	0.0522841	0.059684	0.0258513	0.0728493	0	0.0954203
NUDC	0.9911	1.45944	0.979663	1.10947	0.962415	1.04616	0.969788	0.918788	0.969622	1.18925	0.619462	0.709697	0.926207	1.06571
C1orf172	0.00742188	0.00286786	0.00693981	0.00753482	0.00237044	0.0106171	0.00661989	0.0104198	0.00730346	0.00147434	0	0	0	0.107699
TRNP1	0.0159953	0.00585946	0.00139323	0.0194199	0.015839	0	0.00272123	0	0.0182845	0.0134127	0	0.0103015	0	0.0867483
FAM46B	0.00133933	0.00387055	0.00261797	0.00380962	0	0.00519915	0.018361	0	0	0.00327407	0	0.0548667	0	0
SLC9A1	0.0377514	0.06211	0.062217	0.059959	0.0358719	0.066197	0.0787869	0.0574548	0.0530067	0.0738492	0.0704164	0.0205831	0.0535699	0.136314
WDTC1	0.123108	0.0879102	0.106031	0.0996362	0.0438404	0.128347	0.0762773	0.111283	0.0745342	0.0733039	0.0581091	0	0	0
TMEM222	0.152005	0.186442	0.230636	0.106981	0.116734	0.161377	0.131642	0.121667	0.135345	0.135069	0.062433	0.0369056	0.120181	0.164231
SYTL1	0.0409738	0.0754659	0.052719	0.0836538	0.068667	0.102097	0.0187745	0.0276701	0.0335351	0.148772	0.419901	0.137887	0	0.0822206
MAP3K6	0.0160362	0.044644	0.0259123	0.0571205	0.010399	0.0250814	0.0335768	0.0396495	0.0117512	0.0482492	0.0422085	0.0689466	0	0
FCN3	0	0.0017411	0.00227451	0.00306792	0.00445796	0	0	0.00103002	0	0	0	0	0	0
CD164L2	0.0149381	0.00647136	0	0.00930668	0.0276915	0	0	0.00152167	0.0154084	0.0198533	0.0136078	0	0	0.102858
GPR3	0.0016725	0.00820766	0.000523594	0.00360167	0	0	0	0.00222999	0	0	0	0	0	0
WASF2	0.760474	1.01548	0.823313	0.691713	0.881239	0.878386	1.02995	0.703641	0.574713	0.827783	0.727245	0.601364	0.540597	0.790771
RP1-159A19.4	0	0	0.0021425	0.00396122	0	0.00296315	0	0	0.0100924	0	0	0	0	0
AHDC1	0.023701	0.0497862	0.0268536	0.0158321	0.0211601	0.0658864	0.0593073	0.0290708	0.027958	0.0520485	0	0.0134868	0	0.0729868
FGR	0.459661	0.532941	0.364461	0.975058	0.546059	0.370977	0.509686	0.626196	2.02282	0.577744	2.55128	0.433859	0.170486	0.265358
IFI6	4.00553	3.19121	2.38104	1.30703	1.01513	3.76646	2.64982	1.88478	4.16533	1.80141	1.75189	0.150492	1.08738	0.435166
FAM76A	0.117434	0.102644	0.0820138	0.12181	0.092647	0.0743876	0.0783024	0.0614741	0.117759	0.114016	0.0962924	0.0882577	0.105405	0.143268
STX12	0.785143	0.543524	0.683348	0.574794	0.577368	0.537825	0.872421	0.563226	0.42814	0.620122	0.446733	0.483124	0.0832667	0.402196
PPP1R8	0.171936	0.274398	0.184952	0.210745	0.0711873	0.20661	0.156144	0.168494	0.176311	0.200605	0.0973041	0.150682	0	0.146889
THEMIS2	1.1345	0.549046	0.944725	0.933681	1.30985	0.566462	1.22989	0.453701	1.08239	0.636006	1.01192	0.461905	0.105405	1.43384
RPA2	0.338776	0.567243	0.339065	0.366274	0.383775	0.372425	0.286948	0.232622	0.385917	0.535472	0.257935	0.547257	0.29935	0.850463
SMPDL3B	0.0036391	0.00552447	0.000977964	0.0393319	0.00156505	0.0248939	0.00313525	0.0102067	0.00253251	0.0101288	0.0767499	0.0427119	0	0.0930613
XKR8	0.0750032	0.0672051	0.0552219	0.0484471	0.0590041	0.0532918	0.0708897	0.0300865	0.0613457	0.0556904	0.0709203	0.0361128	0	0
EYA3	0.0944739	0.111392	0.139025	0.143036	0.14501	0.12129	0.122448	0.0787951	0.073044	0.145261	0.027392	0.10605	0.353585	0
PTAFR	0.596918	0.466889	0.96915	0.51134	0.368756	0.57585	0.620246	0.354006	0.155002	0.419624	0.13359	0.0510536	0.652286	0
DNAJC8	1.22845	1.80069	1.16505	1.15577	1.13649	1.16641	1.05395	1.14168	1.29423	1.2641	0.924284	0.784878	1.48103	1.06361
AL353354.2	0.00264385	0.00640808	0.00225411	0.00207329	0	0.00127628	0.00382772	0.00889996	0	0.0031909	0	0	0.104743	0
ATPIF1	1.78008	2.15237	2.27305	1.53311	1.53328	2.5268	1.3436	1.7959	3.04116	1.84206	1.38879	1.26917	1.04438	2.25934
RP5-1092A3.4	0.00554626	0.00661663	0.0161002	0.0215788	0.00757254	0.0351413	0.00816334	0.0115326	0.0102524	0	0	0.050485	0	0.0867483
SESN2	0.161589	0.10303	0.0810929	0.194381	0.196464	0.0581338	0.145372	0.0942461	0.105655	0.173806	0.0352179	0.0304296	0	0
MED18	0.037744	0.0401779	0.0538505	0.0320781	0.0193097	0.05201	0.0639532	0.0841768	0.025427	0.017747	0.0269503	0.0349677	0	0.0859254
PHACTR4	0.262945	0.344631	0.279759	0.167314	0.139348	0.33618	0.265244	0.239109	0.131285	0.248009	0.111256	0.106237	0.145408	0.0859254
RCC1	0.123822	0.291737	0.124439	0.111718	0.0806625	0.107486	0.0821733	0.0664969	0.126799	0.110611	0.0278379	0.110929	0	0.352537
TRNAU1AP	0.28593	0.413514	0.293703	0.278184	0.169609	0.284268	0.219985	0.403606	0.143658	0.289613	0.0769412	0.239955	0.264464	0.346004
SNHG12	0.50744	0.390932	0.430584	0.570542	0.417425	0.289101	0.271109	2.41512	0.217393	0.368674	0.089514	0.162613	0.256373	0
TAF12	0.460239	0.52188	0.431438	0.53607	0.459142	0.442918	0.493593	0.446584	0.607074	0.478703	0.626256	0.458577	0.181076	0.133956
RAB42	0.472389	0.351386	0.676251	0.286832	0.249974	0.651181	0.331743	1.68094	0.454813	0.275993	0.0293412	0.119125	0.7494	0
RP11-442N24__B.1	0.00973684	0.00704125	0.000519225	0	0.00421009	0.0127302	0.00254015	0	0	0	0	0	0	0
RNU11	0.0090335	0.0269958	0.0130451	0.0274628	0.00347417	0.00147256	0.0446101	0.00476558	0	0.00431811	0.0459238	0	0	0.0814047
GMEB1	0.115717	0.15613	0.129096	0.152506	0.087477	0.102016	0.111985	0.0851305	0.0624865	0.138768	0.091293	0.0547697	0.125054	0.134133
YTHDF2	0.485772	0.648605	0.437595	0.516376	0.47298	0.574455	0.442522	0.317151	0.661471	0.488956	0.224368	0.464506	0.647783	0.545617
EPB41	0.111894	0.101584	0.124274	0.171509	0.067412	0.143837	0.155776	0.130469	0.0767795	0.188589	0.0516785	0.130465	0.204393	0.272401
TMEM200B	0	0.0030658	0	0	0	0	0.00185673	0	0	0	0	0	0	0
SRSF4	0.594118	0.782874	0.492951	0.600029	0.361372	0.512727	0.604108	0.476359	0.442368	0.65176	0.332245	0.410167	0.540659	0.789888
MECR	0.116305	0.0968767	0.0982603	0.0800602	0.0538978	0.0900147	0.08947	0.0486804	0.0698723	0.0966509	0.0427652	0.0714661	0.0365145	0
PTPRU	0.01051	0.00245278	0.00615145	0.0132312	0.00323849	0.0198412	0.000904437	0.0167134	0	0.0056989	0	0	0	0
MATN1	0.00246185	0.00111289	0.00441909	0	0	0	0.00277696	0	0	0.00903933	0	0	0	0
MATN1-AS1	0.00714757	0.0112168	0.014102	0.0075599	0.0110847	0.0102461	0.00812874	0	0.0311236	0.00964915	0.0408334	0	0.0749131	0
LAPTM5	15.4033	11.465	16.3126	9.31679	10.1043	10.6247	13.1601	11.9482	3.28449	9.97314	7.29321	2.68201	7.99503	3.2019
RP1-65J11.1	0	0	0.000619417	0	0	0	0.00175049	0.00420877	0	0	0	0	0	0
SDC3	0.196194	0.170292	1.3295	0.0139719	0.0274899	0.511774	0.158084	0.18212	0.0411903	0.268159	0	0	0	0
PUM1	0.344127	0.355379	0.37162	0.326374	0.228844	0.490945	0.355857	0.291148	0.257864	0.346237	0.39598	0.211997	0.209621	0.384947
SNRNP40	0.309887	0.595991	0.250086	0.385492	0.418351	0.408588	0.298603	0.145724	0.38516	0.379101	0.175889	0.246255	0.467813	0.205125
ZCCHC17	0.352557	0.41228	0.298489	0.280153	0.202667	0.418228	0.392753	0.282009	0.316184	0.329451	0.165873	0.23667	0	0.411138
FABP3	0.106807	0.077599	0.898129	0.011747	0.268627	0.503082	0.0993106	1.26717	0.796778	0.172758	0.0478396	0.0234522	0.0749131	0
SERINC2	0.113896	0.0991489	0.32623	0.065655	0.170496	0.225807	0.0919143	0.499553	0.358124	0.125495	0.188323	0.0247217	0.111259	0.185868
RP11-439L8.4	0.00141216	0.000685288	0	0	0	0	0.00330651	0	0	0	0	0	0	0
TINAGL1	0.0103593	0.0107475	0.0219027	0.0216769	0.0229963	0.019395	0.0305911	0.0109093	0.033686	0.0148249	0.0444895	0.0267094	0.137204	0
PEF1	0.229322	0.271597	0.306631	0.253787	0.27664	0.265888	0.26374	0.210874	0.323687	0.341584	0.0748364	0.293734	0.782441	0.239124
RP11-73M7.9	0	0	0.00124256	0	0	0	0.00183046	0.00510289	0.00612669	0	0	0	0	0
COL16A1	0.0107827	0.00498431	0.00424737	0.00185989	0	0	0.00495791	0.00490599	0.00444528	0.00944184	0	0	0	0
BAI2	0	0	0	0.00186585	0.00644465	0	0	0	0	0	0	0	0	0
SPOCD1	0.00404259	0	0.0054885	0.00123203	0	0.0058768	0.0022798	0.0783963	0.0183716	0.00427372	0	0	0	0
RP11-84A19.2	0	0	0	0.00232449	0.00450039	0.00534592	0	0	0.0167323	0	0	0	0	0
RP11-84A19.4	0.00617634	0.00221845	0.00371769	0.00135792	0.00781326	0	0.00371118	0.00785509	0	0.00764946	0.0569411	0	0	0
PTP4A2	1.43073	1.65884	0.793186	2.14849	1.42661	0.972421	1.4467	0.819085	1.34413	1.87054	1.81212	3.14321	1.16024	0.471798
KHDRBS1	1.11142	1.7085	0.844827	1.36493	0.977602	1.11214	1.34033	0.808373	0.686891	1.33993	1.0121	1.10958	1.2581	0.985666
RP11-277A4.4	0.00249155	0.0106766	0.0115508	0.0147768	0.00636593	0.00269899	0.00150272	0.00989987	0	0.0269225	0	0	0	0
TMEM39B	0.173746	0.173299	0.111823	0.188774	0.109751	0.104157	0.0893956	0.127306	0.0769066	0.132377	0.108576	0.0722891	0.245399	0.292104
KPNA6	0.255667	0.252375	0.219994	0.216766	0.202495	0.22993	0.248103	0.288726	0.231135	0.215249	0.146349	0.200301	0.225376	0.553065
TXLNA	0.0908169	0.146631	0.144264	0.0988462	0.0734659	0.123293	0.161063	0.0900196	0.0925156	0.151935	0.0852868	0.155858	0.072704	0.235324
CCDC28B	0.0623345	0.095285	0.0630377	0.0918736	0.0404849	0.0640894	0.0442645	0.0330069	0.0366945	0.137437	0.0132906	0.172115	0.302703	0.387809
RP4-622L5.7	0.0029969	0	0	0	0	0	0.00476899	0.00161451	0.00461166	0	0	0	0.105405	0
IQCC	0.00435464	0.00747637	0.00472677	0.00311889	0	0.00222393	0	0.01957	0.00292352	0	0	0	0	0
DCDC2B	0.00458798	0	0	0.0044689	0	0	0	0.00166354	0.00750166	0.0112301	0	0	0	0
TMEM234	0.10361	0.0994537	0.132814	0.0784992	0.0790363	0.100613	0.11678	0.116586	0.0607666	0.155687	0.0671677	0.042798	0	0
EIF3I	1.1787	1.48519	1.14635	1.49409	1.39703	1.34713	1.21745	1.23668	1.0081	1.18167	1.01039	1.33466	0.880328	1.28895
FAM167B	0	0	0.0122413	0.00189759	0	0.00182759	0.00507102	0.00204331	0	0.00822125	0	0	0	0
LCK	0.0550769	0.0690442	0.142809	0.0413571	0.0813632	0.0328818	0.0879224	0.181403	0.0875888	1.37901	0.246763	0.0437947	0.0365145	0.0482074
HDAC1	0.295114	0.533691	0.251182	0.351496	0.291966	0.373352	0.290363	0.196373	0.192778	0.428656	0.439867	0.266588	0.327914	0.604495
MARCKSL1	0.600042	0.605293	0.411617	1.08837	0.80412	1.31532	0.81263	0.429928	0.168734	0.706515	0.930558	9.51737	0.0900844	0.661707
TSSK3	0	0	0.00299212	0.00135792	0.00149334	0.0103713	0.00337532	0	0	0	0	0	0	0
FAM229A	0.00479787	0.00933637	0.00512925	0.00743078	0	0.0435604	0.00816208	0.0144442	0.00688574	0.0128995	0	0.0355928	0	0
BSDC1	0.20716	0.165361	0.273924	0.168206	0.123902	0.229719	0.165375	0.234212	0.140617	0.22055	0.139187	0.119688	0.273888	0.383799
ZBTB8A	0.027661	0.032599	0.0162699	0.01645	0.00646433	0.0274347	0.016291	0.0147706	0.0276287	0.0274185	0	0.0137865	0	0.0482074
ZBTB8OS	0.376926	0.508705	0.469735	0.389426	0.330956	0.465596	0.363734	0.453383	0.665178	0.409074	0.505497	0.451283	0.156296	0.663354
RBBP4	0.634863	1.00551	0.44124	0.69021	0.574285	0.720731	0.376187	0.321786	0.657812	0.720181	0.753224	0.56114	0.993697	1.01974
SYNC	0.0481098	0.0721348	0.0420482	0.0796058	0.0743782	0.0669101	0.0326164	0.0715535	0.0976412	0.0495672	0.0083636	0.0734791	0.14208	0.154058
KIAA1522	0.0313474	0.0320063	0.0203809	0.0164625	0.0215392	0.0618377	0.00684137	0.0230006	0.00334929	0.0124079	0	0	0.342076	0
YARS	0.159577	0.22374	0.196076	0.252773	0.100768	0.163552	0.199942	0.170053	0.129222	0.248846	0.0788217	0.182969	0.238056	0.104242
S100PBP	0.114655	0.165609	0.145403	0.166743	0.138229	0.102649	0.135182	0.100933	0.0281986	0.119295	0.115024	0.0450471	0.23144	0.262091
HPCA	0.00157221	0	0	0.00139723	0	0	0	0.00382218	0	0	0	0	0	0
TMEM54	0.0243077	0.011411	0.0259877	0.0191071	0.0111506	0.0122164	0.0101372	0.00946987	0.018694	0.0183084	0.0764753	0	0	0
RNF19B	0.114207	0.0889534	0.155814	0.0922538	0.103197	0.174632	0.143182	0.145922	0.0558957	0.13504	0.303111	0.238648	0	0.0859254
AK2	0.760977	1.06424	0.702297	0.907789	0.76883	0.751908	0.69709	0.894559	0.54469	0.611279	0.428694	0.434045	0.709424	0.893857
ADC	0.00382349	0.0145776	0.0215006	0.0191446	0.0441668	0.0399971	0.00537176	0.00291165	0.00763664	0.0212082	0	0	0.0535699	0.188392
TRIM62	0.0124468	0.00519318	0.00304901	0.0145887	0	0.00816498	0.00586739	0.0109408	0.0102726	0.0396251	0	0	0	0
ZNF362	0.0488358	0.0651219	0.104198	0.0496058	0.0239818	0.0479045	0.0727046	0.030434	0.0426671	0.0540254	0.0167044	0.0119669	0.0535699	0.227016
PHC2	0.449096	0.441094	0.36351	0.343869	0.145644	0.199135	0.523418	0.466071	0.181843	0.234019	0.73153	0.10922	0	0.195285
ZSCAN20	0.00331667	0.0100086	0.0104113	0	0.00289708	0	0.0097386	0.00596405	0	0.0177554	0	0	0	0
CSMD2	0	0	0.000633606	0	0.00318418	0	0.00180791	0.00131159	0	0	0	0	0	0
SMIM12	0.367318	0.42811	0.482425	0.418139	0.297717	0.431106	0.529937	0.334978	0.468256	0.451356	0.181922	0.504191	0.0730289	0
GJB5	0.00493585	0	0	0	0	0.0066386	0	0	0	0	0	0	0	0
GJB4	0.00703447	0	0	0	0	0	0	0	0	0	0	0	0	0
GJB3	0.0062709	0	0.000783626	0.00295194	0.00634063	0.00168665	0.00379302	0	0.0077741	0	0	0.0369965	0.0820856	0
GJA4	0	0.00126783	0.0167288	0.00427895	0.0130749	0.00130815	0	0.0142127	0.00681427	0.00224257	0	0	0	0
DLGAP3	0.0731092	0.063272	0.0362008	0.0787558	0.0438969	0.0294912	0.0714812	0.0168063	0	0.0408926	0	0	0	0.0565313
RP11-244H3.4	0.0267597	0.0166857	0.0110565	0.00268541	0.0138449	0.00695878	0.00550292	0.00594201	0	0.0223648	0.0232884	0.0340307	0.0535699	0
ZMYM6NB	0.000988733	0.00207511	0	0	0.00118175	0.00193475	0	0	0	0	0	0	0	0.102883
ZMYM6	0.106631	0.0989075	0.096076	0.090875	0.0802704	0.0996444	0.118537	0.0409197	0.0781309	0.15321	0.0385233	0.0986413	0	0.277188
ZMYM1	0.0539683	0.127198	0.0346544	0.068104	0.0385847	0.0411486	0.0395999	0.0263588	0.0601551	0.0591449	0.0132906	0.0345321	0	0
SFPQ	1.26194	2.29552	1.05396	1.40966	1.29838	1.4425	1.58503	0.810572	0.650101	1.50152	1.42211	1.32204	1.41378	2.13081
ZMYM4	0.159619	0.16247	0.161364	0.158798	0.0609344	0.227878	0.242395	0.107674	0.0836018	0.173116	0.188789	0.171288	0	0.199388
KIAA0319L	0.114793	0.120474	0.144769	0.0882846	0.0505561	0.168827	0.143985	0.112845	0.114869	0.123281	0.205481	0.0325064	0.072704	0.0542597
NCDN	0.0182359	0.0256433	0.0231365	0.0254866	0.0152135	0.0383748	0.0116304	0.0203079	0.0116787	0.0296644	0.0124124	0	0	0.102374
RP4-728D4.2	0.0111758	0.00991929	0.0330261	0.0101647	0.00896638	0.016206	0.0251969	0.0223488	0.012832	0.0447545	0	0	0	0
TFAP2E	0.00094127	0.00604431	0.011243	0.0027171	0	0.00281123	0.00362952	0.0122426	0	0	0	0	0	0
PSMB2	1.00968	1.62671	1.30684	1.18826	1.14502	1.35378	1.27755	0.991398	1.34204	1.10857	1.05966	1.19359	1.38861	1.6087
C1orf216	0.0394486	0.032218	0.0868707	0.0325606	0.0270582	0.0370624	0.0380506	0.0339387	0.0408826	0.0545112	0	0	0	0
CLSPN	0.0642564	1.02691	0.0617896	0.128719	0.0711046	0.162181	0.0930196	0.00833406	0.0114083	0.170618	0.0443894	0.0344646	0	0.090712
AGO4	0.112092	0.130795	0.137946	0.118349	0.0751898	0.0904209	0.151438	0.173148	0.0787592	0.144034	0.0419175	0.0325873	0	0
AGO1	0.0801578	0.085904	0.12018	0.0704905	0.0510312	0.0765436	0.0759308	0.103325	0.127758	0.119822	0.0898282	0.0224737	0.170486	0.129278
RP4-789D17.5	0.00108647	0.00224382	0	0.00185	0	0	0	0.0116838	0	0.00150202	0	0	0	0
AGO3	0.10454	0.168486	0.212371	0.113113	0.195983	0.25796	0.143321	0.146657	0.135387	0.253346	0.143891	0.250485	0.416204	0.102883
TEKT2	0.0321607	0.0132998	0.00627001	0.017553	0.041834	0	0.0133364	0.00484591	0.0349882	0.0143392	0.104044	0	0	0
ADPRHL2	0.330443	0.387256	0.438259	0.302666	0.241583	0.328636	0.321391	0.349362	0.219647	0.265622	0.267086	0.0792458	0.285061	0.24971
COL8A2	0.0598675	0.0905672	0.0599554	0.0969375	0.0271811	0.102372	0.033212	0.0277677	0.0719433	0.0325019	0	0	0	0
TRAPPC3	0.733442	0.773661	0.74291	0.716993	0.575832	0.752066	0.78299	0.466293	0.807145	0.623436	0.436841	0.45067	0.70298	0.254717
MAP7D1	0.4404	0.624351	0.59971	0.515346	0.456595	0.509776	0.458707	0.452967	0.635659	0.566183	0.281119	0.345384	0.47606	0.626835
THRAP3	0.777229	1.33141	0.631331	0.999516	0.819838	0.879316	0.911089	0.57132	0.762452	1.15765	0.676848	0.866952	0.846353	1.2233
SH3D21	0.0783554	0.0341028	0.0692879	0.0506785	0.0742901	0.0406998	0.0276679	0.196795	0.0831765	0.0783233	0.0247877	0.110447	0	0.26791
EVA1B	0.260418	0.113336	0.338978	0.119521	0.0527907	0.179274	0.223844	0.127034	0.0438133	0.162596	0.115673	0.14759	0.0836344	0
RP11-268J15.5	0.00729858	0.00465985	0.00703825	0.00251186	0.00339648	0.00866604	0.00997821	0.0193605	0.0204355	0.00438283	0	0.0301281	0	0
STK40	0.0863908	0.0890551	0.178369	0.0809729	0.170184	0.106061	0.133203	0.137724	0.081738	0.106406	0.0909369	0.0854549	0.15479	0.0408938
LSM10	0.759796	0.664774	0.828172	0.654217	0.489685	0.794279	0.957594	0.443454	0.617319	0.717169	0.601581	0.479074	0.431055	1.16004
OSCP1	0.0358817	0.0159559	0.0205801	0.0136878	0.029836	0.0321627	0.0177353	0.0148949	0.0589024	0.0189809	0.0469814	0	0	0
MRPS15	0.737027	1.10301	0.882528	0.897803	0.528568	0.927897	0.691946	0.746975	0.825383	0.756917	0.40487	0.499379	0.600114	0.256968
CSF3R	0.705895	0.458171	0.593086	0.61192	0.54594	0.573752	0.506748	0.251895	0.26824	0.520851	1.00069	0.142831	0.10714	0.175361
LINC01137	0.0414542	0.025313	0.0341566	0.0166436	0	0.0258983	0.0214457	0.0224033	0.0207235	0.0249366	0.0463263	0	0.0749131	0.0408938
ZC3H12A	0.138414	0.143307	0.139322	0.213333	0.78752	0.0558049	0.216594	0.275945	0.636893	0.37484	0.677388	0.329585	0.723196	0.379685
MEAF6	0.827415	0.865803	0.541978	0.725396	0.742629	0.742623	0.578444	0.633591	1.32891	0.887052	0.695969	0.713393	0.944791	0.67865
SNIP1	0.0417118	0.0587312	0.0387807	0.0609167	0.0471986	0.0847257	0.0506191	0.0326662	0.0331753	0.0795234	0	0.053048	0.105565	0
DNALI1	0.0604498	0.0289691	0.0232338	0.0297679	0.097125	0	0.0162522	0.0119338	0.048033	0.0477176	0.136768	0.0519	0.120181	0
GNL2	0.245773	0.35721	0.229276	0.283488	0.25956	0.249932	0.271182	0.177724	0.204023	0.308141	0.164355	0.164317	0.199799	0.169675
C1orf109	0.0490863	0.0424786	0.0495245	0.0253016	0.0209706	0.0498322	0.0547346	0.0240457	0.0457341	0.056492	0.0130724	0.0101188	0.295539	0.193595
CDCA8	0.0214422	0.481455	0.0277989	0.0194508	0.0139307	0.0318074	0.00962455	0.0320853	0	0.0627793	0	0.0327752	0	0
MANEAL	0.0147884	0.0154762	0.0116302	0	0.00843078	0.034864	0.00590356	0.0194216	0	0.00992015	0	0	0	0
YRDC	0.100808	0.133604	0.0678577	0.115462	0.143807	0.0838344	0.119657	0.0655532	0.166673	0.11807	0.137712	0.142871	0.266496	0.130428
C1orf122	0.591125	0.573809	0.616997	0.410641	0.365828	0.448737	0.94987	0.621796	0.435895	0.478938	0.235837	0.349009	0.387934	0.580568
MTF1	0.142262	0.111538	0.11606	0.134582	0.0760646	0.12173	0.148524	0.173319	0.084465	0.111631	0.0819705	0.0269394	0.072704	0
INPP5B	0.0778911	0.117051	0.0680895	0.112701	0.052622	0.0825055	0.0848199	0.0503048	0.0261634	0.0704338	0.0265175	0.0220857	0	0.193625
SF3A3	0.302855	0.584033	0.341986	0.359908	0.252786	0.406195	0.358162	0.178554	0.231255	0.330687	0.15505	0.13244	0.190407	0.320099
FHL3	0.357176	0.249184	0.20886	0.50175	0.173233	0.187833	0.253273	0.116423	0.0551895	0.23543	0.13878	0.0606524	0.626342	0.0810708
UTP11L	0.380086	0.48215	0.313412	0.394504	0.314659	0.318169	0.296847	0.211039	0.35538	0.341192	0.332798	0.224895	0.724322	0.102883
POU3F1	0.00588576	0.00411812	0.012234	0.0118959	0.0116605	0	0.004094	0.00638952	0	0.00827118	0	0.0802662	0	0
RRAGC	0.288753	0.355886	0.397056	0.251486	0.34907	0.262666	0.368061	0.581846	0.356108	0.319459	0.2416	0.14522	0.158309	0.129995
RP5-864K19.4	0.0160823	0.0129132	0.0303498	0.016179	0.0172981	0.02586	0.0203859	0.00800658	0.015841	0.0109929	0	0.0358722	0	0
MYCBP	0.20177	0.319686	0.0900049	0.217222	0.163225	0.161489	0.118235	0.0519958	0.145613	0.160143	0.122602	0.0775895	0.220478	0.455949
RHBDL2	0.0021011	0	0.00148759	0	0	0.00659181	0	0.00468187	0	0.0134174	0	0	0	0
AKIRIN1	0.332793	0.367092	0.265275	0.409703	0.386816	0.327585	0.355545	0.187416	0.386264	0.448427	0.444582	0.341318	0.870535	0.878527
NDUFS5	3.70101	4.32853	3.78208	3.88281	2.57261	4.55236	3.01172	3.4763	4.09161	3.31667	3.00884	2.29571	3.3101	4.01813
MACF1	0.523318	0.529471	0.458191	0.503316	0.315267	0.571128	0.651091	0.683704	0.189856	0.778151	0.388798	0.55297	0.373456	0.165051
KIAA0754	0.0410218	0.0307346	0.0334477	0.0363575	0.0340472	0.00968463	0.0119431	0.0309423	0.00276208	0.0524243	0.075985	0.0397988	0	0
RP11-69E11.4	0.0490556	0.0312376	0.0715132	0.0292998	0.0806405	0.0318702	0.0630751	0.130845	0.368468	0.0953739	0.0725741	0.0263608	0.0535699	0
PABPC4	0.809579	0.661653	0.7157	0.866131	1.00728	0.691547	0.898206	1.00646	1.43599	0.644976	0.955766	0.771849	0.662863	0.642748
HEYL	0	0.000587631	0.00830658	0	0	0	0.00203447	0.0073746	0.00380898	0.00626614	0	0	0	0
PPIE	0.335883	0.369062	0.275792	0.309945	0.215726	0.29321	0.277034	0.277268	0.24946	0.379428	0.227389	0.188559	0.072704	0.268609
BMP8B	0.00181361	0.0119299	0.00115183	0.00370714	0.00383984	0.00420248	0	0.00206162	0	0	0	0	0	0
OXCT2	0.00990923	0.0050469	0.00244598	0.00339811	0.0366395	0	0.00389065	0	0.0113328	0.00549728	0	0.0955083	0	0
TRIT1	0.0961312	0.10362	0.0543224	0.110003	0.0548265	0.0979919	0.0893284	0.0664122	0.0715986	0.0560954	0.0528323	0.101169	0	0.0817875
MYCL	0.0619158	0.0976684	0.0309078	0.104881	0.039822	0.0225802	0.0154668	0.00790371	0.0383303	0.0419423	0.0284093	0.164174	0	0.292849
MFSD2A	0.102029	0.107686	0.0583704	0.177929	0.103477	0.0592968	0.045024	0.161834	0.446147	0.0887939	0.0518556	0.0621602	0.0832667	0.18877
CAP1	3.68875	4.084	3.26948	4.64128	3.93726	3.10564	3.57333	2.18904	1.97697	3.66539	2.51482	2.87328	2.58805	1.71998
PPT1	4.5325	4.21434	2.67875	3.32437	3.80718	3.27599	3.46268	1.18006	4.38234	2.59346	1.89941	4.35561	1.07214	0
RLF	0.213664	0.240417	0.143253	0.268273	0.214774	0.110004	0.227822	0.327566	0.206917	0.231211	0.20736	0.096382	0.194242	0.198776
RP1-39G22.7	0.0266244	0.031067	0.0347582	0.0295692	0.02735	0.0510104	0.0199565	0.0289242	0.014013	0.0279661	0.017972	0.013753	0.0740609	0
ZMPSTE24	0.322359	0.308926	0.270261	0.271513	0.293353	0.341901	0.311118	0.165528	0.254715	0.270396	0.24772	0.203913	0	0.298896
COL9A2	0.0268081	0.0543776	0.0293505	0.0902523	0.0585282	0.0410538	0.0072504	0.0620363	0.0407781	0.0694414	0.0139658	0.0241866	0.158975	0.0814047
SMAP2	0.51624	0.515939	0.418393	0.940622	0.807994	0.254232	1.12431	0.340559	0.842792	0.966339	2.20561	0.826954	0.490235	0.500445
ZFP69B	0	0.00253573	0.0067485	0.00770562	0.00238238	0.0116559	0.014772	0.00217397	0.00487491	0.00748137	0	0	0	0
ZFP69	0.00963991	0.0091789	0.0156049	0.011859	0.0100486	0.0127789	0.0170778	0.00424924	0.0031986	0.00886339	0.0428284	0.0325698	0	0
RP11-656D10.3	0.00353415	0.00223499	0.00798012	0	0.00772931	0	0.00139367	0	0	0.00490811	0.0278379	0.0103015	0	0
EXO5	0.020768	0.0557467	0.0254681	0.0302525	0.00594567	0.0283987	0.0133306	0.0130475	0.0501472	0.0350707	0.0153261	0.00841057	0	0
ZNF684	0.0151884	0.0522734	0.0313843	0.00665538	0.0139866	0.0292015	0.026831	0.0172861	0.0750273	0.0128609	0.0466778	0	0.0820856	0
RIMS3	0.00207387	0.00818625	0.0111565	0	0.00737376	0.00303845	0.00244157	0.0109675	0.0107597	0.00518102	0	0	0	0.0615839
NFYC-AS1	0.0106343	0.00857295	0.00876013	0.00983929	0.0122235	0.00586304	0.0166164	0.00234472	0.0126321	0.0196517	0.028182	0	0	0
NFYC	0.370449	0.426881	0.318676	0.366493	0.286545	0.272017	0.344135	0.363773	0.238613	0.511103	0.292168	0.241726	0.188832	0.265906
CITED4	0.165351	0.157161	0.0590407	0.142551	0.11463	0.224722	0.087202	0.0616466	0.158084	0.138442	0.133356	0.122897	0	0.172331
CTPS1	0.0509395	0.141217	0.0328664	0.0807937	0.0670549	0.0572049	0.0659666	0.0200959	0.0453069	0.0688654	0.0307779	0.0184167	0	0
SLFNL1	0.000783892	0.0010635	0	0	0	0.00374267	0	0	0	0	0	0	0	0
SCMH1	0.0231618	0.0673529	0.0298545	0.035574	0.0210684	0.0742858	0.0341261	0.0177353	0.0332917	0.0533438	0.039808	0.118463	0	0.122298
EDN2	0.00870449	0.00836888	0.0104437	0.00918046	0.0140827	0	0	0.00113731	0.0236814	0.0219162	0.0378636	0	0	0
HIVEP3	0.0967043	0.144576	0.0709034	0.147264	0.104941	0.126138	0.109849	0.00357236	0.0114114	0.150031	0.158154	0.0886775	0	0.239124
FOXJ3	0.107837	0.0993546	0.0942792	0.105524	0.0744257	0.13948	0.10792	0.131215	0.0832618	0.117354	0.0738272	0.105891	0.0365145	0.254493
RIMKLA	0.0335201	0.0251538	0.010065	0.021679	0	0.0027231	0.00327439	0.0347086	0	0.0349564	0	0	0	0
ZMYND12	0.014563	0.0136595	0.0171439	0.00673113	0.0313204	0.025294	0.0104999	0.0187066	0.0420344	0.0176979	0	0.0796327	0	0
PPCS	0.715262	0.661631	0.795868	0.594193	0.689592	0.740506	0.812833	0.613849	1.03564	0.739355	0.63882	0.423039	0.486261	0.565406
CCDC30	0.022709	0.00936019	0.0334466	0.0083133	0.00493765	0.0388352	0.0188067	0.0572735	0.0448387	0.039029	0	0	0.0365145	0
PPIH	0.268567	0.661736	0.319761	0.331434	0.243519	0.338717	0.280803	0.256834	0.187796	0.359128	0.204149	0.242786	0.0968542	0.110791
RP5-994D16.3	0.00115217	0.00286627	0.00147046	0	0	0.00602617	0	0	0	0	0	0	0	0
YBX1	10.6388	15.2863	10.6988	12.9302	12.3975	10.2797	14.1716	11.0284	18.7177	9.84124	11.0248	8.99639	10.7604	5.06021
CLDN19	0.00321537	0	0	0	0	0	0	0	0	0	0.0139658	0	0	0
LEPRE1	0.113345	0.127431	0.138067	0.120155	0.090159	0.147643	0.120113	0.0873169	0.030939	0.127335	0.0304236	0.0726625	0.0535699	0.0729868
C1orf50	0.174403	0.152995	0.18667	0.185574	0.141361	0.193635	0.190205	0.179804	0.158743	0.198649	0.0791807	0.164127	0.0740609	0.208216
CCDC23	0.712365	0.663725	0.624571	0.69628	0.628301	0.633533	0.543499	0.705461	0.157149	0.579022	0.352041	0.212718	0.424294	0.19952
ERMAP	0.0747016	0.0682244	0.0541656	0.0598857	0.0349106	0.0549166	0.0483859	0.0527596	0.0274587	0.0507247	0.037301	0.0499985	0	0.107699
RP11-342M1.3	0.0181196	0.0276804	0.021729	0.0186808	0.0211328	0.00721217	0.0135287	0.0540151	0.0439359	0.0103919	0	0	0	0
ZNF691	0.0721036	0.0644144	0.0941037	0.0448925	0.0528099	0.0872887	0.0584165	0.039851	0.0272298	0.0424008	0	0.049156	0	0.0951534
SLC2A1	0.221519	0.168094	0.278012	0.331757	0.114539	0.212833	0.0410718	3.11485	0.155472	0.314669	0.113638	0.101735	0.105565	0.41135
SLC2A1-AS1	0.00350849	0.00565941	0.00840545	0.0118372	0	0.0185939	0	0.00936294	0.0365274	0.00247063	0.0255558	0.0183377	0	0
FAM183A	0.0550337	0.0443654	0.00128456	0.055034	0.185947	0.00385749	0.0251594	0	0.206433	0.10843	0.124352	0.0224685	0	0
EBNA1BP2	0.281	0.439678	0.281744	0.355335	0.199802	0.331294	0.328024	0.212383	0.273402	0.25648	0.246077	0.153237	0.267574	0.309636
WDR65	0.002806	0.00457451	0	0.00931749	0.0126566	0	0	0	0	0.00822728	0	0	0	0
TMEM125	0.0282957	0.00338644	0.0085452	0.021865	0	0.0382574	0.00632944	0.0016776	0.009092	0	0.0495451	0	0	0
C1orf210	0.00790298	0.00340844	0.00504287	0.00199675	0.00358089	0.0354316	0.00175421	0	0.00739245	0	0.0165428	0	0	0
TIE1	0.00330599	0.000686362	0.00598628	0.0062256	0.00370092	0.00495867	0.00467422	0.00745742	0.00962757	0.0286826	0.0165428	0	0.164829	0
RP1-92O14.3	0.000593799	0.00309099	0.000980928	0	0	0.0096216	0.00490771	0.0111963	0.0232395	0	0	0	0	0
CDC20	0.0461652	1.33489	0.0251161	0.0516655	0.0306072	0.0458724	0.0125635	0.0483291	0.00748402	0.113558	0.0276855	0.0361284	0.0740609	0
ELOVL1	0.383125	0.450915	0.504531	0.342288	0.360905	0.425313	0.419125	0.311254	0.303854	0.313079	0.110021	0.386252	0.0535699	0.330241
MED8	0.291721	0.356661	0.268286	0.238172	0.18708	0.350636	0.294878	0.263491	0.310569	0.29322	0.120262	0.210979	0.225746	0.0729868
SZT2	0.0514969	0.060967	0.0944705	0.0286944	0.0238848	0.077995	0.0394265	0.0495588	0.0154001	0.0672269	0.0108378	0.0789846	0	0.107699
HYI	0.131249	0.238013	0.14921	0.138899	0.134589	0.165988	0.138941	0.197667	0.153085	0.0876146	0.0695915	0.0369254	0.072704	0
PTPRF	0.0406395	0.0360268	0.0101585	0.0455653	0.0208137	0.111726	0.0159195	0.0430771	0.0298502	0.0177757	0.0192014	0.0488215	0	0.0816187
KDM4A	0.0687928	0.0577088	0.060995	0.0561105	0.0349703	0.0749765	0.0726907	0.0212182	0.0235027	0.0470507	0.0399997	0.0656886	0.0978091	0
KDM4A-AS1	0.00458024	0.0170056	0.00191779	0.00575335	0.00558562	0.009914	0.0037141	0.00375071	0	0.0144869	0	0	0	0
ST3GAL3	0.0158387	0.0417836	0.0275833	0.016157	0.0204797	0.0151006	0.0232593	0.0157763	0.0262608	0.0275997	0	0.00811528	0.252117	0
ARTN	0	0.000846971	0.00126713	0.00139623	0.00413712	0	0.00147288	0.00631985	0	0	0	0	0	0
RP11-7O11.3	0	0.00242225	0	0.00317731	0	0.00729731	0	0.00206162	0	0	0	0	0	0
IPO13	0.0523384	0.0522319	0.0780891	0.0352652	0.0498812	0.0464829	0.0595069	0.0473411	0.0617195	0.0684	0.027392	0.0134868	0	0
DPH2	0.0463057	0.0598954	0.0491207	0.0451564	0.0574613	0.0593044	0.0583689	0.0276052	0.0657398	0.0535688	0.0289179	0.0643855	0	0
ATP6V0B	4.9146	4.38133	4.27725	3.71094	4.05152	5.16722	4.67804	2.9614	8.89364	3.52979	3.87844	2.34958	3.02562	3.03873
B4GALT2	0.0193222	0.0358413	0.00656211	0.01575	0.00702206	0.0431374	0.0224811	0.020182	0.0219322	0.0421903	0.0667716	0.0205435	0	0
CCDC24	0.0392089	0.0274778	0.0531053	0.0221115	0.0642796	0.0486494	0.0530211	0.036041	0.019426	0.0327147	0.0403047	0	0.0365145	0.0408938
SLC6A9	0.00663516	0.00661381	0	0	0	0.0889994	0	0.0121729	0	0	0	0	0	0
RP5-1198O20.4	0.0016907	0	0	0	0	0.00160033	0.004323	0	0	0	0	0	0	0
DMAP1	0.175297	0.207348	0.180936	0.143442	0.156875	0.243764	0.153249	0.16413	0.15286	0.176032	0.121611	0.0591498	0	0.107699
ERI3	0.249319	0.313158	0.218311	0.23045	0.30375	0.248402	0.25656	0.181896	0.281632	0.176751	0.135533	0.167185	0.221835	0.268105
RNF220	0.112524	0.151561	0.147354	0.0914253	0.0935673	0.192219	0.124386	0.112559	0.180577	0.167199	0.132884	0.0570946	0	0.17587
TMEM53	0.0588592	0.027884	0.0976742	0.0451497	0.0677925	0.0340616	0.0693264	0.076807	0.128534	0.0463438	0.0308633	0.00841057	0	0.242889
C1orf228	0.0212778	0.0365595	0.036644	0.0275892	0.0345219	0.0391388	0.055834	0.0209105	0.087811	0.0772649	0.0184015	0	1.39596	0.662496
KIF2C	0.00920309	0.50284	0.00936989	0.0145515	0.0108674	0.00905061	0.00471812	0.0210435	0.00764222	0.0471907	0	0.00811528	0	0
RP11-269F19.2	0	0.000759279	0	0.0011378	0	0	0	0	0	0	0	0	0.104743	0.0810708
RPS8	25.1411	23.6436	20.2045	32.9332	22.9057	24.6987	27.8754	23.4714	30.4489	23.9286	33.1839	37.464	37.4645	49.7359
BEST4	0.00755324	0.00543383	0.00111923	0	0	0.0042203	0	0.00882811	0.00730854	0.0130733	0.0199176	0	0	0
PLK3	0.468473	0.351305	0.316769	0.373238	1.3573	0.252968	0.520691	0.565995	0.45349	0.793132	0.720184	0.677551	1.94555	0.184752
TCTEX1D4	0.0128556	0.00292891	0	0.00586022	0.0174373	0	0.00399325	0.00405631	0.0246257	0.00489248	0	0	0	0
BTBD19	0.0337032	0.0125725	0.0122018	0.0068858	0.0645834	0.022584	0.0237622	0.031344	0.0443187	0.0359581	0.0354617	0.0224685	0.0885395	0
PTCH2	0.0639127	0.0632294	0.0357236	0.05469	0.0437046	0.0724846	0.0868345	0.0324815	0.0293715	0.0181448	0.0857284	0	0	0.0477102
EIF2B3	0.165828	0.208246	0.15767	0.182524	0.212121	0.157965	0.167294	0.0946955	0.149754	0.173631	0.159872	0.131123	0.142474	0.102374
HECTD3	0.0485045	0.0830994	0.0939985	0.018768	0.0443465	0.0827011	0.0577307	0.0798481	0.0473914	0.0484254	0	0.036041	0	0
UROD	0.333596	0.43632	0.415484	0.377226	0.401236	0.353666	0.286158	0.269268	0.509393	0.372763	0.214668	0.294543	0.196044	0.154645
HPDL	0	0.0114098	0.00136464	0.000791619	0.00314186	0	0	0	0.00358169	0.00191615	0	0	0	0
MUTYH	0.0514324	0.102093	0.0612598	0.0802888	0.0884558	0.0591977	0.0459806	0.0303095	0.0457531	0.0939541	0.0810626	0.107262	0	0.0542597
TOE1	0.046698	0.0965279	0.0362844	0.0519269	0.0329374	0.0558138	0.0526231	0.0404872	0.0248116	0.0407769	0.0233774	0.0219018	0	0
TESK2	0.0385349	0.0368547	0.0532015	0.036327	0.0160949	0.0337948	0.0376969	0.282316	0.0937965	0.0307117	0	0.0306623	0.0535699	0
CCDC163P	0.00583642	0.00995787	0.0021664	0.0036313	0.00130882	0.00805995	0.00925348	0.0199024	0.0119606	0.0161795	0.0293412	0	0.0740609	0
MMACHC	0.00483941	0.00250454	0.00825245	0.00232914	0	0.0192747	0.00650066	0.00758357	0.00362902	0.00118875	0	0.0103015	0	0
PRDX1	7.12713	6.56763	9.42141	5.91534	5.33926	9.39217	6.25217	5.87053	9.49682	5.0382	2.59568	2.94332	6.67334	2.14543
AKR1A1	2.22328	2.16654	2.84127	1.64603	1.75762	2.62171	2.37949	1.2499	1.99727	1.54109	0.431499	1.00849	1.27845	1.01675
NASP	0.582832	1.47381	0.603082	0.624406	0.55465	0.825286	0.753918	0.466228	0.0987664	0.720848	0.258331	0.388131	0.54108	0.740163
CCDC17	0.0505751	0.0253148	0.00632711	0.0407733	0.0171416	0.0123656	0.0119366	0.00597275	0.00641138	0.0137961	0.0354185	0.0205435	0	0
GPBP1L1	0.333049	0.36743	0.276132	0.327935	0.318616	0.378434	0.279795	0.235125	0.40847	0.365046	0.29835	0.352611	0.541092	0.159435
TMEM69	0.278438	0.275036	0.203445	0.215791	0.160781	0.245191	0.255028	0.167629	0.170246	0.171054	0.0972351	0.253915	0	0
IPP	0.00598475	0.0101606	0.0055115	0.00575196	0.00293199	0.0115001	0.00814715	0.0066407	0.0136808	0.0425304	0.0130724	0.0477037	0	0
MAST2	0.0380429	0.103609	0.045919	0.035174	0.016908	0.0345279	0.0428343	0.0465196	0.0183195	0.0437992	0.0128912	0	0.0836344	0.0615839
PIK3R3	0.0889509	0.0880309	0.100484	0.0329946	0.0344125	0.130813	0.0409996	0.0342429	0.0218838	0.0382526	0.0332981	0.0214701	0	0.177039
RP4-533D7.5	0.000943977	0.00111086	0	0	0	0.00772711	0	0.00155901	0.005574	0	0	0	0	0
TSPAN1	0.156886	0.115811	0.0625077	0.11115	0.180361	0.431603	0.0682106	0.0855836	0.197529	0.0986264	0.102484	0.115797	0.274048	0.163385
POMGNT1	0.164295	0.109857	0.158755	0.109812	0.291668	0.0834277	0.0986941	0.069019	0.154442	0.112734	0.134311	0.114465	0.179656	0
LURAP1	0.00473777	0.00105185	0.0136421	0.00139723	0.0205148	0.00768405	0.00303476	0.00238066	0.0334441	0.00486213	0	0	0	0
RAD54L	0.00491922	0.0853574	0.00620232	0.00770128	0.00680601	0.0140032	0	0.00842693	0	0.0261634	0	0	0	0
LRRC41	0.213468	0.146394	0.211575	0.220541	0.188388	0.176515	0.213628	0.145298	0.134857	0.144547	0.102707	0.104242	0.249293	0.166996
UQCRH	4.03718	4.6558	3.19438	4.82093	3.23014	5.20749	3.65388	3.36414	2.57817	3.18826	4.11104	3.61855	4.46315	3.30147
NSUN4	0.0743827	0.0711112	0.0750519	0.0774435	0.0690296	0.0708459	0.088159	0.0704719	0.0662077	0.0655089	0.101077	0.0567622	0	0.308918
FAAH	0.00792632	0.0117858	0.0031359	0.0282696	0.0163958	0.0196288	0.0108478	0.00594058	0.00987036	0.0160473	0.0108378	0.019063	0	0.107699
LINC00505	0	0	0	0	0	0	0	0	0	0	0.0413357	0	0	0.346567
DMBX1	0	0	0	0	0	0	0	0.00697286	0	0	0	0	0	0
MKNK1	0.555349	0.48149	0.663435	0.596538	0.707958	0.467743	0.803767	0.213092	0.114414	0.500828	0.308967	0.0412402	0.111259	0.0959176
MOB3C	0.0489307	0.0456054	0.0616226	0.0633571	0.103962	0.0575297	0.0993618	0.0561553	0.0131263	0.0656129	0.0550685	0	0	0.0816187
ATPAF1	0.183424	0.324407	0.211478	0.151019	0.17574	0.225663	0.203478	0.190277	0.219833	0.230158	0.184404	0.0423528	0.12948	0
EFCAB14	0.4836	0.512132	0.519018	0.415273	0.307859	0.360838	0.640456	0.364582	0.314979	0.552476	0.332371	0.251379	0.49473	0.0959176
CYP4B1	0.00861213	0.000904577	0	0.00237276	0	0	0	0	0.0031855	0.00457561	0	0	0	0
CYP4X1	0.00379363	0.000931974	0.00425966	0.00577342	0.00708253	0.0357963	0	0	0	0	0	0.014264	0	0
LINC00853	0.00412212	0.00267352	0.00469389	0	0.00507319	0.00130815	0.00161806	0	0	0	0	0	0	0
PDZK1IP1	0.0821173	0.0379745	0.0124707	0.0605014	0.0624421	0.0390709	0.00394686	0.0111585	0.0871422	0.0774256	0.0804724	0.0224737	0.182347	0.166726
TAL1	0.00400367	0.000788461	0	0	0.0146304	0	0.00174231	0	0	0	0	0	0.0740609	0
STIL	0.00975562	0.173529	0.0242416	0.0161506	0.0163652	0.0207017	0.0194934	0	0	0.028567	0	0	0	0
CMPK1	1.0496	1.0478	0.648882	1.1262	1.25689	0.707201	0.85631	0.755224	1.62067	1.20013	0.947915	1.01771	2.1291	1.70122
FOXD2-AS1	0.00606784	0.0201608	0.0115859	0.0064392	0	0.0144278	0.00666822	0.00446653	0.00743529	0.005971	0	0	0	0
FOXD2	0.00347202	0.00610209	0.00576869	0.00449656	0.00364548	0	0.00247813	0	0	0.00511497	0	0	0	0
SLC5A9	0.00216743	0.00129281	0.00257814	0	0.00700189	0	0.0104918	0	0	0.0019471	0.0287677	0	0	0
RP5-1024N4.4	0.0035003	0.000990605	0	0	0	0	0.00385315	0	0	0	0	0	0	0
SPATA6	0.129768	0.151683	0.0537591	0.0507617	0.0471409	0.0981114	0.265206	0.024989	0.0223429	0.0758421	0.026189	0.0696745	0	0
AGBL4	0	0.00114163	0	0.00260826	0.00350086	0.00347123	0	0	0	0	0	0.013753	0	0
BEND5	0.00668896	0.0238392	0.0151393	0.0259636	0.00249404	0.0162493	0.00446971	0.0221979	0.00208997	0.0111774	0	0.168067	0	0.143371
ELAVL4	0.109572	0.111707	0.0462889	0.172263	0.104527	0.0745111	0.0665542	0.0218604	0	0.0755001	0	0	0	0
RP5-850O15.4	0.0011943	0	0	0	0	0.00564974	0	0	0.00373217	0	0	0	0	0
FAF1	0.149035	0.322188	0.116339	0.176085	0.183105	0.116226	0.187529	0.117878	0.12918	0.224028	0.115945	0.054754	0.256798	0.202505
CDKN2C	0.241269	0.903526	0.19496	0.163273	0.349207	0.124388	0.13696	0.199962	0.0640651	0.446791	0.114007	0.426633	0.392483	0.440459
RNF11	0.31077	0.244608	0.253969	0.326687	0.307634	0.223369	0.24997	0.33231	0.379734	0.438479	0.58458	0.18767	0.855794	0.694881
RP11-296A18.6	0.00118865	0.000780294	0	0	0.00779228	0	0	0	0	0	0	0	0	0
TTC39A	0.00117383	0.00212865	0.00796474	0.00463499	0	0.0336552	0	0.0133703	0.010264	0	0	0	0	0
EPS15	0.419601	0.334929	0.373246	0.260087	0.298495	0.202223	0.427479	0.294476	0.298908	0.436918	0.427677	0.432952	0.185394	0.27768
OSBPL9	0.252075	0.212271	0.205663	0.222708	0.173258	0.273526	0.152874	0.147517	0.235544	0.229323	0.0903851	0.375927	0.299089	0.0994453
NRD1	0.529739	0.701245	0.549257	0.576594	0.342884	0.634627	0.850738	0.517951	0.330774	0.629089	0.442486	0.608802	0.0730289	1.18742
RP4-657D16.3	0	0	0.00402208	0.0049329	0.00173721	0.00573295	0.00516134	0	0	0.0139427	0	0.0501616	0	0
RAB3B	0.000889977	0	0	0	0.00435191	0.00603599	0.00187927	0.0156337	0	0.00959929	0	0	0	0
TXNDC12	0.805198	1.15628	0.853826	0.614522	0.707264	0.693087	0.865218	0.745266	0.572481	0.792142	0.510295	0.491397	0.515838	0.424987
KTI12	0.0395549	0.0696681	0.0673937	0.0461612	0.0192031	0.0442476	0.0603589	0.0404897	0.0974861	0.0212145	0	0	0.0535699	0.144972
BTF3L4	1.32522	1.09605	0.846291	1.00142	0.833329	1.09819	0.972527	0.789917	0.668939	0.762999	0.822082	0.362261	0.479973	0.293983
ZFYVE9	0.00526829	0.00305269	0.00681007	0.00276874	0	0.0166093	0.00874788	0	0	0	0	0	0.108648	0
CC2D1B	0.0563768	0.0571815	0.0834509	0.037925	0.0516725	0.0768505	0.0388319	0.0818504	0.0458086	0.0980413	0.0167044	0	0	0
ORC1	0.00712539	0.0712836	0.00907208	0.0239462	0.00770141	0.00873082	0.0201968	0.00238548	0	0.00976889	0	0	0	0
PRPF38A	0.383406	0.484225	0.235822	0.431497	0.356593	0.375473	0.428916	0.28303	0.31415	0.447431	0.494633	0.177799	0.324855	0.23761
ZCCHC11	0.384806	0.384805	0.272735	0.41546	0.308886	0.336742	0.378707	0.149744	0.200663	0.477841	0.117114	0.165772	0.39153	0.700347
GPX7	0.0769445	0.111855	0.0599112	0.0550186	0.0781006	0.102518	0.107635	0.032576	0.022039	0.0737817	0.0256573	0.0307899	0.171417	0.518911
FAM159A	0.287694	0.295479	0.0532329	0.240322	0.107012	0.134155	0.0786693	0.0238029	0.00922327	0.143016	0.0533428	0.0137865	0	0
COA7	0.0548054	0.0822803	0.0527067	0.0471784	0.0532826	0.062115	0.0715293	0.0670805	0.0574605	0.0580592	0	0.0303498	0	0.131606
ZYG11B	0.190314	0.11557	0.158049	0.0764819	0.0960602	0.146692	0.152217	0.151166	0.160099	0.097628	0.187168	0.0358386	0	0
ECHDC2	0.157677	0.166404	0.182384	0.122052	0.203077	0.238644	0.135314	0.131303	0.0307501	0.228323	0.0730272	0.195331	0	0
SCP2	1.86852	1.70933	1.50827	1.66053	1.77578	1.66192	1.51118	1.16164	2.06775	1.74438	1.36651	0.945062	1.9972	1.51778
SLC1A7	0	0	0.00561211	0	0	0	0	0	0.00153587	0	0	0	0	0
CPT2	0.102951	0.124879	0.110636	0.0653257	0.0866973	0.127988	0.107506	0.100555	0.0652714	0.0784714	0.0139658	0.141643	0	0
C1orf123	0.270572	0.488953	0.331915	0.254681	0.317884	0.426998	0.341088	0.285297	0.183977	0.285625	0.158366	0.231409	0.336582	0.424577
RP5-1024G6.7	0.00253287	0.00178193	0	0	0.00334213	0.0119311	0.00345126	0.00241479	0.00176667	0.00460658	0	0	0	0
MAGOH	0.768631	1.10646	0.821684	0.775508	0.85965	0.951114	0.668124	0.831135	0.962169	0.875114	0.868648	0.791147	1.22814	1.1069
RP5-1024G6.5	0.00301607	0.00295841	0.00766542	0.00157479	0	0.00911598	0.00215227	0	0	0	0	0	0	0
RP5-1024G6.8	0.00419464	0.0122965	0.00415164	0.00511677	0	0.00474236	0.000974649	0.00294604	0	0.00740952	0	0	0	0
LRP8	0.0127777	0.0418846	0.0122948	0.0051927	0.0125128	0.0212231	0.018712	0.0028983	0	0.0101034	0.0256573	0	0	0.206943
RP4-784A16.5	0	0.000741316	0.000561832	0	0	0	0.00157975	0	0	0	0	0	0	0
RP11-117D22.2	0.00105098	0.0166121	0.00825411	0.0168812	0.0154142	0.0257085	0.0170965	0.00423048	0	0.0109464	0.0276855	0.0357837	0	1.5418
NDC1	0.0629268	0.227498	0.0410829	0.065828	0.0423993	0.02152	0.0421442	0.0592136	0.0943626	0.0547373	0.0495171	0.0523039	0.0740609	0
YIPF1	0.254053	0.175657	0.209961	0.185143	0.110569	0.183178	0.288573	0.136089	0.106679	0.161627	0.113863	0.0612146	0	0.0859254
DIO1	0.00522251	0.00451011	0.00119846	0.00325045	0	0.00707538	0.00231483	0.00567371	0	0	0	0	0	0
HSPB11	0.698306	1.42487	0.615255	0.752207	0.610166	0.881824	0.499553	0.638391	0.629117	0.787658	0.439077	0.760955	0.585679	0.467632
LRRC42	0.094725	0.101828	0.0894406	0.0900475	0.0530088	0.104512	0.117174	0.137902	0.0810811	0.0693917	0.0403287	0.0965176	0.0365145	0
LDLRAD1	0	0.0105628	0.000824766	0.00713042	0.00825763	0	0.00190237	0	0.00220769	0	0	0	0	0
RP4-758J24.5	0.018475	0.00251422	0.0038254	0.00815885	0.00372956	0.0070541	0	0.00421901	0	0.00314241	0	0	0	0
TMEM59	3.19457	2.54794	2.42546	2.17455	2.73202	2.56083	2.55192	2.43594	4.25806	2.67024	2.76108	1.68594	2.12729	2.57935
TCEANC2	0.035167	0.0737139	0.0489792	0.0306049	0.0196791	0.052787	0.0525613	0.0366589	0.0403702	0.0582372	0	0.013753	0.0365145	0.180686
AL161915.1	0	0.00255757	0.00872422	0	0	0	0	0	0	0	0	0	0	0
AL357673.1	0.00318114	0.0121065	0.00457312	0.00180684	0.0073724	0.00626162	0.0030665	0.0148099	0.00481899	0	0	0	0	0
CYB5RL	0.00768726	0.0256415	0.0313407	0.00352402	0.00607809	0.0176082	0.0236495	0.0156121	0.0133832	0.0192814	0	0	0	0
MRPL37	0.358827	0.626649	0.304716	0.397	0.213897	0.381622	0.365711	0.266501	0.341346	0.354423	0.18344	0.284284	0.4862	0.0542597
SSBP3	0.147743	0.18825	0.144971	0.127354	0.0548092	0.0840826	0.0939467	0.102646	0.227193	0.108352	0.185054	0.0678639	0.186349	0
ACOT11	0.102356	0.063532	0.135005	0.0814079	0.0377288	0.180548	0.0798361	0.133871	0.0781766	0.050999	0.0108378	0.0319501	0.120181	0
MROH7	0.00408684	0.00242154	0.0112816	0.00303991	0	0	0.00970147	0.00826945	0	0.0236328	0	0	0	0
TTC4	0.0261806	0.0307353	0.0223345	0.017546	0.00652814	0.0493589	0.0362308	0.0230637	0.0420964	0.0157782	0	0.00841057	0	0
PARS2	0.00617696	0.0038188	0.00957806	0.00447986	0	0.00139731	0.0149178	0.0147083	0.0155096	0.00338625	0.0083636	0	0	0
TTC22	0.000718605	0	0	0	0	0.00680379	0	0.00259817	0.00259091	0.0247798	0	0	0	0
DHCR24	0.0268286	0.100817	0.0211974	0.0535334	0.0260907	0.0254556	0.0281728	0.0145057	0.0656444	0.0334397	0.0132906	0.0134868	0.0535699	0
RP11-67L3.4	0	0	0.00149541	0.00123203	0	0	0	0	0	0	0	0	0	0
TMEM61	0	0	0.00111081	0	0	0.00661282	0	0	0	0	0	0	0	0
PCSK9	0.000562052	0.000548921	0.000808725	0	0	0.00330579	0.00150272	0	0	0	0	0	0	0
USP24	0.107828	0.0993769	0.128752	0.0859288	0.0547223	0.116701	0.0770235	0.0439902	0.0726592	0.115848	0	0.0272397	0	0.293767
RP11-504A18.1	0	0	0	0	0	0	0.012937	0.00600316	0.0025202	0	0	0	0	0
PPAP2B	0.0314859	0.0138519	0.0932605	0.0226937	0.0244524	0.0706233	0.0949388	0.323565	1.87075	0.0842973	0.0816481	0.340305	0	0
PRKAA2	0.0155716	0.0044207	0.00805866	0.00539247	0	0.0224402	0.00511827	0	0.013817	0	0	0.0166414	0	0
C1orf168	0.0278165	0.00645328	0.00336525	0.0015749	0.00279624	0.0564496	0	0.00406067	0.00214284	0.00167123	0	0.0267094	0	0
DAB1	0.0058979	0.00774635	0	0.00683358	0.00927907	0.00624396	0.00479343	0.00430078	0.00334929	0.00173101	0	0.013753	0	0
OMA1	0.131897	0.115264	0.0981653	0.154812	0.0912345	0.143796	0.113966	0.0846397	0.16714	0.171184	0.070633	0.0569707	0.0987128	0
TACSTD2	1.20991	1.56667	0.125632	3.30036	0.515534	0.603691	0.162896	0.129583	0.339073	0.500914	0.308459	2.23277	0.43844	0.505965
MYSM1	0.129009	0.140039	0.140895	0.0973117	0.0924157	0.175467	0.177382	0.131554	0.0865076	0.160387	0.168199	0.114674	0.0820856	0.289242
JUN	8.24088	6.20952	9.28138	4.75225	16.0003	5.29275	7.17394	9.4571	6.10178	11.7335	4.1486	5.15107	5.74372	13.8022
LINC01135	0	0.00477161	0	0	0.00307442	0	0	0.00639808	0	0.00722081	0	0	0	0
RP4-794H19.1	0.0103492	0.00889106	0.0134533	0.00311	0.00260825	0.00260981	0.00368254	0.0256551	0.0228939	0.0181475	0.0493126	0	0	0
RP4-794H19.4	0.00678921	0.00243279	0.00507303	0.00115345	0.00588188	0	0	0.0417387	0.00837656	0.00912874	0	0	0	0
RP11-145M4.1	0	0	0	0	0	0	0	0.00738326	0.00782184	0	0	0	0	0
RP11-145M4.3	0	0.00245405	0.00166759	0	0.00429082	0	0	0.00327341	0	0.00323837	0	0	0	0
FGGY	0.0759706	0.115613	0.0951161	0.079826	0.0626653	0.155228	0.088635	0.109744	0.135259	0.0788146	0.0558076	0.18249	0	0.090712
RP4-782L23.1	0.00102351	0	0.000884744	0	0	0	0	0	0.0111777	0	0	0	0	0
HOOK1	0.0120088	0.0195773	0.0074479	0.00912929	0.00830608	0.0422381	0.00778184	0.00337953	0.00824868	0.0277081	0.0108378	0	0	0.0814047
CYP2J2	0.000894641	0	0	0.00241931	0	0	0	0	0.00783749	0.0110967	0	0	0	0
C1orf87	0.00411636	0	0	0.00210836	0.00489905	0	0.00147808	0	0.0101662	0.0033918	0	0	0	0
NFIA	0.056175	0.0573852	0.106981	0.030568	0.0412496	0.206302	0.068413	0.0484267	0.065934	0.0946924	0.027565	0	0.585552	0.0822206
TM2D1	0.460784	0.447648	0.325701	0.331884	0.351007	0.34259	0.389662	0.355397	0.756052	0.371531	0.596736	0.266184	0.634469	0.429466
RP11-430G17.3	0.000765887	0.000997478	0.000840765	0.00152572	0.00275323	0.0149503	0	0.00123667	0	0	0	0	0	0
INADL	0.0128984	0.00430441	0.0183284	0.00831962	0.00457348	0.0618564	0.0104274	0.0226737	0.00568794	0.0625573	0.0108378	0.125289	0	0
L1TD1	0.00304063	0.00123475	0.00452434	0	0.00407324	0.015312	0	0.0031131	0	0.0168618	0	0	0	0
USP1	0.224789	1.0752	0.233604	0.296185	0.152923	0.256134	0.31574	0.295649	0.271453	0.349064	0.19521	0.350335	0.157328	0.272477
DOCK7	0.126794	0.114051	0.151315	0.112369	0.0799769	0.135385	0.175134	0.172038	0.11639	0.130454	0	0.0633817	0	0
ATG4C	0.352285	0.324325	0.278078	0.235079	0.230015	0.358077	0.247865	0.131615	0.25008	0.150078	0.0481167	0.107023	0	0.108519
FOXD3	0	0	0	0	0	0	0	0.00597275	0.00483563	0	0	0.014264	0	0
ALG6	0.0797794	0.14253	0.0633498	0.086117	0.0838848	0.0590331	0.0679714	0.0215187	0.0850331	0.0837098	0.0989449	0.0120584	0.106285	0.0810708
ITGB3BP	0.128395	0.78226	0.112648	0.18008	0.146794	0.17671	0.130064	0.182478	0.199199	0.210081	0.0684276	0.184748	0.278955	0.340759
EFCAB7	0.0198131	0.0263231	0.0123194	0.0231532	0.0267825	0.0395583	0.0128865	0.00943256	0.0113682	0.0177084	0	0.0163111	0	0
DLEU2L	0.0341278	0.0951969	0.0217503	0.0154477	0.0137651	0.020014	0.0249503	0.0212572	0.016907	0.0127794	0	0.0459956	0.152283	0.129518
PGM1	0.306119	0.34594	0.19917	0.269284	0.145397	0.197726	0.203564	0.345254	0.0575695	0.224966	0.0267651	0.0787363	0.375661	0.243695
ROR1	0	0	0.00953293	0.00367357	0	0.00404992	0	0.007579	0	0	0	0.0355106	0	0
CACHD1	0.00322357	0.00467367	0	0.00562135	0.00677321	0.00260292	0.00481488	0.00365693	0.00408605	0	0	0	0	0
RAVER2	0.000906485	0.0202446	0.00096797	0.00804851	0.00776485	0.0104142	0	0.00608643	0.0031855	0	0	0.060914	0	0
JAK1	0.800258	0.687404	0.699293	0.779093	0.792618	0.764317	1.11437	0.78436	1.07633	1.47773	1.14511	1.75743	0.659294	1.18416
RP11-182I10.3	0	0	0.00171533	0.00240235	0	0	0.00187927	0	0	0	0	0	0	0
RP4-535B20.1	0	0	0.00096797	0.00118705	0	0	0	0	0	0.00717611	0	0	0	0
AK4	0.146939	0.132165	0.0945631	0.103346	0.0104693	0.0952696	0.0740905	0.644276	0.457202	0.0784311	0.0354185	0	0	0
DNAJC6	0	0	0.00185501	0.0018553	0	0	0.00182229	0.00152228	0	0	0	0	0	0
LEPR	0.0234777	0.0177305	0.0384009	0.0360853	0.0455642	0.0198712	0.0322228	0.0766726	0.0405853	0.0297171	0	0	0.104743	0
LEPROT	0.732739	0.582437	0.728482	0.543908	0.663702	0.798521	1.16128	0.661316	1.42235	0.677507	0.558291	0.215095	0.457645	0.777143
PDE4B	0.722835	0.383589	0.37529	0.427806	0.700124	0.140222	0.582089	0.234351	0.155766	0.693946	1.4437	0.805949	0.173106	1.17388
SGIP1	0	0.00257647	0.00213275	0	0.00355801	0.00497435	0.00361582	0.00291442	0.00834442	0	0.0108378	0	0	0
TCTEX1D1	0.0705603	0.072223	0.0672642	0.0170114	0.0758923	0.0469946	0.106225	0.0415303	0	0.0595211	0	0	0.186939	0
WDR78	0.0163538	0.0134469	0.00313366	0.00987524	0.0305192	0.0100964	0.013388	0.00209098	0.0365977	0.0190946	0	0	0	0
MIER1	0.326101	0.410256	0.333005	0.344255	0.245117	0.349	0.44544	0.385193	0.294025	0.510094	0.306814	0.275524	1.2795	0.0408938
SLC35D1	0.0367369	0.0285487	0.0518128	0.0400004	0.0406394	0.0250686	0.0215936	0.0207965	0.0363436	0.0526981	0.0284093	0.0260425	0.0987128	0.0814047
IL23R	0	0.00301379	0.00235449	0	0	0	0	0.00131159	0.00179759	0	0	0	0	0
IL12RB2	0	0.000843896	0.000782363	0	0.00713375	0	0	0	0	0.0101034	0	0.0160537	0	0
SERBP1	2.14667	2.9234	1.67659	2.61041	1.87193	2.32773	2.53411	1.58189	1.9162	2.56216	1.59225	1.73427	3.0697	1.35801
GADD45A	0.123644	0.122055	0.164621	0.115314	0.285002	0.0746285	0.223216	0.361102	0.340931	0.364121	0.381747	1.20866	0.408655	0.302541
GNG12	0.0233362	0.0305872	0.0554084	0.0177328	0.0328346	0.0452704	0.0540278	0.0226879	0.0696413	0.0233474	0	0.0369965	0	0
DIRAS3	0.00083594	0	0.00096797	0	0	0.00381397	0	0	0	0	0	0	0	0
WLS	0.0430179	0.0278602	0.0950912	0.00885956	0.0864872	0.0376255	0.0645808	0.0706207	0.0655967	0.0645871	0.0864218	0	0	0
DEPDC1	0.012234	0.539096	0.0123797	0.0129283	0.00532713	0.00318526	0	0.0363031	0	0.0242749	0	0.00811528	0	0
RP4-694A7.4	0.00201038	0.00801921	0.000763776	0.00556713	0	0	0	0	0	0	0	0	0	0
LRRC7	0.0127132	0.010539	0.00719943	0	0.00332749	0.0124319	0.00597544	0	0.00648307	0.0033918	0	0	0	0
LRRC40	0.0835624	0.16826	0.0902214	0.0802861	0.0866104	0.0824388	0.0754704	0.0573048	0.050327	0.115522	0.0708371	0.0451486	0	0.0951534
SRSF11	1.15487	1.4652	1.01592	1.10432	0.822257	1.35599	1.11279	0.817614	0.738016	1.41624	0.955741	1.2712	0.874958	1.19559
ANKRD13C	0.0788213	0.112929	0.0678157	0.0847333	0.0446004	0.0958518	0.127058	0.0614735	0.127647	0.0972946	0.0548702	0.11095	0	0.0542597
HHLA3	0.057768	0.0787687	0.0851761	0.0907465	0.0992887	0.0968561	0.078381	0.0802594	0.154883	0.0520983	0.0523951	0.0691912	0.156338	0.0817875
CTH	0.00904123	0.00337763	0.00728016	0.00852648	0.0192167	0.00655732	0.00242738	0	0.0296287	0.0276387	0.101167	0	0.0978091	0
PTGER3	0	0	0	0.00152055	0	0.00376439	0	0	0	0	0	0	0.0365145	0
ZRANB2	0.442295	0.586625	0.487849	0.421192	0.350245	0.682428	0.456332	0.418717	0.424156	0.597463	0.415463	0.456417	1.21434	0.784857
NEGR1	0	0.00311999	0.0023505	0.00748933	0.0050498	0	0.00319614	0	0	0	0	0.0681661	0	0.151685
LRRIQ3	0.010807	0.0186304	0	0.00362886	0.00591287	0.00768088	0.00924626	0.00926017	0	0.0188365	0	0	0	0
FPGT	0.1117	0.092566	0.0557421	0.082658	0.0870515	0.0968853	0.0867366	0.058131	0.127892	0.0828441	0.122909	0.108153	0.06977	0
FPGT-TNNI3K	0	0	0.00301889	0	0.00793122	0	0.00549518	0	0	0	0	0	0	0
TNNI3K	0	0.000832297	0.00576416	0	0.00432861	0	0	0.006167	0	0	0	0	0	0
C1orf173	0.0149116	0.0164813	0	0.00406878	0.00486727	0.0215375	0	0.00209098	0.0228951	0	0	0	0	0
RP11-17E13.2	0.002707	0	0	0.00638233	0	0	0.00183046	0	0	0.00150202	0	0	0.120181	0
CRYZ	0.12944	0.165063	0.10447	0.136597	0.151229	0.213694	0.128262	0.117706	0.233357	0.103409	0.0360491	0.0820255	0.0836344	0.0477102
TYW3	0.181171	0.255394	0.183289	0.252521	0.141257	0.240868	0.232056	0.159535	0.162871	0.229873	0.283637	0.0324981	0.0987128	0
ACADM	0.468745	0.510707	0.347607	0.416752	0.27175	0.489699	0.40158	0.259172	0.288272	0.427829	0.139193	0.332162	0.427171	0.513224
RABGGTB	0.644723	0.518676	0.388378	0.727283	0.97445	0.525364	0.459566	0.427231	0.667292	0.618257	0.490314	0.439028	0.80796	0.363404
MSH4	0	0	0.00862631	0.00402125	0	0.00142673	0	0.00218809	0	0	0	0	0	0
ST6GALNAC3	0	0.000712889	0.0145043	0	0	0	0	0.00131159	0.00444528	0.0140338	0.105071	0	0	0
ST6GALNAC5	0.000765887	0.00160017	0	0	0	0	0	0	0	0.00280676	0	0	0	0
PIGK	0.135778	0.213774	0.122085	0.149455	0.192852	0.156834	0.111193	0.0935607	0.206366	0.164582	0.0799742	0.0888986	0.240582	0.162526
AK5	0	0.00399158	0.00502425	0	0	0	0.00538788	0.0235053	0.0665158	0.00419208	0	0	0	0
ZZZ3	0.099154	0.125844	0.0806528	0.0790687	0.0685929	0.107247	0.0897136	0.120344	0.255595	0.108477	0.0132906	0.056212	0	0.0999426
USP33	0.288378	0.292206	0.209281	0.215626	0.156563	0.245081	0.274373	0.163393	0.283434	0.295598	0.144557	0.127694	0.145408	0.278375
FAM73A	0.111144	0.0787112	0.0863991	0.0694275	0.0671537	0.124413	0.119863	0.0785962	0.0241927	0.102451	0	0.0798988	0	0.0615839
NEXN	0.00228885	0.0374165	0.0202908	0.0109487	0	0.0400825	0.0226423	0.00571041	0	0.00983849	0.0311156	0	0	0.102883
FUBP1	0.335117	0.567508	0.30087	0.421114	0.262496	0.377743	0.360838	0.273948	0.287682	0.454649	0.346863	0.214004	0.307641	0.302208
DNAJB4	0.341121	0.332196	0.492826	0.365635	1.84985	0.23532	0.405378	0.454495	0.583382	0.875178	0.240206	0.552031	0.222183	1.4771
GIPC2	0.0176149	0.00402311	0.00971633	0.00284859	0.00484396	0	0.00469592	0.00920611	0	0.0112955	0	0.0224737	0	0
RP11-386I14.4	0.329237	0.311724	0.158403	0.453516	0.604524	0.0920649	0.299916	0.141768	0.116529	0.296512	0.58285	0.0954079	0.108648	0.593835
IFI44L	0.52883	0.37313	0.461616	0.0819506	0.141926	0.52542	0.49026	0.157897	0.0795647	0.245511	0.283579	0.0134868	0.13954	1.76504
IFI44	0.519964	0.463813	0.414517	0.148193	0.235717	0.495471	0.575582	0.204666	0.0971796	0.389591	0.401702	0	0.0730289	0.154618
ELTD1	0.00160553	0.000959857	0.00893608	0	0.00502963	0	0.00818403	0.0132887	0.00590265	0.00173118	0	0	0	0
RP5-887A10.1	0	0.00132259	0.0176331	0	0	0.00411938	0.00768843	0.00124895	0	0	0	0	0	0
LPHN2	0.00841324	0.00981078	0.00591479	0.00647051	0	0.0134511	0.0234033	0.0158068	0	0	0.0216757	0	0.105565	0
TTLL7	0.0174842	0.0187702	0.0074176	0.0163254	0.0156721	0.033626	0.00771396	0.0272174	0.012615	0.0106197	0	0.0664318	0.0535699	0
RP11-486G15.2	0.00248354	0.00126783	0.00958136	0.000487382	0.00636593	0.011596	0.00281571	0	0.0279906	0	0	0	0	0.163839
PRKACB	0.36008	0.292541	0.249101	0.305761	0.281643	0.308088	0.312974	0.137829	0.186163	0.486226	0.115926	0.153675	0.110575	0.343189
SAMD13	0	0.00579851	0.00314025	0.00528041	0.00660039	0.0147948	0.00153831	0	0.0140604	0.00229298	0	0	0	0
DNASE2B	0	0.00143649	0.0108112	0	0.00849901	0.00375281	0.003825	0	0.333062	0.00543347	0	0	0	0
RPF1	0.3249	0.357022	0.260817	0.377501	0.307972	0.339737	0.250731	0.298159	0.463367	0.281853	0.315757	0.108688	0.516585	0.537576
GNG5	3.05367	4.21266	3.69478	3.48581	3.17839	3.49397	3.91034	3.47955	3.03855	3.01609	3.07488	3.51086	1.69879	2.29136
CTBS	0.404378	0.338771	0.466608	0.26318	0.40779	0.380993	0.581299	0.591897	0.77074	0.369155	0.248757	0.142995	0.0740609	0.666774
SSX2IP	0.0175757	0.0565296	0.0401138	0.0338185	0.0226889	0.0288475	0.0264907	0.0125391	0.030019	0.0415744	0.0285417	0.0267483	0.0978091	0.221704
LPAR3	0.00526282	0.0140596	0.0116635	0.0114645	0.00867979	0.0122795	0.0187289	0.00376042	0.0025202	0	0.0167044	0	0	0
MCOLN2	0.0981093	0.119098	0.0883261	0.203018	0.125464	0.106687	0.0897507	0.0308224	0.00685539	0.105773	0	0.40991	0	0.314364
WDR63	0.00442374	0	0	0.00604708	0.00624507	0	0.00193164	0.00542572	0.0140157	0.00349883	0	0	0	0
MCOLN3	0.00415472	0.00481971	0.0154066	0.00847658	0.00402603	0.00862756	0.0209464	0.0584528	0.0811061	0.0288191	0.0184015	0	0	0
SYDE2	0	0	0.000932949	0	0	0	0	0.0148729	0.0058381	0.00869115	0	0	0	0
C1orf52	0.224894	0.295092	0.22271	0.19773	0.377796	0.201946	0.230202	0.306925	0.549844	0.27299	0.324334	0.198161	0.180489	0.288195
BCL10	0.274488	0.349457	0.255979	0.310137	0.289691	0.315103	0.331719	0.332576	0.349158	0.310392	0.569994	0.213533	0.141257	0.132713
RP11-131L23.1	0.00296456	0.005303	0.00245698	0.0140266	0.0317824	0	0.00211481	0.00973919	0.00317563	0.0174186	0	0	0	0
DDAH1	0.048175	0.0243296	0.0209758	0.0276861	0.0201041	0.149951	0.00765735	0.00615757	0.0217207	0.0517494	0.0343411	0	0	0
CYR61	0.0705399	0.0575194	0.059644	0.065215	0.238306	0.0753485	0.0781192	0.083454	0.158407	0.178088	0.153443	0.0228207	0	0
ZNHIT6	0.0822129	0.119294	0.0950592	0.0720994	0.0338677	0.159492	0.0866915	0.0353752	0.080898	0.112544	0	0.0937902	0	0.179316
COL24A1	0.00723605	0.00248438	0.00264904	0.00206613	0	0.00644409	0.00523083	0.00158454	0	0	0	0	0	0.259959
ODF2L	0.162296	0.193043	0.170466	0.195552	0.142511	0.288632	0.196852	0.13242	0.116168	0.444697	0.153056	0.14092	0.0535699	0.640825
CLCA4	0	0.00171548	0	0	0	0	0.00281571	0	0	0	0	0	0	0
RP4-612B15.3	0.00764356	0.00461458	0.00850761	0.0052661	0.0026307	0.00386509	0.00334909	0	0.0309071	0.0136471	0	0	0	0
SH3GLB1	1.27057	1.08766	1.10054	0.985395	0.883013	0.968929	1.61391	1.53024	1.42835	1.19466	0.597694	0.479597	1.0103	0.440609
2019-09-15	1.87772	1.63135	1.59136	1.8497	1.94775	1.50097	1.81808	1.22099	3.51772	1.55074	1.83654	1.34558	1.51799	2.47069
HS2ST1	0.0927016	0.0950363	0.103697	0.0780499	0.0640318	0.12326	0.114853	0.130375	0.221628	0.100914	0.0192014	0.013753	0.137204	0
LMO4	0.539828	0.820246	0.466954	0.68243	0.396211	0.661828	0.637739	0.391058	0.760073	0.637398	0.413371	0.200408	1.37934	0.45187
PKN2	0.347753	0.381493	0.337465	0.324364	0.250923	0.411627	0.388457	0.323009	0.136306	0.315426	0.185168	0.190737	0	0.521111
GTF2B	0.272768	0.281239	0.328022	0.362985	0.47956	0.409102	0.270415	0.284349	0.465533	0.368544	0.667589	0.230563	0.268295	0.483204
CCBL2	0.114616	0.126846	0.12288	0.151816	0.143359	0.0951793	0.124408	0.12703	0.137667	0.115631	0.0822848	0.0525353	0.127631	0.19592
RBMXL1	0.11217	0.141331	0.101291	0.0894603	0.134284	0.0974241	0.114652	0.0819956	0.109512	0.156464	0.28668	0.0829896	0.0365145	0.0845059
GBP3	0.14304	0.156816	0.179106	0.120367	0.218354	0.130368	0.271992	0.100152	0.0915046	0.259151	0.33028	0.150413	0	0.0408938
GBP1	0.440661	0.679704	1.2136	0.50578	0.487785	1.08861	0.962755	0.303815	0.0863275	0.731148	0.688305	0.369672	0	0.143752
GBP2	0.805579	0.481172	1.25513	0.399479	1.1658	0.767853	0.870347	0.930977	0.0813463	0.925396	1.16125	0.0761515	0.196522	0
GBP7	0.0163561	0.0237956	0.0766072	0.00818998	0.047303	0.0225228	0.00185075	0.017687	0	0.0818239	0	0.0390631	0	0
GBP4	0.282024	0.325304	0.767224	0.191972	0.283123	0.4353	0.351972	0.121617	0.0308743	0.526012	0.325017	0.216086	0.174513	0
GBP5	0.0927089	0.0947074	0.58537	0.0390097	0.0447197	0.192795	0.19846	0.148109	0.01372	0.353639	0.112925	0.0940648	0	0
GBP6	0.00456725	0	0	0	0	0	0.00137401	0	0	0	0	0	0	0
LRRC8B	0.0486577	0.0951845	0.0743827	0.0385883	0.0485051	0.0879136	0.0508273	0.0227149	0.160864	0.0530056	0.146254	0.0228207	0	0.244127
RP5-1007M22.2	0.0275461	0.0391717	0.0457825	0.0553244	0.060059	0.0354161	0.0354967	0.0178777	0.00779769	0.046031	0.0128912	0	0	0
LRRC8C	0.257503	0.274003	0.194893	0.243551	0.213639	0.21423	0.245047	0.0788189	0.0225776	0.247671	0.0513585	0.13452	0	0.0816187
RP5-943J3.2	0.00239409	0.00868611	0.00436668	0	0	0.00386656	0	0.0061419	0	0.00393266	0.026189	0	0	0
LRRC8D	0.108856	0.166774	0.114686	0.162667	0.0856812	0.169678	0.1159	0.0957233	0.0723924	0.113896	0.0379067	0.0474057	0.0832667	0.0542597
ZNF326	0.195073	0.377005	0.185255	0.284741	0.23123	0.243946	0.271501	0.165856	0.14872	0.247442	0.16059	0.168131	0.324962	0.481853
RP4-665J23.1	0	0	0.00337994	0	0.00711336	0	0.00629144	0.00724589	0	0.00427372	0	0	0	0
ZNF644	0.343814	0.362957	0.205916	0.291074	0.254116	0.351359	0.387922	0.215899	0.234207	0.355871	0.0967944	0.179632	0.448065	0.39302
CDC7	0.0128744	0.0740093	0.0107576	0.0126168	0.0132081	0.0197392	0.0164021	0.00909756	0	0.0529418	0	0.0137865	0	0
TGFBR3	0.0018049	0.000587631	0	0.0038549	0.00806562	0	0.0230819	0.009306	0.0145078	0.0576407	0	0	0	0
EPHX4	0	0	0.00573732	0	0	0.00392228	0.00408399	0.00567371	0	0.00224257	0	0	0	0
BTBD8	0.0082974	0.00924753	0.0289196	0.0110236	0	0.0207509	0.0208162	0.0178661	0.00853753	0.0174623	0	0	0	0.0615839
KIAA1107	0.0151953	0.0117841	0.0187931	0.00902313	0.00388629	0.00392025	0.00856032	0.0116545	0.0182678	0.0119083	0	0	0	0
GLMN	0.0459665	0.106162	0.0611822	0.0772526	0.0627998	0.0565248	0.05141	0.0541288	0.0857237	0.220436	0	0.0679166	0.337019	0
RPAP2	0.0909372	0.129772	0.142601	0.103853	0.079183	0.166927	0.16012	0.108082	0.0424668	0.215163	0	0.0477922	0.0749131	0.188215
GFI1	0.00625909	0.00389075	0.015316	0.0057396	0.00916067	0.00436794	0.0134303	0.0129533	0.031464	0.110863	0.0255558	0.00811528	0.254379	0
EVI5	0.268456	0.23303	0.219672	0.25941	0.233782	0.264739	0.324414	0.119171	0.231098	0.204153	0.242932	0	0.0365145	0.296645
RPL5	10.42	9.20029	8.1728	14.2878	9.43879	10.2482	10.9964	9.25755	8.2091	10.5693	9.41376	13.5473	15.3265	11.981
FAM69A	0.0604954	0.0368894	0.0305678	0.0179946	0.0187834	0.044125	0.045132	0.00490752	0.0210802	0.0200484	0.0128912	0.0295995	0	0.0810708
MTF2	0.335058	0.526392	0.273999	0.406869	0.294681	0.36543	0.400277	0.239498	0.292553	0.516063	0.198348	0.455139	0.159854	0.725695
TMED5	0.430434	0.484578	0.633417	0.391707	0.683394	0.531109	0.945601	0.527221	0.486288	0.548203	0.650134	0.455992	0.949148	0.20241
CCDC18	0.0498591	0.306165	0.0830946	0.0727475	0.0631409	0.120943	0.110763	0.0475212	0.0249129	0.132266	0.0741458	0.0966348	0	0.0482074
DR1	0.420279	0.522259	0.3371	0.460482	0.394714	0.366001	0.414125	0.244602	0.331898	0.496575	0.340576	0.234728	1.01186	0.804052
FNBP1L	0.0664022	0.071452	0.0332953	0.0672256	0.0640493	0.144169	0.0455404	0.106657	0.0431568	0.0309195	0.030693	0.0835954	0.0535699	0
BCAR3	0.0176207	0.0141869	0.0393825	0.0289731	0.0337346	0.0362269	0.0142993	0.0873712	0.0652168	0.00465323	0.0312578	0.0599728	0.0730289	0.0542597
RP5-1033H22.2	0.00124336	0	0.00430925	0.0012654	0	0.00388824	0	0	0	0	0	0	0	0
RP4-561L24.3	0	0.000846971	0.0014482	0	0.00389232	0.00646065	0.00239057	0.00209098	0	0.00185257	0	0	0	0
DNTTIP2	0.430538	0.476125	0.429054	0.38774	0.64955	0.301886	0.593435	0.478895	0.2943	0.496234	0.523415	0.544189	0.542201	0.25422
GCLM	0.117457	0.130077	0.112581	0.0992625	0.0775152	0.123114	0.142987	0.317911	0.228923	0.126566	0.0432859	0.066716	0.0885395	0.253735
ABCA4	0.0032163	0	0	0	0.00425295	0.00467174	0.0038234	0	0	0	0	0	0	0
ARHGAP29	0.00144761	0.00205103	0.0157894	0.0108241	0.0137415	0.0308214	0.00853735	0.0304276	0.0229181	0.00697672	0.106386	0.0224737	0.824335	0
ABCD3	0.0898314	0.10836	0.0689136	0.0852979	0.0808515	0.0903282	0.0949634	0.0543653	0.0951945	0.0784628	0.0273082	0.130046	0.380701	0
F3	0.0469839	0.0271292	0.00875872	0.0374133	0.043283	0.0501933	0.0235693	0.0495592	0.0287411	0.040159	0.360017	0.0682467	0.0885395	0
LINC01057	0.00337376	0	0	0.00453976	0	0.00179414	0.0040301	0.00209098	0	0	0	0	0	0
SLC44A3	0.0141329	0.0020399	0.00527785	0.00557157	0.0066634	0.0201294	0.0045527	0.00579784	0	0.0123337	0	0.0184627	0	0
CNN3	0.0950067	0.0740356	0.0854699	0.0602678	0.093939	0.104858	0.0885144	0.0574416	0.0359625	0.10243	0.118509	0.144521	0.209621	0.0845059
RP4-639F20.1	0	0	0.00273986	0	0	0.00159965	0	0	0	0	0	0	0	0
ALG14	0.0514518	0.101934	0.0816979	0.0853638	0.0612499	0.104219	0.0963711	0.0539927	0.168946	0.0502202	0.0789837	0.306166	0	0.13815
TMEM56	0.00296738	0	0.00238367	0.00131235	0.0094308	0.00880137	0	0	0.00214284	0	0	0	0	0
RWDD3	0.0123671	0.00304039	0.0024701	0.00704195	0.00392094	0.0193948	0.0119188	0.00241479	0.0269971	0.0058545	0	0	0	0.0729868
PTBP2	0.0610085	0.0774302	0.0433741	0.0437317	0.0493362	0.0349812	0.0444941	0.062779	0.0171778	0.0788987	0.0389473	0.0656102	0	0
DPYD	0.423277	0.300881	0.399847	0.280563	0.198293	0.317969	0.475858	0.253413	0.114469	0.36306	0.531814	0.0368671	0.158313	0.0408938
SNX7	0.269249	0.342929	0.142418	0.258053	0.295631	0.260317	0.219503	0.0666346	0.0744226	0.111001	0	0.0619729	0.06977	0
PALMD	0.00705291	0.005997	0.000627889	0.00935679	0.01023	0.0724079	0.00990173	0.00337953	0.00623276	0.00742902	0.0083636	0	0	0
FRRS1	0.0201294	0.024318	0.0542508	0.0193531	0.00686385	0.00278988	0.0122212	0.142954	0.0081952	0.0166706	0	0.0218973	0	0
AGL	0.108056	0.0899123	0.11986	0.068879	0.0389085	0.0612192	0.0706005	0.119077	0.0667838	0.0803752	0	0.0535223	0	0.0859254
RP5-884G6.2	0	0	0.001947	0	0	0.00442109	0	0.0078433	0	0	0	0.0316608	0	0
SLC35A3	0.151781	0.162254	0.109495	0.100827	0.116404	0.157332	0.128126	0.121422	0.233533	0.11518	0.122983	0.1375	0.266496	0.102858
HIAT1	0.154	0.181942	0.146028	0.157362	0.207855	0.158838	0.230504	0.197492	0.422609	0.352717	0.153058	0.182315	0.0987128	0.0845059
SASS6	0.0586425	0.279196	0.0626547	0.0505978	0.0576158	0.0718038	0.0775683	0.0370238	0.0222041	0.0701305	0.026189	0.0268983	0	0
TRMT13	0.150283	0.120382	0.165184	0.134884	0.074588	0.195206	0.12327	0.0710155	0.0726434	0.0918467	0.0644331	0.100172	0	0.391609
LRRC39	0.0056709	0.0044155	0.0826339	0	0	0.0316879	0.0159555	0.0166854	0.0150267	0	0	0	0	0
DBT	0.0633338	0.0868356	0.0690519	0.0660653	0.049574	0.109093	0.09033	0.0500704	0.0769194	0.10322	0.0285417	0	0	0
RP11-305E17.6	0.00618112	0.00461153	0.00984248	0.00281594	0.0127206	0.00988114	0.00669716	0.0227656	0.0130807	0.00304023	0	0	0	0
RTCA	0.298288	0.38242	0.359535	0.262233	0.2362	0.28884	0.350629	0.354689	0.254999	0.305376	0.204408	0.217598	0.0885395	0.295088
CDC14A	0.0714472	0.0740225	0.0436475	0.0384766	0.0537191	0.024993	0.0377615	0.0222341	0.0463815	0.0792081	0.0856781	0	0.194105	0.0477102
VCAM1	0.00342115	0.014249	0.144057	0.0319035	0.0110156	0.0211148	0.00793205	0.0125233	0.00402653	0.0412356	0	0.211028	0	0
EXTL2	0.0704028	0.0774127	0.0304972	0.0298476	0.0373584	0.0821449	0.047283	0.0299148	0.0444852	0.0641323	0.0720737	0	0.0968542	0
RP4-549L20.3	0.00335456	0.00653199	0.0136612	0.00386092	0.0228647	0.00722065	0.00710693	0.015655	0.00601701	0.0209204	0.0268543	0	0	0
SLC30A7	0.285367	0.221194	0.195108	0.193929	0.153698	0.30204	0.250405	0.161904	0.237699	0.291024	0.395031	0.11404	0.544861	0.381386
DPH5	0.178539	0.153665	0.13256	0.192696	0.112774	0.205585	0.141948	0.0952272	0.156701	0.139458	0.230908	0.0361248	0.153404	0
AC093157.1	0	0.000524725	0.000808725	0	0.00242268	0	0.00397331	0.00758357	0	0	0	0	0	0
RP11-421L21.2	0.0020864	0.00453896	0.00511734	0.0071093	0.00302616	0.0025255	0	0	0.0044694	0.00417386	0.028182	0.025827	0	0
RP11-421L21.3	0.0393435	0.0381192	0.0345249	0.0269118	0.0293075	0.0408065	0.0220812	0.0119393	0.0221329	0.0224883	0	0	0	0
RP4-575N6.4	0	0.00358813	0.00151393	0	0	0.00336213	0.00211481	0.0183963	0	0	0	0.025827	0	0
S1PR1	0.0127348	0.0142109	0.0797418	0	0.00652581	0.0448123	0.0277501	0.0372794	0.00379487	0.0142197	0	0.0459956	0	0
COL11A1	0	0	0	0	0	0	0.00207876	0	0.00797561	0	0	0	0	0
RNPC3	0.0832375	0.125553	0.183941	0.0565801	0.0442348	0.181606	0.0993456	0.134749	0.0940344	0.11158	0.0999126	0.0986423	0.0749131	0.132806
AMY2B	0.00982694	0.00645534	0.0212341	0.0132346	0.0101795	0.017019	0.0137767	0.00537272	0.02912	0.0284576	0.0563714	0.0183377	0	0.102374
RP11-364B6.1	0	0	0.00583307	0	0	0	0.00206899	0.00219101	0	0	0	0.0120584	0	0
PRMT6	0.0479365	0.0527914	0.0576502	0.0360427	0.0143114	0.0532106	0.0395648	0.0255152	0.0388404	0.0451166	0.0303844	0.0247121	0.105565	0
VAV3	0.173663	0.12858	0.205452	0.131363	0.0423695	0.15808	0.262734	0.169872	0.0946478	0.280599	0.0638866	0.419107	0.0987128	0.143371
VAV3-AS1	0.00331851	0	0	0	0.00229197	0	0.00461373	0	0	0	0	0	0	0
RP11-356N1.2	0	0.00458392	0.027683	0.00173916	0.000971496	0.00242428	0.0213007	0.0347055	0.0200098	0.00429307	0.0103185	0	0	0
SLC25A24	0.458958	0.475674	0.547122	0.274273	0.303332	0.365349	0.521976	0.482024	0.42469	0.26849	0.348583	0.445673	0.137016	0.169675
RP11-483I13.5	0.00292376	0.0043007	0.00561564	0.00352897	0.00763299	0.00660452	0.00340902	0.00226655	0.0113739	0.0083478	0	0	0	0
FAM102B	0.184279	0.174011	0.126198	0.178306	0.139771	0.140384	0.106744	0.103572	0.0587046	0.197499	0.276852	0.136806	0.12948	0.0517352
HENMT1	0.0933412	0.138383	0.0864618	0.130889	0.0603134	0.107513	0.0505415	0.0348101	0.102999	0.188836	0.075213	0.0252653	0	0.0477102
PRPF38B	1.48539	1.39491	1.11654	1.39997	1.17874	1.28301	0.970586	0.700888	0.695537	1.66689	0.634601	1.02408	1.42424	1.36084
STXBP3	0.383698	0.333404	0.270203	0.322432	0.278949	0.339064	0.324404	0.268924	0.327396	0.254723	0.225636	0.399096	0.17691	0.225181
GPSM2	0.0358172	0.358236	0.0327635	0.0190025	0.0414981	0.0304802	0.0346234	0.0165843	0.0225312	0.0565099	0	0.0561367	0	0
CLCC1	0.0743144	0.0961264	0.11531	0.0785345	0.0750033	0.0788835	0.112839	0.0562709	0.0196767	0.058931	0.0108378	0.0462141	0.0885395	0.0542597
WDR47	0.0696329	0.055819	0.0656721	0.0560884	0.0588777	0.0498228	0.0748346	0.100134	0.055287	0.0686235	0.02872	0.0962141	0.1892	0
TAF13	0.143929	0.146444	0.109554	0.134944	0.132505	0.112672	0.155721	0.0845897	0.176421	0.146764	0.478156	0.0986177	0.392396	0
RP5-1065J22.8	0.0341804	0.0211956	0.0472235	0.0415029	0.0239554	0.0239506	0.0267507	0.0350429	0.0309947	0.0455034	0	0.048454	0	0.0814047
TMEM167B	0.340308	0.269161	0.268297	0.300036	0.247772	0.272284	0.312586	0.469708	0.292121	0.32883	0.525189	0.16104	0.200335	0.210558
SCARNA2	0.00514224	0.00313306	0.00160102	0.0111293	0	0.00655088	0.011792	0.0105083	0	0.00252316	0	0	0	0
C1orf194	0.191497	0.145931	0.0126857	0.161656	0.408393	0.0118107	0.0387212	0.00338135	0.403933	0.144158	0.314056	0.268565	0.298198	0
KIAA1324	0.0290013	0.043281	0.024647	0.0203498	0.0242955	0.434431	0.0382271	0.0214175	0.0342071	0.0251192	0.0287677	0.051824	0	0.0867483
SARS	0.530981	0.501103	0.517073	0.590802	0.583165	0.497878	0.498026	0.478279	0.578104	0.522765	0.39846	0.399032	1.12102	0.264412
CELSR2	0.0137815	0.0105489	0.00821403	0.00338071	0.0163031	0.0260267	0.00449534	0.00903712	0.00219822	0	0	0.0101188	0	0.0859254
PSRC1	0.0272527	0.151391	0.0332687	0.0153514	0.00552606	0.0165417	0.0408538	0.00800628	0	0.0249915	0	0	0	0
SORT1	0.351143	0.401861	0.208047	0.283836	0.299316	0.226325	0.341201	0.160301	0.196191	0.190234	0.188836	0.0704134	0	0.246451
PSMA5	0.89781	1.28247	1.08	1.18538	0.841134	1.17726	1.14064	0.788145	0.772804	1.22917	0.537013	0.905763	0.936042	1.01648
ATXN7L2	0.0106831	0.00552429	0.00487627	0.0039809	0.00596607	0.00864775	0.00430975	0.0105755	0.002005	0.00710627	0	0.0224685	0	0
CYB561D1	0.0066665	0.0116809	0.0252821	0.0020919	0.0091114	0.0123105	0.0027636	0.0246034	0	0.0294332	0	0	0	0
GPR61	0	0.00120258	0.00266227	0	0	0	0	0	0	0	0	0	0	0
GNAI3	0.657869	0.778286	0.704703	0.609781	1.09804	0.682461	0.737353	0.584281	0.672987	0.634939	0.816605	0.332484	0.511764	0.247234
RP5-1160K1.3	0	0.00139677	0.00238251	0.00421291	0.00122592	0	0	0	0.00319592	0.00681662	0	0	0	0
AMPD2	0.207596	0.104286	0.12704	0.265349	0.358098	0.124556	0.175959	0.102651	0.0951144	0.16496	0.360274	0.133892	0	0.186476
GSTM4	0.245753	0.208695	0.195437	0.249741	0.187356	0.0986866	0.260022	0.127123	0.0647803	0.207889	0.102492	0.215426	0	0
GSTM2	0.0214804	0.0114189	0.00469169	0.0433538	0.0110763	0.0215288	0.0218735	0.00573232	0	0.0218295	0	0	0	0.0477102
GSTM1	0.0153236	0.0233267	0	0.0215841	0	0	0	0	0	0.00544992	0	0	0	0
AC000032.2	0	0.000892573	0	0.00269761	0	0	0.00182161	0	0	0	0	0	0	0
GSTM5	0	0.0025532	0.00146381	0	0	0	0	0	0	0	0	0	0	0
GSTM3	0.0242716	0.0372846	0.0693727	0.0513853	0.121687	0.0533311	0.0820234	0.0848357	0.0354635	0.0448168	0.0720593	0.00811528	0	0.157501
EPS8L3	0	0	0.00311427	0.00382394	0	0.00472606	0	0	0	0	0	0	0	0
CSF1	0.0751165	0.150308	0.0938311	0.133028	0.43484	0.0403097	0.040216	0.557414	0.401921	0.489048	0.0642854	0.057762	1.15832	0
AHCYL1	0.323375	0.441022	0.244698	0.385875	0.254173	0.374737	0.338807	0.261032	0.517417	0.380495	0.198137	0.282704	0.30735	0.2707
STRIP1	0.0777215	0.0587854	0.0906691	0.0709146	0.0731448	0.0929705	0.0725879	0.085898	0.0868311	0.0756143	0.0487014	0.0407265	0.104743	0
RP4-773N10.4	0.0039407	0.00589206	0.006948	0.00457259	0.00273939	0.00597917	0	0.0123326	0	0	0	0	0	0
KCNC4	0.0129399	0.00744189	0.009875	0.00691542	0.00525729	0.019345	0	0.0130592	0.0232966	0.0110641	0.0184015	0	0	0
RP5-1074L1.1	0.00332557	0.00483937	0.00157381	0.00423535	0.0165198	0.0134316	0.00460392	0	0.00179759	0	0	0	0	0
RBM15	0.0571661	0.135199	0.0725564	0.0453723	0.078107	0.0681592	0.0376929	0.0606338	0.071188	0.0815766	0.139149	0.0416179	0	0.0565313
SLC16A4	0.0137024	0.016347	0.000962214	0.00453659	0	0.00794444	0.00217032	0.0113988	0.00588471	0.00852813	0	0	0	0
RP5-1074L1.4	0.00645979	0.0258245	0.0163357	0.00982305	0.0029399	0.0304991	0.00845941	0.00220162	0	0.0217611	0	0	0.108648	0
LAMTOR5-AS1	0.00473957	0.0132696	0.0157449	0.00548039	0.0303818	0.0294548	0.0136764	0.0258209	0.187791	0.0079546	0.059001	0	0	0.0477102
LAMTOR5	1.87739	2.03917	2.01037	1.96032	1.70045	2.61635	2.03199	2.62449	4.19602	1.98052	2.07298	1.55961	2.40112	2.01288
RP11-284N8.3	0.0044784	0.012366	0.00638627	0.00500713	0.0150294	0.0154483	0.00166242	0	0	0.0369085	0.026189	0	0	0
KCNA3	0	0.00166859	0.00998207	0.00878757	0.0194653	0	0.0151795	0.00725071	0.010545	0.070102	0	0	0	0
CD53	3.65458	3.05024	3.65127	3.0021	3.16537	3.60703	3.21855	2.34732	1.66207	3.54988	2.96477	1.41275	1.12524	2.10613
RP11-96K19.2	0.00202213	0.00175288	0.00464826	0.00550284	0.00398199	0.00361316	0.00282153	0	0	0	0	0	0	0
LRIF1	0.118349	0.191571	0.0807401	0.139199	0.173146	0.145901	0.151157	0.121194	0.198336	0.214419	0.101909	0.204277	0.0365145	0.0408938
RP11-96K19.5	0.00329701	0.0106427	0.0121606	0	0	0.00447043	0.0114892	0.00452306	0	0.00525495	0	0	0	0
DRAM2	1.47343	0.818321	0.982686	1.07958	1.42608	1.10034	1.21192	0.817464	1.32906	0.794619	1.1726	0.21086	0.418008	0.703771
CEPT1	0.241806	0.216692	0.297886	0.245311	0.246038	0.253645	0.173226	0.192697	0.211475	0.154538	0.119029	0.029429	0	0
RP5-1180E21.4	0.00236718	0	0.00251619	0	0	0.00732218	0.00302934	0.00389873	0.00849475	0	0	0	0	0
RP5-1180E21.5	0.0136774	0.0143388	0.0285878	0.00317146	0.0156407	0.00803857	0.0126798	0.00856925	0.0521799	0.0152244	0.0160518	0	0	0
DENND2D	0.223063	0.184884	0.261775	0.160829	0.0854967	0.229201	0.24312	0.2133	0.352844	0.403911	0.175104	0.0840585	0.158975	0.0859254
CHI3L2	0.0101816	0.00755643	0.020264	0.0168551	0.00667893	0.00414478	0.0138266	0.057934	0.00637488	0.0193918	0	0	0	0
PIFO	0.0849586	0.0618087	0.0126005	0.0749045	0.132363	0.0047511	0.0319049	0.0111058	0.20328	0.0740439	0.176688	0	0.201597	0
OVGP1	0.0012026	0.0104585	0.00996607	0	0.00467587	0.351389	0.0185916	0.0148275	0	0.023567	0	0.0300528	0	0.240317
WDR77	0.242301	0.294361	0.243403	0.248647	0.308285	0.361986	0.261202	0.102042	0.127223	0.245468	0.241889	0.273197	0.356386	0.289292
ATP5F1	1.73204	2.18586	1.68723	1.97867	1.78415	2.18358	1.88887	1.29235	1.69869	1.72216	2.06746	1.60251	1.4172	1.29799
C1orf162	3.46055	2.97825	3.02965	4.10303	4.47013	3.50168	3.49364	1.34298	0.789015	2.53511	6.49694	3.54923	1.87655	0.894041
ADORA3	0.797291	0.566947	1.60674	0.244432	0.49443	0.56904	0.932571	0.563602	0.0452232	0.592458	0.0255558	0.0817437	0.148122	0
RAP1A	2.92037	2.63619	1.98356	2.98632	1.84697	2.15079	2.44003	1.49585	1.30013	2.35961	2.11077	1.13872	2.171	0.875471
LINC01160	0.00284314	0.00185028	0.00120277	0.00241956	0	0.00336633	0.00159996	0	0	0	0	0	0	0
FAM212B	0.0262358	0.027129	0.0395473	0.0205013	0.0138957	0.0183764	0.0434965	0.0168162	0.0178961	0.023559	0.0427181	0	0.173106	0
DDX20	0.0654771	0.113377	0.0627911	0.0683791	0.0803247	0.0635241	0.070972	0.0707267	0.0859834	0.0632289	0.0330933	0.0381115	0.0365145	0.0477102
KCND3	0	0.00353244	0.00089684	0	0	0	0.00250468	0	0	0	0	0.0101188	0	0
CTTNBP2NL	0.393625	0.256051	0.32603	0.327	0.53013	0.366301	0.555019	0.361691	0.242599	0.326012	0.0991041	0.380984	0	0.0477102
WNT2B	0.0209901	0.0104506	0.0198502	0.0138765	0.0186796	0.00758673	0.0104587	0.0397624	0.0256781	0.00511497	0.0108378	0	0	0
RP4-671G15.2	0	0.00285166	0.00224739	0	0	0	0.00276998	0	0	0	0	0	0	0
ST7L	0.0748016	0.104741	0.0411734	0.062471	0.0672458	0.102866	0.076117	0.0412728	0.0875305	0.0821256	0.027392	0.0632636	0	0
CAPZA1	2.37932	2.81886	1.59062	2.4478	2.57703	1.95407	2.23467	1.119	2.0587	2.43272	2.1431	1.58995	1.69465	1.19399
MOV10	0.0936055	0.122697	0.159471	0.055203	0.0849357	0.1284	0.0876223	0.0738495	0.029116	0.0890988	0.0498365	0.0561349	0	0.0542597
RP11-426L16.3	0.00126949	0.00689347	0.0024955	0	0	0	0	0	0	0	0	0.014264	0	0
RHOC	1.31211	1.31921	1.97112	1.32573	1.43894	1.51066	1.83143	1.68818	0.50442	1.96124	1.9967	1.62175	0.694135	0.247186
PPM1J	0.00357803	0.00692587	0.00138016	0.0483477	0.0131592	0.00225168	0.00134261	0	0.0152396	0.010299	0	0.232947	0	0.262091
FAM19A3	0	0.00455929	0	0	0	0	0	0	0	0.00229298	0	0	0	0
RP11-426L16.8	0.0385376	0.0154538	0.00850281	0.0254285	0.0458689	0.0143628	0	0	0	0.0120953	0	0.120295	0	0
RP3-522D1.1	0.188338	0.104246	0.1127	0.122129	0.246376	0.12927	0.0948596	0.0114362	0.0031855	0.0690852	0.0184015	0.182481	0	0
SLC16A1	0.150193	0.234804	0.151278	0.155292	0.138686	0.186159	0.100779	0.127388	0.0272967	0.125454	0.0499266	0.0514783	0	0
SLC16A1-AS1	0.0105987	0.0349908	0.0429198	0.011158	0.0065396	0.0236336	0.0242251	0.01763	0.0186357	0.0338146	0	0	0	0
RP11-389O22.1	0	0.00416348	0	0	0	0	0	0.00312693	0	0.00304023	0	0	0	0
RP11-31F15.2	0	0	0.0030374	0.00151482	0	0.00231073	0	0	0.00499546	0	0	0	0	0
LRIG2	0.0463849	0.0222393	0.0432891	0.0360225	0.0257279	0.0545026	0.0753286	0.0567921	0.0229951	0.052964	0.0265175	0.0126079	0.277275	0
MAGI3	0.00831737	0.0111405	0.0102501	0.0104672	0	0.0254001	0.00854826	0.00730149	0	0.00598271	0.0083636	0.0320941	0	0
PHTF1	0.161229	0.273516	0.145044	0.31742	0.139381	0.141745	0.157382	0.0830464	0.106095	0.348841	0.0710932	0.100566	0.545546	0.226152
RSBN1	0.211136	0.277065	0.206023	0.2339	0.140533	0.216293	0.132093	0.359702	0.149597	0.540198	0.15122	0.0384276	0.256741	0.104739
PTPN22	0.369033	0.380088	0.19222	0.474255	0.273282	0.228202	0.270303	0.167975	0.079823	0.719901	0.156174	0.244875	0.342319	0.601812
AP4B1-AS1	0.00423682	0.00353406	0.00580339	0.00278096	0	0.00765432	0	0	0	0.00342028	0	0	0	0
BCL2L15	0.00203611	0.0120569	0.00533079	0.0154139	0.0131853	0.0133487	0.00359549	0	0.00342491	0.0131222	0	0	0	0
AP4B1	0.0480548	0.0494001	0.0823212	0.0356238	0.0747801	0.0418251	0.0396367	0.0477875	0.0354349	0.0665082	0	0.0613753	0	0.090712
DCLRE1B	0.0422602	0.103304	0.0995229	0.0459022	0.0846476	0.0475835	0.0430896	0.0844374	0.0334524	0.0526487	0	0.00811528	0	0
RP5-1073O3.7	0.0180115	0.0228215	0.0246134	0.0315964	0.0337606	0.00700701	0.0321517	0.0192929	0.0285012	0.0611266	0.0128912	0	0.0987128	0
HIPK1	0.282661	0.355343	0.234229	0.280191	0.163735	0.349748	0.231682	0.209409	0.201526	0.294916	0.315294	0.189355	0.375181	0.199395
OLFML3	1.96933	1.38278	0.679595	0.657313	0.764831	0.83945	1.32552	0.0896723	0.0113128	0.539742	0.0383191	0	0	0
SYT6	0.0246473	0.0186284	0.00909029	0.00472241	0.0125563	0.0148861	0.0529061	0	0.00179759	0.0033918	0	0	0	0
TRIM33	0.226158	0.262483	0.18887	0.232954	0.0932836	0.285199	0.185107	0.298708	0.478956	0.287988	0.0915234	0.259089	0.369246	0.254326
BCAS2	0.589411	0.759297	0.673407	0.586879	1.22698	0.522546	0.542701	0.695153	0.921383	0.947553	0.94593	0.327009	1.39819	0.714886
DENND2C	0.0105846	0.00337825	0.0057857	0.00173386	0.00411964	0	0.00628546	0.00900402	0.00608589	0.00442061	0	0	0	0
NRAS	0.235954	0.311116	0.248642	0.216931	0.191987	0.216667	0.334037	0.262419	0.298206	0.275547	0.115951	0.108569	0.343263	0.0822206
CSDE1	1.53591	1.25993	1.3052	1.60517	1.6921	1.07353	1.55405	1.69517	2.50644	1.61249	1.34327	1.69829	2.13888	1.93885
SIKE1	0.280881	0.317599	0.288369	0.227585	0.215203	0.293313	0.239199	0.396855	0.211146	0.285825	0.118251	0.145559	0.534793	0.132806
TSPAN2	0.000851846	0	0.00185867	0	0.00223554	0	0	0.00597275	0.00811892	0.0203477	0.118211	0.157344	0	0.0822206
RP4-666F24.3	0	0.000854774	0	0.00492014	0.00354343	0	0	0	0.00540131	0	0	0	0	0
VANGL1	0.0226128	0.0534903	0.0323058	0.0293752	0.0212382	0.0657549	0.0208108	0.0235862	0.00214284	0.0344344	0.0132906	0.046295	0	0
SLC22A15	0.0345202	0.032402	0.0415389	0.0237446	0.00950071	0.0236204	0.0200162	0.07614	0.0413608	0.051443	0.0417535	0	0	0
MAB21L3	0.0020234	0.00242217	0	0	0	0.00130815	0	0.00452306	0	0.0031909	0	0	0	0
ATP1A1	1.10513	1.3443	0.954716	1.25202	2.32591	0.985697	1.15069	0.664503	1.28831	1.32783	1.53446	2.00656	0.81133	0.597416
RP4-655J12.4	0.00152739	0.000934517	0.000676968	0	0.00207834	0	0.00161229	0.0026582	0	0	0	0	0	0
RP5-1086K13.1	0.00316404	0.00123767	0	0.00540798	0.00154498	0.00293039	0.00122293	0	0.00421898	0	0	0	0	0
CD58	0.899957	0.834168	0.671978	1.10016	1.07152	0.74915	0.519466	0.694031	0.783925	0.865752	0.289983	0.543668	0.440718	0.0810708
IGSF3	0.00405383	0.0219922	0.000714456	0.0101152	0.0139739	0.0157264	0.00397328	0.00336636	0	0	0.0294228	0	0	0
CD2	0.046785	0.152385	0.229471	0.252165	0.17515	0.10961	0.0822507	0.262538	0.165074	2.62615	0.355748	0.24619	0.0978091	0.2738
RP4-753F5.1	0.00271158	0	0.00143345	0	0	0	0	0	0	0	0	0.0103015	0	0
PTGFRN	0.0885888	0.0882181	0.0695092	0.068153	0.0303367	0.122207	0.0513064	0.0429343	0.030294	0.0614652	0.0108378	0	0	0.0814047
CD101	0.0121374	0.0588408	0.00930022	0.100755	0.0204809	0.0337918	0.0435744	0.00449598	0	0.0687668	0.0133424	0	0	0.154645
RP11-27K13.3	0	0.00372644	0.00371769	0	0.00421009	0	0	0.003477	0	0.00360611	0	0	0	0
TTF2	0.103642	0.410513	0.0724646	0.128499	0.0821955	0.081151	0.0917409	0.0409564	0.0708126	0.110038	0.159594	0.227673	0.0832667	0
TRIM45	0.00143143	0.0055142	0.0011781	0.00326158	0.00254728	0	0.00749162	0	0	0.00496156	0.0083636	0	0	0
VTCN1	0.0114962	0.0137462	0.011036	0.00819528	0.00749265	0.00225168	0.00284979	0.0179493	0.00319592	0.00354898	0.0108378	0	0	0.0810708
RP11-188D8.1	0.000843485	0.000594926	0.00442021	0	0	0	0.00223147	0.00218477	0.00461166	0	0	0	0	0
MAN1A2	0.192776	0.168385	0.197681	0.22646	0.0794461	0.245943	0.265612	0.0812119	0.139951	0.29029	0.24437	0.271212	0.072704	0
FAM46C	0.0088349	0.0107199	0.0109466	0.0390655	0.0929309	0.0103955	0.0179187	0.0304344	0.0562594	0.194603	0.0919137	0.212728	0	0
GDAP2	0.104636	0.102761	0.0893079	0.133217	0.134534	0.115847	0.13161	0.0745722	0.127682	0.082388	0.0913019	0.0390706	0.105565	0
WDR3	0.0629114	0.106025	0.0668418	0.0696092	0.0408372	0.113116	0.0985076	0.0642127	0.0601247	0.141832	0.0264148	0.0454448	0.111259	0
SPAG17	0.0195401	0.00907373	0.00507514	0.0275094	0.00251886	0.00756906	0.00677371	0	0.0232343	0.0114469	0	0	0	0
WARS2	0.0507472	0.0656001	0.0532596	0.0450854	0.0692236	0.0460514	0.0838635	0.0277318	0.0184986	0.0513817	0.0905401	0.0539826	0	0
RP11-418J17.1	0.0131417	0.00115222	0.00172442	0.0104766	0.0118369	0.012972	0.00465088	0.00468187	0	0.0111692	0	0	0	0
ZNF697	0.0172388	0.00867806	0.0211687	0.00855958	0.00332749	0.0198531	0.0207829	0.0574382	0.0543863	0.0243643	0	0	0	0
PHGDH	0.0860281	0.239415	0.0348062	0.119901	0.00986366	0.0150296	0.0199624	0.0354729	0.0316659	0.0563826	0.0278379	0.0182341	0	0.118115
HMGCS2	0	0.00410024	0.00201322	0	0	0.081784	0	0.00415045	0	0	0	0	0	0
REG4	0	0.00165516	0.00397059	0	0	0	0.00591593	0.0133017	0	0.0386952	0.0139658	0	0	0
NOTCH2	0.117493	0.144308	0.157335	0.111188	0.138623	0.211523	0.155308	0.306835	0.435916	0.212131	0.33722	0.208757	0	0.266064
RP11-439A17.7	0.115615	0.117884	0.0958727	0.120297	0.068523	0.072237	0.116525	0.0362442	0.0486281	0.159436	0.0499794	0.0910973	0	0.576262
FAM72B	0.0242861	0.107522	0.0946699	0.0389522	0.021458	0.0379231	0.042902	0.0111375	0.00435865	0.0192562	0.0249955	0.0284565	0	0
RP11-439A17.9	0.00403155	0.00580151	0.00645268	0	0.00502963	0.00141494	0.00502735	0	0	0	0	0	0	0
FCGR1B	1.29225	0.46363	0.736394	0.354394	0.296456	0.38701	0.697215	0.123162	0.0169228	0.469838	0.233785	0	0	0
RP11-343N15.1	0.00680364	0.00233653	0	0.00251186	0.00643292	0	0	0	0	0	0	0	0	0
RP11-343N15.5	0.30667	0.352696	0.194502	0.336242	0.695114	0.175926	0.339706	0.110103	0.139624	0.346222	0.639673	0.187501	0	0.443325
AL592494.5	0.00258878	0.00103886	0.0084978	0.00280911	0.0112533	0.001662	0	0	0	0	0	0	0	0
RP11-344P13.6	0.00673515	0.00591923	0.00425079	0.00573634	0	0.00363217	0.00668368	0	0	0.0101211	0.0240743	0.00841057	0	0
RP11-417J8.3	0.00658203	0	0.00147661	0.00430949	0.00232859	0	0	0.00185288	0	0	0	0	0	0
RP11-417J8.6	0.0025652	0.00278874	0.0604635	0	0	0	0	0	0	0.00637083	0	0	0	0
RP11-423O2.5	0.00617269	0.00212723	0.00309037	0.00407856	0	0	0	0	0.00387466	0.00549728	0	0.0241866	0	0
RP11-782C8.1	0.00423555	0.0058974	0.00588698	0.0123499	0.014524	0	0.00199472	0.0110277	0.0456329	0	0.0224434	0	0	0.102374
RP11-782C8.3	0.00785899	0.00141077	0	0	0	0	0	0.00103002	0	0	0	0	0	0
RP11-782C8.5	0.00822065	0	0.00759552	0	0.0179439	0	0	0	0	0.0147108	0	0	0	0
RP11-435B5.3	0.00401868	0	0.0036952	0	0.00609861	0	0	0	0	0.00893971	0	0	0	0
RP11-435B5.4	0.00196533	0.00415364	0.00281263	0.00175991	0.0101585	0.00203184	0	0.00103002	0.00392241	0	0	0.0241866	0	0.102374
RP6-206I17.1	0	0.00212723	0.00213092	0.00223988	0	0.00689832	0.0146433	0	0.00949147	0.0150934	0	0	0	0
RP6-206I17.2	0.00109241	0.000502586	0.00651997	0.00713026	0	0.00685725	0.00346431	0.00171153	0.00487491	0	0	0	0	0
PPIAL4G	0.00115707	0.0010635	0.00197493	0	0.0037922	0	0	0	0	0	0	0	0	0
FAM72D	0.0223729	0.101958	0.0113201	0.00592502	0.0156674	0.0118858	0.00215227	0.00527475	0.0081952	0.0155073	0.0760602	0.0137865	0	0
LINC00623	0	0	0.00203617	0.00946604	0.00950779	0.00162958	0.00365258	0	0	0.00211152	0	0	0.0836344	0
AL592284.1	0.175065	0.0878965	0.129563	0.145261	0.118571	0.103029	0.0835466	0.19004	0.261956	0.239999	0.216287	0.0296503	0.195679	0.138766
RP11-640M9.1	0.159425	0.149845	0.270607	0.100573	0.124516	0.223108	0.128064	0.18984	0.119275	0.416255	0.0910286	0.0544649	0.332937	0.173613
NBPF9	0.0246763	0.0342498	0.0813761	0.0270634	0.00704077	0.0527638	0.0253672	0.0782382	0.0296953	0.0198457	0.0307779	0.0604486	0	0.235684
RP4-791M13.3	0.0013263	0.000503728	0.0010117	0	0	0	0	0	0	0	0	0	0	0
PDE4DIP	0.243543	0.108813	0.423982	0.0933658	0.307842	0.263255	0.309049	1.02708	0.669364	0.287593	0.117868	0.28107	0.173106	0.143203
AL590452.1	0.00726862	0.007247	0.0261792	0.00621678	0.0236315	0.00629523	0.0279028	0.0231591	0.0138807	0.0307949	0.067424	0	0	0
RP11-326G21.1	0.00477724	0.0011667	0.0108198	0.00734399	0	0.011216	0.00702266	0	0.00380898	0.0166922	0.0199176	0	0	0
NOTCH2NL	0.126516	0.182145	0.3837	0.175123	0.307364	0.14958	0.236352	0.477983	0.838082	0.262494	0.766695	0.370602	1.15826	1.14231
NBPF10	0.107087	0.131633	0.157556	0.159486	0.13268	0.192126	0.164793	0.233244	0.284333	0.226596	0.399648	0.250818	0.0885395	0.796993
RP11-458D21.1	0.00185325	0	0.000814833	0.00401551	0	0.0017365	0.00336794	0	0.00612669	0.0033918	0	0	0	0
TXNIP	1.64388	1.81071	4.36825	1.70548	1.56172	3.29048	4.08419	4.81532	2.75205	5.58207	4.22465	1.73866	1.36509	2.29296
POLR3GL	0.533117	0.565484	0.467062	0.361051	0.473769	0.56523	0.549472	0.357608	0.944421	0.698928	0.422254	0.148424	1.36645	0.581598
ANKRD34A	0.00147241	0.00493023	0.000593335	0.00186884	0	0.000979433	0	0.00586325	0	0	0	0	0	0
RP11-315I20.1	0.0146582	0.00580648	0.00634864	0.00354426	0.00741353	0.00508073	0.00306805	0.00572606	0.0112776	0.0149253	0	0	0	0
LIX1L	0.210783	0.201102	0.149527	0.205058	0.153084	0.162936	0.178698	0.145019	0.151694	0.194105	0.123575	0.20653	0.14192	0
RBM8A	1.31699	2.18063	1.26254	1.58653	1.99373	1.38954	1.33157	1.54824	2.22546	1.67708	2.19531	1.61815	2.38396	1.15005
PEX11B	0.14262	0.115649	0.0754623	0.0979174	0.0493177	0.130811	0.124418	0.0573105	0.206435	0.111714	0	0.0693982	0.0987128	0.133354
ITGA10	0.00503494	0.00516661	0.00957128	0.0212146	0.0113288	0.0305681	0.00847467	0.0113856	0.00468572	0.00577109	0	0	0	0
ANKRD35	0.0334772	0.0687777	0.0357678	0.0456754	0.016059	0.0161025	0.0274497	0.0181481	0.0312356	0.105545	0.0465895	0	0.218494	0
PIAS3	0.0513133	0.0704668	0.0530669	0.0421962	0.0315058	0.0977048	0.0451185	0.0490214	0.0377887	0.07565	0.0264631	0.0459956	0	0.0729868
NUDT17	0.00885726	0.0147233	0.00514195	0.00381415	0.00932866	0.0166077	0.00791148	0.00740216	0.0214637	0.00947968	0	0.0435669	0	0.102374
POLR3C	0.0799461	0.0995206	0.103844	0.10562	0.0638441	0.0761577	0.0812374	0.0813036	0.0745098	0.107993	0.0240743	0.0992003	0	0
RNF115	0.261377	0.390637	0.226852	0.296468	0.191804	0.29469	0.28852	0.172976	0.209935	0.454411	0.190159	0.337031	0.501427	0.437194
CD160	0.00851102	0.0179994	0.00469633	0.0107026	0.0135962	0	0.0164342	0.0153102	0.0120384	0.168776	0.062666	0.0134868	0	0.0867483
PDZK1	0	0.000955425	0.00571	0	0	0.0122565	0	0	0	0	0.0186821	0	0	0
GPR89A	0.0824477	0.107103	0.0597672	0.0866624	0.136724	0.0673666	0.0605153	0.0396756	0.156172	0.135347	0	0.0466018	0	0.0408938
GPR89C	0.00170721	0.00178675	0.00305619	0	0.00305419	0	0	0	0	0	0	0	0	0
NBPF11	0.00152644	0.0067472	0.00777906	0.0115456	0	0.011088	0.0101956	0.00624713	0	0.0103085	0	0	0	0
NBPF12	0.0300089	0.0220787	0.0233264	0.0266743	0.0130887	0.0437578	0.0219766	0.0177012	0.0299094	0.0213936	0.0268896	0.0601294	0	0
PRKAB2	0.0334716	0.0529784	0.0458134	0.0310876	0.0186942	0.042431	0.0274902	0.0572066	0.00585992	0.0332938	0	0.0466603	0.108648	0
RP11-337C18.8	0.0176417	0.0245023	0.034817	0.0243069	0.0291046	0.0318089	0.0506967	0.0292263	0.0077581	0.0285341	0.0398599	0.0160537	0	0
FMO5	0.0211749	0.0166109	0.0254328	0.0115157	0.0275931	0.0208648	0.0233678	0.0138237	0.00781251	0.005145	0	0.127864	0.0987128	0
RP11-337C18.9	0.00311687	0.00248678	0.00163419	0.00234507	0.00326805	0	0.00375293	0	0	0.00502556	0	0	0	0
CHD1L	0.145786	0.237177	0.148918	0.216054	0.145407	0.174916	0.173043	0.126148	0.107454	0.13368	0.0477336	0.0992381	0.105565	0.090712
BCL9	0.0215912	0.0158302	0.0114309	0.0173677	0.00971426	0.0274132	0.01807	0.0137072	0.0158603	0.012014	0	0.0134868	0	0
ACP6	0.0310312	0.034094	0.0406011	0.0131624	0.0129964	0.0718105	0.0321614	0.0275311	0.0172477	0.0897615	0	0.0285281	0	0.0816187
GJA5	0	0	0.0112423	0	0	0	0.00139597	0.00538523	0	0	0	0	0	0
GPR89B	0.0007245	0.000810344	0.00336327	0.00185989	0.00462838	0.00218347	0.00284836	0.014126	0.00524948	0	0	0	0	0
NBPF24	0.00370443	0.00158495	0	0.00221032	0.00249404	0	0	0.00166354	0	0	0	0	0	0
XXyac-YX155B6.5	0	0	0.00440071	0	0	0.00230323	0.00336794	0	0.00763664	0	0	0	0	0
LINC01138	0.00123939	0.00226665	0	0	0	0.00590163	0	0	0	0	0	0	0	0
NBPF14	0.0161406	0.0167273	0.0113956	0.0420551	0.0079161	0.00350193	0.0649209	0.0120036	0	0.0200585	0.0396344	0.00841057	0	0
RP11-89F3.2	0.00249593	0.000871346	0.00354429	0.00471863	0	0	0	0	0.00898004	0.0177103	0	0	0	0
NBPF20	0.00584039	0.00390637	0.00652622	0.00338091	0	0.0128774	0.0123779	0.00702635	0.00690557	0.0128003	0	0	0	0.0867483
NBPF15	0.00621458	0.00750537	0.0214637	0.00541256	0	0.00820714	0.00844453	0.00988832	0.00219054	0.0264828	0	0	0.0832667	0
RP11-666A1.5	0.00361574	0.00224889	0.00429636	0.00557414	0.00063092	0	0.00233122	0.00891347	0	0.0127482	0	0	0	0
NBPF16	0.0026164	0	0.00430342	0	0.00156505	0.00156589	0.00213869	0	0	0	0.017972	0	0	0
RP11-763B22.4	0.00269107	0	0.005692	0.00232449	0.0026307	0	0	0.00234472	0	0.00323837	0	0	0	0
RP11-14N7.2	0.029302	0.0350264	0.0461668	0.0413041	0.0462593	0.160082	0.0671835	0.0250615	0.0314378	0.0502337	0.0621483	0.108054	0.153037	0
RP11-403I13.5	0.023815	0.00887194	0.0306604	0.00247138	0.034056	0.0357657	0.00123816	0.0293334	0.0110809	0.00495188	0	0	0	0
RP11-403I13.4	0.00547996	0.00193857	0.00280274	0.00567568	0	0.0034915	0	0	0.00432405	0.00321494	0	0	0	0
RP11-403I13.8	0.02041	0.0152532	0.0193086	0.0101333	0.0133069	0.019429	0.0291159	0.0219645	0.0197188	0.0353917	0	0	0.141257	0
RP11-403I13.9	0.00495764	0.00161507	0.00127911	0.00741582	0	0	0.00179527	0	0	0.00354593	0	0	0	0
RP5-998N21.4	0.00780617	0.00530011	0.010534	0.00115797	0.00705105	0	0	0	0	0.0101257	0	0	0	0
FAM72C	0.000735952	0.0683028	0.000879667	0.00274931	0.0209622	0	0	0	0	0.00413309	0	0	0	0
RP11-277L2.4	0.00701761	0.0125562	0.0140153	0.00228934	0.060986	0.0017365	0.00810719	0.0116527	0.0403743	0.113536	0.0312578	0.0101188	0	0.0482074
RP11-277L2.3	0.0499025	0.0344647	0.0270338	0.0417214	0.0352013	0.0409753	0.0298914	0.0483637	0.084514	0.0406165	0.026189	0.0432064	0	0.107699
RP11-277L2.5	0.00141874	0.00671769	0.0109863	0.00202819	0.0112936	0.000914342	0.0168459	0.0204081	0.0767841	0.0135621	0	0	0	0
RP11-353N4.1	0.0411131	0.00295617	0.014852	0.00463558	0.0413861	0	0.0205206	0.0455237	0.209313	0.0136337	0.0378636	0.0340307	0.0987128	0
RP11-353N4.5	0.00912019	0.00487582	0.0137076	0.00857863	0.00279624	0.0040316	0.0127545	0.0103509	0	0.00314241	0	0	0	0
RP11-353N4.4	0	0.000504836	0.0032369	0.00642435	0	0.00680076	0.00802707	0	0	0	0	0	0	0
FCGR1A	3.55519	1.65072	3.23884	1.03893	1.32184	2.52863	3.06176	0.817067	0.326765	1.63087	0.753584	0	0.128483	0
HIST2H2BF	0.0110679	0.0155039	0.00535223	0.00423508	0.00906393	0	0.00506278	0.012334	0	0.0040699	0	0	0	0.107699
RP11-196G18.3	0.00703531	0.00711656	0.00450878	0.00169985	0.00302215	0.00616789	0.0175003	0.00860669	0.0129062	0.00573905	0	0	0	0
HIST2H3D	0.00199783	0.00294084	0	0.00199949	0.00343606	0	0	0	0	0	0	0	0	0
RP11-196G18.23	0.0102388	0.0198057	0.00136464	0.00421541	0	0.0188493	0.00752923	0.00686211	0.00501993	0	0	0.0224737	0	0
HIST2H4A	0	0.00994185	0	0	0	0.00427779	0	0.00397638	0	0.00757125	0	0	0	0
HIST2H2AA3	0.293507	0.182603	0.16128	0.254603	0.280864	0.230956	0.346113	0.246252	0.211966	0.197846	0.281542	0.190248	0.0968542	2.57803
RP11-196G18.24	0.015164	0.0209697	0.0212655	0.0104467	0.00694368	0.0239041	0.0133486	0.01209	0	0.0189459	0	0.00811528	0	0.0814047
HIST2H2BE	0.161154	0.107482	0.0979975	0.141513	0.113321	0.25894	0.135455	0.13308	0.15451	0.113147	0.12797	0.25173	0	1.15273
HIST2H2AC	0.112956	0.846166	0.163769	0.171762	0.111149	0.12221	0.185841	0.107562	0.0213564	0.248065	0.167171	0.321378	0	0.174466
HIST2H2AB	0.000843485	0.00391041	0	0.00718438	0.0041235	0	0.00422999	0.00204331	0	0	0	0	0	0
BOLA1	0.0912552	0.156992	0.127701	0.0646344	0.0459326	0.0911479	0.109225	0.045238	0.0365006	0.141121	0	0.0641881	0	0.256361
SV2A	0.00295707	0.0083776	0	0	0	0	0	0	0	0.0233135	0	0	0	0
SF3B4	0.296493	0.482204	0.408174	0.422409	0.333167	0.29852	0.366555	0.269267	0.379284	0.443681	0.311082	0.212616	0.579555	0.325201
MTMR11	0.0115506	0.016611	0.0105203	0.0145741	0.00880058	0.00752353	0.0333646	0.0437382	0.0260322	0.0283434	0.509896	0	0.104743	0
OTUD7B	0.0203082	0.00869679	0.00984332	0.00576092	0.0124042	0.0640679	0.0163558	0.0174806	0	0.0353874	0	0	0	0
VPS45	0.156762	0.183974	0.163155	0.127124	0.0773461	0.19405	0.121197	0.0921201	0.0807667	0.157228	0	0.070043	0.209621	0.291606
PLEKHO1	0.951345	1.08841	1.41348	1.13069	0.824765	1.07353	1.15477	0.953382	1.51676	1.16644	0.453362	1.41319	0.0535699	0.495478
ANP32E	0.486303	1.85315	0.36512	0.637192	0.533103	0.546476	0.40386	0.507977	0.300366	0.662065	0.351208	0.528009	0.705526	0.171322
CA14	0	0.00172205	0.00115183	0	0	0	0	0.00118105	0	0.00252091	0	0	0	0.0930613
APH1A	0.926092	1.06772	1.206	0.86432	0.815652	0.93339	1.40427	0.773327	0.871283	0.907558	0.501649	0.929505	1.25374	0.435462
C1orf54	2.60277	1.5493	2.27322	1.39941	1.93584	2.19079	1.22741	1.02451	0.275861	1.16937	0.26692	8.27039	0.351116	0
C1orf51	0.0253996	0.0187446	0.0322466	0.0154167	0.0196349	0.0124305	0.011006	0.0754835	0.0060894	0.00442061	0	0.0143781	0	0
MRPS21	1.84677	2.09965	1.63761	1.60482	1.22339	1.94906	1.48276	1.20162	1.23155	1.51685	1.42932	1.07605	2.10727	2.36467
PRPF3	0.0550826	0.10597	0.0958316	0.071012	0.0565919	0.0736977	0.115153	0.11466	0.152693	0.124948	0.0836248	0.107933	0	0.195499
RPRD2	0.118097	0.128751	0.140281	0.0707691	0.0793869	0.112135	0.160564	0.101386	0.112316	0.202852	0.0424898	0.0162306	0	0.514912
TARS2	0.0763132	0.10965	0.100607	0.0565459	0.0504259	0.109774	0.0752568	0.0597269	0.0869686	0.0924783	0	0.0623462	0.0968542	0.222656
ECM1	0.0290162	0.0861797	0.235995	0.0295181	0.0187337	0.0541493	0.108542	0.256133	0.0158243	0.130594	0.0257825	0.0267156	0	0.0930613
LINC00568	0.00475598	0.00666781	0.0358574	0.00231119	0.00263595	0.010267	0.00351591	0.00283196	0	0.0130643	0	0	0	0
RP11-54A4.2	0.00282739	0	0.00571542	0.00470434	0	0	0.00127966	0.00718965	0.00255515	0.00280676	0	0	0	0
ADAMTSL4	0.0623963	0.0384986	0.12749	0.0605673	0.0370741	0.116184	0.0753314	0.113457	0.0343886	0.0843968	0.0942968	0.0737969	0	0
ADAMTSL4-AS1	0.00644828	0.00361725	0.00565401	0.00395958	0.0306056	0	0	0	0.0101662	0	0	0	0	0
MCL1	5.63616	3.15894	2.28871	4.50437	6.28298	1.7514	3.83788	1.84195	1.83566	4.64624	8.16192	4.00652	7.03673	6.82906
ENSA	1.38873	1.85056	1.40533	1.31834	1.36071	1.21993	1.46557	0.854301	1.05011	1.67682	1.09677	3.86429	1.96645	0.895048
GOLPH3L	0.113476	0.122253	0.0919577	0.0960174	0.0759257	0.102741	0.0556662	0.0821336	0.0647512	0.0919817	0.0303122	0.0575995	0	0.154606
HORMAD1	0.00414201	0.00540421	0.00718655	0.00915248	0.0029399	0.0184185	0.00574163	0.00176393	0	0.007204	0	0	0	0
CTSS	7.50306	4.61366	8.5036	6.37113	6.59868	7.82028	7.613	5.38732	14.6805	5.12746	18.8868	2.88505	1.32774	2.9096
CTSK	0.0125565	0.0244868	0.0971159	0.0464954	0.253609	0.0294271	0.0301397	1.85508	31.2661	0.304438	0.252524	0.0316608	0.167579	0
ARNT	0.127815	0.140175	0.194973	0.113775	0.097935	0.114866	0.104837	0.170273	0.134732	0.167706	0.136529	0.0558709	0.170486	0.294278
SETDB1	0.0702845	0.0837057	0.0752413	0.0804424	0.0516864	0.130036	0.0888527	0.0969134	0.0756844	0.0638806	0.05473	0.0184627	0	0
CERS2	0.320905	0.364277	0.405095	0.248371	0.148227	0.307236	0.224817	0.311149	0.195942	0.292172	0.233337	0.181879	0.387565	0.254904
RP11-316M1.12	0.00326336	0.00230275	0	0	0	0	0	0	0	0	0	0	0	0
RP11-316M1.3	0	0.00342278	0.00173726	0	0	0	0	0	0	0.00903277	0	0	0	0
ANXA9	0.0101933	0.00830433	0.00805406	0.00516128	0.00477384	0.00300047	0	0.00712928	0.00460408	0.0310268	0.0265175	0	0	0
FAM63A	0.045349	0.0441957	0.0409092	0.0492201	0.0147255	0.0181229	0.0168341	0.0400693	0.0274587	0.0338199	0.028182	0	0	0.0845059
PRUNE	0.0395852	0.0256656	0.0563375	0.0291254	0	0.0599428	0.0379571	0.0377993	0.0212131	0.0760453	0	0.0184627	0.072704	0
BNIPL	0.0132259	0.0155453	0.0236477	0.0146802	0.0311317	0.0181527	0.0251396	0	0	0.0230411	0	0.0224685	0	0
C1orf56	0.766816	0.637907	0.320241	0.862972	1.32777	0.321057	0.43679	0.19091	0.648052	1.0589	1.39106	0.952826	0.698209	0.836215
CDC42SE1	1.09155	0.910628	0.67297	1.28953	1.35433	0.785318	0.926249	0.416059	0.640165	1.44795	1.51428	0.89037	0.924256	0.34098
MLLT11	0.163106	0.197717	0.0796918	0.139068	0.0834873	0.038428	0.119278	0.123663	0.034076	0.101879	0.0108378	0.0321242	0	0.0408938
GABPB2	0.0633545	0.106224	0.0926029	0.0564654	0.0394518	0.0710512	0.0580039	0.0573678	0.0480297	0.0865259	0.0290262	0.0483503	0	0.267741
SEMA6C	0.00623993	0.00283959	0.00699554	0	0	0.00864265	0	0.00714222	0.00828244	0.00224257	0	0	0	0
TNFAIP8L2	0.799968	0.586869	0.693002	0.741605	0.303942	0.661124	0.661678	0.133215	0.184486	0.386095	0.140719	0.252515	0.158975	0.202813
SCNM1	0.64502	0.567885	0.604089	0.736663	0.378629	0.434667	0.523465	0.442506	0.360184	0.444572	0.401313	0.73764	0.576468	0.653898
LYSMD1	0.00156663	0.00305121	0.000545849	0.00241956	0.00488021	0	0.00407881	0.007579	0.0115113	0.00607108	0	0.0397988	0	0
VPS72	0.212173	0.204453	0.260863	0.22922	0.121666	0.273684	0.186265	0.188401	0.16855	0.192645	0.1404	0.289467	0	0
PIP5K1A	0.109393	0.166863	0.134164	0.12553	0.0963464	0.170163	0.0821709	0.0930575	0.100136	0.119173	0.0961953	0.208043	0.355086	0.385679
PSMD4	1.11456	1.19492	1.14634	1.20117	0.939478	1.20438	1.1585	1.0618	0.807508	1.17027	1.07357	1.03691	0.572055	0.851468
RP11-126K1.2	0.025751	0.0129876	0.00812047	0.0279585	0.0343986	0.0138028	0.0185868	0.00265959	0.028206	0.0341373	0.0743556	0	0	0
ZNF687	0.0466898	0.0252393	0.0591236	0.0285798	0.0203606	0.0335612	0.0258757	0.0425744	0.0354347	0.026618	0	0	0	0
PI4KB	0.182181	0.152299	0.194363	0.204003	0.103903	0.161398	0.194955	0.151716	0.151794	0.222656	0.0988027	0.154539	0.137016	0.364693
RFX5	0.184837	0.196691	0.18672	0.194199	0.136557	0.174996	0.152255	0.0420891	0.0502107	0.212336	0.0083636	0.158881	0.0749131	0.154058
RP11-126K1.6	0.118269	0.102255	0.0620926	0.1539	0.108202	0.108072	0.0588313	0.0190741	0.0192128	0.0820016	0.10244	0.158333	0	0.0565313
SELENBP1	0.015	0.00839686	0.0244643	0.0113262	0.0167556	0.145216	0.0139482	0.0103188	0.00303875	0.0119798	0.0499794	0.0241866	0	0
PSMB4	0.690758	0.821242	0.839923	0.641741	0.490173	0.72779	0.681772	0.707653	0.528136	0.631967	0.716367	0.725709	0.439163	0.764983
POGZ	0.194772	0.307619	0.316303	0.25458	0.195277	0.344022	0.170561	0.23604	0.114566	0.321812	0.178984	0.0857097	0.531288	0.61076
CGN	0.0169826	0.00760297	0.000829417	0.00536466	0.00570216	0.0145596	0.0017168	0.00619057	0	0.00442061	0	0.0195316	0	0
TUFT1	0.0261417	0.0116583	0.0109676	0.00705119	0.0335761	0.0327824	0.0121532	0.025149	0.0335941	0.0143979	0.0285417	0.0120584	0	0
SNX27	0.331327	0.294656	0.302613	0.28908	0.243112	0.301795	0.309682	0.255828	0.540893	0.284705	0.501087	0.132786	0.293407	0
RIIAD1	0.00161238	0.00415791	0.0041908	0.00258197	0.0101161	0	0.00213506	0	0.0122512	0	0.0304236	0	0	0
RP11-98D18.15	0.00328972	0.00521438	0	0	0.00262877	0	0.00193694	0	0	0.00264688	0	0	0	0
MRPL9	0.339462	0.462561	0.306962	0.510945	0.396306	0.33716	0.421014	0.362009	0.415343	0.348967	0.338973	0.415697	0.354702	0.360069
OAZ3	0.0299928	0.0203469	0.033755	0.0105048	0.0251259	0.0404856	0.0246812	0.030118	0.00259091	0.00698408	0	0.0258114	0	0.102883
TDRKH	0.0212504	0.0270807	0.0278716	0.0120814	0.0421588	0.0326398	0.0246442	0.0026374	0.0111273	0.021738	0	0	0	0
RP11-98D18.9	0	0.00869981	0.0113038	0.00347087	0	0.0159833	0.00724897	0.00573548	0.00351988	0.00822255	0	0	0	0
RORC	0.0118012	0.00890898	0.000687296	0.00541384	0.0205594	0.0130605	0	0.0111093	0.00902366	0	0	0	0	0
C2CD4D	0	0	0.00139323	0	0	0.000914342	0	0.00418497	0.00538815	0.0178876	0	0	0	0
THEM4	0.0836236	0.124629	0.0914462	0.12814	0.0674105	0.168339	0.0801679	0.0739967	0.0931158	0.165826	0.0368015	0.235959	0	0.267983
S100A10	8.63029	8.37802	13.0323	10.1653	5.81469	9.30017	9.5848	26.2465	3.76362	8.80951	11.8534	8.46495	3.50026	2.1295
NBPF18P	0.00278048	0.00510044	0	0	0.00063092	0	0	0	0	0	0	0	0	0
S100A11	23.8227	21.1651	32.505	21.0796	21.4433	33.5321	25.0824	35.063	27.8836	19.0488	22.4622	7.72345	12.7624	3.89763
TCHH	0.058596	0.0283391	0.0244989	0.00707158	0.459012	0.019462	0.145766	0.0268008	0.0299713	0.100109	0.041274	0.0498351	0	0
FLG-AS1	0.00365309	0	0.00152845	0	0	0	0	0	0	0.00812382	0	0	0	0
RP11-107M16.2	0.00363583	0	0	0.0043766	0.00223554	0.00753069	0	0.00295573	0	0	0	0	0	0
LOR	0	0	0	0	0	0	0	0	0	0.0146561	0	0.0143781	0	0
S100A9	7.53379	6.15189	7.36377	7.39089	0.918568	4.21829	19.1237	7.70742	3.97981	6.72539	64.1587	0.335649	1.11764	0.239151
S100A12	0.0498413	0.0652985	0.0124941	0.107925	0.0324711	0.0261994	0.175214	0.0151589	0.0216008	0.257948	7.51751	0	0	0
S100A8	1.71771	2.15817	1.53813	2.61516	0.641222	2.01723	10.2887	3.10288	0.897181	3.20724	62.0625	0.20089	0.846087	0.0867483
S100A6	11.8943	14.2823	21.3002	18.0003	17.8967	22.0797	13.3935	34.7933	36.9736	16.7824	41.54	5.95561	27.0346	12.1945
S100A5	0.00351706	0.0128149	0.00442948	0.0261567	0.0169575	0.003088	0.00805962	0.00842412	0.00350169	0.0179845	0	0	0	0
S100A4	21.5628	25.4455	20.9781	26.2278	22.5246	21.6452	15.1982	17.1256	4.72468	21.1505	46.989	1.24556	21.04	7.70535
S100A3	0.00273183	0.00410024	0.00716116	0	0	0	0	0.00130186	0.00485071	0.00147434	0	0	0	0
S100A2	0.0960574	0.0985377	0.102812	0.0899331	0.0979457	0.215883	0.043813	0.196169	0.136017	0.133768	0.0650793	0.0545678	0.0749131	0.0845059
S100A16	0.0623948	0.0280941	0.0653947	0.0336847	0.0909286	0.0589287	0.0338193	0.0905742	0.0704673	0.0561089	0.0359286	0	0.12948	0.164805
S100A14	0.0157666	0.00486819	0.0260759	0.00672181	0.0278842	0.009827	0.0151796	0.0240252	0.0168148	0.0392812	0	0	0	0
S100A13	0.23365	0.186404	0.295954	0.189987	0.282792	0.406812	0.175083	0.280118	0.937661	0.359904	0.102629	0.0586467	0.243301	0.090712
S100A1	0.0122491	0.0242259	0.0275467	0.0186625	0.0276903	0.0249281	0	0.0164934	0.0405621	0.0114625	0.0249955	0	0.111428	0
RP1-178F15.4	0.00337332	0.00260152	0	0.00494718	0	0.00135767	0.00675308	0	0.00358169	0	0	0.0243952	0	0
CHTOP	0.514071	0.613186	0.408936	0.461551	0.265269	0.411233	0.416214	0.360331	0.256971	0.496154	0.273779	0.23906	0.532659	0.428607
SNAPIN	0.430182	0.58684	0.498545	0.388101	0.269702	0.558689	0.490571	0.388217	0.257217	0.41656	0.300843	0.147003	0.279904	0.163699
ILF2	0.611685	1.2177	0.639402	0.773665	0.900723	0.69793	0.699685	0.527013	0.677143	0.811277	0.564388	0.854338	1.75576	0.984823
NPR1	0.0104161	0.00676146	0.00157312	0.00404673	0	0	0.00185673	0	0.00446275	0	0	0.0369965	0	0
INTS3	0.101706	0.116209	0.114877	0.0939575	0.0541739	0.171487	0.0721584	0.141185	0.0586647	0.165873	0.168056	0.148422	0	0.320864
SLC27A3	0.0746118	0.104507	0.133871	0.0867827	0.0668716	0.108144	0.0904087	0.0997783	0.203234	0.17917	0.250778	0.155431	0	0.0565313
GATAD2B	0.126775	0.169895	0.159894	0.179997	0.104932	0.154813	0.135164	0.0932299	0.141197	0.206538	0.202696	0.253485	0	0.32525
DENND4B	0.110236	0.150811	0.20253	0.119887	0.0969982	0.146531	0.121634	0.175949	0.0311896	0.172745	0.147524	0.0945936	0.072704	0.107699
CRTC2	0.0925536	0.0805102	0.098011	0.116017	0.0537292	0.0681007	0.113735	0.144983	0.046326	0.0913372	0.15109	0.0316968	0	0.281786
SLC39A1	0.807859	0.731974	0.780311	0.500404	0.538877	0.632475	0.973448	0.625433	0.516044	0.659852	0.264424	0.217428	0.487649	0.227708
RP11-422P24.10	0	0.000628207	0	0.011862	0	0	0.00215227	0	0	0	0	0	0	0
CREB3L4	0.056194	0.0595647	0.0378081	0.0337518	0.0443655	0.0971455	0.0341156	0.0375052	0.00488511	0.030415	0.0192014	0.0794051	0.0535699	0.109791
JTB	1.63703	1.94829	1.73805	1.57767	1.4026	1.65855	1.79586	1.53687	2.02536	1.91231	1.27803	1.13537	1.43495	2.65243
RP11-422P24.11	0.00737273	0.00398006	0.0171019	0.00765755	0.0136546	0.00179678	0.00416968	0	0.0095132	0.0206622	0	0	0	0
RAB13	0.604085	0.508228	1.04568	0.346802	0.270786	0.679946	1.32072	2.35827	1.13661	0.447394	0.465786	0.315238	0.558801	0.247885
RPS27	38.792	30.9711	36.1596	49.9969	55.3117	39.0787	33.1329	47.6385	49.4825	52.1542	72.9815	65.0262	72.9784	89.4913
NUP210L	0	0	0	0	0.00464295	0.006236	0	0.00283515	0	0	0	0	0	0
TPM3	2.9756	4.50515	3.35541	3.88244	3.73258	3.16222	5.39948	2.34144	1.66406	3.97334	3.89285	4.77005	1.73784	2.00542
C1orf189	0	0.00129503	0	0	0	0	0	0	0.00421898	0	0	0	0	0
C1orf43	1.49552	1.30658	1.11839	1.18916	1.18501	1.04653	1.4924	1.25212	1.89324	1.10053	0.757247	0.812076	0.802628	1.07995
UBAP2L	0.20385	0.284972	0.2601	0.196265	0.159636	0.192874	0.27061	0.203648	0.146394	0.29451	0.114978	0.229434	0	0.211409
HAX1	0.686631	0.881294	0.63767	0.655416	0.777482	0.496619	0.600528	0.747516	0.734267	0.690707	0.505891	0.573314	1.10143	0.756028
ATP8B2	0.00573981	0.00269849	0.0102543	0.00174542	0.00443823	0	0.0168465	0.016205	0.00987261	0.021151	0.0240743	0.0535933	0	0
RP11-350G8.5	0.0165104	0.00553171	0.0201837	0.00247138	0.0105759	0.0142574	0.0117577	0.0160322	0.0037239	0	0	0	0.0836344	0.0565313
IL6R	0.221218	0.25659	0.242443	0.283768	0.237256	0.267246	0.239125	0.423095	0.181976	0.26902	0.25519	0.358189	0.0749131	0
SHE	0	0.000571302	0.00411105	0	0.00312463	0	0.0021663	0.00820547	0	0	0	0.0333691	0.170486	0
RP11-350G8.9	0.00155408	0.00179077	0	0.0021714	0	0.00244254	0.000974761	0	0	0	0	0	0	0
UBE2Q1	0.188622	0.292831	0.206058	0.221746	0.109678	0.214857	0.271871	0.21959	0.173526	0.244082	0.132908	0.366494	0.293312	0.73938
ADAR	0.64988	0.754586	0.769312	0.522021	0.309996	0.747473	0.71945	0.602411	0.338325	0.825362	0.400691	0.30308	0.190586	0.546633
KCNN3	0.00306528	0.00998524	0.000545849	0	0.0133561	0.00146344	0.00624868	0.0103212	0.00348745	0	0	0	0	0
PMVK	0.579873	0.843779	0.661234	0.446765	0.549888	0.674053	0.795028	0.280706	0.411794	0.577326	0.331836	0.3084	0.303061	0.244831
RP11-307C12.13	0.0181966	0.00429499	0.0442538	0.00264958	0.0355754	0.0123156	0.0238086	0.0161266	0.00880855	0.0343792	0.0240743	0	0	0.183773
PBXIP1	0.140755	0.11905	0.19682	0.082548	0.087954	0.191061	0.185789	0.111967	0.0950056	0.304704	0.122698	0.0780633	0.216002	0.320001
PYGO2	0.039657	0.0530975	0.04415	0.0491346	0.0164489	0.054858	0.0462662	0.0204832	0.0121498	0.084916	0.0407579	0.0384633	0	0.0477102
RP11-307C12.12	0.0138761	0.0119795	0.0115881	0.00682349	0.00658764	0.0097029	0.012353	0.0118132	0.0436813	0.0182994	0.0083636	0.00841057	0	0.0729868
SHC1	0.0915725	0.126583	0.13122	0.0761595	0.0995533	0.153592	0.077691	0.112177	0.065322	0.159187	0.0498964	0.0991996	0.376873	0.154606
CKS1B	0.380106	4.23097	0.274719	0.515256	0.481584	0.466635	0.315459	0.395748	0.306913	0.524334	0.261641	0.347051	0.282844	0.499345
FLAD1	0.161598	0.204271	0.171261	0.196259	0.0979549	0.216234	0.151294	0.0847869	0.153724	0.132438	0.113105	0.0987099	0.0836344	0.0482074
ZBTB7B	0.086934	0.0998131	0.102773	0.0759057	0.0534594	0.161955	0.100326	0.0980214	0.0817177	0.0848366	0.110085	0.0357837	0.190586	0.132713
DCST2	0.00721636	0.00118697	0.00319104	0.00741701	0	0.00162958	0	0.00453392	0	0.00465323	0	0	0	0
RP11-307C12.11	0.00202564	0.00940935	0.00247492	0.00185767	0.00244442	0	0.00177265	0	0.0112993	0.00988475	0	0	0	0
ADAM15	0.179602	0.288694	0.201253	0.173526	0.240961	0.17921	0.154355	0.113605	0.0951292	0.182094	0.180269	0.2626	0	0
EFNA4	0.0472563	0.0638663	0.0675863	0.0769775	0.0465621	0.0660788	0.0736165	0.0937687	0.0189468	0.0449038	0.0353346	0.0223599	0	0.0816187
EFNA3	0.00418758	0.0086083	0.00876084	0.0083312	0.0109502	0.0224003	0.011177	0.0562417	0.00556735	0.0246003	0	0	0	0
EFNA1	0.0554115	0.0267069	0.0148284	0.0489227	0.0516395	0.0571403	0.00984877	0.0095938	0.0421342	0.0379453	0.0184015	0	0	0
SLC50A1	0.267821	0.316109	0.318697	0.295699	0.316181	0.308346	0.387582	0.233552	0.34812	0.291081	0.168973	0.255282	0.51763	0.343839
DPM3	0.77142	0.65807	0.692944	0.657709	0.55868	0.90701	0.570257	0.532596	0.692104	0.578415	0.573681	0.37332	0.72114	0.562721
KRTCAP2	1.28915	1.56284	1.75354	1.21281	1.12948	1.61503	0.955603	1.37986	1.46089	1.31232	1.1085	0.707828	1.08174	1.91368
TRIM46	0.0040105	0.00367513	0.00822601	0.00204026	0.0026307	0	0.00698021	0	0	0.00185257	0	0.0319501	0	0
MUC1	0.351062	0.241203	0.045768	0.286066	0.215992	0.339164	0.0805265	0.0857854	0.204405	0.188536	0.343001	0.143261	0.0535699	0.274975
THBS3	0.031242	0.0177921	0.0134589	0.0105738	0.0134966	0.0205171	0.020901	0.0357745	0.041088	0.0256206	0.0153261	0	0	0
RP11-263K19.4	0.00961813	0.00589258	0.00373656	0.004897	0.00712277	0.00159965	0	0	0.0105101	0	0.0267431	0	0	0
MTX1	0.316189	0.416003	0.464729	0.305647	0.187619	0.43786	0.417085	0.353848	0.423759	0.328342	0.342535	0.129671	0.393584	0.133956
GBA	0.297625	0.362059	0.55486	0.166866	0.214947	0.362873	0.405148	0.33794	0.292186	0.29251	0.0927464	0.0483757	0.368213	0
FAM189B	0.0609998	0.0780214	0.0754557	0.0551495	0.0551983	0.0559591	0.0731543	0.0307917	0.031004	0.0370235	0	0.0781111	0.0749131	0
SCAMP3	0.305187	0.286666	0.317409	0.250131	0.210341	0.305188	0.288395	0.241564	0.351345	0.280855	0.0978407	0.125955	0.157328	0.193595
CLK2	0.0524169	0.0581104	0.0586513	0.0774446	0.0333696	0.0706645	0.070459	0.0663204	0.0473563	0.0432334	0.0354185	0.038793	0	0.122512
HCN3	0.00518535	0.0004518	0.00902747	0.00399031	0	0.0107511	0.00480336	0.00216313	0	0	0	0	0	0
FDPS	0.467958	0.957503	0.48202	0.5503	0.538297	0.658539	0.448024	0.345565	0.410498	0.648592	0.312201	0.541792	0.59869	0.263474
RUSC1-AS1	0.00628479	0.0098272	0.00369796	0.0067606	0.0101689	0.000717056	0.00590289	0.00135541	0	0.00805807	0.0668835	0.0160537	0	0
RUSC1	0.102164	0.215423	0.119464	0.133697	0.0957677	0.140354	0.138797	0.0853228	0.101202	0.10503	0.024793	0.318482	0.308946	0
ASH1L	0.374188	0.395852	0.31923	0.402115	0.286817	0.526887	0.372468	0.366919	0.205695	0.465185	0.229243	0.442986	0.704982	0.322717
MSTO1	0.0271688	0.0563839	0.0638256	0.0250826	0.0213968	0.0794499	0.0481502	0.0228713	0.00822262	0.0493429	0	0.084759	0.0535699	0.164231
YY1AP1	0.119779	0.159372	0.181015	0.111414	0.121055	0.151414	0.17534	0.237281	0.161043	0.149157	0.0594466	0.133645	0	0
DAP3	0.54376	0.525762	0.527696	0.609961	0.502353	0.435655	0.622786	0.524248	0.37515	0.568598	0.507102	0.521752	0.262165	0.842136
GON4L	0.224321	0.280048	0.3153	0.192497	0.126781	0.231638	0.249289	0.194052	0.0674937	0.307468	0.131727	0.188379	0.306927	0.39231
SYT11	0.193541	0.212705	0.207739	0.136591	0.109516	0.125016	0.184488	0.168594	0.0248733	0.208898	0.0398312	0.0793833	0	0
RIT1	0.385717	0.243354	0.391569	0.329156	0.53387	0.376493	0.349016	0.576325	0.450396	0.331189	0.735886	0.167027	0.143728	0.300203
KIAA0907	0.119263	0.152825	0.134569	0.0996573	0.176495	0.217253	0.103943	0.200249	0.18248	0.252859	0.130704	0.245522	0.206457	0.210073
ARHGEF2	0.230928	0.257987	0.387543	0.209375	0.187815	0.369737	0.22788	0.452202	0.241309	0.26856	0.241086	0.456041	0.319125	0.0886039
RP11-336K24.12	0.00158271	0.00113558	0	0.000821846	0	0	0.0035913	0.0235806	0.0285185	0	0	0	0	0
SSR2	2.26736	2.42204	2.08114	2.04829	1.82405	2.57723	2.5486	2.32948	1.69377	2.66198	1.69658	2.09446	3.18227	2.69783
UBQLN4	0.0699129	0.0649232	0.0727941	0.0525211	0.054398	0.0676082	0.0484459	0.0683229	0.06144	0.0649723	0.0343411	0.0350451	0.170486	0.0408938
LAMTOR2	2.42104	2.40041	2.64417	2.30959	1.87746	2.62185	2.39714	1.50096	1.44656	1.85894	1.41274	0.907556	1.289	1.16224
RAB25	0.0408318	0.0286965	0.0602841	0.0324605	0.0372635	0.135792	0.0179995	0.047149	0.0289899	0.0518582	0.0272157	0.025827	0	0.187364
MEX3A	0.00435155	0.00238635	0.00833425	0.00657937	0	0.0309855	0.0146397	0.0208754	0	0.00442061	0	0.00811528	0	0
LMNA	0.443787	0.861403	1.30443	1.26991	4.0267	0.968074	0.800892	1.44371	1.26993	1.36303	0.998315	1.32446	34.6821	0.367911
SEMA4A	0.206401	0.149143	0.300946	0.243747	0.238144	0.183422	0.253535	0.193627	0.100988	0.272469	0.113493	0.363788	0.274221	0.327635
SLC25A44	0.0529265	0.0519509	0.0664659	0.0272728	0.0492237	0.0443246	0.058284	0.0454826	0.0456173	0.0700554	0.0845255	0.0332776	0.0832667	0.0482074
PMF1	0.329481	0.570704	0.447436	0.354472	0.495022	0.391794	0.501658	0.373731	0.504532	0.551595	0.627815	0.4011	0.894121	0.539145
BGLAP	0.00259153	0.000879484	0.00762875	0.00396464	0	0.00539521	0	0.00205824	0.0220133	0	0	0	0	0
PAQR6	0.00124469	0.00880941	0.0040858	0.00776837	0.00470926	0.0048761	0.0140086	0.00506591	0.0159119	0.0353203	0	0	0.105405	0
SMG5	0.0684916	0.0742701	0.0976538	0.048859	0.0649065	0.0820437	0.075242	0.0534449	0.0765593	0.0744961	0.0405767	0.024169	0.0749131	0.0565313
TMEM79	0.0174835	0.0249019	0.0205587	0.0286124	0.0116435	0.0202232	0.0078104	0.0246957	0.0155305	0.020567	0	0.0417736	0	0
C1orf85	0.407041	0.252789	0.688044	0.180419	0.254764	0.517756	0.496508	0.444397	0.446982	0.311627	0.0721776	0.033994	0.072704	0.203601
CCT3	1.0472	1.37036	1.12926	1.11336	1.06302	1.239	1.29335	0.709717	0.644336	1.32844	0.50508	0.803119	1.37216	1.30199
TSACC	0.00324483	0	0.00161476	0	0.00492584	0.0082825	0.00287591	0.00238066	0.0118987	0	0	0	0	0
C1orf61	0.00613492	0	0.00187549	0.00202303	0.0041799	0	0	0.00518991	0	0.0156981	0	0	0	0
RP11-98G7.1	0.00256366	0.00427839	0.0037721	0.00368742	0.0075543	0	0.00535629	0.00665164	0.00521753	0.00969927	0	0	0	0
MEF2D	0.154446	0.111554	0.200605	0.156252	0.235511	0.10572	0.126085	0.175585	0.086791	0.219337	0.06651	0.108252	0	0.154618
RP11-284F21.8	0	0	0.00154426	0	0	0.00501609	0	0.00200968	0.00552199	0	0	0	0	0
IQGAP3	0.0199811	0.229973	0.024616	0.0214685	0.00778615	0.00988701	0.0113887	0.0260816	0	0.016016	0	0	0	0
APOA1BP	0.430195	0.546954	0.540438	0.367804	0.399807	0.445298	0.525559	0.331716	0.573835	0.495143	0.218462	0.443018	0.684867	0.456882
GPATCH4	0.213014	0.315705	0.189996	0.264152	0.201864	0.398657	0.37285	0.105013	0.0937959	0.254765	0.141943	0.169796	0.125054	0.0482074
BCAN	0.0101004	0.00286855	0.00865308	0.00174542	0.00440159	0	0.00584597	0.0116199	0.00401	0.00457561	0	0	0	0
RP11-284F21.10	0	0.00366034	0.00240196	0	0	0	0	0.00205477	0	0	0	0	0	0
NES	0.0223608	0.0316269	0.0330869	0.00271808	0	0.0248722	0.0309772	0.0488591	0	0.00955345	0	0.0160537	0	0
RP11-66D17.3	0	0	0	0	0.00352004	0	0	0.00207557	0	0.00674234	0	0	0	0
CRABP2	0.013371	0.0394203	0.148802	0.0152874	0.0410153	0.0261424	0.112609	0.184784	0.131981	0.0465608	0.0264631	0.0240544	0	0
ISG20L2	0.188679	0.238394	0.216087	0.172259	0.239461	0.191602	0.255319	0.104459	0.177503	0.318797	0.251201	0.196148	0	0.38042
RRNAD1	0.0905711	0.117137	0.0830242	0.0916591	0.0729175	0.0796407	0.0657	0.0929823	0.118535	0.11245	0.0843125	0.0646994	0	0
MRPL24	0.447861	0.543223	0.456041	0.499492	0.443398	0.550053	0.409861	0.291804	0.44418	0.362843	0.300382	0.167407	0.443165	0.344504
HDGF	0.442739	0.724043	0.379294	0.55136	0.246779	0.496916	0.40343	0.335544	0.274881	0.390364	0.267795	0.371419	0.162218	0.691802
PRCC	0.26159	0.331168	0.252514	0.251359	0.171811	0.202201	0.281204	0.212986	0.19531	0.304911	0.145662	0.127677	0.481433	0.148593
SH2D2A	0.0392893	0.0457779	0.0859315	0.0670401	0.164512	0.018078	0.059795	0.0500091	0.0967646	0.507509	0.0636692	0.0783159	0.194694	0.0482074
NTRK1	0.00117912	0	0	0	0	0	0	0	0	0.0300467	0	0	0.838027	0
PEAR1	0	0.00228903	0.00102353	0	0	0	0.00177907	0	0.00488511	0	0	0	0	0
LRRC71	0.00950172	0.00612918	0.000617958	0.0219024	0.0100444	0	0	0	0.014013	0.0135371	0	0	0	0
ARHGEF11	0.0439936	0.0444377	0.0928525	0.0235378	0.0255814	0.0693193	0.0663844	0.0731609	0.0626091	0.0412107	0	0	0	0
ETV3L	0	0.00126621	0.00126482	0	0	0	0	0	0	0.00489248	0	0	0	0
ETV3	0.129552	0.126543	0.0984184	0.214777	0.279246	0.0514558	0.105049	0.104728	0.154459	0.244788	0.105745	0.508733	0.19565	0.487185
RP11-71G12.1	0	0	0	0.00301163	0	0	0	0	0	0	0	0	0	0.190138
FCRL5	0.00394199	0	0.00938051	0	0	0.0030552	0	0.004979	0	0	0	0	0	0
FCRL4	0	0.00346584	0	0	0	0	0	0	0	0.0150245	0	0	0	0
FCRL3	0	0.000902626	0.00303105	0.0011378	0.00269028	0.0095218	0	0	0	0.0224055	0.0428284	0	0	0
FCRL2	0.00347573	0.0214748	0.00269987	0.0175903	0.0100045	0.0292904	0	0.00284327	0	0.0073741	0	0	0	0
FCRL1	0.00103845	0.024137	0.00893129	0.0283739	0.0371232	0.0182243	0	0.00194124	0	0.00320765	0	0	0	0
CD5L	0	0.00690826	0.00192841	0.00220051	0	0.00234594	0	0	0.00876217	0.00164626	0	0	0	0
KIRREL	0	0.00279951	0.000647379	0.00174542	0.00415702	0	0.00226109	0	0	0	0	0	0	0
CD1D	0.373587	0.391234	0.110405	0.649763	0.239909	0.261619	0.15654	0.0178792	0.0149347	0.227576	0.272896	0.45354	0	0
RP11-404O13.5	0.135178	0.378202	0.0266918	0.841513	0.495547	0.302356	0.140297	0.00130186	0.00384417	0.2213	0	0.0368004	0	0
CD1A	0.035092	0.94864	0.00422486	2.63851	0.0980174	0.322266	0.0244352	0.00130186	0	0.230518	0	0	0	0
CD1C	0.151802	1.2918	0.0232686	3.50263	0.999483	0.524338	0.0531587	0.0229978	0.0249238	0.501586	0.275104	0.14709	0.0978091	0
CD1B	0.0195658	0.0850382	0.00633439	0.19937	0.0723836	0.100804	0.00711707	0	0	0.0499874	0	0.110526	0	0
CD1E	0.117239	0.796621	0.0203737	3.4106	1.09085	0.889419	0.0586175	0.00270527	0.0150197	0.618867	0	0.653535	0	0
MNDA	4.05541	4.81159	2.69978	4.48786	2.20818	4.30754	3.83865	0.512562	0.699281	2.35266	5.4812	2.08969	0.209866	0.0565313
PYHIN1	0.00648106	0.0185087	0.0428666	0.00850038	0.0134978	0.0166941	0.0218263	0.0617202	0.0555598	0.565442	0.0261818	0.102086	0	0.0482074
IFI16	2.47118	3.72461	2.46653	1.86973	1.53959	2.53138	2.81904	1.21457	1.17179	2.62174	0.993594	2.06455	0.582257	1.83695
AIM2	0.0998047	0.0864201	0.275158	0.0725053	0.0183077	0.108658	0.216918	0.0661342	0.0190352	0.127278	0.0444062	0.197537	0	0
DARC	0.00127696	0.00192337	0.0052233	0.00462642	0.0194162	0	0.0623084	0.0147786	0.0146578	0.0266862	0	0	0	0
FCER1A	0.246295	1.22061	0.0210974	6.74927	1.17719	0.481573	0.106937	0.00405791	0.0123147	1.03035	0.0782056	0	1.08719	1.00909
DUSP23	1.09514	1.06232	1.02686	0.890338	0.760393	0.974198	1.13638	0.94504	1.45048	0.764991	0.647572	0.68604	0.613736	0.442057
FCRL6	0.00072602	0.00284346	0.00386981	0.00882173	0.0148131	0.00139731	0.0078801	0.00835644	0.0111962	0.0528013	0.0139658	0.0743266	0	0
SLAMF8	0.684668	0.380814	0.824459	0.534543	0.353098	0.598775	0.713854	0.284515	0.311334	0.462179	0.0415811	0.561196	0	0.0788793
C1orf204	0.00716266	0.00277432	0.00321228	0.00400548	0	0.00262035	0.00504653	0.0133022	0.0401933	0	0	0	0	0
VSIG8	0.00801648	0.00481124	0.0154818	0.00870094	0.023429	0.00659196	0.00226957	0.0389079	0	0.0255182	0.0266573	0	0	0
CCDC19	0.0105223	0.0137102	0.00163755	0.0194881	0.033259	0.00701944	0.00454916	0.00104746	0.0174988	0.0181282	0.0354617	0	0.0820856	0
AL590560.1	0.00139691	0.00185292	0.000877943	0	0	0	0	0.00124168	0	0.00336611	0	0	0	0
TAGLN2	2.76763	4.09806	2.9485	3.4829	2.20345	2.02736	2.39527	4.61774	2.18547	3.02122	2.35516	4.60749	6.65599	4.64776
IGSF9	0.00579745	0.00172079	0.00160754	0.00419174	0.00759509	0	0.0018385	0.0361666	0.00516114	0	0	0	0	0
SLAMF9	0.0789444	0.0727396	0.0918637	0.133334	0.0281223	0.0584237	0.173033	2.6937	0.0836669	0.162894	0.0505264	0.0925217	0.0365145	0
LINC01133	0.0308104	0.0125716	0	0.00916169	0	0	0	0	0	0.00393266	0	0	0	0
PIGM	0.044703	0.0662426	0.0667304	0.0723387	0.0476058	0.0904483	0.041453	0.0522984	0.0625812	0.0559036	0.0132906	0.0160537	0	0.17072
KCNJ10	0.00157337	0.00129077	0.0333699	0.00243924	0	0.0162221	0	0.0212632	0	0.00252316	0	0	0	0
IGSF8	0.110214	0.0666714	0.121953	0.106015	0.117159	0.110493	0.0930072	0.113248	0.118438	0.130892	0.0695416	0.125816	0	0.107699
ATP1A2	0	0.00224635	0	0.00304347	0	0	0	0	0	0	0	0	0	0
ATP1A4	0	0.00237055	0.00131208	0.0112843	0	0	0	0	0.00637978	0.00577109	0	0	0	0
RP11-536C5.7	0.00227507	0.00444944	0	0.0040135	0	0	0	0	0	0.00254924	0	0	0	0
PEA15	1.02931	1.46987	0.906283	1.9778	1.12428	1.2235	1.2691	0.966205	0.226558	1.03216	0.28723	0.673684	0.120149	0.586998
DCAF8	0.14345	0.170526	0.189294	0.188334	0.133509	0.220649	0.137279	0.0927444	0.196204	0.187282	0.164351	0.0446556	0.1186	0.0810708
RP11-574F21.2	0	0.00171341	0.000617958	0.00158777	0	0.00539671	0	0.0053893	0.00954494	0.00309983	0	0	0	0
PEX19	0.120905	0.119188	0.12477	0.0896742	0.0434734	0.131079	0.0859086	0.0959563	0.180354	0.0900767	0.211715	0.0810523	0.06977	0.398882
COPA	0.495361	0.478206	0.51306	0.451471	0.386081	0.517597	0.508707	0.447579	0.314986	0.473033	0.409117	0.493398	0.971282	0.830649
NCSTN	0.396912	0.32846	0.523584	0.282367	0.267918	0.403944	0.326524	0.378327	0.410446	0.361896	0.419918	0.150347	0.072704	0.339754
NHLH1	0.000622889	0.00363314	0.00914239	0	0	0	0.00157689	0	0	0	0	0	0	0
VANGL2	0.00728357	0.00264637	0.00104384	0.00509698	0.000971496	0.0154477	0.001424	0.00254011	0.00153587	0	0	0.025827	0	0
SLAMF6	0.00340361	0.00795384	0.0451105	0.0162953	0.00799223	0.0132214	0.0247438	0.0178812	0.00358169	0.158082	0	0	0	0
CD84	0.895642	0.691966	1.75038	0.429436	0.428423	1.24684	1.22447	0.916472	0.328579	0.895569	0.190341	0.661655	0.209541	0.167544
SLAMF1	0.00564408	0.00813139	0.0233229	0.00108363	0.0140723	0.00696511	0.0441685	0.0270306	0.00540131	0.154096	0.0268613	0	0	0.0816187
RP11-404F10.2	0	0	0.000734009	0	0	0.00296315	0	0	0	0.0117954	0	0	0	0
CD48	1.21813	1.14339	1.144	1.75658	1.05615	0.930894	1.36261	1.72473	1.78008	1.75168	2.56831	1.31529	1.00591	0.749714
SLAMF7	0.190436	0.101223	0.414777	0.131064	0.0829783	0.173118	0.222646	0.318241	0.337343	0.204376	0.0304236	1.03187	0	1.22253
LY9	0.0314935	0.00529884	0.0432145	0.010879	0.0619761	0.00716913	0.0184708	0.11668	0.101166	0.136701	0	0	0	0.223258
CD244	0.0285083	0.0244442	0.0329524	0.0459563	0.0457998	0.0176647	0.0250017	0.0276984	0.00920856	0.116389	0.148605	0.0372629	0	0
ITLN1	0.00840301	0.00465499	0.0456032	0	0	0.0124013	0.00162465	0.0214395	0.00411607	0.00504632	0	0	0	0
F11R	0.211763	0.16242	0.256203	0.155912	0.145686	0.155105	0.119421	0.259872	0.157622	0.127553	0	0.480361	0.233702	0.0810708
TSTD1	0.543601	0.514891	0.494834	0.429567	0.407924	0.465835	0.40985	0.72099	1.32601	0.788894	0.182735	0.793648	1.38599	0.584586
USF1	0.0344648	0.0395153	0.0434092	0.0189502	0.0149758	0.0241466	0.0418144	0.0286203	0	0.0104824	0	0.0243952	0	0.0810708
ARHGAP30	0.50899	0.501641	0.67002	0.468426	0.390381	0.573536	0.610235	0.40328	0.214676	0.799004	0.299476	0.499302	0.306592	0.547651
PVRL4	0.00600532	0.00758156	0.0144978	0.0055167	0	0.0286571	0.0246477	0.123187	0.0264734	0.0304219	0.0083636	0	0.170486	0
RP11-544M22.8	0	0	0	0	0	0	0	0.00565097	0.0107597	0	0	0	0	0
KLHDC9	0.0112717	0.0165344	0.00744801	0.0310308	0.0395336	0.0318298	0.00553101	0.0110467	0.0210869	0.0064819	0.0240743	0	0	0.0845059
PFDN2	1.36115	1.99501	1.35125	1.94833	2.0639	1.6455	1.17366	1.48681	1.73022	1.43518	1.40707	1.62673	1.80375	2.14601
NIT1	0.212578	0.177237	0.192208	0.185476	0.103028	0.186875	0.130962	0.133653	0.204971	0.185073	0.137392	0.217039	0.104743	0.259757
DEDD	0.121902	0.103217	0.132028	0.148455	0.116218	0.091884	0.122812	0.142217	0.136888	0.0798215	0.0971391	0.0918893	0.072704	0
UFC1	1.4681	1.32439	1.44476	1.53327	1.44722	1.5166	1.42492	1.09468	1.42348	1.29931	1.18848	1.05606	1.24495	1.67605
RP11-297K8.2	0.00257417	0.00204411	0.000704936	0	0	0	0.00292428	0	0	0	0	0	0	0
USP21	0.0210834	0.0186936	0.0133382	0.020133	0.0110229	0.00996635	0.0107005	0.0201642	0.00568794	0.0505333	0	0	0	0
PPOX	0.0946075	0.0774313	0.0574775	0.0509758	0.0720613	0.0699197	0.0312717	0.0462958	0.072409	0.0940912	0.0557272	0.064278	0	0.288095
B4GALT3	0.191797	0.169138	0.185127	0.157029	0.159036	0.0956659	0.15736	0.133553	0.199177	0.218196	0.0856845	0.0918698	0.558116	0.194599
ADAMTS4	0	0.00559806	0.00616235	0	0.0113965	0	0.013459	0.00513662	0	0.00754594	0	0	0	0
NDUFS2	0.794814	0.755233	0.769706	0.757389	0.620836	0.865781	0.761366	0.555899	0.569875	0.573941	0.425094	0.561385	0.244628	0.455469
FCER1G	32.8401	20.9832	27.7976	23.7352	23.1032	27.4232	27.9697	22.3134	9.4537	17.6976	25.5629	2.30843	14.7988	11.3519
TOMM40L	0.0507356	0.0672555	0.0743841	0.0323455	0.0689127	0.0661048	0.0548527	0.0549734	0.0386101	0.0375848	0.148814	0.0306076	0.0365145	0.0729868
NR1I3	0.00312524	0.00528944	0.00430847	0	0.007674	0.00130815	0	0.00217397	0	0.00830587	0.112903	0	0	0
PCP4L1	0.00741457	0	0	0.00253728	0	0	0	0	0	0	0	0	0	0
MPZ	0.0157664	0.0238931	0.0141788	0.0266168	0.00837418	0.0134935	0.0188136	0.0168648	0	0.0128525	0.0256573	0	0	0.163699
SDHC	0.987294	1.01826	1.20489	0.906116	0.916022	1.24685	1.0606	0.751725	1.44143	0.879075	0.734733	0.540457	0.721332	0.710202
C1orf192	0.0413258	0.0352509	0.00241615	0.0236726	0.0666959	0	0.0239924	0	0.0630137	0.0287077	0.0224434	0.0165968	0.474217	0
RP11-122G18.5	0.00288419	0.0053691	0.0105699	0.00981942	0	0.00162958	0.0015986	0.00399914	0	0.00427372	0	0	0	0
RP11-122G18.8	0	0	0.00398144	0	0	0.00467174	0	0.00635331	0.00369379	0	0	0	0	0
FCGR2A	6.18527	3.25832	6.34806	2.21602	3.49645	2.59002	5.27602	3.77951	0.277143	3.14598	1.01621	0.0749477	0.68518	0.0788793
HSPA6	2.12815	3.522	3.88337	2.35719	8.76124	1.50577	2.77954	5.18535	2.09284	5.99979	2.94316	3.11221	0.354036	2.13658
FCGR3A	4.93322	2.48942	8.46274	0.750611	5.4118	4.61016	9.34325	3.181	0.117396	3.9431	4.58188	0.052177	0.0365145	0
FCGR2B	3.41433	2.15713	2.27971	4.30215	2.29327	1.95428	2.02403	4.24328	1.57655	2.09763	0.376445	0.026006	0.0832667	0.0408938
FCGR3B	0.0221958	0.0207609	0.0151932	0.0322229	0.0189469	0.0219869	0.0187224	0.00335064	0.0136583	0.0281736	0.0940563	0.060542	0	0
FCRLA	0.00147065	0.0128721	0.0174115	0.00440086	0.00390323	0.00465037	0.00920128	0.00532274	0	0	0	0	0	0.190486
FCRLB	0.0467508	0.0671422	0.0549256	0.0710466	0.0245252	0.0838972	0.147655	0.144528	0.0853198	0.0680992	0	0	0	0
DUSP12	0.13253	0.201308	0.116728	0.149223	0.148154	0.128226	0.134413	0.123942	0.138174	0.142795	0.153082	0.0587012	0.12948	0.0408938
RP11-474I16.8	0.0209566	0.0222683	0.00857196	0.0196379	0.023343	0.0027231	0.0159037	0.00225828	0.0081952	0.00252091	0	0.0369965	0	0
ATF6	0.419772	0.380259	0.370278	0.284093	0.381297	0.384728	0.564896	0.281161	0.265181	0.38436	0.340416	0.298136	0.318939	0.143268
OLFML2B	0.430003	0.18573	0.375226	0.128274	0.112342	0.16599	0.683301	0.224805	0.0480695	0.212627	0	0	0	0
NOS1AP	0.00239463	0.00115465	0	0	0	0.0151027	0.00281571	0.00336636	0.00730346	0	0	0	0	0.0845059
C1orf226	0.000851846	0.00308709	0	0.00303991	0	0.00243805	0	0.0054551	0	0	0	0	0	0
SH2D1B	0.0117257	0.00490506	0	0.0109832	0.0140639	0.00427779	0	0.013424	0.0153298	0.123331	0.135914	0	0	0
UHMK1	0.498201	0.507479	0.330486	0.39666	0.276703	0.505537	0.370766	0.391084	0.47101	0.495239	0.220649	0.38201	0.382441	0.347346
RP11-359K18.3	0	0.00535171	0.00131805	0	0	0	0.00147808	0.00405631	0.00219054	0	0	0	0	0
UAP1	0.0953486	0.138368	0.0695567	0.186205	0.258611	0.114723	0.135847	0.0931048	0.162741	0.151689	0.0306701	0.159481	0.393388	0.0477102
DDR2	0.00122739	0.000573215	0.00300111	0	0.00168715	0.00855131	0.0135677	0.0101495	0.00259091	0.0205125	0	0	0	0
HSD17B7	0.13329	0.174518	0.160175	0.100066	0.232336	0.145719	0.10416	0.108882	0.143361	0.175316	0.0954159	0.149733	0.0740609	0.35722
C1orf110	0	0	0	0	0	0	0	0	0	0.0122707	0	0.0205831	0	0
RGS4	0.00384719	0.0109411	0.0155771	0	0.00281129	0.0196065	0.00166242	0.00327029	0	0.00500824	0	0	0	0
RGS5	0.00143616	0.0014447	0.0443114	0.00571949	0.00342716	0.00510993	0.00740492	0.0663269	0.00214284	0.0103675	0	0	0	0
RP11-267N12.3	0.00875953	0.0150825	0.00116832	0.0077643	0.00553956	0.0103687	0.00182161	0.0128691	0.0171671	0.0256678	0.0472871	0	0	0
NUF2	0.0386993	0.823378	0.0141191	0.0336181	0.0325743	0.0280218	0.0157971	0.0230262	0.0142775	0.0655865	0	0.0134868	0	0.090712
PBX1	0.0304423	0.0146189	0.0189557	0.00898279	0.00982974	0.0748652	0.0251975	0.021937	0.0185876	0.0565482	0.0693441	0.028278	0.84463	0.102374
RP11-306I1.2	0.00614394	0.00915183	0.00209285	0.00266218	0.0193309	0.00680076	0.00254015	0.0044151	0	0	0.0184015	0	0	0
MGST3	1.49765	2.12412	2.69633	1.33278	1.84066	2.52812	2.20369	2.71832	4.31251	1.55805	0.877432	0.879445	0.579089	0.487099
ALDH9A1	0.281399	0.285967	0.33912	0.222341	0.282948	0.266544	0.324859	0.201582	0.479397	0.371277	0.178041	0.164864	0	0.0810708
RP11-466F5.10	0	0.000931974	0	0	0	0	0	0.00355797	0	0	0.0265175	0	0	0
TMCO1	1.26295	1.42929	1.01463	1.09826	1.10514	1.29464	1.1458	0.866914	1.1104	1.29974	0.982038	0.637073	0.674379	1.73877
RP11-466F5.8	0.00131716	0	0	0	0	0	0.00182229	0.00206162	0	0	0	0	0	0
UCK2	0.0761404	0.170151	0.0949134	0.143222	0.10382	0.0853748	0.0998323	0.0738291	0.0566476	0.086206	0.0083636	0	0	0.20881
RP11-276E17.2	0	0.00368108	0.00232029	0.00665399	0	0	0	0	0	0.00561674	0	0	0	0
POGK	0.163175	0.184982	0.132182	0.138542	0.0735184	0.15331	0.154627	0.0916309	0.103792	0.174685	0.1362	0.0845964	0	0
TADA1	0.0257863	0.0450527	0.0217703	0.0206066	0.0211032	0.040185	0.0303212	0.00693256	0.0204366	0.0353019	0.0297768	0.0238369	0	0.0408938
RP4-782G3.1	0	0.0038045	0	0	0	0	0	0	0	0	0.0132906	0	0	0
ILDR2	0.00147615	0.0107137	0	0.00551308	0.00380371	0	0	0	0	0.0184609	0	0	0	0
MAEL	0	0	0.000868131	0.00207329	0	0.0284314	0.0035913	0	0	0	0	0	0	0
GPA33	0.00444701	0.0116269	0.00209285	0.0224038	0.00754651	0	0	0.00135541	0	0.0413984	0	0.0160537	0	0
DUSP27	0.0130253	0.00471493	0.00782428	0.00996902	0	0	0	0	0	0	0	0	0	0
RP11-277B15.3	0.00367382	0.00865203	0.0026665	0.0012654	0.00869293	0.00336213	0	0.00600316	0	0.0019471	0	0	0	0
POU2F1	0.0927121	0.128694	0.11843	0.0449161	0.0455351	0.09815	0.0952665	0.0900039	0.0943099	0.108472	0.0798432	0.225517	0.072704	0.0517352
CD247	0.101328	0.0626753	0.0616537	0.0716015	0.0867128	0.0134908	0.0232259	0.127872	0.0958369	1.25375	0.244849	0.144058	0.105405	0.160284
RP11-104L21.3	0	0	0.000378597	0	0	0	0	0	0	0.00346826	0	0	0	0
CREG1	2.42059	1.84879	3.14633	0.84228	1.30485	1.76285	3.07136	2.86594	3.14126	1.41131	0.735916	0.518933	0.542759	0.192332
RP3-455J7.4	0.00523915	0.00314345	0.00357319	0.0018095	0	0	0	0.00130186	0.00447702	0.0037168	0.0570147	0	0	0.0930613
RCSD1	0.571097	0.420481	0.581138	0.309989	0.354006	0.535706	0.56107	0.174484	0.209357	0.621789	0.405815	0.185013	0.0740609	0.246151
MPZL1	0.302028	0.359994	0.3146	0.288395	0.198176	0.384088	0.465074	0.602315	0.202691	0.256346	0.026189	0.412887	0.111259	0.32428
ADCY10	0	0.000685288	0.00665414	0	0	0	0	0.00216313	0	0	0	0	0	0
MPC2	1.2731	1.43082	1.24028	1.17865	0.925651	1.21174	1.19255	2.17008	0.802452	1.05337	0.544944	1.14157	1.50011	0.778455
DCAF6	0.256658	0.217951	0.158897	0.175826	0.167358	0.161147	0.194965	0.197077	0.283921	0.205628	0.114667	0.117999	0	0
GPR161	0.00399861	0.000800221	0.0201522	0.00451088	0	0.0167474	0.0072794	0	0	0.00673981	0	0	0	0
TIPRL	0.356784	0.473179	0.371407	0.527606	0.3026	0.273577	0.344879	0.355242	0.283304	0.427332	0.290756	0.194779	0.340971	0.427753
SFT2D2	0.38238	0.468102	0.478686	0.354515	0.263727	0.518129	0.366759	0.184766	0.155804	0.418937	0.49945	0.533783	0.543504	0.455587
TBX19	0.0222686	0.0227758	0.0191307	0.0293374	0.0141362	0.0401382	0.0292256	0.0345915	0.0379932	0.0105246	0	0.0552772	0	0.154606
XCL2	0.0454236	0.0578999	0.0550689	0.0356502	0.201448	0.00292568	0.0251966	0.048902	0.161269	2.37431	0.136457	0.115436	0	0
XCL1	0.0420838	0.0662418	0.0380588	0.0254781	0.183412	0.000717056	0.0206569	0.0239893	0.194568	1.84282	0.248366	0.0747657	0.347024	0.209307
DPT	0	0	0.00232572	0	0	0	0.00365244	0.00639808	0	0	0	0	0	0
ATP1B1	0.478981	0.40005	0.562143	0.317796	1.28623	0.766543	0.419684	0.278392	1.87886	0.45397	0.297735	0.758769	0.701113	0.58613
NME7	0.104984	0.095496	0.0506972	0.0646666	0.0684734	0.0884554	0.0599457	0.0419816	0.138715	0.187286	0.11154	0.0205435	0.137016	0.0615839
BLZF1	0.148753	0.112833	0.113898	0.0866905	0.0591332	0.0985271	0.132109	0.10641	0.106097	0.173908	0.0317439	0.0781418	0.0365145	0.241033
CCDC181	0	0.00118465	0	0	0.0031573	0	0	0	0.0116403	0	0	0	0	0
SLC19A2	0.0485006	0.0294371	0.0310092	0.0438869	0.0850715	0.0112422	0.0391702	0.0319124	0.402146	0.0764008	0.113604	0.0340698	0	0
F5	0.00135881	0.00412803	0.000907613	0	0	0	0.00576349	0.0133819	0.00734046	0.0130408	0.0304236	0	0	0
SELP	0.00201038	0	0.00115169	0.00138117	0	0	0.00217032	0.00790146	0	0	0	0	0	0
C1orf112	0.0368843	0.0951297	0.0227252	0.0170007	0.0293909	0.0290694	0.0273448	0.0229857	0.00358169	0.0273602	0	0.0621468	0	0
SELL	0.0448236	0.0951843	0.101746	0.0771906	0.171026	0.0721945	0.0848623	0.0457681	0.0502829	0.146085	1.67367	0.464072	0	2.42578
METTL18	0.0352368	0.0646	0.0445902	0.0242948	0.0305092	0.0875377	0.037227	0.0664641	0.0577497	0.0686135	0.0167044	0.0349612	0	0
SCYL3	0.0410526	0.0412174	0.0447211	0.0438656	0.0277682	0.0502956	0.0322798	0.0271384	0.022383	0.0560219	0	0.0197299	0	0
KIFAP3	0.111482	0.105549	0.0898578	0.0983934	0.0690333	0.0819935	0.114163	0.0822489	0.0837634	0.0956293	0.0285417	0.101488	0.271819	0.0891012
GORAB	0.057702	0.0556869	0.0566995	0.0328985	0.0369893	0.0437066	0.0772546	0.0620813	0.157504	0.0748369	0.0184015	0.0727582	0	0.102883
PRRX1	0	0.0010635	0.0265765	0.00174542	0.0068012	0	0.00762064	0.0167017	0.00153587	0.0054286	0.0307779	0	0	0
RP1-79C4.4	0	0	0	0	0	0.00159965	0	0.00681891	0	0.00442061	0	0	0	0
FMO4	0.0332731	0.0159869	0.0212146	0.00415644	0.00608237	0.0241266	0.0194888	0.00532569	0.0432705	0.0345522	0	0.025827	0	0
PRRC2C	1.47661	1.63134	1.16242	1.69702	1.18838	1.529	1.91423	1.04029	0.665868	1.89677	1.34293	1.64557	1.56616	1.66929
VAMP4	0.122975	0.0886751	0.11229	0.0925667	0.122825	0.0823361	0.165872	0.206418	0.230103	0.123866	0.156709	0.052009	0.0535699	0.0517352
METTL13	0.0892023	0.102626	0.102514	0.0825492	0.0294037	0.0910022	0.12916	0.101278	0.116918	0.112968	0.0437353	0.028017	0	0.0408938
DNM3	0.00590259	0.00335026	0.00356959	0.00228934	0.00393819	0.00579537	0.0164745	0.0192498	0.0550801	0	0.0128912	0.0214701	0	0
PIGC	0.227061	0.275889	0.185727	0.190816	0.171667	0.156079	0.211096	0.181182	0.16663	0.259394	0.121205	0.166051	0.19421	0.227044
SUCO	0.111443	0.127169	0.108357	0.0910857	0.0968979	0.12492	0.161304	0.116612	0.102529	0.132079	0.0968987	0.263053	0.111428	0.151866
FASLG	0.00137442	0.00801858	0.0202384	0.00380051	0.0152465	0	0.00575756	0.0189376	0.025542	0.260214	0	0	0	0
RP1-15D23.2	0.00416716	0.000554971	0.00296043	0	0.00341035	0	0.00562229	0	0	0.0139518	0	0	0	0
TNFSF18	0.0194498	0.00857937	0.0184952	0.00704706	0.0938353	0.00518563	0.00643354	0	0	0	0	0	0	0
TNFSF4	0.0210579	0.0151595	0.00568153	0.0180407	0.0109482	0.00835915	0.00658721	0.00166354	0.00637488	0.0380449	0.0128912	0.0795976	0	0
RP11-296O14.3	0.0194157	0.0177129	0.00800511	0.00920263	0.00951478	0.00893322	0.0128936	0.0151933	0.00379487	0.0548028	0	0	0	0
PRDX6	1.7172	1.89613	1.41858	1.9243	1.53822	1.60085	1.58052	1.35583	2.17427	1.77584	1.62685	1.20362	3.7889	2.31542
ANKRD45	0.00370888	0.00120174	0.000676968	0	0.00304158	0.006236	0	0.00211251	0.00574308	0	0	0	0	0
KLHL20	0.0733394	0.0778002	0.0981491	0.0510959	0.0569937	0.130623	0.0842282	0.0389011	0.107751	0.147429	0.0966681	0.0800488	0	0.18085
CENPL	0.0268612	0.208409	0.0236901	0.0149971	0.0187278	0.0489868	0.0389371	0.0482312	0.0118741	0.0445646	0	0.0500968	0	0
DARS2	0.0357468	0.109751	0.0300307	0.0214172	0.030303	0.0740117	0.0427241	0.0196656	0.0116511	0.015899	0.0385005	0.0888535	0	0.0517352
GAS5-AS1	0	0	0.00172263	0	0.0054962	0	0.00219691	0	0.0201424	0	0	0	0	0
ZBTB37	0.0937172	0.0698113	0.0907034	0.0622853	0.0316095	0.0704106	0.0702539	0.0794655	0.0340482	0.0635839	0.0501289	0.0655272	0	0
RC3H1	0.127268	0.157013	0.134095	0.161429	0.116485	0.14372	0.0742526	0.105612	0.109112	0.206148	0.130202	0.14838	0.414327	0.159735
RP11-160H22.3	0.0058745	0.0070025	0.00637448	0.00515823	0.0121403	0.00215036	0.00524731	0	0.00637972	0.0095997	0	0	0	0
RP11-160H22.5	0.00241772	0.00295657	0.00135711	0	0	0.00305458	0.00202644	0	0.00650717	0	0	0.0126079	0	0
RABGAP1L	0.349476	0.350823	0.366252	0.203083	0.198334	0.390069	0.292752	0.10916	0.102791	0.295483	0.398572	0.295322	0.105405	0.752317
CACYBP	1.19335	2.25037	1.3865	1.27456	1.93589	1.19102	1.37559	1.65961	0.831992	1.88202	0.9726	1.41374	0.807547	0.930637
MRPS14	0.424798	0.54326	0.461713	0.418557	0.325666	0.521962	0.439344	0.416704	0.472818	0.359756	0.346091	0.277851	0.376995	0.293771
KIAA0040	0.0960005	0.0760024	0.0581655	0.066065	0.0311401	0.0521461	0.0580291	0.119217	0.0632761	0.157625	0.0130724	0.0889542	0	0
RFWD2	0.184086	0.255403	0.199305	0.233465	0.223006	0.223116	0.253527	0.0914396	0.257027	0.241104	0.332767	0.243016	0.358043	0.426857
RP11-195C7.1	0	0	0.00141733	0	0	0	0	0.00731183	0	0.00118875	0	0	0	0
RP1-35C21.1	0	0	0.00235708	0	0.00918944	0.00554929	0	0	0	0	0	0	0	0
SEC16B	0.009275	0.00738977	0.00798241	0.00843891	0.0088708	0.00613313	0.00311069	0.00938429	0.00538332	0.0129877	0	0	0	0
RASAL2-AS1	0.00926309	0.00312158	0.00389181	0.00513572	0.00206583	0.00347242	0.00202814	0.00959516	0.0182749	0	0	0	0	0
RASAL2	0.127876	0.102934	0.132894	0.102097	0.0659854	0.135031	0.0790787	0.192165	0.170542	0.057676	0	0.0809573	0.0987128	0
C1orf220	0	0.0010702	0.00207452	0	0	0.00315803	0	0	0	0	0	0	0	0
RP5-1098D14.1	0	0.000741316	0	0	0.00368027	0	0	0	0	0	0	0	0	0
RP11-428K3.1	0.00327377	0	0	0.00162428	0	0	0	0	0	0	0	0	0	0
RALGPS2	0.0125527	0.0210813	0.021896	0.0105162	0.00842437	0.0245558	0.071398	0.0231416	0.0186676	0.0438674	0.0966233	0.0903062	0	0.0482074
ANGPTL1	0	0	0	0	0	0.00665555	0	0	0	0	0	0	0	0.0845059
FAM20B	0.0449415	0.0820762	0.053695	0.0407234	0.0291508	0.0405927	0.050214	0.0205384	0.0430339	0.0440624	0.0778933	0.095365	0.104743	0.0816187
TOR3A	0.352148	0.51737	0.344082	0.349864	0.381318	0.535481	0.287138	0.162665	0.8247	0.283371	0.0962662	0.838686	0.322162	0.382065
ABL2	0.387829	0.290029	0.26293	0.309528	1.56258	0.165381	0.880224	0.599452	0.613077	0.695925	0.383533	0.180922	0.0365145	0.0482074
SOAT1	0.617483	0.548648	0.520848	0.380119	0.608592	0.565333	0.577829	0.811382	2.18642	0.506874	0.56952	0.354448	0.337973	0
AXDND1	0	0	0	0.00138593	0	0	0.001424	0	0	0	0	0	0	0
TDRD5	0.00896315	0	0	0.00157479	0	0	0	0	0	0	0	0	0	0
TOR1AIP2	0.411078	0.366761	0.346276	0.373573	0.40654	0.337671	0.391592	0.371524	0.427601	0.422423	0.253853	0.414563	0.830392	0.138422
RP11-533E19.7	0.00803153	0.00364341	0.00298184	0	0	0.00484241	0.00495992	0.00166354	0.0045755	0.00894154	0	0	0	0
TOR1AIP1	0.308362	0.328558	0.244029	0.264999	0.254351	0.235964	0.208341	0.1726	0.214479	0.31468	0.192531	0.185043	0.220283	0.271557
RP11-533E19.5	0.0239785	0.0106187	0.0113258	0.0168371	0.0134223	0.00661351	0.0130902	0.00432021	0.0118189	0.0133817	0.0184015	0.014264	0	0
CEP350	0.545338	0.766144	0.321209	0.454261	0.241092	0.427525	0.745951	0.394092	0.246223	0.49366	0.191716	0.725225	0.274571	0.485627
QSOX1	0.435204	0.480136	0.388297	0.523898	0.338727	0.383089	0.56809	0.394408	0.175454	0.409264	0.388639	0.0817927	0.173719	0
RP5-1180C10.2	0.011767	0.00531535	0.0209889	0.00307034	0.00530432	0.0290753	0.011813	0	0.010029	0.0072608	0	0.0103015	0	0.13533
ACBD6	0.238153	0.265229	0.241453	0.280904	0.160351	0.225915	0.270474	0.178137	0.0891037	0.24168	0.176473	0.116436	0.428547	0.0845059
XPR1	0.0873033	0.076961	0.0578553	0.0657032	0.0658989	0.0608407	0.0610886	0.0839507	0.0413007	0.0835683	0.146387	0.101387	0	0
KIAA1614	0.0112836	0.00712309	0.0158621	0.00419042	0.00340757	0.00353728	0.0041574	0.00813221	0	0.00400861	0	0	0	0
RP11-46A10.5	0.00389511	0	0.000746912	0.00235526	0	0.00571254	0	0	0	0.00226592	0	0	0	0
RP11-46A10.4	0.0165349	0.00866517	0.0104092	0.0188133	0.0027715	0.00666269	0.00563656	0	0	0.00173101	0	0	0	0
STX6	0.581713	0.55336	0.321914	0.619896	0.300013	0.394784	0.484401	0.278868	0.182094	0.402582	0.163264	0.136222	0	0.222406
MR1	0.213884	0.215447	0.297574	0.192512	0.163971	0.282716	0.290481	0.238723	0.303669	0.207495	0.0914398	0.105555	0.203815	0.293012
IER5	3.05579	3.19585	1.95891	2.81788	2.87441	0.703962	1.6682	1.42875	0.39207	2.25012	1.28798	2.93201	0.952913	2.76432
RP11-309G3.3	0.0651866	0.0699161	0.0183448	0.0652421	0.0599564	0	0.0343767	0.0304544	0.0102595	0.0589107	0	0.0316608	0	0.256446
GLUL	7.62141	5.19321	9.93687	3.16121	8.11519	6.88569	13.0513	14.199	8.80016	6.54519	6.88758	0.597357	16.8682	2.45111
RNASEL	0.0560198	0.0617616	0.0517836	0.0299984	0.0273971	0.05444	0.0467845	0.0543727	0.0376425	0.0403755	0.0586159	0	0	0.0542597
RGS16	1.67406	1.22747	0.906707	1.17964	1.28856	1.81094	0.877613	0.581518	0.0675996	1.18329	0.0294228	0.475172	1.60534	0.335437
RP11-317P15.4	0.00562385	0.00305677	0.00915492	0.00437784	0.00712512	0	0.0222908	0.00909677	0	0.00118875	0	0	0	0
NPL	0.484846	0.390012	1.61149	0.0677555	0.501858	1.17543	0.897836	1.02877	1.88107	0.461796	0.382721	0.025827	0.280029	0
DHX9	0.316729	0.575118	0.360892	0.423773	0.299016	0.40326	0.394178	0.301832	0.243433	0.447011	0.246552	0.330869	0.12334	0.188547
LAMC1	0.0287125	0.0126742	0.0235132	0.0148439	0.0152558	0.057531	0.0347589	0.0294594	0.0497834	0.0280895	0	0.0137865	0	0.0408938
LAMC2	0.0634655	0.0430765	0.0072175	0.0291815	0.0379393	0.0859331	0.0236962	0.00505713	0.0550847	0.0192623	0.0224434	0.014264	0	0
SMG7	0.123448	0.147406	0.115444	0.115929	0.0672627	0.160953	0.122379	0.140344	0.102347	0.127599	0.0705068	0.0431038	0.137204	0.158912
NCF2	0.997233	0.814225	0.873406	1.38159	0.409649	0.680297	1.09357	1.49392	0.825355	0.82378	1.33596	0.102237	0	0.174957
RP1-127C7.6	0	0.00271389	0.00227451	0	0	0	0.00193616	0	0	0	0	0	0	0
ARPC5	4.86822	5.57804	4.00313	5.65806	4.12064	4.34804	4.41232	3.10208	5.91836	4.10505	4.22231	2.90009	2.86259	2.13441
RGL1	0.078452	0.0571399	0.17121	0.0514789	0.0977129	0.085889	0.263448	0.0767501	0.116578	0.0910649	0.0199176	0.0103015	0	0
APOBEC4	0.00541101	0.00662502	0	0	0	0	0.00162465	0	0.00552199	0.0166075	0.0499266	0	0	0
COLGALT2	0.015464	0.00719233	0.00893764	0.0205217	0.00819128	0.017426	0.00650168	0.0236479	0	0.0122708	0.0128912	0	0.0832667	0
TSEN15	0.250998	0.328557	0.169958	0.265279	0.235721	0.250235	0.182067	0.103031	0.145606	0.218707	0.091149	0.173739	0.330659	0.243643
C1orf21	0.181664	0.241031	0.114664	0.1992	0.102269	0.253285	0.0741196	0.207734	0.0871092	0.169363	0.0399997	0.846752	0.225813	0
EDEM3	0.209015	0.182946	0.162958	0.117194	0.0629616	0.227376	0.172714	0.123294	0.0861885	0.173268	0.371604	0.126095	0	0
FAM129A	0.283515	0.415969	0.249564	0.364215	0.149571	0.427035	0.669228	0.163786	0.214519	0.497316	0.110059	0.847365	0.0900844	0.237251
RNF2	0.215374	0.211584	0.167803	0.268427	0.199817	0.156324	0.160109	0.245168	0.328797	0.167362	0.111152	0.0551841	0.365012	0
TRMT1L	0.131526	0.102059	0.0998946	0.099976	0.0416041	0.139261	0.145238	0.105371	0.108235	0.137324	0.0449131	0.0162306	0	0.0814047
SWT1	0.0320239	0.0275432	0.0402395	0.00647586	0.0224006	0.0236984	0.0334976	0.0253617	0.0163254	0.0358634	0	0	0	0
IVNS1ABP	0.901708	1.02617	0.496127	1.3686	0.674856	0.623337	0.736738	0.976211	0.837504	1.14874	2.02987	0.616822	0.424951	0.358511
GS1-279B7.2	0.00156663	0.00700888	0.00495479	0.00489677	0	0	0.00231483	0	0	0	0	0	0	0
HMCN1	0	0	0	0	0	0.00380356	0.00491673	0	0	0	0.0108378	0	0	0
TPR	0.647165	1.22656	0.739377	0.630939	0.37983	0.872842	0.892094	0.604772	0.480575	0.995578	0.413409	0.668517	0.777956	0.861374
C1orf27	0.160266	0.220092	0.151029	0.120878	0.138742	0.187605	0.155689	0.121293	0.145319	0.127624	0.0557568	0.0906033	0.0832667	0
PTGS2	0.709966	0.760436	0.156093	1.04746	1.44999	0.135193	0.586865	0.272678	0.145444	0.531037	1.98171	0.206268	4.81645	0
RP5-973M2.2	0.00895038	0.00620075	0.000990435	0.0133922	0.00972716	0	0.00478204	0	0	0.00736647	0	0	0.0365145	0
PLA2G4A	0.10874	0.166438	0.0636607	0.106417	0.221996	0.0742448	0.103799	0.0156107	0.0367682	0.111084	0.0650718	0.0101188	0.0740609	0
RP11-445P19.3	0	0	0	0.00408866	0	0.00636622	0	0	0	0	0	0	0	0
RGS18	0.398273	0.502462	0.163	0.588534	0.345595	0.253955	0.388937	0.0254231	0.0109595	0.2539	0.59618	0.63583	0	0.210744
RP5-1011O1.3	0	0.00076455	0	0.00315654	0.00695836	0.00159965	0.00171117	0	0	0	0	0	0	0
RGS1	40.59	27.509	10.4595	31.8775	33.1918	7.95302	16.3879	13.7655	5.66287	24.4176	3.63545	15.9906	28.2141	15.886
RGS13	0.0297751	0.0230953	0.0120267	0.041113	0.0044638	0.00855289	0.0239763	0.0548456	0.00421898	0.0940198	0	0	4.82021	0.0994453
RGS2	8.31919	5.40835	4.61465	8.06053	9.73423	3.22096	7.07492	1.88224	4.34265	6.35199	8.70565	4.52961	17.075	22.5627
UCHL5	0.215811	0.393869	0.188225	0.258152	0.224438	0.254891	0.234593	0.129784	0.184317	0.267754	0.159919	0.1624	0.290267	0.30605
TROVE2	0.447237	0.461312	0.345652	0.426702	0.44626	0.40493	0.410599	0.249086	0.439254	0.519408	0.389101	0.393923	0.519516	0.770405
RP11-101E13.5	0.00516914	0.00644602	0.00178324	0.00165343	0.00145815	0.00801365	0.00677773	0.00492559	0.00338409	0	0	0	0	0
GLRX2	0.189673	0.27044	0.290198	0.163632	0.232784	0.283152	0.238381	0.275245	0.33298	0.15272	0.0967851	0.0923934	0.146765	0.107699
CDC73	0.35102	0.367046	0.330501	0.318295	0.290764	0.314913	0.450819	0.339961	0.186068	0.434291	0.297704	0.386698	0.372139	0.476479
RP11-476B1.1	0	0	0	0	0	0	0	0	0	0	0	0.0581283	0	0.270378
CFH	0.00391923	0.0134063	0.0265049	0.00517322	0.0116654	0.0735431	0.0290505	0.0170874	0.0221714	0.0225067	0.0274243	0.0320941	0	0.0565313
ASPM	0.0383961	1.36266	0.0230639	0.0261263	0.0274362	0.044568	0.019939	0.0368552	0	0.158842	0	0.04317	0.0365145	0
ZBTB41	0.0728086	0.0727862	0.0800082	0.0520292	0.0385296	0.0830321	0.0946436	0.0373327	0.0509475	0.0617842	0.0316921	0	0.06977	0.0517352
CRB1	0.00376548	0	0.0151796	0.0126207	0.00122592	0.00541637	0	0.00294604	0.00485071	0	0	0	0	0.090712
DENND1B	0.278601	0.340805	0.241186	0.757438	0.294139	0.31539	0.212194	0.23794	0.109552	0.56866	0.0683279	0.914574	0.735778	0.355365
C1orf53	0.0324339	0.0230053	0.0251416	0.0301608	0.0167843	0.056553	0.0265781	0.0264936	0.031979	0.0282956	0.0753074	0	0	0
NEK7	0.26693	0.300841	0.225841	0.264969	0.285191	0.188318	0.177241	0.33564	0.316784	0.338739	0.307933	0.251775	0.211566	0.0517352
PTPRC	4.13615	3.94521	2.60824	5.49808	3.81133	3.1359	5.32	1.70471	1.04304	6.60105	5.18653	3.16909	1.32034	2.6485
MIR181A1HG	0.372653	0.30442	0.170513	0.504608	0.513202	0.118665	0.328446	0.0768082	0.0728222	0.270308	0.512856	0.811361	0	0.211783
NR5A2	0	0	0.00089684	0	0	0.00421568	0.00185673	0.00113731	0.00898371	0.00868658	0	0	0	0
ZNF281	0.216475	0.108816	0.147864	0.119826	0.0996745	0.117606	0.165569	0.342886	0.775082	0.248492	0.458491	0.243094	0.326714	0.370842
KIF14	0.00576901	0.457257	0.00416901	0.0235091	0	0	0.00653304	0.0174163	0.00378053	0.0349548	0.0259262	0.0549148	0.072704	0
DDX59	0.104826	0.146804	0.0930437	0.128215	0.0758756	0.0871074	0.095712	0.103269	0.116386	0.167498	0.0465887	0.0660591	0	0.181902
RP11-92G12.3	0.000974288	0.00233822	0.0012338	0.00312704	0	0	0	0	0	0	0	0	0	0
CAMSAP2	0.141028	0.102211	0.0957376	0.0919878	0.086203	0.0921125	0.145504	0.128309	0.0347563	0.110908	0.103	0.0643492	0	0
C1orf106	0.0264883	0.0149164	0.01152	0.0101133	0.0102081	0.0230924	0.010854	0.0089134	0.00754415	0.0183622	0.0304236	0	0.0832667	0
KIF21B	0.0281077	0.0189064	0.0139384	0.020706	0.0425902	0.00754086	0.0287454	0.00557553	0.00746505	0.0681098	0	0	0.0365145	0
RP11-168O16.1	0.00866031	0.00492623	0.0120689	0.00232449	0	0	0.00332502	0	0	0.0031909	0	0	0	0
TMEM9	0.213074	0.177508	0.236587	0.14254	0.140826	0.21978	0.233422	0.172317	0.044944	0.161556	0.0663964	0.0447019	0.072704	0
TNNT2	0	0	0	0	0	0	0	0.00238548	0	0	0	0.0853697	0	0
LAD1	0.0448725	0.0326386	0.0170953	0.0540648	0.0035651	0.0893051	0.019031	0.018344	0.0214002	0.055253	0.0083636	0.900947	0	0.0859254
TNNI1	0	0	0.00999709	0	0	0	0	0.00737439	0.00629088	0	0	0	0	0
RP11-134G8.8	0.00239598	0	0.00507146	0	0	0	0.0076019	0.0146171	0.0518151	0.0129457	0	0	0	0
PHLDA3	0.0838824	0.0552744	0.0411359	0.0420689	0.0719285	0.0436647	0.0320115	0.117442	0.767175	0.0658716	0.0945961	0.127827	0	0.0517352
CSRP1	0.605931	0.61713	0.570913	0.518844	0.29634	0.474547	0.542834	0.512733	0.125511	0.491353	0.257863	0.758284	0.135227	0
RP11-134G8.7	0.0283525	0.0119377	0.0187353	0.0292494	0.00693357	0.0313302	0.0147475	0.0137804	0.00255515	0.0149799	0	0.019063	0	0
RPS10P7	0.0133531	0.00971837	0.0220861	0.0189022	0.00467238	0.00930123	0.0216404	0.00649978	0.00385016	0.0353601	0	0	0	0
AC096677.1	0.0168497	0.0258173	0.00328421	0.0162071	0.00063092	0.0347124	0.056884	0.0360388	0.00265895	0.0247833	0	0.0817267	0	0
NAV1	0.147456	0.181243	0.166049	0.131031	0.0464618	0.187825	0.129666	0.190091	0.00685131	0.121802	0.062339	0.25841	0	0
IPO9-AS1	0.00645185	0.0107132	0	0.00555291	0	0.00568114	0.00648019	0	0.0335496	0.00173101	0.0399997	0	0	0
IPO9	0.092932	0.244161	0.119604	0.0923691	0.0728837	0.155476	0.069018	0.044796	0.0701313	0.157971	0.0516977	0.0483503	0.072704	0.128781
SHISA4	0.111407	0.0718655	0.0791527	0.0489027	0.0511068	0.0559105	0.0928604	0.119238	0.0160314	0.048161	0.0287677	0.192453	0.0535699	0
LMOD1	0	0	0.00185848	0	0	0	0	0.00518991	0	0.00811239	0	0	0	0
TIMM17A	0.42953	0.678184	0.490916	0.647553	0.731376	0.701441	0.647698	0.357988	1.10235	0.589565	0.533542	0.64832	1.21806	0.305145
RNPEP	0.549005	0.83457	0.602922	0.585276	0.815815	0.555538	0.734694	0.35405	0.522387	0.65787	0.477538	0.40581	0.293351	0.185103
RP11-465N4.4	0.0110996	0.000548138	0.00315659	0.015752	0	0.00394396	0.00466927	0.00289319	0	0	0	0	0	0
ELF3	0.4097	0.256531	0.106124	0.289447	0.348415	0.894883	0.176866	0.178405	0.352993	0.287994	0.380166	0.119807	0.125054	0.18883
ARL8A	0.328858	0.411895	0.445103	0.372598	0.237283	0.421075	0.394747	0.537635	0.26515	0.323987	0.172355	0.0769628	0.168483	0.142447
PTPN7	0.247946	0.467921	0.364136	0.471508	0.347084	0.327329	0.34228	0.278148	0.0658997	0.881581	0.233696	0.338147	1.15079	0.549866
UBE2T	0.060974	0.740406	0.0732296	0.0781571	0.0457726	0.122239	0.0746763	0.0449702	0.0362969	0.173279	0	0.0449488	0.19321	0.0482074
PPP1R12B	0.0393569	0.0406054	0.0430215	0.0624838	0.0426396	0.0392322	0.050594	0.0259326	0.030927	0.0602912	0.0267431	0.0734528	0	0
SYT2	0	0.00406145	0.000528784	0.0256235	0	0	0	0	0	0	0	0	0	0
KDM5B	0.111411	0.0496683	0.0897143	0.122985	0.0587642	0.165103	0.0957262	0.147009	0.293467	0.199535	0.0345669	0.23038	0.342721	0.294743
RP11-480I12.10	0	0	0.000811225	0	0.0050256	0.00187906	0	0.00259817	0	0	0	0	0	0
PCAT6	0.0262284	0.0110678	0.0241395	0.0144535	0.0122096	0.0293399	0.0146317	0.0611728	0.0579605	0.0101544	0	0	0	0.0788793
RABIF	0.288017	0.331817	0.325962	0.289031	0.213616	0.247614	0.282888	0.283883	0.237002	0.280964	0.148328	0.115557	0.109543	0.214759
KLHL12	0.132882	0.0960523	0.129336	0.0746251	0.0888461	0.169517	0.108701	0.0673974	0.171944	0.0914012	0.185088	0.0601135	0.0832667	0.0477102
ADIPOR1	0.756313	0.80545	0.722074	0.651051	0.905497	0.530556	0.82617	0.874431	1.46877	0.651885	0.850034	0.494698	0.723887	0.2754
CYB5R1	0.356757	0.27949	0.437198	0.283211	0.30121	0.256602	0.317958	0.247392	0.238877	0.260024	0.16096	0.05623	0.314316	0.107699
TMEM183A	0.460022	0.542534	0.381902	0.471195	0.355545	0.276519	0.492745	0.335562	0.457195	0.490733	0.350962	0.428526	0.486805	0.227189
PPFIA4	0.00486685	0.011167	0.013351	0.0105591	0.00156505	0.0267886	0.0214346	0.0183357	0	0.0130705	0	0	0	0
ADORA1	0.0121287	0.0321204	0.0406777	0.0150835	0.0133413	0.0495888	0	0.0105823	0	0.00843046	0	0	0.06977	0
MYBPH	0.00611377	0.0190967	0.00488778	0.00216214	0.00361185	0	0	0.00255923	0	0.00557338	0	0	0	0
CHI3L1	0.0276627	0.0136555	0.0148561	0.0187185	0.0878709	0.128989	0.056421	0.0352256	7.03068	0.131622	0.0751251	0.0321394	0.179313	0
CHIT1	0.003683	0.0143433	0.028241	0.0101955	0.141049	0.0131659	0	0.0843322	14.6872	0.176441	0.0494805	0.0832086	0	0
RP11-134P9.3	0.018295	0.0100162	0.0109488	0.00605495	0.041818	0	0.00806431	0.0106731	0.0108888	0.0246639	0.0329776	0	0.307502	0
LINC01136	0.00724819	0.00641033	0.00745287	0.00728075	0.00249404	0	0.0116468	0	0.00348745	0.00510477	0.0130724	0	0	0
BTG2	1.58546	1.43642	1.48179	1.26194	4.72459	1.86868	2.06763	0.939478	1.18805	2.23345	2.98581	3.07452	3.31643	9.83772
FMOD	0	0.00523351	0.000734009	0	0.00329989	0.00597348	0.00605002	0	0.00476273	0.0105729	0	0	0	0
PRELP	0	0	0.00189784	0	0	0	0	0	0	0.00524368	0	0	0	0
ATP2B4	0.146365	0.178462	0.0806517	0.156311	0.0947486	0.136632	0.133682	0.062308	0.0766761	0.245954	0.124861	0.0882694	0	0.15541
LAX1	0	0.000587631	0.00811549	0.00146209	0.00459275	0	0.00390898	0	0	0.103387	0.0083636	0.00811528	0.445586	0
ZC3H11A	0.330859	0.325033	0.289539	0.253872	0.159806	0.312695	0.256504	0.243759	0.284018	0.327987	0.304955	0.0935498	0.219102	0.497723
ZBED6	0.110761	0.0622576	0.0843385	0.0767963	0.0480431	0.0816198	0.105271	0.0934991	0.0187719	0.0775936	0.0872914	0.0302412	0.180479	0.13815
SNRPE	1.44182	2.56186	1.61016	1.856	1.14208	2.00819	1.72598	1.49033	1.45378	1.61201	1.40234	1.50852	1.29007	1.77374
SOX13	0.0026457	0	0.00558996	0.0071003	0	0.0104612	0.00153713	0.0277398	0.0193693	0.00430142	0.027392	0	0.0820856	0.0845059
ETNK2	0	0.00291857	0.00803402	0.00174961	0.00489696	0	0	0.00184014	0.0128734	0	0	0	0	0
REN	0.00595618	0.0048165	0.000887615	0.00546181	0	0.0353633	0.0296206	0.00654341	0	0.00706749	0.0325135	0.019063	0	0
KISS1	0	0.00508541	0.00268059	0	0	0.0311185	0.0126411	0.00135264	0	0.00595189	0	0.0300528	0	0
GOLT1A	0	0.000882162	0.0105913	0.00204995	0	0.00130815	0.00281571	0.00238066	0	0	0	0	0	0
PLEKHA6	0	0.0118155	0.00252273	0.0018095	0.00364601	0.00408158	0.0024361	0.0123594	0	0.0108217	0	0	0	0
PPP1R15B	0.204971	0.246681	0.159709	0.214213	0.332312	0.156834	0.397164	0.228441	0.459301	0.275966	0.515132	0.239361	0.811262	0.136811
PIK3C2B	0.0275702	0.0177953	0.0092806	0.0190835	0.0155168	0.0535853	0.0105803	0.0179609	0	0.0175458	0	0	0.105565	0
MDM4	0.513143	0.484887	0.330258	0.505195	0.352023	0.478605	0.356603	0.434007	0.218482	0.577702	0.275558	0.153598	0.159135	0.806222
RP11-430C7.4	0.00363721	0	0.00455702	0.00330236	0	0.0017365	0	0.00217397	0	0	0	0	0	0.0408938
LRRN2	0.00239643	0.00111659	0	0.00451832	0	0	0	0	0	0	0.0153261	0	0	0
RP11-430C7.5	0	0.00544373	0.00208297	0	0.0119206	0	0.00538603	0	0	0	0	0	0	0
NFASC	0.00126786	0.00148741	0.000611805	0	0	0.0027231	0	0.00163585	0	0.00354593	0	0.0300528	0	0
TMEM81	0.00247346	0.00461495	0.00592036	0	0.00504076	0.00150194	0.00237799	0.0104438	0.00584805	0.00304695	0	0	0	0
RBBP5	0.101146	0.141433	0.0891604	0.105808	0.109648	0.0792911	0.116016	0.118115	0.189402	0.0890035	0.0939805	0.0896007	0.143728	0.0477102
DSTYK	0.0524603	0.0319949	0.0900834	0.0256176	0.0313641	0.0623618	0.0518169	0.0499047	0.071284	0.0442213	0.0354617	0.0439268	0.0365145	0
TMCC2	0	0.000957076	0.00383695	0	0	0	0.00278371	0.00530893	0	0.0148467	0	0.0195316	0	0
NUAK2	0.030513	0.021299	0.0335309	0.0243018	0.0551495	0.050593	0.0121453	0.0227621	0.0521071	0.0444177	0	0.213273	0	0.0817875
LEMD1	0.00181541	0.00160344	0.00114473	0	0	0.00520981	0.00174231	0	0	0.00262184	0	0	0	0
CDK18	0.104313	0.0653722	0.169811	0.0218258	0.0262069	0.108704	0.0345142	0.315687	0.110233	0.0431376	0.0108378	0.0205831	0.0535699	0
MFSD4	0.0142186	0.00616729	0.00202057	0.00207717	0	0.013824	0.00181042	0.00530893	0.0175655	0	0.0136078	0	0	0
ELK4	0.158001	0.189059	0.143258	0.157167	0.114268	0.15086	0.138316	0.148116	0.128859	0.222881	0.0967135	0.236678	0.210898	0.297594
SLC45A3	0.0155908	0.0076544	0.017988	0.0152896	0.00535756	0.0195054	0.00317366	0.0235722	0.0158285	0.00538089	0	0	1.84438	0
NUCKS1	2.00851	5.97463	1.85396	2.23617	1.13455	2.19012	1.58504	1.56044	1.08164	1.78641	0.779314	1.44297	1.63734	1.28682
RAB7L1	0.284226	0.284961	0.232176	0.217616	0.15248	0.281166	0.250814	0.152676	0.0648748	0.334839	0.0418436	0.529443	0.0832667	0.183872
SLC41A1	0.0350551	0.0421694	0.041747	0.014446	0.0288828	0.01201	0.0249255	0.0335546	0.0152168	0.0968906	0	0	0.0535699	0
PM20D1	0	0	0	0	0	0	0.00549759	0	0	0.00341464	0	0	0	0
RP11-312O7.2	0.0768021	0.0580649	0.0524499	0.0748187	0.0820908	0.0210982	0.0716901	0.0123814	0.00384417	0.0558537	0.0276855	0.133395	0	0
FAM72A	0.149889	0.27126	0.102905	0.149252	0.102629	0.0456717	0.0597088	0.0608576	0.0232971	0.13045	0.241719	0.07959	0	0.107699
C1orf186	0.148071	0.104041	0.0536355	0.124985	0.0433133	0.526203	0.120201	0.0394261	0.0280517	0.112712	0.101351	0.2202	1.7855	1.05883
CTSE	0	0.00217829	0.00223155	0.0040702	0.00647739	0	0	0.0045885	0.00750166	0.00992942	0	0	0	0
SRGAP2	0.414999	0.42847	0.367898	0.34352	0.714962	0.203186	0.407069	0.138321	0.140192	0.465546	0.523544	0.34002	0	0.155206
SRGAP2-AS1	0	0	0	0.00319217	0.00357018	0	0	0	0	0	0	0	0	0
IKBKE	0.243706	0.189474	0.145642	0.182157	0.0756983	0.196066	0.234712	0.0814584	0.0217987	0.161253	0.111247	0	0	0
RP11-534L20.5	0	0.00435456	0	0.00363481	0	0	0.00332336	0.00144201	0	0	0	0	0	0
RASSF5	0.393611	0.309555	0.15648	0.579943	0.767933	0.135574	0.232908	0.131421	0.185925	0.636924	0.897282	0.622497	3.72166	0.556489
EIF2D	0.1056	0.0971216	0.0878768	0.113108	0.116017	0.103545	0.119375	0.084696	0.152554	0.103751	0.0650374	0.111897	0	0.220148
RP11-343H5.6	0.000620805	0.00120174	0.00685861	0.00212586	0.00234274	0	0.00368941	0.0161847	0.00255515	0	0.0199347	0	0	0
DYRK3	0.00401155	0.00195765	0.00171241	0.00278318	0.0238853	0.00193475	0.00223147	0.0351046	0.0511276	0.0182404	0.017972	0	0	0.0859254
MAPKAPK2	0.168777	0.231515	0.291264	0.152918	0.205079	0.188219	0.183497	0.217458	0.174038	0.281782	0.206815	0.0636929	0.466882	2.05156
IL10	0.12429	0.0821946	0.14191	0.0536786	0.946474	0.0384681	0.293319	0.0795132	0.356581	0.34234	1.26774	0	0.0885395	0
IL19	0.00921294	0.00731887	0	0.0135733	0.0222413	0.0682731	0.0151368	0	0	0.00147434	0	0	0	0
IL24	0.0103021	0	0.000990435	0	0	0	0	0.00422503	0	0	0	0	0	0
FAIM3	0.0258605	0.0162657	0.0304222	0.0210307	0.0614047	0.0313371	0.0466634	0.0377028	0.474691	0.147203	0	0	0	0.0477102
PIGR	0.577013	0.419948	0.015171	0.616471	0.565949	0.178608	0.0604418	0.0113753	0.189585	0.285596	0.131997	0.102689	0.159135	0.0810708
FCAMR	0.00383143	0.0127071	0	0.00407306	0.00263595	0.00574784	0	0	0	0	0	0	0	0
C1orf116	0	0.00461026	0.00540004	0	0.00868006	0.0179888	0.00733987	0.00984879	0	0	0.0284093	0.0434987	0	0
YOD1	0.0383241	0.048441	0.0228455	0.0317349	0.021997	0.0270201	0.0429664	0.0404516	0.0437681	0.0540186	0.0502813	0	0.0832667	0.0477102
PFKFB2	0.0479247	0.0342492	0.0663319	0.0163294	0.0470476	0.0602502	0.0566838	0.00915286	0.0715253	0.0209097	0	0	0	0.835945
C4BPB	0	0.00460468	0.0108272	0	0	0.0281077	0.0200476	0.00727426	0.00476273	0.00889824	0	0	0	0.0814047
C4BPA	0.0198137	0.00832236	0.00175482	0.0137351	0.0111257	0.0080159	0	0.00158454	0	0.00672395	0	0	0	0
CD55	0.256822	0.287817	0.315341	0.551552	0.924222	0.307901	0.785695	0.359371	0.790455	0.682184	3.66177	1.04469	1.12575	1.36076
CR1	0.0200977	0.0223269	0.203044	0.00478498	0.0275809	0.0932514	0.165214	0.113203	0.0472867	0.0217608	0.0851598	0	0	0
CR1L	0.00392681	0.0372934	0.0170861	0.00322498	0.00637276	0.0187467	0.0057193	0.0230644	0.00448036	0.00614861	0	0	0	0
CD46	0.677059	0.455369	0.605183	0.405767	0.574253	0.466168	0.622023	0.509072	0.877006	0.740106	0.601793	0.41852	1.133	0.320024
CD34	0.000653837	0	0.0115143	0.000721137	0.00122592	0.00261631	0.00694996	0.0142291	0	0.00812945	0	0.0134868	0	0
PLXNA2	0.0190331	0.0343438	0.0281816	0.0426157	0.0431816	0.0162559	0.0401269	0.0419506	0.0123834	0.0146793	0.0278379	0.0860039	0	0
MIR205HG	0.00643334	0.00911217	0.0121934	0.00400982	0.0105721	0.0742111	0.00535884	0.00241479	0.00486193	0.00807821	0.0343411	0.0340307	0	0
CAMK1G	0.00227507	0.000810344	0.00867724	0.00189266	0	0.00253516	0.00980717	0.0133278	0.0125113	0.00489952	0.0083636	0.025827	0	0
LAMB3	0.108922	0.078121	0.0581353	0.0724827	0.0228845	0.0748764	0.0733759	0.0489823	0.0205771	0.0586453	0.0437468	0.0750812	0.0978091	0
RP1-28O10.1	0.0118642	0.00908862	0.00543585	0.00345853	0.000971496	0.0156205	0.00671922	0.00723468	0.0209773	0.00250412	0	0.025827	0	0
G0S2	13.9262	8.22326	2.3724	11.0839	17.18	1.90889	5.29765	9.91962	5.3728	7.14069	19.5158	10.6768	0.895042	0.451656
HSD11B1	0	0.00404667	0.0282551	0.00577133	0.00513616	0.00574987	0.165498	0.0063715	0.176323	0.01444	0	0	0	0
TRAF3IP3	0.509239	0.390353	0.331022	0.362295	0.176813	0.247363	0.240152	0.190682	0.146133	0.734264	0.403468	0.0773832	0.376687	0.65484
C1orf74	0.0100029	0.00627432	0.0130338	0.0056968	0.00743397	0.014095	0.0101911	0.0114244	0.0113021	0.00182956	0	0	0.0365145	0
IRF6	0.0228169	0.0161518	0.020976	0.0172351	0.0489306	0.0291344	0.0285518	0.0135265	0.0455455	0.00567588	0.0568871	0.0274333	0.0365145	0
DIEXF	0.0440824	0.0519108	0.0595602	0.0652932	0.0329914	0.0467129	0.0483139	0.0616541	0.0893044	0.0438191	0	0.0334829	0	0
SERTAD4-AS1	0.00726265	0	0.00793708	0	0.0104469	0.0197569	0.00196603	0.0128822	0.00671834	0	0.0259262	0	0	0.0859254
SERTAD4	0.00319936	0.00127721	0.00374181	0.00212411	0	0	0.00217032	0	0	0	0	0	0	0
[truncated: 17,095 more rows]

## Sheet: Para.Lynphoid.AverageExpression
	0	1	2	3	4	5	6	7	8	9	10	11	12	13	14
[truncated: 18,013 more rows]

[truncated: 3 more sheets: Tumr.Lynphoid.AverageExpression, Para.Epithelial.AverageExp, Tumor.Epithelial.AverageExp]
