# Supplementary material for: Phenotyping of immune and endometrial epithelial cells in endometrial carcinomas revealed by single-cell RNA sequencing
Source: Aging (Albany NY). 2021 Jan 10;13(5):6565–91. doi: 10.18632/aging.202288 (PMC7993685; doi:10.18632/aging.202288)
Supplement: Additional File 4 [file aging-13-202288-s005.xlsx]

## Sheet: Para.Myeloid cluster
Additional File 4. Cluster characteristics.
Cell type	classical monocyte		non-classical monocyte	macrophage			cDC2	cDC1	pDC	mast
Subcluster	2	6	8	0	3	7	1	5	4	10
	VCAN	S100A12	MTSS1	C1QA	SPP1	CHIT1	CD1C	IDO1	LILRA4	KRT86
	S100A12	FCN1	CDKN1C	C1QC	C1QC	CHI3L1	FCER1A	CLEC9A	MAP1A	TNFRSF25
	EREG	CSTA	RP11-290F20.3	C1QB	KIAA0101	CCL18	CD1E	DNASE1L3	LRRC26	KRT81
	FCN1	RP11-1143G9.4	FCGR3A	MSR1	C1QB	CYP27A1	C15orf48	DUSP4	SMPD3	RORC
	THBS1	LYZ	FAM65B	CCL3L3	SLPI	CTSK	IGLL5	LGALS2	SCT	TNFSF11
	S100A8	S100A8	LST1	CCL3	TREM2	RARRES1		C1orf54	IL3RA	KIT
	S100A9	S100A9	FCN1	SGK1	HAMP	FABP3		TACSTD2	IGJ	LINC00299
	SLC11A1	S100A4	AIF1	IER3	APOC1	MARCO		HLA-DPB1	CXCR3	SPOCK2
	NAMPT	S100A6	CNIH4	CCL4	HSPA1B	NUPR1		VMO1	CLEC4C	LINC00176
	CLEC4E	MNDA	LILRB2		HSPB1	GPNMB		BIRC3	PTCRA	PRR5
	TREM1	CFP	SERPINA1		HSPA1A	PLA2G7		HLA-DPA1	COBLL1	ALDOC
	LYZ	VCAN	COTL1		APOE	APOC1		CST7	DERL3	DLL1
	SLC25A37	TXNIP	IFITM2		RGS16	ACP5		CPNE3	IRF4	XCL1
	CD55		STXBP2		TUBA1B	SAA1		SNX3	SIDT1	TNFRSF18
	APOBEC3A		APOBEC3A		HSPA6	MGLL		CPVL	CLIC3	KLRB1
	SAMSN1		ARL4A		DNAJB1	APOE			TSPAN13	TMIGD2
	TIMP1		LYST			MMP9			SPIB	TOX2
	IL1B		IFITM3			CYB561A3			ZFAT	XCL2
	AREG		CD52			LGALS3			BCL11A	MFGE8
	CXCL2		S100A4			FTL			GZMB	CD96
			CFD			CSTB			P2RY14	SPRY1
			BCL2A1			GDF15			KIAA0226	TNFRSF4
			FAM26F			NPL			TCF4	TCF7
			RHOC			GM2A			SLC15A4	RORA
						CD63			ITM2C	LIF
						FDX1			PPP1R14B	AQP3
						ATOX1			PTPRS	IL7R
						HEXB			RASD1	PLAT
						ATP6V1F			TPM2	TLE1
						GPX4			C12orf75	CD2
						BRI3			IRF7	LTB
						ASAH1			SERPINF1	IL2RG
						CD59			APP	ST3GAL1
						IFI27			TCL1A	PBXIP1
						LIPA			EGLN3	CD69
						CAPG			SEL1L3	RNF19A
						CHCHD6			CCDC50	IL4I1
						FTH1			PLD4	CD52
						SLPI			UGCG	GPR171
						CD68			FUT7
						FABP5			OPN3
						CD9			PMEPA1
						CTSD			CLN8
						ANXA2			SEC61B
						CFD			IRF8
						MGST3			LPIN1
						PLD3			TNFRSF21
						HLA-DMB			SELL
						IFI6			N4BP2L1
									INPP4A
									PLAC8
									CD2AP
									GPR183
									SLC7A5
									DUSP5
									PPM1K
									CXCR4
									SPCS1
									POLB
									GAS6
									NR3C1
									PLP2
									PTPRCAP
									PRMT10
									RRBP1

## Sheet: Tumor.Myeloid cluster
Cell type	classical monocyte	proliferation	macrophge							cDC2	cDC1	pDC	mast
Subcluster	10	1	0	2	4	5	6	7	8	3	11	13	12
	FCN1	KIAA0101	NA	SEPP1	INSIG1	DEFB1	NA	SLAMF9	CTSK	FCER1A	DNASE1L3	CLEC4C	CPA3
	APOBEC3A	UBE2C		RNASE1	JUNB	SCGB3A1		SLC2A1	CHIT1	CD1C	CLEC9A	SCT	IL1RL1
	CFP	TOP2A		CTSB	KLF2	PTGDS		HK2	CHI3L1	CD1E	IDO1	FAM129C	SLC18A2
	THBS1	MKI67		LGMN	DUSP2	TFF3		CSTB	CYP27A1	CD1A	HLA-DOB	TCL1A	HDC
	FPR2	CENPF		FOLR2	GPR183	AGR2		BNIP3	MARCO	CLEC10A	LGALS2	LILRA4	KIT
	EREG	CDK1		CXCL9	DNAJB1	SCGB2A1		VIM	GDF15	PLAC8	CCL22	SMPD3	RP11-354E11.2
	S100A12	NUSAP1			OLR1	WFDC2		IGLL5	SPARC		BIRC3	LRRC26	GATA2
	LILRA5	TYMS			HSPB1	APOC1		ADM	RARRES1		CCR7	PTPRS	TPSAB1
	VCAN	TK1			CCL3L1	APOE		S100A10	ACP5		LAMP3	DNASE1L3	MAOB
	CLEC12A	RRM2						NUPR1	PLA2G7		DUSP4	MZB1	RGS13
	NAMPT	BIRC5						PLIN2	GPNMB		LSP1	BCL11A	SLC45A3
	CD52	CKS1B						RALA	CFD		IRF8	IGJ	HPGD
	ARL4A	STMN1						FTH1	FTL		BASP1	LAMP5	CLU
	CFD	HMGB2						CTSL	NUPR1		HLA-DPB1	DERL3	VWA5A
	S100A8	SMC4						HILPDA	FTH1		CPNE3	ZFAT	ITM2A
	S100A9	HMGB1						SOD2	GPX4		CST7	IL3RA	BIRC3
	CD55	H2AFZ						IL8	CD52			PTCRA	LAT
	AREG	TUBB						MT1F	CYB561A3			CXCR3	HPGDS
	TIMP1	HMGN2							LGALS3			SPIB	AREGB
	SAMSN1	PTTG1							CSTB			TSPAN13	B4GALT5
	RP11-290F20.3	TUBA1B							TSC22D1			CLIC3	ACSL4
	BCL2A1	HIST1H4C							FDX1			TPM2	SAMSN1
	NFKBIA								CCL18			SELL	LTC4S
	LST1								MGST1			IRF4	LAPTM4A
	RP11-1143G9.4								RP11-290F20.3			ITM2C	CD44
	IFITM2								LIPA			GZMB	LMNA
	CSTA								APOC1			DUSP5	CD9
	CXCL2								HEXB			RASD1	NSMCE1
	LYZ								RGCC			LTB	SRGN
									ISCU			IRF7	CD69
												PTPRCAP	AREG
												PLD4
												CCDC50
												PLAC8
												C12orf75
												IRF8
												PPP1R14B
												PPP1R14A
												ERN1
												TCF4
												SERPINF1
												UGCG
												SEC61B
												SUSD1
												OFD1
												APP

## Sheet: Para.Lymphoid cluster
Cell type	CD4+ T	Treg	prolifaration	CD8+ T			NKT	NK			ILC3
Subcluster	4	8	3	2	5	10	11	0	6	12	1
	IL7R	FOXP3	MKI67	CD8A	IL7R	CLECL1	FGFBP2	KLRC1	RP11-354E11.2	BCL2L11	RP11-279F6.3
	CCR7	IL2RA	TOP2A	CD8B	TOB1	AC002331.1	KLRG1	TYROBP	AREG	TMIGD2	SOST
	KLF2	AC017002.1	CENPF	HLA-DPB1		AC006129.4	FCGR3A	KRT81	CMC1	TNFRSF18	CD247
	SELL	LAIR2	UBE2C	GZMH		CTLA4	KLF2	IGFBP2	TYROBP	KLRB1	NDFIP2
	GPR183	TNFRSF9	NUSAP1	HLA-DRB1		CD3D	PLEK	KRT86	NKG7	GZMA	FCER1G
		TBC1D4	ASPM	HLA-DRA		ENTPD1	KLRF1	GNLY	KLRD1
		TNFRSF4	RRM2			CD8A	GZMH	ZNF683	REL
		CTLA4	CDK1			RGS1	PLAC8	CMC1	CD83
		BATF	HIST1H1B			CD3G	SPON2		GNLY
		RTKN2	TPX2			TIGIT	PRF1		XCL1
		CD27	BIRC5						GZMB
		ICOS	DLGAP5						CCL3
		SPOCK2	ZWINT
		BIRC3	AURKB
		TIGIT	CASC5
		DUSP4	CCNA2
		GLRX	CDKN3
		PMAIP1	PRC1
		CORO1B	SPC25
		TNFRSF18	GTSE1
		SAT1	CCNB2
		GADD45A	TYMS
		LTB	CENPE
			KIAA0101
			MAD2L1
			CENPM
			TK1
			CKS1B
			HIST1H2AM
			STMN1
			SMC2
			TUBA1B
			HMGB2
			TUBB
			H2AFZ
			HMGB1

## Sheet: Tumor.Lymphoid cluster
Cell type	CD4+ T			Treg	prolifaration	CD8+ T			NKT	NK	ILC3
Subcluster	3	8	11	5	6	0	1	2	10	7	4
	IL7R	CCR7	IL7R	TNFRSF4	UBE2C	LAG3	CREM	GZMK	FGFBP2	TYROBP	RP11-279F6.3
		LEF1	CCR6	AC017002.1	KIAA0101	GZMB	FTH1	CXCL13	S1PR5	GNLY	TMIGD2
		KLF2	RP11-138A9.1	IL2RA	MKI67	AC006129.4	ZNF331		FCGR3A	FCER1G	FCER1G
		SELL	LEPROTL1	BATF	NUSAP1	KRT86	CXCR4		KLRG1	CMC1	CD247
		IL7R	RORA	LTB	TOP2A	RGS2	EPAS1		PLAC8		NDFIP2
		JUNB	CD40LG	BIRC3	CENPF	CCL3	PFKFB3		PLEK		CTSW
		GPR183	GPR183	TNFRSF18	TYMS		CD69		KLF2		TYROBP
			CREM		RRM2		HERPUD1		SPON2		LAT2
			CCR7		CDK1		PPP1CB		KLRF1		STARD3NL
			RP11-138A9.2		ASPM		NR4A2		GNLY
			CCL20		BIRC5		DUSP5		KLRD1
			SPOCK2		ZWINT		CCL4
			KLRB1		TPX2		RP11-138A9.1
					AURKB		SYTL3
					HIST1H1B		XCL1
					CDKN3		TNFSF9
					TK1		FAM177A1
					CKS1B		KLRB1
					MAD2L1
					CENPM
					STMN1
					SMC2
					TUBB
					TUBA1B
